# Supplementary material for: Global Analysis of Proline-Rich Tandem Repeat Proteins Reveals Broad Phylogenetic Diversity in Plant Secretomes
Source: PLoS One. 2011 Aug 2;6(8):e23167. doi: 10.1371/journal.pone.0023167 (PMC3149072; doi:10.1371/journal.pone.0023167)
Supplement: Table S9 — Full details of all Pro-rich TR clusters found in the PlantPro20 database. (XLS) [file pone.0023167.s019.xls]

## Sheet: Table S9
Table S9. Full details of all Pro-rich TR clusters found in the PlantPro20 database.
Shown below are all Pro-rich TR clusters identified within the PlantPro20 database (see Materials and Methods).
Initially, only unique TR Module1 consensus motifs from sequences with a predicted signal peptide were clustered.
After clustering was finished, all remaining TR motifs from PlantPro20 (Table S2) with 100% identity to the original TR Module consensus motifs were added.
Thus, many TR consensus sequences shown below are identical.
1 TR Module is defined as a TR motif that spans at least 100 aas or at least 50 aas and 33% of its protein sequence.
In addition, rather than listing full protein sequences or reading frames, the original sequence identifier and database ID corresponding to each TR motif are included.
Database IDs:
TC=The Gene Index (http://compbio.dfci.harvard.edu/tgi/plant.html)
TA = TIGR Transcript Assemblies (http://plantta.jcvi.org/)
NR = gene identifiers from NCBI Non-Redundant Database (http://www.ncbi.nlm.nih.gov/)
For TC/TA sequences, the number immediately following the identifier (i.e. 1,2,3) is the forward reading frame containing the TR motif.
Cluster ID	Plant Taxonomy			Sequence Properties					TR Properties
	Family	Genus	Species	Database ID	Identifier	Locus	Name	Length (aas)	TR consensus	Period	#Copies	Start	End
1	Brassicaceae	Arabidopsis	thaliana	TC	TC324434 1 [Arabidopsis thaliana 14] TC324434			848	PPPPVYS	7	12.71	549	640
1	Rubiaceae	Coffea	canephora	TC	DV703997 2 [Coffea canephora 1] DV703997 similar to UniRef100_Q9M6R7 Cluster: Extensin; n=1; Pisum sativum|Rep: Extensin - Pisum sativum (Garden pea), partial (41%)			180	PPPPVYS	7	2	57	70
1	Fabaceae	Medicago	truncatula	TC	TC127648 2 [Medicago truncatula 9] TC127648 homologue to UniRef100_Q09083 Cluster: Hydroxyproline-rich glycoprotein precursor; n=1; Phaseolus vulgaris|Rep: Hydroxyproline-rich glycoprotein precursor - Phaseolus vulgaris (Kidney bean) (French bean), partial (27%)			205	PPPPVYS	7	17.71	3	153
1	Fabaceae	Medicago	truncatula	TC	TC132033 1 [Medicago truncatula 9] TC132033 homologue to UniRef100_Q09083 Cluster: Hydroxyproline-rich glycoprotein precursor; n=1; Phaseolus vulgaris|Rep: Hydroxyproline-rich glycoprotein precursor - Phaseolus vulgaris (Kidney bean) (French bean), partial (40%)			273	PPPPVYS	7	3.71	197	225
1	Fabaceae	Medicago	truncatula	TC	BE999886 2 [Medicago truncatula 9] BE999886 homologue to UniRef100_Q09083 Cluster: Hydroxyproline-rich glycoprotein precursor; n=1; Phaseolus vulgaris|Rep: Hydroxyproline-rich glycoprotein precursor - Phaseolus vulgaris (Kidney bean) (French bean), partial (30%)	AC231338_13.1	Extensin-like region	211	PPPPVYS	7	17	54	193
1	Fabaceae	Medicago	truncatula	TC	BG648728 1 [Medicago truncatula 9] BG648728 homologue to UniRef100_Q09083 Cluster: Hydroxyproline-rich glycoprotein precursor; n=1; Phaseolus vulgaris|Rep: Hydroxyproline-rich glycoprotein precursor - Phaseolus vulgaris (Kidney bean) (French bean), partial (20%)			215	PPPPVYS	7	12	13	114
1	Fabaceae	Medicago	truncatula	TC	CX533180 3 [Medicago truncatula 9] CX533180 homologue to UniRef100_Q09083 Cluster: Hydroxyproline-rich glycoprotein precursor; n=1; Phaseolus vulgaris|Rep: Hydroxyproline-rich glycoprotein precursor - Phaseolus vulgaris (Kidney bean) (French bean), partial (28%)	AC231338_13.1	Extensin-like region	202	PPPPVYS	7	15.71	44	177
1	Solanaceae	Nicotiana	benthamiana	TC	CK286823 2 [Nicotiana benthamiana 3] CK286823 weakly similar to UniRef100_Q3HTK5 Cluster: Pherophorin-C2 protein precursor; n=1; Chlamydomonas reinhardtii|Rep: Pherophorin-C2 protein precursor - Chlamydomonas reinhardtii, partial (31%)			252	PPPPVYS	7	13.14	37	132
1	Brassicaceae	Brassica	napus	TC	TC78294 3 [Brassica napus 3-1] TC78294 similar to UniRef100_Q9FS16 Cluster: Extensin-3 precursor; n=1; Arabidopsis thaliana|Rep: Extensin-3 precursor - Arabidopsis thaliana (Mouse-ear cress), partial (43%)			255	PPPPVYS	7	5.29	133	178
1	Brassicaceae	Brassica	napus	TC	TC98128 3 [Brassica napus 3-1] TC98128 similar to UniRef100_Q9FS16 Cluster: Extensin-3 precursor; n=1; Arabidopsis thaliana|Rep: Extensin-3 precursor - Arabidopsis thaliana (Mouse-ear cress), partial (16%)			254	PPPPVYS	7	5.29	90	135
1	Rutaceae	Citrus	clementina	TC	TC38729 3 [Citrus clementina 2] TC38729 similar to UniRef100_Q41707 Cluster: Extensin class 1 protein precursor; n=2; Vigna unguiculata|Rep: Extensin class 1 protein precursor - Vigna unguiculata (Cowpea), partial (44%)			428	PPPPVYS	7	9.71	96	171
1	Rutaceae	Citrus	reshni	TA	DY306565 2 [Citrus reshni release] DY306565 Extensin precusor [Arabidopsis thaliana (Mouse-ear cress)]			431	PPPPVYS	7	9.71	96	171
1	Fabaceae	Trifolium	pratense	TA	TA219_57577 2 [Trifolium pratense release] TA219_57577			128	PPPPVYS	7	3.71	19	47
1	Brassicaceae	Brassica	rapa	TA	TA2320_3711 1 [Brassica rapa release] TA2320_3711 Extensin [Brassica napus (Rape)]			164	PPPPVYS	7	8.14	1	74
1	Euphorbiaceae	Euphorbia	esula	TC	BI946373 2 [Euphorbia esula 1] BI946373 similar to UniRef100_Q09085 Cluster: Hydroxyproline-rich glycoprotein; n=1; Phaseolus vulgaris|Rep: Hydroxyproline-rich glycoprotein - Phaseolus vulgaris (Kidney bean) (French bean), partial (24%)			88	SPPPPKH	7	2	10	23
1	Fabaceae	Glycine	max	TC	TC291657 1 [Glycine max 14] TC291657 similar to UniRef100_A7NV49 Cluster: Chromosome chr18 scaffold_1, whole genome shotgun sequence; n=1; Vitis vinifera|Rep: Chromosome chr18 scaffold_1, whole genome shotgun sequence - Vitis vinifera (Grape), partial (31%)			216	SPPPPKH	7	3.71	36	63
1	Fabaceae	Glycine	max	TC	TC320064 3 [Glycine max 14] TC320064 homologue to UniRef100_Q09083 Cluster: Hydroxyproline-rich glycoprotein precursor; n=1; Phaseolus vulgaris|Rep: Hydroxyproline-rich glycoprotein precursor - Phaseolus vulgaris (Kidney bean) (French bean), partial (6%)			139	SPPPPKH	7	3.86	0	28
1	Fabaceae	Glycine	max	TC	TC337690 1 [Glycine max 14] TC337690 UniRef100_Q39835 Cluster: Extensin; n=1; Glycine max|Rep: Extensin - Glycine max (Soybean), partial (27%)			142	SPPPPKH	7	9.71	39	114
1	Fabaceae	Glycine	max	TC	TC348297 1 [Glycine max 14] TC348297 homologue to UniRef100_Q39835 Cluster: Extensin; n=1; Glycine max|Rep: Extensin - Glycine max (Soybean), partial (35%)			307	SPPPPKH	7	3.71	19	46
1	Fabaceae	Glycine	max	TC	BQ785281 2 [Glycine max 14] BQ785281 homologue to UniRef100_Q39835 Cluster: Extensin; n=1; Glycine max|Rep: Extensin - Glycine max (Soybean), partial (22%)			141	SPPPPKH	7	2.14	81	95
1	Asteraceae	Helianthus	annuus	TC	TC55930 2 [Helianthus annuus 6] TC55930 similar to UniRef100_Q76KW3 Cluster: Hydroxyproline-rich glycoprotein-2; n=1; Pisum sativum|Rep: Hydroxyproline-rich glycoprotein-2 - Pisum sativum (Garden pea), partial (23%)			184	SPPPPKH	7	2	70	83
1	Asteraceae	Lactuca	sativa	TC	TC23668 1 [Lactuca sativa 3] TC23668 similar to UniRef100_Q40793 Cluster: Tyrosine-rich hydroxyproline-rich glycoprotein; n=1; Petroselinum crispum|Rep: Tyrosine-rich hydroxyproline-rich glycoprotein - Petroselinum crispum (Parsley) (Petroselinum hortense), partial (70%)			208	SPPPPKH	7	2	190	203
1	Asteraceae	Lactuca	sativa	TC	TC24214 1 [Lactuca sativa 3] TC24214 similar to UniRef100_Q40793 Cluster: Tyrosine-rich hydroxyproline-rich glycoprotein; n=1; Petroselinum crispum|Rep: Tyrosine-rich hydroxyproline-rich glycoprotein - Petroselinum crispum (Parsley) (Petroselinum hortense), partial (63%)			227	SPPPPKH	7	2	209	222
1	Asteraceae	Lactuca	serriola	TC	TC3957 2 [Lactuca serriola 1] TC3957 similar to UniRef100_Q40793 Cluster: Tyrosine-rich hydroxyproline-rich glycoprotein; n=1; Petroselinum crispum|Rep: Tyrosine-rich hydroxyproline-rich glycoprotein - Petroselinum crispum (Parsley) (Petroselinum hortense), partial (71%)			231	SPPPPKH	7	2	200	213
1	Rutaceae	Citrus	sinensis	TC	CK740200 1 [Citrus sinensis 1] CK740200 similar to UniRef100_Q09083 Cluster: Hydroxyproline-rich glycoprotein precursor; n=1; Phaseolus vulgaris|Rep: Hydroxyproline-rich glycoprotein precursor - Phaseolus vulgaris (Kidney bean) (French bean), partial (21%)			199	SPPPPKH	7	3.71	13	40
1	Asteraceae	Lactuca	perennis	TA	DW094102 3 [Lactuca perennis release] DW094102 Extensin precusor [Arabidopsis thaliana (Mouse-ear cress)]			277	SPPPPKH	7	2	262	275
1	Apiaceae	Daucus	carota	NR	gi|119711|sp|P06599.1|EXTN_DAUCA RecName: Full=Extensin; Flags: Precursor gi|18343|emb|CAA26632.1| unnamed protein product [Daucus carota] gi|224686|prf||1111211A extensin			306	SPPPPKH	7	3	272	292
1	Brassicaceae	Arabidopsis	thaliana	NR	gi|15222149|ref|NP_175372.1| leucine-rich repeat family protein / extensin family protein [Arabidopsis thaliana] gi|5430752|gb|AAD43152.1|AC007504_7 Hypothetical Protein [Arabidopsis thaliana]	AT1G49490	PEX2	847	PPPPVYS	7	12.71	549	640
1	Brassicaceae	Arabidopsis	thaliana	TC	TC315088 1 [Arabidopsis thaliana 14] TC315088 UniRef100_Q38913 Cluster: Extensin-1 precursor; n=1; Arabidopsis thaliana|Rep: Extensin-1 precursor - Arabidopsis thaliana (Mouse-ear cress), partial (66%)	AT1G76930	EXT1,EXT4	371	PPPPVYKS	8	15.5	40	163
1	Asteraceae	Helianthus	annuus	TC	TC55780 2 [Helianthus annuus 6] TC55780 similar to UniRef100_Q40425 Cluster: RNA-binding gricine-rich protein-1; n=1; Nicotiana sylvestris|Rep: RNA-binding gricine-rich protein-1 - Nicotiana sylvestris (Wood tobacco), partial (28%)			152	PPPPVYKS	8	3.25	126	151
1	Asteraceae	Helianthus	annuus	TC	TC57148 2 [Helianthus annuus 6] TC57148 homologue to UniRef100_Q39949 Cluster: Hydroxyproline-rich protein; n=1; Helianthus annuus|Rep: Hydroxyproline-rich protein - Helianthus annuus (Common sunflower), partial (37%)			191	PPPPVYKS	8	7.62	12	72
1	Asteraceae	Helianthus	annuus	TC	TC57441 3 [Helianthus annuus 6] TC57441 homologue to UniRef100_Q39949 Cluster: Hydroxyproline-rich protein; n=1; Helianthus annuus|Rep: Hydroxyproline-rich protein - Helianthus annuus (Common sunflower), partial (57%)			195	PPPPVYKS	8	17	48	188
1	Asteraceae	Helianthus	annuus	TC	TC57522 3 [Helianthus annuus 6] TC57522 similar to UniRef100_Q39949 Cluster: Hydroxyproline-rich protein; n=1; Helianthus annuus|Rep: Hydroxyproline-rich protein - Helianthus annuus (Common sunflower), partial (37%)			225	PPPPVYKS	8	10.62	133	220
1	Asteraceae	Helianthus	annuus	TC	TC57943 1 [Helianthus annuus 6] TC57943 homologue to UniRef100_Q39949 Cluster: Hydroxyproline-rich protein; n=1; Helianthus annuus|Rep: Hydroxyproline-rich protein - Helianthus annuus (Common sunflower), partial (43%)			223	PPPPVYKS	8	11.25	129	222
1	Asteraceae	Helianthus	annuus	TC	TC58608 1 [Helianthus annuus 6] TC58608 homologue to UniRef100_Q39949 Cluster: Hydroxyproline-rich protein; n=1; Helianthus annuus|Rep: Hydroxyproline-rich protein - Helianthus annuus (Common sunflower), partial (23%)			90	PPPPVYKS	8	5.25	48	89
1	Asteraceae	Helianthus	annuus	TC	TC59006 3 [Helianthus annuus 6] TC59006 homologue to UniRef100_Q39949 Cluster: Hydroxyproline-rich protein; n=1; Helianthus annuus|Rep: Hydroxyproline-rich protein - Helianthus annuus (Common sunflower), partial (28%)			141	PPPPVYKS	8	9	67	140
1	Asteraceae	Helianthus	annuus	TC	TC59789 3 [Helianthus annuus 6] TC59789 similar to UniRef100_Q39949 Cluster: Hydroxyproline-rich protein; n=1; Helianthus annuus|Rep: Hydroxyproline-rich protein - Helianthus annuus (Common sunflower), partial (33%)			161	PPPPVYKS	8	5.62	116	160
1	Asteraceae	Helianthus	annuus	TC	NP524794 1 [Helianthus annuus 6] NP524794 GB|M76546.1|AAA33375.1 hydroxyproline-rich protein			264	PPPPVYKS	8	22.62	52	249
1	Asteraceae	Helianthus	annuus	TC	BQ971793 3 [Helianthus annuus 6] BQ971793 homologue to UniRef100_Q39949 Cluster: Hydroxyproline-rich protein; n=1; Helianthus annuus|Rep: Hydroxyproline-rich protein - Helianthus annuus (Common sunflower), partial (29%)			179	PPPPVYKS	8	6.62	91	143
1	Asteraceae	Lactuca	sativa	TC	TC26031 2 [Lactuca sativa 3] TC26031 similar to UniRef100_Q39949 Cluster: Hydroxyproline-rich protein; n=1; Helianthus annuus|Rep: Hydroxyproline-rich protein - Helianthus annuus (Common sunflower), partial (52%)			210	PPPPVYKS	8	16	68	209
1	Asteraceae	Lactuca	sativa	TC	TC26241 2 [Lactuca sativa 3] TC26241 similar to UniRef100_Q40402 Cluster: Extensin (ext) precursor; n=1; Nicotiana plumbaginifolia|Rep: Extensin (ext) precursor - Nicotiana plumbaginifolia (Leadwort-leaved tobacco), partial (40%)			183	PPPPVYKS	8	9	4	79
1	Asteraceae	Lactuca	sativa	TC	TC26337 2 [Lactuca sativa 3] TC26337 homologue to UniRef100_Q9FS16 Cluster: Extensin-3 precursor; n=1; Arabidopsis thaliana|Rep: Extensin-3 precursor - Arabidopsis thaliana (Mouse-ear cress), partial (19%)			242	PPPPVYKS	8	8.88	167	241
1	Asteraceae	Lactuca	sativa	TC	TC26430 2 [Lactuca sativa 3] TC26430 similar to UniRef100_Q39949 Cluster: Hydroxyproline-rich protein; n=1; Helianthus annuus|Rep: Hydroxyproline-rich protein - Helianthus annuus (Common sunflower), partial (59%)			211	PPPPVYKS	8	10.5	47	134
1	Asteraceae	Lactuca	sativa	TC	TC26430 3 [Lactuca sativa 3] TC26430 similar to UniRef100_Q39949 Cluster: Hydroxyproline-rich protein; n=1; Helianthus annuus|Rep: Hydroxyproline-rich protein - Helianthus annuus (Common sunflower), partial (59%)			210	PPPPVYKS	8	5.75	133	181
1	Asteraceae	Lactuca	sativa	TC	TC26482 1 [Lactuca sativa 3] TC26482 similar to UniRef100_Q39949 Cluster: Hydroxyproline-rich protein; n=1; Helianthus annuus|Rep: Hydroxyproline-rich protein - Helianthus annuus (Common sunflower), partial (72%)			269	PPPPVYKS	8	25.12	55	268
1	Asteraceae	Lactuca	sativa	TC	TC26701 2 [Lactuca sativa 3] TC26701 similar to UniRef100_Q39949 Cluster: Hydroxyproline-rich protein; n=1; Helianthus annuus|Rep: Hydroxyproline-rich protein - Helianthus annuus (Common sunflower), partial (68%)			225	PPPPVYKS	8	13.75	98	224
1	Asteraceae	Lactuca	sativa	TC	TC26719 2 [Lactuca sativa 3] TC26719 similar to UniRef100_Q39599 Cluster: Extensin; n=1; Catharanthus roseus|Rep: Extensin - Catharanthus roseus (Rosy periwinkle) (Madagascar periwinkle), partial (37%)			177	PPPPVYKS	8	6.25	125	176
1	Asteraceae	Lactuca	sativa	TC	TC27418 1 [Lactuca sativa 3] TC27418 similar to UniRef100_Q39949 Cluster: Hydroxyproline-rich protein; n=1; Helianthus annuus|Rep: Hydroxyproline-rich protein - Helianthus annuus (Common sunflower), partial (26%)			157	PPPPVYKS	8	5.88	104	156
1	Asteraceae	Lactuca	sativa	TC	TC27500 2 [Lactuca sativa 3] TC27500 homologue to UniRef100_Q39949 Cluster: Hydroxyproline-rich protein; n=1; Helianthus annuus|Rep: Hydroxyproline-rich protein - Helianthus annuus (Common sunflower), partial (34%)			182	PPPPVYKS	8	10.38	88	181
1	Asteraceae	Lactuca	sativa	TC	TC27580 1 [Lactuca sativa 3] TC27580 similar to UniRef100_Q39949 Cluster: Hydroxyproline-rich protein; n=1; Helianthus annuus|Rep: Hydroxyproline-rich protein - Helianthus annuus (Common sunflower), partial (76%)			289	PPPPVYKS	8	25.75	74	288
1	Asteraceae	Lactuca	sativa	TC	TC27763 1 [Lactuca sativa 3] TC27763 homologue to UniRef100_Q39949 Cluster: Hydroxyproline-rich protein; n=1; Helianthus annuus|Rep: Hydroxyproline-rich protein - Helianthus annuus (Common sunflower), partial (30%)			186	PPPPVYKS	8	8.25	118	185
1	Asteraceae	Lactuca	sativa	TC	TC28362 1 [Lactuca sativa 3] TC28362 similar to UniRef100_Q39949 Cluster: Hydroxyproline-rich protein; n=1; Helianthus annuus|Rep: Hydroxyproline-rich protein - Helianthus annuus (Common sunflower), partial (50%)			181	PPPPVYKS	8	13.38	62	180
1	Asteraceae	Lactuca	sativa	TC	DY962347 1 [Lactuca sativa 3] DY962347 similar to UniRef100_Q39949 Cluster: Hydroxyproline-rich protein; n=1; Helianthus annuus|Rep: Hydroxyproline-rich protein - Helianthus annuus (Common sunflower), partial (45%)			227	PPPPVYKS	8	14.88	103	225
1	Rosaceae	Malus	domestica	TC	TC42875 3 [Malus domestica x] TC42875 similar to UniRef100_A4QMB9 Cluster: ORF124; n=1; Pinus koraiensis|Rep: ORF124 - Pinus koraiensis (Korean pine), complete			396	PPPPVYKS	8	2.38	162	180
1	Brassicaceae	Arabidopsis	thaliana	TC	NP044388 1 [Arabidopsis thaliana 14] NP044388 GB|U43627.1|AAA85899.1 extensin	AT1G76930	EXT1,EXT4	285	PPPPVYKS	8	9.5	66	141
1	Brassicaceae	Arabidopsis	thaliana	TC	NP1663140 1 [Arabidopsis thaliana 14] NP1663140 GB|NM_179564.1|NP_849895.1 ATEXT4 (EXTENSIN 4);Identical to Extensin-1 precursor (AtExt1) (AtExt4) (EXT1) [Arabidopsis Thaliana] (GB:Q38913;GB:Q9FS15;GB:Q9SAW2); similar to ATEXT3 (EXTENSIN 3), structural constituent of cell wall [Arabidopsis thaliana] (TAIR:AT1G21310.1); similar t	AT1G76930	EXT1,EXT4	353	PPPPVYKS	8	13.38	40	146
1	Brassicaceae	Arabidopsis	thaliana	TC	AV550174 1 [Arabidopsis thaliana 14] AV550174 homologue to UniRef100_Q304C4 Cluster: Uncharacterized protein At1g76930.2; n=1; Arabidopsis thaliana|Rep: Uncharacterized protein At1g76930.2 - Arabidopsis thaliana (Mouse-ear cress), partial (47%)	AT1G76930	EXT1,EXT4	125	PPPPVYKS	8	8	58	124
1	Brassicaceae	Arabidopsis	thaliana	TC	AV554071 1 [Arabidopsis thaliana 14] AV554071 homologue to UniRef100_Q304C4 Cluster: Uncharacterized protein At1g76930.2; n=1; Arabidopsis thaliana|Rep: Uncharacterized protein At1g76930.2 - Arabidopsis thaliana (Mouse-ear cress), partial (59%)	AT1G76930	EXT1,EXT4	154	PPPPVYKS	8	9.25	31	108
1	Brassicaceae	Arabidopsis	thaliana	TC	AV554071 1 [Arabidopsis thaliana 14] AV554071 homologue to UniRef100_Q304C4 Cluster: Uncharacterized protein At1g76930.2; n=1; Arabidopsis thaliana|Rep: Uncharacterized protein At1g76930.2 - Arabidopsis thaliana (Mouse-ear cress), partial (59%)	AT1G76930	EXT1,EXT4	154	PPPPVYKS	8	6.5	89	140
1	Brassicaceae	Arabidopsis	thaliana	TC	EG515673 3 [Arabidopsis thaliana 14] EG515673 UniRef100_Q304C4 Cluster: Uncharacterized protein At1g76930.2; n=1; Arabidopsis thaliana|Rep: Uncharacterized protein At1g76930.2 - Arabidopsis thaliana (Mouse-ear cress), partial (40%)	AT1G76930	EXT1,EXT4	117	PPPPVYKS	8	6	65	112
1	Brassicaceae	Arabidopsis	thaliana	TC	EL306407 3 [Arabidopsis thaliana 14] EL306407 homologue to UniRef100_Q304C4 Cluster: Uncharacterized protein At1g76930.2; n=1; Arabidopsis thaliana|Rep: Uncharacterized protein At1g76930.2 - Arabidopsis thaliana (Mouse-ear cress), partial (17%)			45	PPPPVYKS	8	2	9	24
1	Brassicaceae	Arabidopsis	thaliana	TC	EH864472 3 [Arabidopsis thaliana 14] EH864472 homologue to UniRef100_Q304C4 Cluster: Uncharacterized protein At1g76930.2; n=1; Arabidopsis thaliana|Rep: Uncharacterized protein At1g76930.2 - Arabidopsis thaliana (Mouse-ear cress), partial (17%)			46	PPPPVYKS	8	4.5	9	44
1	Brassicaceae	Arabidopsis	thaliana	TC	EL167839 1 [Arabidopsis thaliana 14] EL167839 UniRef100_Q38913 Cluster: Extensin-1 precursor; n=1; Arabidopsis thaliana|Rep: Extensin-1 precursor - Arabidopsis thaliana (Mouse-ear cress), partial (10%)			42	PPPPVYKS	8	4.12	0	32
1	Brassicaceae	Brassica	napus	TC	TC65850 2 [Brassica napus 3-1] TC65850 similar to UniRef100_Q9FS16 Cluster: Extensin-3 precursor; n=1; Arabidopsis thaliana|Rep: Extensin-3 precursor - Arabidopsis thaliana (Mouse-ear cress), partial (41%)			242	PPPPVYKS	8	15.88	0	137
1	Brassicaceae	Brassica	napus	TC	TC64179 2 [Brassica napus 3-1] TC64179 similar to UniRef100_Q9FS16 Cluster: Extensin-3 precursor; n=1; Arabidopsis thaliana|Rep: Extensin-3 precursor - Arabidopsis thaliana (Mouse-ear cress), partial (47%)			313	PPPPVYKS	8	11.5	59	165
1	Brassicaceae	Brassica	napus	TC	TC73335 2 [Brassica napus 3-1] TC73335 similar to UniRef100_A7P2L6 Cluster: Chromosome chr1 scaffold_5, whole genome shotgun sequence; n=1; Vitis vinifera|Rep: Chromosome chr1 scaffold_5, whole genome shotgun sequence - Vitis vinifera (Grape), partial (58%)			588	PPPPVYKS	8	8.62	231	309
1	Brassicaceae	Brassica	napus	TC	TC78294 2 [Brassica napus 3-1] TC78294 similar to UniRef100_Q9FS16 Cluster: Extensin-3 precursor; n=1; Arabidopsis thaliana|Rep: Extensin-3 precursor - Arabidopsis thaliana (Mouse-ear cress), partial (43%)			255	PPPPVYKS	8	2.88	103	125
1	Brassicaceae	Brassica	napus	TC	TC84948 2 [Brassica napus 3-1] TC84948 similar to UniRef100_Q9FS16 Cluster: Extensin-3 precursor; n=1; Arabidopsis thaliana|Rep: Extensin-3 precursor - Arabidopsis thaliana (Mouse-ear cress), partial (49%)			326	PPPPVYKS	8	8.62	109	187
1	Brassicaceae	Brassica	napus	TC	TC88120 3 [Brassica napus 3-1] TC88120 similar to UniRef100_Q9FS16 Cluster: Extensin-3 precursor; n=1; Arabidopsis thaliana|Rep: Extensin-3 precursor - Arabidopsis thaliana (Mouse-ear cress), partial (52%)			379	PPPPVYKS	8	2.88	102	124
1	Brassicaceae	Brassica	napus	TC	TC88120 3 [Brassica napus 3-1] TC88120 similar to UniRef100_Q9FS16 Cluster: Extensin-3 precursor; n=1; Arabidopsis thaliana|Rep: Extensin-3 precursor - Arabidopsis thaliana (Mouse-ear cress), partial (52%)			379	PPPPVYKS	8	8.62	158	236
1	Brassicaceae	Brassica	napus	TC	TC97111 1 [Brassica napus 3-1] TC97111 similar to UniRef100_Q9FS16 Cluster: Extensin-3 precursor; n=1; Arabidopsis thaliana|Rep: Extensin-3 precursor - Arabidopsis thaliana (Mouse-ear cress), partial (25%)			330	PPPPVYKS	8	5.25	119	165
1	Brassicaceae	Brassica	napus	TC	TC97191 3 [Brassica napus 3-1] TC97191 homologue to UniRef100_Q2A9D1 Cluster: Extensin-like region containing protein; n=1; Brassica oleracea|Rep: Extensin-like region containing protein - Brassica oleracea (Wild cabbage), partial (36%)			355	PPPPVYKS	8	11.88	91	195
1	Brassicaceae	Brassica	napus	TC	ES911013 1 [Brassica napus 3-1] ES911013 similar to UniRef100_Q9FS16 Cluster: Extensin-3 precursor; n=1; Arabidopsis thaliana|Rep: Extensin-3 precursor - Arabidopsis thaliana (Mouse-ear cress), partial (16%)			177	PPPPVYKS	8	3.12	46	70
1	Brassicaceae	Brassica	napus	TC	EE433992 3 [Brassica napus 3-1] EE433992 similar to UniRef100_Q9FS16 Cluster: Extensin-3 precursor; n=1; Arabidopsis thaliana|Rep: Extensin-3 precursor - Arabidopsis thaliana (Mouse-ear cress), partial (29%)			208	PPPPVYKS	8	9	52	132
1	Brassicaceae	Brassica	napus	TC	ES910362 2 [Brassica napus 3-1] ES910362 similar to UniRef100_Q9FS16 Cluster: Extensin-3 precursor; n=1; Arabidopsis thaliana|Rep: Extensin-3 precursor - Arabidopsis thaliana (Mouse-ear cress), partial (46%)			287	PPPPVYKS	8	3.12	46	70
1	Brassicaceae	Brassica	napus	TC	ES910362 2 [Brassica napus 3-1] ES910362 similar to UniRef100_Q9FS16 Cluster: Extensin-3 precursor; n=1; Arabidopsis thaliana|Rep: Extensin-3 precursor - Arabidopsis thaliana (Mouse-ear cress), partial (46%)			287	PPPPVYKS	8	8.62	88	166
1	Brassicaceae	Brassica	napus	TC	ES902262 1 [Brassica napus 3-1] ES902262 similar to UniRef100_Q9FS16 Cluster: Extensin-3 precursor; n=1; Arabidopsis thaliana|Rep: Extensin-3 precursor - Arabidopsis thaliana (Mouse-ear cress), partial (20%)			252	PPPPVYKS	8	8.5	174	251
1	Brassicaceae	Brassica	napus	TC	EV115662 3 [Brassica napus 3-1] EV115662 similar to UniRef100_Q39949 Cluster: Hydroxyproline-rich protein; n=1; Helianthus annuus|Rep: Hydroxyproline-rich protein - Helianthus annuus (Common sunflower), partial (38%)			154	PPPPVYKS	8	5.75	96	146
1	Asteraceae	Helianthus	argophyllus	TA	CF087035 1 [Helianthus argophyllus release] CF087035 Extensin precusor [Arabidopsis thaliana (Mouse-ear cress)]			176	PPPPVYKS	8	5.62	11	55
1	Asteraceae	Helianthus	ciliaris	TA	EL432714 1 [Helianthus ciliaris release] EL432714 Cluster: Extensin-1 precursor; n=1; Arabidopsis thaliana|Rep: Extensin-1 precursor - Arabidopsis thaliana (Mouse-ear cress)			171	PPPPVYKS	8	6.62	26	80
1	Asteraceae	Lactuca	perennis	TA	TA1913_43195 3 [Lactuca perennis release] TA1913_43195 Extensin precusor [Arabidopsis thaliana (Mouse-ear cress)]			272	PPPPVYKS	8	17.5	65	220
1	Asteraceae	Lactuca	perennis	TA	DW089124 2 [Lactuca perennis release] DW089124 Extensin precusor [Arabidopsis thaliana (Mouse-ear cress)]			243	PPPPVYKS	8	6.88	37	97
1	Asteraceae	Lactuca	perennis	TA	DW089124 3 [Lactuca perennis release] DW089124 Extensin precusor [Arabidopsis thaliana (Mouse-ear cress)]			242	PPPPVYKS	8	3.38	99	126
1	Asteraceae	Lactuca	perennis	TA	DW093903 1 [Lactuca perennis release] DW093903 Extensin precusor [Arabidopsis thaliana (Mouse-ear cress)]			242	PPPPVYKS	8	11	64	159
1	Asteraceae	Lactuca	saligna	TA	TA1819_75948 3 [Lactuca saligna release] TA1819_75948 Extensin precusor [Arabidopsis thaliana (Mouse-ear cress)]			267	PPPPVYKS	8	26.88	46	265
1	Asteraceae	Lactuca	saligna	TA	DW045484 3 [Lactuca saligna release] DW045484 Extensin precusor [Arabidopsis thaliana (Mouse-ear cress)]			158	PPPPVYKS	8	5	63	106
1	Asteraceae	Lactuca	saligna	TA	DW064586 3 [Lactuca saligna release] DW064586 Extensin precusor [Arabidopsis thaliana (Mouse-ear cress)]			225	PPPPVYKS	8	18.88	62	224
1	Asteraceae	Lactuca	saligna	TA	DW073879 1 [Lactuca saligna release] DW073879 Extensin precusor [Arabidopsis thaliana (Mouse-ear cress)]			226	PPPPVYKS	8	18	64	216
1	Asteraceae	Lactuca	virosa	TA	TA4472_75947 1 [Lactuca virosa release] TA4472_75947 Extensin precusor [Arabidopsis thaliana (Mouse-ear cress)]			276	PPPPVYKS	8	20.5	64	236
1	Asteraceae	Lactuca	virosa	TA	TA4472_75947 2 [Lactuca virosa release] TA4472_75947 Extensin precusor [Arabidopsis thaliana (Mouse-ear cress)]			276	PPPPVYKS	8	2	242	257
1	Asteraceae	Lactuca	virosa	TA	DW165727 1 [Lactuca virosa release] DW165727 Extensin precusor [Arabidopsis thaliana (Mouse-ear cress)]			201	PPPPVYKS	8	7.88	136	200
1	Asteraceae	Lactuca	virosa	TA	DW165727 2 [Lactuca virosa release] DW165727 Extensin precusor [Arabidopsis thaliana (Mouse-ear cress)]			201	PPPPVYKS	8	3.5	71	98
1	Asteraceae	Stevia	rebaudiana	TA	BG521835 2 [Stevia rebaudiana release] BG521835 Extensin precusor [Arabidopsis thaliana (Mouse-ear cress)]			145	PPPPVYKS	8	16.88	0	141
1	Asteraceae	Stevia	rebaudiana	TA	BG526369 1 [Stevia rebaudiana release] BG526369 Extensin precusor [Arabidopsis thaliana (Mouse-ear cress)]			186	PPPPVYKS	8	9.12	0	78
1	Brassicaceae	Thellungiella	salsuginea	TA	DN777975 2 [Thellungiella salsuginea release] DN777975 Extensin [Brassica napus (Rape)]			187	PPPPVYKS	8	2.88	143	165
1	Brassicaceae	Brassica	oleracea	TA	TA1913_3712 2 [Brassica oleracea release] TA1913_3712 Extensin [Brassica napus (Rape)]			250	PPPPVYKS	8	3.5	102	129
1	Brassicaceae	Brassica	oleracea	TA	TA1914_3712 1 [Brassica oleracea release] TA1914_3712 Extensin [Brassica napus (Rape)]			278	PPPPVYKS	8	11.88	21	129
1	Brassicaceae	Brassica	oleracea	TA	TA1915_3712 2 [Brassica oleracea release] TA1915_3712 Myosin heavy chain [Arabidopsis thaliana (Mouse-ear cress)]			320	PPPPVYKS	8	2.88	297	319
1	Brassicaceae	Brassica	oleracea	TA	AM389290 1 [Brassica oleracea release] AM389290 Extensin [Brassica napus (Rape)]			195	PPPPVYKS	8	9.38	81	164
1	Brassicaceae	Brassica	rapa	TA	TA2321_3711 1 [Brassica rapa release] TA2321_3711 Extensin [Brassica napus (Rape)]			279	PPPPVYKS	8	5.75	214	264
1	Brassicaceae	Brassica	rapa	TA	BG544137 3 [Brassica rapa release] BG544137 Extensin [Brassica napus (Rape)]			156	PPPPVYKS	8	8.62	8	86
1	Brassicaceae	Brassica	rapa	TA	BQ791180 2 [Brassica rapa release] BQ791180 Extensin [Brassica napus (Rape)]			179	PPPPVYKS	8	5.75	109	159
1	Brassicaceae	Brassica	rapa	TA	BQ791645 3 [Brassica rapa release] BQ791645 Extensin [Brassica napus (Rape)]			118	PPPPVYKS	8	8.62	7	85
1	Brassicaceae	Brassica	rapa	TA	CV544562 2 [Brassica rapa release] CV544562 Extensin [Brassica napus (Rape)]			169	PPPPVYKS	8	7.88	78	150
1	Brassicaceae	Brassica	rapa	TA	CV544607 3 [Brassica rapa release] CV544607 Extensin [Brassica napus (Rape)]			202	PPPPVYKS	8	11.5	12	118
1	Brassicaceae	Brassica	rapa	TA	CV545714 1 [Brassica rapa release] CV545714 Extensin [Brassica napus (Rape)]			107	PPPPVYKS	8	3.12	48	72
1	Asteraceae	Helianthus	annuus	TC	TC48945 1 [Helianthus annuus 6] TC48945			220	PPPPVYHS	8	18.38	61	216
1	Brassicaceae	Arabidopsis	thaliana	TC	CF652811 3 [Arabidopsis thaliana 14] CF652811 homologue to UniRef100_Q38913 Cluster: Extensin-1 precursor; n=1; Arabidopsis thaliana|Rep: Extensin-1 precursor - Arabidopsis thaliana (Mouse-ear cress), partial (22%)			183	PPPPVYHS	8	3.38	8	34
1	Brassicaceae	Arabidopsis	thaliana	TC	AV540230 3 [Arabidopsis thaliana 14] AV540230 homologue to UniRef100_Q38913 Cluster: Extensin-1 precursor; n=1; Arabidopsis thaliana|Rep: Extensin-1 precursor - Arabidopsis thaliana (Mouse-ear cress), partial (25%)			148	PPPPVYHS	8	3.75	51	80
1	Brassicaceae	Arabidopsis	thaliana	TC	CF652812 3 [Arabidopsis thaliana 14] CF652812 homologue to UniRef100_Q38913 Cluster: Extensin-1 precursor; n=1; Arabidopsis thaliana|Rep: Extensin-1 precursor - Arabidopsis thaliana (Mouse-ear cress), partial (22%)			183	PPPPVYHS	8	3.38	8	34
1	Rosaceae	Prunus	persica	TC	TC11801 3 [Prunus persica 2] TC11801 weakly similar to UniRef100_Q3HTK5 Cluster: Pherophorin-C2 protein precursor; n=1; Chlamydomonas reinhardtii|Rep: Pherophorin-C2 protein precursor - Chlamydomonas reinhardtii, partial (27%)			354	PPPPVYHS	8	2.5	6	25
1	Solanaceae	Solanum	lycopersicum	TC	TC197827 2 [Solanum lycopersicum 12] TC197827 similar to UniRef100_A3KD20 Cluster: Leucine-rich repeat/extensin; n=1; Nicotiana plumbaginifolia|Rep: Leucine-rich repeat/extensin - Nicotiana plumbaginifolia (Leadwort-leaved tobacco), partial (67%)			614	PPPPVYHS	8	2.5	494	513
1	Solanaceae	Solanum	lycopersicum	TC	TC208573 1 [Solanum lycopersicum 12] TC208573 UniRef100_Q09084 Cluster: Extensin (Class II) precursor; n=2; Solanum lycopersicum|Rep: Extensin (Class II) precursor - Solanum lycopersicum (Tomato) (Lycopersicon esculentum), complete			371	PPPPVYHS	8	2.5	102	121
1	Solanaceae	Solanum	tuberosum	TC	TC177232 3 [Solanum tuberosum 12] TC177232 homologue to UniRef100_Q09084 Cluster: Extensin (Class II) precursor; n=2; Solanum lycopersicum|Rep: Extensin (Class II) precursor - Solanum lycopersicum (Tomato) (Lycopersicon esculentum), partial (54%)			230	PPPPVYHS	8	2	113	128
1	Brassicaceae	Brassica	napus	TC	TC92416 1 [Brassica napus 3-1] TC92416 homologue to UniRef100_Q9FS16 Cluster: Extensin-3 precursor; n=1; Arabidopsis thaliana|Rep: Extensin-3 precursor - Arabidopsis thaliana (Mouse-ear cress), partial (15%)			162	PPPPVYHS	8	3.88	0	30
1	Brassicaceae	Brassica	napus	TC	TC90743 2 [Brassica napus 3-1] TC90743 similar to UniRef100_Q38913 Cluster: Extensin-1 precursor; n=1; Arabidopsis thaliana|Rep: Extensin-1 precursor - Arabidopsis thaliana (Mouse-ear cress), partial (18%)			189	PPPPVYHS	8	4.75	13	53
1	Brassicaceae	Brassica	napus	TC	TC104149 1 [Brassica napus 3-1] TC104149 similar to UniRef100_Q9FS16 Cluster: Extensin-3 precursor; n=1; Arabidopsis thaliana|Rep: Extensin-3 precursor - Arabidopsis thaliana (Mouse-ear cress), partial (39%)			276	PPPPVYHS	8	10.88	7	111
1	Brassicaceae	Brassica	napus	TC	TC104149 1 [Brassica napus 3-1] TC104149 similar to UniRef100_Q9FS16 Cluster: Extensin-3 precursor; n=1; Arabidopsis thaliana|Rep: Extensin-3 precursor - Arabidopsis thaliana (Mouse-ear cress), partial (39%)			276	PPPPVYHS	8	3.75	119	151
1	Brassicaceae	Brassica	napus	TC	ES912890 1 [Brassica napus 3-1] ES912890 similar to UniRef100_Q9FS16 Cluster: Extensin-3 precursor; n=1; Arabidopsis thaliana|Rep: Extensin-3 precursor - Arabidopsis thaliana (Mouse-ear cress), partial (32%)			242	PPPPVYHS	8	5.75	46	96
1	Rutaceae	Citrus	reticulata	TA	TA934_85571 1 [Citrus reticulata release] TA934_85571 Expressed protein [Oryza sativa (japonica cultivar-group)]			490	PPPPVYHS	8	2	3	18
1	Fabaceae	Pisum	sativum	TA	TA540_3888 1 [Pisum sativum release] TA540_3888 Extensin [Brassica napus (Rape)]			223	PPPPVYHS	8	3	91	116
1	Fabaceae	Pisum	sativum	TA	AF397032 1 [Pisum sativum release] AF397032			231	PPPPVYHS	8	3	108	133
1	Brassicaceae	Thlaspi	caerulescens	TA	DN925223 3 [Thlaspi caerulescens release] DN925223			55	PPPPVYHS	8	2.62	4	24
1	Brassicaceae	Brassica	oleracea	TA	TA4049_3712 3 [Brassica oleracea release] TA4049_3712 Extensin [Brassica napus (Rape)]			262	PPPPVYHS	8	5.5	37	85
1	Brassicaceae	Arabidopsis	thaliana	NR	gi|12248386|dbj|BAB20085.1| extensin 4 [Arabidopsis thaliana]	AT1G76930	EXT1,EXT4	246	PPPPVYKS	8	13.38	26	132
1	Brassicaceae	Arabidopsis	thaliana	NR	gi|21263615|sp|Q38913.2|EXTN1_ARATH RecName: Full=Extensin-1; Short=AtExt1; Short=AtExt4; Flags: Precursor gi|2829922|gb|AAC00630.1| extensin [Arabidopsis thaliana]	AT1G76930	EXT1,EXT4	373	PPPPVYKS	8	13.38	26	132
1	Brassicaceae	Arabidopsis	thaliana	NR	gi|21263615|sp|Q38913.2|EXTN1_ARATH RecName: Full=Extensin-1; Short=AtExt1; Short=AtExt4; Flags: Precursor gi|2829922|gb|AAC00630.1| extensin [Arabidopsis thaliana]	AT1G76930	EXT1,EXT4	373	PPPPVYKS	8	13.5	122	229
1	Brassicaceae	Arabidopsis	thaliana	NR	gi|18411288|ref|NP_565143.1| ATEXT4 (EXTENSIN 4); structural constituent of cell wall [Arabidopsis thaliana]	AT1G76930	EXT1,EXT4	256	PPPPVYKS	8	13.38	30	136
1	Brassicaceae	Arabidopsis	thaliana	NR	gi|30699212|ref|NP_849895.1| ATEXT4 (EXTENSIN 4); structural constituent of cell wall [Arabidopsis thaliana]	AT1G76930	EXT1,EXT4	293	PPPPVYKS	8	13.38	30	136
1	Fabaceae	Pisum	sativum	NR	gi|15021752|gb|AAK77903.1|AF397031_1 root nodule extensin [Pisum sativum]			120	PPPPVYHS	8	3	91	116
1	Fabaceae	Pisum	sativum	NR	gi|15021754|gb|AAK77904.1|AF397032_1 root nodule extensin [Pisum sativum]			137	PPPPVYHS	8	3	108	133
1	Fabaceae	Glycine	max	TC	TC283611 1 [Glycine max 14] TC283611 UniRef100_Q39835 Cluster: Extensin; n=1; Glycine max|Rep: Extensin - Glycine max (Soybean), complete			541	PPPPYKYHS	9	42.33	33	429
1	Fabaceae	Glycine	max	TC	TC327171 1 [Glycine max 14] TC327171 homologue to UniRef100_Q39835 Cluster: Extensin; n=1; Glycine max|Rep: Extensin - Glycine max (Soybean), partial (39%)			182	PPPPYKYHS	9	8.89	41	125
1	Fabaceae	Glycine	max	TC	TC344635 3 [Glycine max 14] TC344635 UniRef100_Q39835 Cluster: Extensin; n=1; Glycine max|Rep: Extensin - Glycine max (Soybean), partial (31%)			169	PPPPYKYHS	9	10.44	30	126
1	Fabaceae	Phaseolus	vulgaris	TC	TC19108 1 [Phaseolus vulgaris 3] TC19108 UniRef100_Q09083 Cluster: Hydroxyproline-rich glycoprotein precursor; n=1; Phaseolus vulgaris|Rep: Hydroxyproline-rich glycoprotein precursor - Phaseolus vulgaris (Kidney bean) (French bean), complete			581	PPPPYKYHS	9	56.33	45	577
1	Fabaceae	Medicago	truncatula	TC	TC132428 2 [Medicago truncatula 9] TC132428 similar to UniRef100_Q09083 Cluster: Hydroxyproline-rich glycoprotein precursor; n=1; Phaseolus vulgaris|Rep: Hydroxyproline-rich glycoprotein precursor - Phaseolus vulgaris (Kidney bean) (French bean), partial (45%)	AC231338_13.1	Extensin-like region	403	PPPPVYKYS	9	26.78	46	299
1	Casuarinaceae	Casuarina	glauca	TA	CO037051 2 [Casuarina glauca release] CO037051 Extensin [Brassica napus (Rape)]			100	PPPYMYKSP	9	5.89	46	99
1	Rutaceae	Citrus	clementina	TC	TC42492 2 [Citrus clementina 2] TC42492 similar to UniRef100_Q9FS16 Cluster: Extensin-3 precursor; n=1; Arabidopsis thaliana|Rep: Extensin-3 precursor - Arabidopsis thaliana (Mouse-ear cress), partial (19%)			358	PPTPVYHSP	9	4.44	8	48
1	Rutaceae	Citrus	sinensis	TC	TC14423 3 [Citrus sinensis 1] TC14423 homologue to UniRef100_Q06802 Cluster: Extensin; n=1; Nicotiana tabacum|Rep: Extensin - Nicotiana tabacum (Common tobacco), partial (33%)			277	PPTPVYHSP	9	2	0	17
1	Rutaceae	Citrus	sinensis	TC	TC24361 3 [Citrus sinensis 1] TC24361 similar to UniRef100_Q40402 Cluster: Extensin (ext) precursor; n=1; Nicotiana plumbaginifolia|Rep: Extensin (ext) precursor - Nicotiana plumbaginifolia (Leadwort-leaved tobacco), partial (30%)			611	PPTPVYHSP	9	9.22	62	151
1	Rutaceae	Citrus	sinensis	TC	CN189006 1 [Citrus sinensis 1] CN189006 similar to UniRef100_Q06802 Cluster: Extensin; n=1; Nicotiana tabacum|Rep: Extensin - Nicotiana tabacum (Common tobacco), partial (59%)			214	PPTPVYHSP	9	7	2	68
1	Brassicaceae	Arabidopsis	thaliana	TC	TC323860 1 [Arabidopsis thaliana 14] TC323860	AT1G26240	EXT19	479	PPPYVYKSPP	10	44.3	30	475
1	Rosaceae	Malus	domestica	TC	TC49978 2 [Malus domestica x] TC49978 similar to UniRef100_A7NU80 Cluster: Chromosome chr18 scaffold_1, whole genome shotgun sequence; n=1; Vitis vinifera|Rep: Chromosome chr18 scaffold_1, whole genome shotgun sequence - Vitis vinifera (Grape), partial (53%)			488	PPPYVYKSPP	10	4.2	81	122
1	Brassicaceae	Arabidopsis	thaliana	TC	NP032210 1 [Arabidopsis thaliana 14] NP032210 GB|AL109819.1|CAB52559.1 extensin-like protein	AT4G08370	EXT20	351	PPPYVYKSPP	10	9	33	124
1	Brassicaceae	Arabidopsis	thaliana	TC	NP190266 1 [Arabidopsis thaliana 14] NP190266 GB|AL161511.2|CAB77962.1 extensin-like protein	AT4G08370	EXT20	351	PPPYVYKSPP	10	9	33	124
1	Brassicaceae	Arabidopsis	thaliana	TC	NP2706781 1 [Arabidopsis thaliana 14] NP2706781 GB|NM_116906.1|NP_192577.1 proline-rich extensin-like family protein;similar to proline-rich extensin-like family protein [Arabidopsis thaliana] (TAIR:AT1G26240.1); similar to hydroxyproline-rich glycoprotein precursor (GB:AAA87902.1); contains InterPro domain Extensin-like region;	AT4G08370	EXT20	351	PPPYVYKSPP	10	9	33	124
1	Fabaceae	Medicago	truncatula	TC	TC134354 1 [Medicago truncatula 9] TC134354			408	PPPYVYKSPP	10	16.1	125	289
1	Fabaceae	Medicago	truncatula	TC	TC134354 2 [Medicago truncatula 9] TC134354			408	PPPYVYKSPP	10	8	22	109
1	Orobanchaceae	Triphysaria	pusilla	TC	TC12301 2 [Triphysaria pusilla NoSp] TC12301 similar to UniRef100_Q1KV12 Cluster: Sinapyl alcohol dehydrogenase; n=1; Nicotiana tabacum|Rep: Sinapyl alcohol dehydrogenase - Nicotiana tabacum (Common tobacco), partial (20%)			151	PPPYVYKSPP	10	4.4	80	123
1	Orobanchaceae	Triphysaria	pusilla	TC	TC15168 3 [Triphysaria pusilla NoSp] TC15168			169	PPPYVYKSPP	10	5.7	0	64
1	Orobanchaceae	Triphysaria	pusilla	TC	EX995043 1 [Triphysaria pusilla NoSp] EX995043 similar to UniRef100_Q43682 Cluster: Extensin-like protein; n=1; Vigna unguiculata|Rep: Extensin-like protein - Vigna unguiculata (Cowpea), partial (30%)			208	PPPYVYKSPP	10	5.9	1	67
1	Orobanchaceae	Triphysaria	versicolor	TC	TC5616 2 [Triphysaria versicolor 2] TC5616 similar to UniRef100_Q1KV12 Cluster: Sinapyl alcohol dehydrogenase; n=1; Nicotiana tabacum|Rep: Sinapyl alcohol dehydrogenase - Nicotiana tabacum (Common tobacco), partial (20%)			151	PPPYVYKSPP	10	4.4	80	123
1	Orobanchaceae	Triphysaria	versicolor	TC	TC7901 3 [Triphysaria versicolor 2] TC7901			278	PPPYVYKSPP	10	9.7	61	173
1	Orobanchaceae	Triphysaria	versicolor	TC	TC7029 1 [Triphysaria versicolor 2] TC7029 similar to UniRef100_Q9STN1 Cluster: Extensin-like protein; n=1; Arabidopsis thaliana|Rep: Extensin-like protein - Arabidopsis thaliana (Mouse-ear cress), partial (20%)			177	PPPYVYKSPP	10	5.9	1	67
1	Orobanchaceae	Triphysaria	versicolor	TC	EX995043 1 [Triphysaria versicolor 2] EX995043 similar to UniRef100_Q43682 Cluster: Extensin-like protein; n=1; Vigna unguiculata|Rep: Extensin-like protein - Vigna unguiculata (Cowpea), partial (30%)			208	PPPYVYKSPP	10	5.9	1	67
1	Brassicaceae	Brassica	napus	TC	TC85524 3 [Brassica napus 3-1] TC85524			196	PPPYVYKSPP	10	11.2	2	115
1	Fabaceae	Trifolium	pratense	TA	TA82_57577 1 [Trifolium pratense release] TA82_57577 Extensin precusor [Arabidopsis thaliana (Mouse-ear cress)]			266	PPPYVYKSPP	10	22.1	37	265
1	Fabaceae	Trifolium	pratense	TA	TA88_57577 3 [Trifolium pratense release] TA88_57577 Extensin precusor [Arabidopsis thaliana (Mouse-ear cress)]			191	PPPYVYKSPP	10	9.4	96	189
1	Fabaceae	Trifolium	pratense	TA	TA156_57577 1 [Trifolium pratense release] TA156_57577 Extensin precusor [Arabidopsis thaliana (Mouse-ear cress)]			180	PPPYVYKSPP	10	13	1	138
1	Fabaceae	Trifolium	pratense	TA	TA185_57577 2 [Trifolium pratense release] TA185_57577 Extensin precusor [Arabidopsis thaliana (Mouse-ear cress)]			253	PPPYVYKSPP	10	5.4	40	93
1	Fabaceae	Trifolium	pratense	TA	TA192_57577 1 [Trifolium pratense release] TA192_57577 Extensin precusor [Arabidopsis thaliana (Mouse-ear cress)]			203	PPPYVYKSPP	10	10.7	95	201
1	Fabaceae	Trifolium	pratense	TA	TA255_57577 3 [Trifolium pratense release] TA255_57577 Extensin precusor [Arabidopsis thaliana (Mouse-ear cress)]			144	PPPYVYKSPP	10	10.9	35	143
1	Fabaceae	Trifolium	pratense	TA	TA265_57577 3 [Trifolium pratense release] TA265_57577 Extensin precusor [Arabidopsis thaliana (Mouse-ear cress)]			397	PPPYVYKSPP	10	7.3	318	394
1	Fabaceae	Trifolium	pratense	TA	TA320_57577 2 [Trifolium pratense release] TA320_57577 Extensin precusor [Arabidopsis thaliana (Mouse-ear cress)]			264	PPPYVYKSPP	10	20	43	257
1	Fabaceae	Trifolium	pratense	TA	TA358_57577 2 [Trifolium pratense release] TA358_57577 Cytochrome P450 like_TBP [Nicotiana tabacum (Common tobacco)]			210	PPPYVYKSPP	10	4.3	140	182
1	Fabaceae	Trifolium	pratense	TA	TA770_57577 3 [Trifolium pratense release] TA770_57577 Extensin precusor [Arabidopsis thaliana (Mouse-ear cress)]			188	PPPYVYKSPP	10	8.3	102	185
1	Fabaceae	Trifolium	pratense	TA	TA1839_57577 1 [Trifolium pratense release] TA1839_57577 Extensin precusor [Arabidopsis thaliana (Mouse-ear cress)]			328	PPPYVYKSPP	10	7.3	252	325
1	Fabaceae	Trifolium	pratense	TA	BB929647 2 [Trifolium pratense release] BB929647 Extensin precusor [Arabidopsis thaliana (Mouse-ear cress)]			174	PPPYVYKSPP	10	6.9	98	171
1	Fabaceae	Trifolium	pratense	TA	BB929942 1 [Trifolium pratense release] BB929942 Extensin precusor [Arabidopsis thaliana (Mouse-ear cress)]			172	PPPYVYKSPP	10	10	37	144
1	Fabaceae	Trifolium	pratense	TA	BB930158 1 [Trifolium pratense release] BB930158 Extensin precusor [Arabidopsis thaliana (Mouse-ear cress)]			290	PPPYVYKSPP	10	12.2	36	158
1	Fabaceae	Trifolium	pratense	TA	BB930158 1 [Trifolium pratense release] BB930158 Extensin precusor [Arabidopsis thaliana (Mouse-ear cress)]			290	PPPYVYKSPP	10	8.7	67	154
1	Fabaceae	Trifolium	pratense	TA	BB930223 3 [Trifolium pratense release] BB930223 Extensin precusor [Arabidopsis thaliana (Mouse-ear cress)]			181	PPPYVYKSPP	10	7.2	108	179
1	Fabaceae	Trifolium	pratense	TA	BB930251 3 [Trifolium pratense release] BB930251 Extensin precusor [Arabidopsis thaliana (Mouse-ear cress)]			194	PPPYVYKSPP	10	11.4	37	150
1	Fabaceae	Trifolium	pratense	TA	BB930678 3 [Trifolium pratense release] BB930678 Extensin precusor [Arabidopsis thaliana (Mouse-ear cress)]			280	PPPYVYKSPP	10	5.7	155	211
1	Fabaceae	Trifolium	pratense	TA	BB930967 1 [Trifolium pratense release] BB930967 Extensin precusor [Arabidopsis thaliana (Mouse-ear cress)]			174	PPPYVYKSPP	10	7.2	101	172
1	Fabaceae	Trifolium	pratense	TA	BB931002 1 [Trifolium pratense release] BB931002 Extensin precusor [Arabidopsis thaliana (Mouse-ear cress)]			83	PPPYVYKSPP	10	5.3	26	81
1	Fabaceae	Trifolium	pratense	TA	BB931715 1 [Trifolium pratense release] BB931715 Extensin precusor [Arabidopsis thaliana (Mouse-ear cress)]			355	PPPYVYKSPP	10	10.9	123	231
1	Fabaceae	Trifolium	pratense	TA	BB932011 3 [Trifolium pratense release] BB932011 Hypothetical protein [Plasmodium berghei]			118	PPPYVYKSPP	10	2.8	72	99
1	Fabaceae	Trifolium	pratense	TA	BB932512 3 [Trifolium pratense release] BB932512 Extensin precusor [Arabidopsis thaliana (Mouse-ear cress)]			198	PPPYVYKSPP	10	16.8	0	175
1	Fabaceae	Trifolium	pratense	TA	BB932999 3 [Trifolium pratense release] BB932999 Extensin precusor [Arabidopsis thaliana (Mouse-ear cress)]			197	PPPYVYKSPP	10	18.5	0	196
1	Fabaceae	Trifolium	pratense	TA	BB933819 1 [Trifolium pratense release] BB933819 Extensin precusor [Arabidopsis thaliana (Mouse-ear cress)]			126	PPPYVYKSPP	10	6.8	51	119
1	Fabaceae	Trifolium	pratense	TA	BB933869 3 [Trifolium pratense release] BB933869			47	PPPYVYKSPP	10	3.6	0	35
1	Fabaceae	Trifolium	pratense	TA	BB934339 2 [Trifolium pratense release] BB934339 Extensin precusor [Arabidopsis thaliana (Mouse-ear cress)]			326	PPPYVYKSPP	10	8.6	223	310
1	Fabaceae	Trifolium	pratense	TA	BB936620 3 [Trifolium pratense release] BB936620 Extensin precusor [Arabidopsis thaliana (Mouse-ear cress)]			282	PPPYVYKSPP	10	4.4	223	267
1	Fabaceae	Trifolium	pratense	TA	BB936711 1 [Trifolium pratense release] BB936711 Unknow protein [Oryza sativa (japonica cultivar-group)]			263	PPPYVYKSPP	10	4	218	261
1	Fabaceae	Trifolium	pratense	TA	BB937161 3 [Trifolium pratense release] BB937161 Extensin precusor [Arabidopsis thaliana (Mouse-ear cress)]			267	PPPYVYKSPP	10	4.4	24	71
1	Fabaceae	Trifolium	pratense	TA	BB937340 1 [Trifolium pratense release] BB937340 Extensin precusor [Arabidopsis thaliana (Mouse-ear cress)]			268	PPPYVYKSPP	10	8.7	23	117
1	Fabaceae	Trifolium	pratense	TA	BB937642 2 [Trifolium pratense release] BB937642 Extensin precusor [Arabidopsis thaliana (Mouse-ear cress)]			103	PPPYVYKSPP	10	8.3	20	102
1	Fabaceae	Trifolium	pratense	TA	BB937650 1 [Trifolium pratense release] BB937650 Extensin precusor [Arabidopsis thaliana (Mouse-ear cress)]			361	PPPYVYKSPP	10	13	220	357
1	Fabaceae	Trifolium	pratense	TA	BB938160 3 [Trifolium pratense release] BB938160 Extensin precusor [Arabidopsis thaliana (Mouse-ear cress)]			390	PPPYVYKSPP	10	10	283	386
1	Fabaceae	Trifolium	pratense	TA	BB938859 2 [Trifolium pratense release] BB938859 Extensin precusor [Arabidopsis thaliana (Mouse-ear cress)]			363	PPPYVYKSPP	10	5.4	198	253
1	Fabaceae	Trifolium	pratense	TA	BB938899 1 [Trifolium pratense release] BB938899 Extensin precusor [Arabidopsis thaliana (Mouse-ear cress)]			368	PPPYVYKSPP	10	13	204	341
1	Brassicaceae	Arabidopsis	thaliana	TC	NP2710276 3 [Arabidopsis thaliana 14] NP2710276 GB|NM_102389.1|NP_173949.1 proline-rich extensin, putative;similar to proline-rich extensin-like family protein [Arabidopsis thaliana] (TAIR:AT1G26240.1); similar to hydroxyproline-rich glycoprotein precursor (GB:AAA87902.1); contains InterPro domain Extensin-like region; (InterPro	AT1G26250	EXT18	541	PPPYVYSSPP	10	40.2	56	461
1	Brassicaceae	Arabidopsis	thaliana	TC	NP306564 1 [Arabidopsis thaliana 14] NP306564 GB|AC079829.6|AAG50682.1 unknown protein	AT1G26250	EXT18	444	PPPYVYSSPP	10	40.2	35	440
1	Brassicaceae	Arabidopsis	thaliana	TC	AV553715 1 [Arabidopsis thaliana 14] AV553715			146	PPPYVYSSPP	10	13.9	0	139
1	Brassicaceae	Arabidopsis	thaliana	TC	CF652385 2 [Arabidopsis thaliana 14] CF652385 similar to UniRef100_Q9STN0 Cluster: Extensin-like protein; n=1; Arabidopsis thaliana|Rep: Extensin-like protein - Arabidopsis thaliana (Mouse-ear cress), partial (33%)	AT1G26250	EXT18	297	PPPYVYSSPP	10	7	49	119
1	Brassicaceae	Brassica	napus	TC	TC76761 3 [Brassica napus 3-1] TC76761 homologue to UniRef100_Q2A9D1 Cluster: Extensin-like region containing protein; n=1; Brassica oleracea|Rep: Extensin-like region containing protein - Brassica oleracea (Wild cabbage), partial (53%)			244	PPPYVYSSPP	10	4.2	11	56
1	Brassicaceae	Brassica	napus	TC	TC93179 3 [Brassica napus 3-1] TC93179			486	PPPYVYSSPP	10	35.6	39	395
1	Fabaceae	Glycine	max	TC	TC285428 3 [Glycine max 14] TC285428 homologue to UniRef100_Q39835 Cluster: Extensin; n=1; Glycine max|Rep: Extensin - Glycine max (Soybean), partial (69%)			319	PPVYKYKSPP	10	9.1	225	318
1	Fabaceae	Glycine	max	TC	TC285857 1 [Glycine max 14] TC285857 homologue to UniRef100_Q39835 Cluster: Extensin; n=1; Glycine max|Rep: Extensin - Glycine max (Soybean), partial (25%)			250	PPVYKYKSPP	10	7.8	41	118
1	Fabaceae	Glycine	max	TC	TC303044 1 [Glycine max 14] TC303044 similar to UniRef100_Q09083 Cluster: Hydroxyproline-rich glycoprotein precursor; n=1; Phaseolus vulgaris|Rep: Hydroxyproline-rich glycoprotein precursor - Phaseolus vulgaris (Kidney bean) (French bean), partial (13%)			249	PPVYKYKSPP	10	2	95	114
1	Fabaceae	Glycine	max	TC	TC316266 3 [Glycine max 14] TC316266 homologue to UniRef100_Q09083 Cluster: Hydroxyproline-rich glycoprotein precursor; n=1; Phaseolus vulgaris|Rep: Hydroxyproline-rich glycoprotein precursor - Phaseolus vulgaris (Kidney bean) (French bean), partial (19%)			181	PPVYKYKSPP	10	11	3	112
1	Fabaceae	Glycine	max	TC	TC327175 3 [Glycine max 14] TC327175 homologue to UniRef100_Q39835 Cluster: Extensin; n=1; Glycine max|Rep: Extensin - Glycine max (Soybean), partial (34%)			175	PPVYKYKSPP	10	9.9	49	148
1	Fabaceae	Glycine	max	TC	TC338414 2 [Glycine max 14] TC338414 homologue to UniRef100_Q39835 Cluster: Extensin; n=1; Glycine max|Rep: Extensin - Glycine max (Soybean), partial (29%)			141	PPVYKYKSPP	10	12.2	0	123
1	Fabaceae	Glycine	max	TC	TC340659 3 [Glycine max 14] TC340659 homologue to UniRef100_Q39835 Cluster: Extensin; n=1; Glycine max|Rep: Extensin - Glycine max (Soybean), partial (30%)			177	PPVYKYKSPP	10	12.8	12	139
1	Fabaceae	Glycine	max	TC	TC345105 2 [Glycine max 14] TC345105 homologue to UniRef100_Q39835 Cluster: Extensin; n=1; Glycine max|Rep: Extensin - Glycine max (Soybean), partial (24%)			147	PPVYKYKSPP	10	9.7	5	104
1	Fabaceae	Glycine	max	TC	TC346100 1 [Glycine max 14] TC346100 homologue to UniRef100_Q39835 Cluster: Extensin; n=1; Glycine max|Rep: Extensin - Glycine max (Soybean), partial (24%)			238	PPVYKYKSPP	10	10	93	192
1	Fabaceae	Glycine	max	TC	TC338517 1 [Glycine max 14] TC338517 similar to UniRef100_Q39835 Cluster: Extensin; n=1; Glycine max|Rep: Extensin - Glycine max (Soybean), partial (26%)			213	PPVYKYKSPP	10	5.7	67	126
1	Fabaceae	Glycine	max	TC	BI424904 1 [Glycine max 14] BI424904 homologue to UniRef100_Q09083 Cluster: Hydroxyproline-rich glycoprotein precursor; n=1; Phaseolus vulgaris|Rep: Hydroxyproline-rich glycoprotein precursor - Phaseolus vulgaris (Kidney bean) (French bean), partial (20%)			127	PPVYKYKSPP	10	11.4	0	113
1	Fabaceae	Glycine	max	TC	AI437617 1 [Glycine max 14] AI437617 homologue to UniRef100_Q09083 Cluster: Hydroxyproline-rich glycoprotein precursor; n=1; Phaseolus vulgaris|Rep: Hydroxyproline-rich glycoprotein precursor - Phaseolus vulgaris (Kidney bean) (French bean), partial (17%)			137	PPVYKYKSPP	10	5.4	1	57
1	Fabaceae	Glycine	max	TC	BQ785771 1 [Glycine max 14] BQ785771 UniRef100_Q39835 Cluster: Extensin; n=1; Glycine max|Rep: Extensin - Glycine max (Soybean), partial (14%)			140	PPVYKYKSPP	10	2	22	41
1	Fabaceae	Glycine	max	TC	BM107858 2 [Glycine max 14] BM107858 homologue to UniRef100_Q39835 Cluster: Extensin; n=1; Glycine max|Rep: Extensin - Glycine max (Soybean), partial (18%)			200	PPVYKYKSPP	10	7.1	87	157
1	Fabaceae	Medicago	truncatula	TC	TC126424 1 [Medicago truncatula 9] TC126424 similar to UniRef100_Q39835 Cluster: Extensin; n=1; Glycine max|Rep: Extensin - Glycine max (Soybean), partial (50%)	AC231338_13.1	Extensin-like region	232	PPVYKYKSPP	10	13.9	50	197
1	Fabaceae	Medicago	truncatula	TC	TC126984 3 [Medicago truncatula 9] TC126984 similar to UniRef100_Q9M6R7 Cluster: Extensin; n=1; Pisum sativum|Rep: Extensin - Pisum sativum (Garden pea), partial (62%)	AC231338_13.1	Extensin-like region	210	PPVYKYKSPP	10	13.7	66	207
1	Fabaceae	Medicago	truncatula	TC	TC128160 2 [Medicago truncatula 9] TC128160 homologue to UniRef100_Q09083 Cluster: Hydroxyproline-rich glycoprotein precursor; n=1; Phaseolus vulgaris|Rep: Hydroxyproline-rich glycoprotein precursor - Phaseolus vulgaris (Kidney bean) (French bean), partial (34%)			258	PPVYKYKSPP	10	18.2	3	190
1	Fabaceae	Medicago	truncatula	TC	TC130454 2 [Medicago truncatula 9] TC130454 homologue to UniRef100_Q9M6R7 Cluster: Extensin; n=1; Pisum sativum|Rep: Extensin - Pisum sativum (Garden pea), partial (43%)			344	PPVYKYKSPP	10	12.1	118	241
1	Fabaceae	Medicago	truncatula	TC	TC132033 3 [Medicago truncatula 9] TC132033 homologue to UniRef100_Q09083 Cluster: Hydroxyproline-rich glycoprotein precursor; n=1; Phaseolus vulgaris|Rep: Hydroxyproline-rich glycoprotein precursor - Phaseolus vulgaris (Kidney bean) (French bean), partial (40%)			272	PPVYKYKSPP	10	19.3	0	195
1	Fabaceae	Medicago	truncatula	TC	TC126251 1 [Medicago truncatula 9] TC126251 homologue to UniRef100_Q09083 Cluster: Hydroxyproline-rich glycoprotein precursor; n=1; Phaseolus vulgaris|Rep: Hydroxyproline-rich glycoprotein precursor - Phaseolus vulgaris (Kidney bean) (French bean), partial (53%)			555	PPVYKYKSPP	10	18.5	14	207
1	Fabaceae	Medicago	truncatula	TC	TC126251 1 [Medicago truncatula 9] TC126251 homologue to UniRef100_Q09083 Cluster: Hydroxyproline-rich glycoprotein precursor; n=1; Phaseolus vulgaris|Rep: Hydroxyproline-rich glycoprotein precursor - Phaseolus vulgaris (Kidney bean) (French bean), partial (53%)			555	PPVYKYKSPP	10	21.3	212	430
1	Fabaceae	Medicago	truncatula	TC	TC134054 1 [Medicago truncatula 9] TC134054 similar to UniRef100_Q9M6R7 Cluster: Extensin; n=1; Pisum sativum|Rep: Extensin - Pisum sativum (Garden pea), partial (30%)			232	PPVYKYKSPP	10	3.5	26	62
1	Fabaceae	Medicago	truncatula	TC	TC137601 3 [Medicago truncatula 9] TC137601 homologue to UniRef100_Q09083 Cluster: Hydroxyproline-rich glycoprotein precursor; n=1; Phaseolus vulgaris|Rep: Hydroxyproline-rich glycoprotein precursor - Phaseolus vulgaris (Kidney bean) (French bean), partial (42%)			514	PPVYKYKSPP	10	21.1	26	248
1	Fabaceae	Medicago	truncatula	TC	TC137748 1 [Medicago truncatula 9] TC137748 homologue to UniRef100_Q9M6R7 Cluster: Extensin; n=1; Pisum sativum|Rep: Extensin - Pisum sativum (Garden pea), partial (27%)			107	PPVYKYKSPP	10	8.4	8	95
1	Fabaceae	Medicago	truncatula	TC	TC138272 3 [Medicago truncatula 9] TC138272 similar to UniRef100_Q9M6R7 Cluster: Extensin; n=1; Pisum sativum|Rep: Extensin - Pisum sativum (Garden pea), partial (77%)	AC231338_13.1	Extensin-like region	322	PPVYKYKSPP	10	16.5	46	219
1	Fabaceae	Medicago	truncatula	TC	TC139432 2 [Medicago truncatula 9] TC139432 homologue to UniRef100_Q39835 Cluster: Extensin; n=1; Glycine max|Rep: Extensin - Glycine max (Soybean), partial (42%)	AC231338_13.1	Extensin-like region	204	PPVYKYKSPP	10	12.4	56	183
1	Fabaceae	Medicago	truncatula	TC	TC139946 1 [Medicago truncatula 9] TC139946 homologue to UniRef100_Q39835 Cluster: Extensin; n=1; Glycine max|Rep: Extensin - Glycine max (Soybean), partial (45%)	AC231338_13.1	Extensin-like region	203	PPVYKYKSPP	10	12.5	35	163
1	Fabaceae	Medicago	truncatula	TC	TC139946 1 [Medicago truncatula 9] TC139946 homologue to UniRef100_Q39835 Cluster: Extensin; n=1; Glycine max|Rep: Extensin - Glycine max (Soybean), partial (45%)	AC231338_13.1	Extensin-like region	203	PPVYKYKSPP	10	2.1	168	188
1	Fabaceae	Medicago	truncatula	TC	TC140501 1 [Medicago truncatula 9] TC140501 similar to UniRef100_Q9M6R7 Cluster: Extensin; n=1; Pisum sativum|Rep: Extensin - Pisum sativum (Garden pea), partial (87%)	AC231338_13.1	Extensin-like region	308	PPVYKYKSPP	10	22.8	49	285
1	Fabaceae	Medicago	truncatula	TC	TC141374 1 [Medicago truncatula 9] TC141374 homologue to UniRef100_Q9M6R7 Cluster: Extensin; n=1; Pisum sativum|Rep: Extensin - Pisum sativum (Garden pea), partial (48%)			226	PPVYKYKSPP	10	3.1	17	49
1	Fabaceae	Medicago	truncatula	TC	TC141374 1 [Medicago truncatula 9] TC141374 homologue to UniRef100_Q9M6R7 Cluster: Extensin; n=1; Pisum sativum|Rep: Extensin - Pisum sativum (Garden pea), partial (48%)			226	PPVYKYKSPP	10	8.1	102	185
1	Fabaceae	Medicago	truncatula	TC	TC141374 3 [Medicago truncatula 9] TC141374 homologue to UniRef100_Q9M6R7 Cluster: Extensin; n=1; Pisum sativum|Rep: Extensin - Pisum sativum (Garden pea), partial (48%)			226	PPVYKYKSPP	10	2.2	79	100
1	Fabaceae	Medicago	truncatula	TC	BF639374 3 [Medicago truncatula 9] BF639374 homologue to UniRef100_Q39835 Cluster: Extensin; n=1; Glycine max|Rep: Extensin - Glycine max (Soybean), partial (29%)			126	PPVYKYKSPP	10	8	27	109
1	Fabaceae	Medicago	truncatula	TC	BE324670 2 [Medicago truncatula 9] BE324670 similar to UniRef100_Q09083 Cluster: Hydroxyproline-rich glycoprotein precursor; n=1; Phaseolus vulgaris|Rep: Hydroxyproline-rich glycoprotein precursor - Phaseolus vulgaris (Kidney bean) (French bean), partial (21%)			132	PPVYKYKSPP	10	6.9	2	73
1	Fabaceae	Medicago	truncatula	TC	BE324670 2 [Medicago truncatula 9] BE324670 similar to UniRef100_Q09083 Cluster: Hydroxyproline-rich glycoprotein precursor; n=1; Phaseolus vulgaris|Rep: Hydroxyproline-rich glycoprotein precursor - Phaseolus vulgaris (Kidney bean) (French bean), partial (21%)			132	PPVYKYKSPP	10	3.7	78	114
1	Fabaceae	Medicago	truncatula	TC	BE324670 2 [Medicago truncatula 9] BE324670 similar to UniRef100_Q09083 Cluster: Hydroxyproline-rich glycoprotein precursor; n=1; Phaseolus vulgaris|Rep: Hydroxyproline-rich glycoprotein precursor - Phaseolus vulgaris (Kidney bean) (French bean), partial (21%)			132	PPVYKYKSPP	10	3.8	56	96
1	Fabaceae	Medicago	truncatula	TC	BG586609 1 [Medicago truncatula 9] BG586609 similar to UniRef100_Q39835 Cluster: Extensin; n=1; Glycine max|Rep: Extensin - Glycine max (Soybean), partial (40%)	AC231338_13.1	Extensin-like region	224	PPVYKYKSPP	10	12.5	33	164
1	Fabaceae	Medicago	truncatula	TC	CX534353 2 [Medicago truncatula 9] CX534353 similar to UniRef100_Q39835 Cluster: Extensin; n=1; Glycine max|Rep: Extensin - Glycine max (Soybean), partial (46%)	AC231338_13.1	Extensin-like region	198	PPVYKYKSPP	10	15.2	40	197
1	Fabaceae	Medicago	truncatula	TC	CX533293 3 [Medicago truncatula 9] CX533293 similar to UniRef100_Q39835 Cluster: Extensin; n=1; Glycine max|Rep: Extensin - Glycine max (Soybean), partial (37%)	AC231338_13.1	Extensin-like region	172	PPVYKYKSPP	10	6.8	62	131
1	Fabaceae	Medicago	truncatula	TC	CX533535 1 [Medicago truncatula 9] CX533535 homologue to UniRef100_Q09083 Cluster: Hydroxyproline-rich glycoprotein precursor; n=1; Phaseolus vulgaris|Rep: Hydroxyproline-rich glycoprotein precursor - Phaseolus vulgaris (Kidney bean) (French bean), partial (33%)			207	PPVYKYKSPP	10	18.1	19	206
1	Fabaceae	Medicago	truncatula	TC	BE203353 2 [Medicago truncatula 9] BE203353 gb|AF071069.1|AF071069 Trifolium repens 18S ribosomal RNA gene, partial sequence, partial (18%)			203	PPVYKYKSPP	10	6.3	104	166
1	Solanaceae	Nicotiana	tabacum	TC	TC66794 1 [Nicotiana tabacum 5] TC66794 UniRef100_Q9FSG0 Cluster: Extensin precursor; n=1; Nicotiana sylvestris|Rep: Extensin precursor - Nicotiana sylvestris (Wood tobacco), partial (59%)			167	PPVYKYKSPP	10	8.2	0	81
1	Solanaceae	Nicotiana	tabacum	TC	TC66940 2 [Nicotiana tabacum 5] TC66940 homologue to UniRef100_Q9FSG0 Cluster: Extensin precursor; n=1; Nicotiana sylvestris|Rep: Extensin precursor - Nicotiana sylvestris (Wood tobacco), partial (95%)			256	PPVYKYKSPP	10	12.8	44	172
1	Solanaceae	Nicotiana	tabacum	TC	DW002936 1 [Nicotiana tabacum 5] DW002936 similar to UniRef100_Q8H9E0 Cluster: Hydroxyproline-rich glycoprotein; n=1; Solanum tuberosum|Rep: Hydroxyproline-rich glycoprotein - Solanum tuberosum (Potato), partial (82%)			261	PPVYKYKSPP	10	18.3	36	220
1	Fabaceae	Phaseolus	vulgaris	TC	TC14600 3 [Phaseolus vulgaris 3] TC14600 UniRef100_Q09083 Cluster: Hydroxyproline-rich glycoprotein precursor; n=1; Phaseolus vulgaris|Rep: Hydroxyproline-rich glycoprotein precursor - Phaseolus vulgaris (Kidney bean) (French bean), partial (19%)			220	PPVYKYKSPP	10	10.8	0	107
1	Pinaceae	Picea	glauca	TC	TC74698 1 [Picea glauca NoSp] TC74698 similar to UniRef100_Q8H9E0 Cluster: Hydroxyproline-rich glycoprotein; n=1; Solanum tuberosum|Rep: Hydroxyproline-rich glycoprotein - Solanum tuberosum (Potato), partial (41%)			223	PPVYKYKSPP	10	8	0	87
1	Solanaceae	Solanum	lycopersicum	TC	TC201311 3 [Solanum lycopersicum 12] TC201311 similar to UniRef100_Q09083 Cluster: Hydroxyproline-rich glycoprotein precursor; n=1; Phaseolus vulgaris|Rep: Hydroxyproline-rich glycoprotein precursor - Phaseolus vulgaris (Kidney bean) (French bean), partial (33%)			239	PPVYKYKSPP	10	16.6	28	198
1	Solanaceae	Solanum	lycopersicum	TC	TC210893 3 [Solanum lycopersicum 12] TC210893 similar to UniRef100_Q09083 Cluster: Hydroxyproline-rich glycoprotein precursor; n=1; Phaseolus vulgaris|Rep: Hydroxyproline-rich glycoprotein precursor - Phaseolus vulgaris (Kidney bean) (French bean), partial (31%)			397	PPVYKYKSPP	10	15.8	32	196
1	Solanaceae	Solanum	lycopersicum	TC	TC213235 3 [Solanum lycopersicum 12] TC213235 similar to UniRef100_Q09083 Cluster: Hydroxyproline-rich glycoprotein precursor; n=1; Phaseolus vulgaris|Rep: Hydroxyproline-rich glycoprotein precursor - Phaseolus vulgaris (Kidney bean) (French bean), partial (58%)			547	PPVYKYKSPP	10	36.8	32	406
1	Solanaceae	Solanum	lycopersicum	TC	TC214040 3 [Solanum lycopersicum 12] TC214040 similar to UniRef100_Q9FSG0 Cluster: Extensin precursor; n=1; Nicotiana sylvestris|Rep: Extensin precursor - Nicotiana sylvestris (Wood tobacco), partial (63%)			230	PPVYKYKSPP	10	6.6	26	93
1	Solanaceae	Solanum	lycopersicum	TC	TC215255 1 [Solanum lycopersicum 12] TC215255 UniRef100_O22493 Cluster: Glutamate--cysteine ligase, chloroplast precursor; n=1; Solanum lycopersicum|Rep: Glutamate--cysteine ligase, chloroplast precursor - Solanum lycopersicum (Tomato) (Lycopersicon esculentum), partial (45%)			386	PPVYKYKSPP	10	6.5	47	114
1	Solanaceae	Solanum	lycopersicum	TC	TC217080 1 [Solanum lycopersicum 12] TC217080 similar to UniRef100_Q09083 Cluster: Hydroxyproline-rich glycoprotein precursor; n=1; Phaseolus vulgaris|Rep: Hydroxyproline-rich glycoprotein precursor - Phaseolus vulgaris (Kidney bean) (French bean), partial (54%)			368	PPVYKYKSPP	10	31.3	0	322
1	Solanaceae	Solanum	lycopersicum	TC	AW932239 1 [Solanum lycopersicum 12] AW932239 homologue to UniRef100_Q8H9E0 Cluster: Hydroxyproline-rich glycoprotein; n=1; Solanum tuberosum|Rep: Hydroxyproline-rich glycoprotein - Solanum tuberosum (Potato), partial (75%)			209	PPVYKYKSPP	10	16.6	31	201
1	Solanaceae	Solanum	tuberosum	TC	TC166047 2 [Solanum tuberosum 12] TC166047 hydroxyproline-rich glycoprotein [Solanum tuberosum]			554	PPVYKYKSPP	10	23.5	31	285
1	Solanaceae	Solanum	tuberosum	TC	TC166047 3 [Solanum tuberosum 12] TC166047 hydroxyproline-rich glycoprotein [Solanum tuberosum]			554	PPVYKYKSPP	10	13	285	417
1	Solanaceae	Solanum	tuberosum	TC	TC168109 1 [Solanum tuberosum 12] TC168109 similar to UniRef100_Q09083 Cluster: Hydroxyproline-rich glycoprotein precursor; n=1; Phaseolus vulgaris|Rep: Hydroxyproline-rich glycoprotein precursor - Phaseolus vulgaris (Kidney bean) (French bean), partial (44%)			346	PPVYKYKSPP	10	22.5	34	264
1	Solanaceae	Solanum	tuberosum	TC	TC179446 2 [Solanum tuberosum 12] TC179446 similar to UniRef100_Q09083 Cluster: Hydroxyproline-rich glycoprotein precursor; n=1; Phaseolus vulgaris|Rep: Hydroxyproline-rich glycoprotein precursor - Phaseolus vulgaris (Kidney bean) (French bean), partial (26%)			251	PPVYKYKSPP	10	10.8	13	126
1	Solanaceae	Solanum	tuberosum	TC	TC180170 2 [Solanum tuberosum 12] TC180170 homologue to UniRef100_Q8H9E0 Cluster: Hydroxyproline-rich glycoprotein; n=1; Solanum tuberosum|Rep: Hydroxyproline-rich glycoprotein - Solanum tuberosum (Potato), partial (23%)			289	PPVYKYKSPP	10	4.7	240	288
1	Solanaceae	Solanum	tuberosum	TC	TC190573 2 [Solanum tuberosum 12] TC190573 similar to UniRef100_Q09083 Cluster: Hydroxyproline-rich glycoprotein precursor; n=1; Phaseolus vulgaris|Rep: Hydroxyproline-rich glycoprotein precursor - Phaseolus vulgaris (Kidney bean) (French bean), partial (51%)			361	PPVYKYKSPP	10	31.6	27	360
1	Solanaceae	Solanum	tuberosum	TC	TC190966 1 [Solanum tuberosum 12] TC190966 UniRef100_Q8H9E1 Cluster: Extensin; n=1; Solanum tuberosum|Rep: Extensin - Solanum tuberosum (Potato), complete			280	PPVYKYKSPP	10	7.9	57	137
1	Solanaceae	Capsicum	annuum	TC	TC18709 1 [Capsicum annuum 4] TC18709 similar to UniRef100_Q09083 Cluster: Hydroxyproline-rich glycoprotein precursor; n=1; Phaseolus vulgaris|Rep: Hydroxyproline-rich glycoprotein precursor - Phaseolus vulgaris (Kidney bean) (French bean), partial (33%)			230	PPVYKYKSPP	10	13	87	224
1	Solanaceae	Capsicum	annuum	TC	TC19319 3 [Capsicum annuum 4] TC19319 similar to UniRef100_Q09083 Cluster: Hydroxyproline-rich glycoprotein precursor; n=1; Phaseolus vulgaris|Rep: Hydroxyproline-rich glycoprotein precursor - Phaseolus vulgaris (Kidney bean) (French bean), partial (31%)			178	PPVYKYKSPP	10	14.3	29	177
1	Solanaceae	Capsicum	annuum	TC	TC19530 3 [Capsicum annuum 4] TC19530 similar to UniRef100_Q09083 Cluster: Hydroxyproline-rich glycoprotein precursor; n=1; Phaseolus vulgaris|Rep: Hydroxyproline-rich glycoprotein precursor - Phaseolus vulgaris (Kidney bean) (French bean), partial (42%)			396	PPVYKYKSPP	10	22.5	30	266
1	Solanaceae	Capsicum	annuum	TC	TC20393 1 [Capsicum annuum 4] TC20393 homologue to UniRef100_Q8H9E0 Cluster: Hydroxyproline-rich glycoprotein; n=1; Solanum tuberosum|Rep: Hydroxyproline-rich glycoprotein - Solanum tuberosum (Potato), partial (57%)			188	PPVYKYKSPP	10	6.3	3	69
1	Solanaceae	Capsicum	annuum	TC	TC20393 2 [Capsicum annuum 4] TC20393 homologue to UniRef100_Q8H9E0 Cluster: Hydroxyproline-rich glycoprotein; n=1; Solanum tuberosum|Rep: Hydroxyproline-rich glycoprotein - Solanum tuberosum (Potato), partial (57%)			187	PPVYKYKSPP	10	4.3	69	111
1	Solanaceae	Capsicum	annuum	TC	TC22539 3 [Capsicum annuum 4] TC22539 similar to UniRef100_Q09083 Cluster: Hydroxyproline-rich glycoprotein precursor; n=1; Phaseolus vulgaris|Rep: Hydroxyproline-rich glycoprotein precursor - Phaseolus vulgaris (Kidney bean) (French bean), partial (33%)			232	PPVYKYKSPP	10	17.1	30	211
1	Solanaceae	Capsicum	annuum	TC	TC25434 1 [Capsicum annuum 4] TC25434 homologue to UniRef100_Q8H9E0 Cluster: Hydroxyproline-rich glycoprotein; n=1; Solanum tuberosum|Rep: Hydroxyproline-rich glycoprotein - Solanum tuberosum (Potato), partial (74%)			198	PPVYKYKSPP	10	2.1	66	86
1	Solanaceae	Capsicum	annuum	TC	TC25434 2 [Capsicum annuum 4] TC25434 homologue to UniRef100_Q8H9E0 Cluster: Hydroxyproline-rich glycoprotein; n=1; Solanum tuberosum|Rep: Hydroxyproline-rich glycoprotein - Solanum tuberosum (Potato), partial (74%)			198	PPVYKYKSPP	10	9.7	86	187
1	Solanaceae	Capsicum	annuum	TC	GD116157 3 [Capsicum annuum 4] GD116157 similar to UniRef100_Q09083 Cluster: Hydroxyproline-rich glycoprotein precursor; n=1; Phaseolus vulgaris|Rep: Hydroxyproline-rich glycoprotein precursor - Phaseolus vulgaris (Kidney bean) (French bean), partial (26%)			159	PPVYKYKSPP	10	15	2	158
1	Solanaceae	Capsicum	annuum	TC	GD123424 3 [Capsicum annuum 4] GD123424 similar to UniRef100_Q09083 Cluster: Hydroxyproline-rich glycoprotein precursor; n=1; Phaseolus vulgaris|Rep: Hydroxyproline-rich glycoprotein precursor - Phaseolus vulgaris (Kidney bean) (French bean), partial (39%)			202	PPVYKYKSPP	10	18.8	0	197
1	Ginkgoaceae	Ginkgo	biloba	TA	TA1383_3311 1 [Ginkgo biloba release] TA1383_3311 Extensin precusor [Arabidopsis thaliana (Mouse-ear cress)]			285	PPVYKYKSPP	10	15.7	4	169
1	Plantaginaceae	Antirrhinum	majus	TA	AJ802865 1 [Antirrhinum majus release] AJ802865 Extensin precusor [Arabidopsis thaliana (Mouse-ear cress)]			233	PPVYKYKSPP	10	19.7	31	229
1	Euphorbiaceae	Manihot	esculenta	TA	CK649576 3 [Manihot esculenta release] CK649576 Extensin precusor [Arabidopsis thaliana (Mouse-ear cress)]			144	PPVYKYKSPP	10	3.1	111	143
1	Fabaceae	Medicago	sativa	TA	CO515950 3 [Medicago sativa release] CO515950			152	PPVYKYKSPP	10	4	1	40
1	Solanaceae	Nicotiana	sylvestris	TA	X70343 1 [Nicotiana sylvestris release] X70343 Extensin precusor [Arabidopsis thaliana (Mouse-ear cress)]			242	PPVYKYKSPP	10	9.3	23	117
1	Fabaceae	Pisum	sativum	TA	TA690_3888 1 [Pisum sativum release] TA690_3888 Extensin precusor [Arabidopsis thaliana (Mouse-ear cress)]			431	PPVYKYKSPP	10	16.7	121	296
1	Fabaceae	Pisum	sativum	TA	AB087836 3 [Pisum sativum release] AB087836 Extensin precusor [Arabidopsis thaliana (Mouse-ear cress)]			142	PPVYKYKSPP	10	9.1	0	96
1	Aristolochiaceae	Saruma	henryi	TA	DT595476 2 [Saruma henryi release] DT595476 Extensin precusor [Arabidopsis thaliana (Mouse-ear cress)]			120	PPVYKYKSPP	10	4.5	29	74
1	Solanaceae	Solanum	chacoense	TA	DN978323 2 [Solanum chacoense release] DN978323 Extensin precusor [Arabidopsis thaliana (Mouse-ear cress)]			275	PPVYKYKSPP	10	17.6	6	193
1	Fabaceae	Trifolium	pratense	TA	TA39_57577 2 [Trifolium pratense release] TA39_57577 Extensin precusor [Arabidopsis thaliana (Mouse-ear cress)]			340	PPVYKYKSPP	10	23.7	0	245
1	Fabaceae	Trifolium	pratense	TA	TA43_57577 3 [Trifolium pratense release] TA43_57577 Extensin precusor [Arabidopsis thaliana (Mouse-ear cress)]			325	PPVYKYKSPP	10	24	42	293
1	Fabaceae	Trifolium	pratense	TA	TA106_57577 2 [Trifolium pratense release] TA106_57577 AT4g34150/F28A23_90 [Arabidopsis thaliana (Mouse-ear cress)]			211	PPVYKYKSPP	10	4.8	160	210
1	Fabaceae	Trifolium	pratense	TA	TA306_57577 2 [Trifolium pratense release] TA306_57577 Extensin precusor [Arabidopsis thaliana (Mouse-ear cress)]			217	PPVYKYKSPP	10	16.3	0	171
1	Fabaceae	Trifolium	pratense	TA	TA384_57577 3 [Trifolium pratense release] TA384_57577 Extensin precusor [Arabidopsis thaliana (Mouse-ear cress)]			65	PPVYKYKSPP	10	4	23	62
1	Fabaceae	Trifolium	pratense	TA	TA424_57577 1 [Trifolium pratense release] TA424_57577 Extensin precusor [Arabidopsis thaliana (Mouse-ear cress)]			299	PPVYKYKSPP	10	12.8	146	279
1	Fabaceae	Trifolium	pratense	TA	BB928816 1 [Trifolium pratense release] BB928816 Extensin precusor [Arabidopsis thaliana (Mouse-ear cress)]			220	PPVYKYKSPP	10	9.8	100	200
1	Fabaceae	Trifolium	pratense	TA	BB929191 3 [Trifolium pratense release] BB929191			91	PPVYKYKSPP	10	4.5	19	63
1	Fabaceae	Trifolium	pratense	TA	BB931095 2 [Trifolium pratense release] BB931095 Extensin precusor [Arabidopsis thaliana (Mouse-ear cress)]			73	PPVYKYKSPP	10	5	20	70
1	Fabaceae	Trifolium	pratense	TA	BB931216 1 [Trifolium pratense release] BB931216			62	PPVYKYKSPP	10	2.4	32	55
1	Fabaceae	Trifolium	pratense	TA	BB931488 3 [Trifolium pratense release] BB931488			95	PPVYKYKSPP	10	3.8	44	81
1	Fabaceae	Trifolium	pratense	TA	BB931496 1 [Trifolium pratense release] BB931496 Extensin precusor [Arabidopsis thaliana (Mouse-ear cress)]			74	PPVYKYKSPP	10	6	2	64
1	Fabaceae	Trifolium	pratense	TA	BB931513 3 [Trifolium pratense release] BB931513 Kluyveromyces lactis strain NRRL Y-1140 chromosome D of strain NRRL Y- 1140 of Kluyveromyces lactis [Kluyveromyces lactis (Yeast)]			105	PPVYKYKSPP	10	2.1	81	101
1	Fabaceae	Trifolium	pratense	TA	BB931961 3 [Trifolium pratense release] BB931961 Extensin precusor [Arabidopsis thaliana (Mouse-ear cress)]			384	PPVYKYKSPP	10	10.4	224	330
1	Fabaceae	Trifolium	pratense	TA	BB932085 1 [Trifolium pratense release] BB932085			407	PPVYKYKSPP	10	3.4	208	241
1	Fabaceae	Trifolium	pratense	TA	BB932098 1 [Trifolium pratense release] BB932098 Extensin precusor [Arabidopsis thaliana (Mouse-ear cress)]			172	PPVYKYKSPP	10	9.7	24	125
1	Fabaceae	Trifolium	pratense	TA	BB932411 1 [Trifolium pratense release] BB932411 Extensin precusor [Arabidopsis thaliana (Mouse-ear cress)]			159	PPVYKYKSPP	10	14.8	0	153
1	Fabaceae	Trifolium	pratense	TA	BB932758 1 [Trifolium pratense release] BB932758 Extensin precusor [Arabidopsis thaliana (Mouse-ear cress)]			200	PPVYKYKSPP	10	11.7	9	131
1	Fabaceae	Trifolium	pratense	TA	BB932981 2 [Trifolium pratense release] BB932981 Extensin precusor [Arabidopsis thaliana (Mouse-ear cress)]			122	PPVYKYKSPP	10	11.8	1	121
1	Fabaceae	Trifolium	pratense	TA	BB933126 3 [Trifolium pratense release] BB933126			164	PPVYKYKSPP	10	4.3	107	149
1	Fabaceae	Trifolium	pratense	TA	BB933321 2 [Trifolium pratense release] BB933321 Extensin precusor [Arabidopsis thaliana (Mouse-ear cress)]			264	PPVYKYKSPP	10	6.2	20	81
1	Fabaceae	Trifolium	pratense	TA	BB933321 2 [Trifolium pratense release] BB933321 Extensin precusor [Arabidopsis thaliana (Mouse-ear cress)]			264	PPVYKYKSPP	10	6.2	20	81
1	Fabaceae	Trifolium	pratense	TA	BB933530 3 [Trifolium pratense release] BB933530			48	PPVYKYKSPP	10	4.1	5	46
1	Fabaceae	Trifolium	pratense	TA	BB933891 2 [Trifolium pratense release] BB933891 Extensin precusor [Arabidopsis thaliana (Mouse-ear cress)]			119	PPVYKYKSPP	10	11.1	0	116
1	Fabaceae	Trifolium	pratense	TA	BB933897 2 [Trifolium pratense release] BB933897 Extensin precusor [Arabidopsis thaliana (Mouse-ear cress)]			205	PPVYKYKSPP	10	14.9	47	204
1	Fabaceae	Trifolium	pratense	TA	BB933904 3 [Trifolium pratense release] BB933904			82	PPVYKYKSPP	10	3	0	29
1	Fabaceae	Trifolium	pratense	TA	BB934251 3 [Trifolium pratense release] BB934251 Extensin precusor [Arabidopsis thaliana (Mouse-ear cress)]			96	PPVYKYKSPP	10	5	43	95
1	Fabaceae	Trifolium	pratense	TA	BB934512 1 [Trifolium pratense release] BB934512			293	PPVYKYKSPP	10	5.3	63	116
1	Fabaceae	Trifolium	pratense	TA	BB934545 3 [Trifolium pratense release] BB934545 Extensin precusor [Arabidopsis thaliana (Mouse-ear cress)]			115	PPVYKYKSPP	10	8.9	0	91
1	Fabaceae	Trifolium	pratense	TA	BB934655 2 [Trifolium pratense release] BB934655			120	PPVYKYKSPP	10	5.5	50	104
1	Fabaceae	Trifolium	pratense	TA	BB935161 1 [Trifolium pratense release] BB935161			404	PPVYKYKSPP	10	2.1	198	218
1	Fabaceae	Trifolium	pratense	TA	BB935229 1 [Trifolium pratense release] BB935229			96	PPVYKYKSPP	10	5	43	93
1	Fabaceae	Trifolium	pratense	TA	BB935684 2 [Trifolium pratense release] BB935684 Extensin precusor [Arabidopsis thaliana (Mouse-ear cress)]			159	PPVYKYKSPP	10	5	106	156
1	Fabaceae	Trifolium	pratense	TA	BB936371 2 [Trifolium pratense release] BB936371 Extensin precusor [Arabidopsis thaliana (Mouse-ear cress)]			173	PPVYKYKSPP	10	10.7	61	172
1	Fabaceae	Trifolium	pratense	TA	BB936713 2 [Trifolium pratense release] BB936713			68	PPVYKYKSPP	10	6.2	0	64
1	Fabaceae	Trifolium	pratense	TA	BB937207 3 [Trifolium pratense release] BB937207 Extensin precusor [Arabidopsis thaliana (Mouse-ear cress)]			178	PPVYKYKSPP	10	9.8	2	102
1	Fabaceae	Trifolium	pratense	TA	BB937285 1 [Trifolium pratense release] BB937285			152	PPVYKYKSPP	10	3.6	0	38
1	Fabaceae	Trifolium	pratense	TA	BB937476 1 [Trifolium pratense release] BB937476			86	PPVYKYKSPP	10	8.1	0	84
1	Fabaceae	Trifolium	pratense	TA	BB937979 1 [Trifolium pratense release] BB937979 Extensin precusor [Arabidopsis thaliana (Mouse-ear cress)]			110	PPVYKYKSPP	10	5	57	107
1	Fabaceae	Trifolium	pratense	TA	BB938432 3 [Trifolium pratense release] BB938432			66	PPVYKYKSPP	10	3.3	33	65
1	Fabaceae	Trifolium	pratense	TA	BB939302 3 [Trifolium pratense release] BB939302 Extensin precusor [Arabidopsis thaliana (Mouse-ear cress)]			123	PPVYKYKSPP	10	4	82	121
1	Fabaceae	Trifolium	pratense	TA	BB939437 1 [Trifolium pratense release] BB939437			372	PPVYKYKSPP	10	4.4	209	253
1	Fabaceae	Glycine	max	TC	TC301210 1 [Glycine max 14] TC301210 similar to UniRef100_Q09083 Cluster: Hydroxyproline-rich glycoprotein precursor; n=1; Phaseolus vulgaris|Rep: Hydroxyproline-rich glycoprotein precursor - Phaseolus vulgaris (Kidney bean) (French bean), partial (25%)			237	PPPPPYKYPS	10	12.3	4	136
1	Fabaceae	Glycine	max	TC	TC308513 3 [Glycine max 14] TC308513 similar to UniRef100_Q39835 Cluster: Extensin; n=1; Glycine max|Rep: Extensin - Glycine max (Soybean), partial (43%)			249	PPPPPYKYPS	10	11.8	64	192
1	Fabaceae	Glycine	max	TC	TC323256 1 [Glycine max 14] TC323256 homologue to UniRef100_Q09083 Cluster: Hydroxyproline-rich glycoprotein precursor; n=1; Phaseolus vulgaris|Rep: Hydroxyproline-rich glycoprotein precursor - Phaseolus vulgaris (Kidney bean) (French bean), partial (19%)			168	PPPPPYKYPS	10	10.3	22	130
1	Fabaceae	Glycine	max	TC	TC348651 3 [Glycine max 14] TC348651 homologue to UniRef100_Q39835 Cluster: Extensin; n=1; Glycine max|Rep: Extensin - Glycine max (Soybean), partial (44%)			244	PPPPPYKYPS	10	6.1	123	183
1	Fabaceae	Glycine	max	TC	BM178209 2 [Glycine max 14] BM178209 similar to UniRef100_Q39835 Cluster: Extensin; n=1; Glycine max|Rep: Extensin - Glycine max (Soybean), partial (23%)			126	PPPPPYKYPS	10	8.5	35	125
1	Fabaceae	Glycine	max	TC	BQ743099 3 [Glycine max 14] BQ743099 similar to UniRef100_Q09083 Cluster: Hydroxyproline-rich glycoprotein precursor; n=1; Phaseolus vulgaris|Rep: Hydroxyproline-rich glycoprotein precursor - Phaseolus vulgaris (Kidney bean) (French bean), partial (18%)			112	PPPPPYKYPS	10	6.1	0	63
1	Fabaceae	Glycine	max	TC	CF808022 2 [Glycine max 14] CF808022 similar to UniRef100_Q39835 Cluster: Extensin; n=1; Glycine max|Rep: Extensin - Glycine max (Soybean), partial (32%)			184	PPPPPYKYPS	10	6	96	158
1	Fabaceae	Trifolium	pratense	TA	BB929761 2 [Trifolium pratense release] BB929761			152	PPPPPYKYPS	10	3.7	115	151
1	Fabaceae	Trifolium	pratense	TA	BB930637 3 [Trifolium pratense release] BB930637			75	PPPPPYKYPS	10	3.8	32	69
1	Fabaceae	Trifolium	pratense	TA	BB931131 2 [Trifolium pratense release] BB931131 LacZ protein [Escherichia coli]			130	PPPPPYKYPS	10	2	38	57
1	Fabaceae	Trifolium	pratense	TA	BB932056 1 [Trifolium pratense release] BB932056			293	PPPPPYKYPS	10	3.8	148	185
1	Fabaceae	Trifolium	pratense	TA	BB932871 1 [Trifolium pratense release] BB932871			249	PPPPPYKYPS	10	3.4	39	72
1	Fabaceae	Trifolium	pratense	TA	BB935929 2 [Trifolium pratense release] BB935929			258	PPPPPYKYPS	10	4.9	39	91
1	Fabaceae	Trifolium	pratense	TA	BB936773 2 [Trifolium pratense release] BB936773 Extensin precusor [Arabidopsis thaliana (Mouse-ear cress)]			105	PPPPPYKYPS	10	5.4	46	102
1	Fabaceae	Trifolium	pratense	TA	BB939369 2 [Trifolium pratense release] BB939369 Putative heat shock protein; 32627-30541 [Arabidopsis thaliana (Mouse-ear cress)]			221	PPPPPYKYPS	10	2	9	28
1	Fabaceae	Glycine	max	TC	TC301541 3 [Glycine max 14] TC301541 similar to UniRef100_Q39835 Cluster: Extensin; n=1; Glycine max|Rep: Extensin - Glycine max (Soybean), partial (37%)			286	PPPYKYKSPP	10	13.2	39	183
1	Fabaceae	Glycine	max	TC	CF808022 3 [Glycine max 14] CF808022 similar to UniRef100_Q39835 Cluster: Extensin; n=1; Glycine max|Rep: Extensin - Glycine max (Soybean), partial (32%)			183	PPPYKYKSPP	10	5.3	39	96
1	Vitaceae	Vitis	vinifera	TC	TC92722 2 [Vitis vinifera 6] TC92722 similar to UniRef100_Q09083 Cluster: Hydroxyproline-rich glycoprotein precursor; n=1; Phaseolus vulgaris|Rep: Hydroxyproline-rich glycoprotein precursor - Phaseolus vulgaris (Kidney bean) (French bean), partial (49%)			513	PPPYKYKSPP	10	7.4	94	179
1	Vitaceae	Vitis	vinifera	TC	TC98462 2 [Vitis vinifera 6] TC98462			453	PPPYKYKSPP	10	7.4	227	312
1	Euphorbiaceae	Euphorbia	tirucalli	TA	TA1122_142860 1 [Euphorbia tirucalli release] TA1122_142860 Extensin precusor [Arabidopsis thaliana (Mouse-ear cress)]			202	PPPYKYKSPP	10	6.9	31	105
1	Euphorbiaceae	Euphorbia	tirucalli	TA	TA1123_142860 3 [Euphorbia tirucalli release] TA1123_142860 Extensin precusor [Arabidopsis thaliana (Mouse-ear cress)]			196	PPPYKYKSPP	10	5.7	10	71
1	Euphorbiaceae	Euphorbia	tirucalli	TA	BP959594 3 [Euphorbia tirucalli release] BP959594 Extensin precusor [Arabidopsis thaliana (Mouse-ear cress)]			199	PPPYKYKSPP	10	6.7	54	125
1	Fabaceae	Trifolium	pratense	TA	TA312_57577 2 [Trifolium pratense release] TA312_57577			79	PPPYKYKSPP	10	4.5	34	78
1	Fabaceae	Glycine	max	TC	TC334393 2 [Glycine max 14] TC334393 homologue to UniRef100_Q39835 Cluster: Extensin; n=1; Glycine max|Rep: Extensin - Glycine max (Soybean), partial (34%)			222	PPPPVYKYHS	10	11.3	33	145
1	Fabaceae	Trifolium	pratense	TA	BB933285 2 [Trifolium pratense release] BB933285 Extensin precusor [Arabidopsis thaliana (Mouse-ear cress)]			286	PPPPVYKYHS	10	6.7	14	83
1	Marchantiaceae	Marchantia	polymorpha	TA	TA3523_3197 3 [Marchantia polymorpha release] TA3523_3197 Extensin precusor [Arabidopsis thaliana (Mouse-ear cress)]			275	PPVYEYKSPP	10	10.3	136	238
1	Marchantiaceae	Marchantia	polymorpha	TA	BJ847079 2 [Marchantia polymorpha release] BJ847079 Extensin precusor [Arabidopsis thaliana (Mouse-ear cress)]			260	PPVYEYKSPP	10	12	140	259
1	Marchantiaceae	Marchantia	polymorpha	TA	BJ850666 2 [Marchantia polymorpha release] BJ850666 Extensin precusor [Arabidopsis thaliana (Mouse-ear cress)]			154	PPVYEYKSPP	10	6.9	0	68
1	Rubiaceae	Coffea	canephora	TC	DV703997 2 [Coffea canephora 1] DV703997 similar to UniRef100_Q9M6R7 Cluster: Extensin; n=1; Pisum sativum|Rep: Extensin - Pisum sativum (Garden pea), partial (41%)			180	PPPPVYKSPP	10	4.3	92	134
1	Asteraceae	Lactuca	sativa	TC	TC26241 2 [Lactuca sativa 3] TC26241 similar to UniRef100_Q40402 Cluster: Extensin (ext) precursor; n=1; Nicotiana plumbaginifolia|Rep: Extensin (ext) precursor - Nicotiana plumbaginifolia (Leadwort-leaved tobacco), partial (40%)			183	PPPPVYKSPP	10	13.5	36	176
1	Asteraceae	Lactuca	sativa	TC	TC26465 2 [Lactuca sativa 3] TC26465 homologue to UniRef100_Q38913 Cluster: Extensin-1 precursor; n=1; Arabidopsis thaliana|Rep: Extensin-1 precursor - Arabidopsis thaliana (Mouse-ear cress), partial (27%)			188	PPPPVYKSPP	10	9.2	84	177
1	Asteraceae	Lactuca	serriola	TC	TC7901 1 [Lactuca serriola 1] TC7901 homologue to UniRef100_Q40402 Cluster: Extensin (ext) precursor; n=1; Nicotiana plumbaginifolia|Rep: Extensin (ext) precursor - Nicotiana plumbaginifolia (Leadwort-leaved tobacco), partial (22%)			99	PPPPVYKSPP	10	9.1	0	92
1	Rosaceae	Malus	domestica	TC	TC36239 2 [Malus domestica x] TC36239 similar to UniRef100_Q40768 Cluster: Extensin precursor; n=1; Prunus dulcis|Rep: Extensin precursor - Prunus dulcis (Almond) (Prunus amygdalus), partial (48%)			254	PPPPVYKSPP	10	3	85	114
1	Rosaceae	Malus	domestica	TC	TC46836 2 [Malus domestica x] TC46836 homologue to UniRef100_Q40768 Cluster: Extensin precursor; n=1; Prunus dulcis|Rep: Extensin precursor - Prunus dulcis (Almond) (Prunus amygdalus), partial (32%)			203	PPPPVYKSPP	10	3	44	73
1	Rosaceae	Malus	domestica	TC	TC54195 3 [Malus domestica x] TC54195 homologue to UniRef100_Q40768 Cluster: Extensin precursor; n=1; Prunus dulcis|Rep: Extensin precursor - Prunus dulcis (Almond) (Prunus amygdalus), partial (21%)			194	PPPPVYKSPP	10	3	35	64
1	Rosaceae	Malus	domestica	TC	TC42875 3 [Malus domestica x] TC42875 similar to UniRef100_A4QMB9 Cluster: ORF124; n=1; Pinus koraiensis|Rep: ORF124 - Pinus koraiensis (Korean pine), complete			396	PPPPVYKSPP	10	3	214	243
1	Rosaceae	Malus	domestica	TC	CO414769 2 [Malus domestica x] CO414769 similar to UniRef100_Q40768 Cluster: Extensin precursor; n=1; Prunus dulcis|Rep: Extensin precursor - Prunus dulcis (Almond) (Prunus amygdalus), partial (45%)			193	PPPPVYKSPP	10	3	77	106
1	Rosaceae	Malus	domestica	TC	CN910195 1 [Malus domestica x] CN910195 similar to UniRef100_Q40768 Cluster: Extensin precursor; n=1; Prunus dulcis|Rep: Extensin precursor - Prunus dulcis (Almond) (Prunus amygdalus), partial (66%)			192	PPPPVYKSPP	10	3	153	182
1	Solanaceae	Nicotiana	tabacum	TC	TC67904 2 [Nicotiana tabacum 5] TC67904 homologue to UniRef100_Q9FSG0 Cluster: Extensin precursor; n=1; Nicotiana sylvestris|Rep: Extensin precursor - Nicotiana sylvestris (Wood tobacco), partial (61%)			214	PPPPVYKSPP	10	6	41	101
1	Solanaceae	Nicotiana	tabacum	TC	TC67904 2 [Nicotiana tabacum 5] TC67904 homologue to UniRef100_Q9FSG0 Cluster: Extensin precursor; n=1; Nicotiana sylvestris|Rep: Extensin precursor - Nicotiana sylvestris (Wood tobacco), partial (61%)			214	PPPPVYKSPP	10	5.3	35	88
1	Salicaceae	Populus	trichocarpa	TC	TC109538 3 [Populus trichocarpa NoSp] TC109538 similar to UniRef100_P06599 Cluster: Extensin precursor; n=1; Daucus carota|Rep: Extensin precursor - Daucus carota (Carrot), partial (63%)			394	PPPPVYKSPP	10	4.7	156	205
1	Salicaceae	Populus	trichocarpa	TC	TC110378 3 [Populus trichocarpa NoSp] TC110378 similar to UniRef100_Q9M6R7 Cluster: Extensin; n=1; Pisum sativum|Rep: Extensin - Pisum sativum (Garden pea), partial (56%)			295	PPPPVYKSPP	10	4.7	117	166
1	Salicaceae	Populus	trichocarpa	TC	TC121766 2 [Populus trichocarpa NoSp] TC121766 similar to UniRef100_Q39599 Cluster: Extensin; n=1; Catharanthus roseus|Rep: Extensin - Catharanthus roseus (Rosy periwinkle) (Madagascar periwinkle), partial (37%)			201	PPPPVYKSPP	10	4.7	12	61
1	Salicaceae	Populus	trichocarpa	TC	TC137970 2 [Populus trichocarpa NoSp] TC137970 similar to UniRef100_Q39599 Cluster: Extensin; n=1; Catharanthus roseus|Rep: Extensin - Catharanthus roseus (Rosy periwinkle) (Madagascar periwinkle), partial (56%)			232	PPPPVYKSPP	10	13.4	0	147
1	Salicaceae	Populus	trichocarpa	TC	TC135434 2 [Populus trichocarpa NoSp] TC135434 similar to UniRef100_Q39599 Cluster: Extensin; n=1; Catharanthus roseus|Rep: Extensin - Catharanthus roseus (Rosy periwinkle) (Madagascar periwinkle), partial (46%)			236	PPPPVYKSPP	10	4.7	37	86
1	Salicaceae	Populus	trichocarpa	TC	CX171860 3 [Populus trichocarpa NoSp] CX171860 similar to UniRef100_P06599 Cluster: Extensin precursor; n=1; Daucus carota|Rep: Extensin precursor - Daucus carota (Carrot), partial (38%)			205	PPPPVYKSPP	10	5	24	75
1	Salicaceae	Populus	trichocarpa	TC	CX654370 2 [Populus trichocarpa NoSp] CX654370 similar to UniRef100_P06599 Cluster: Extensin precursor; n=1; Daucus carota|Rep: Extensin precursor - Daucus carota (Carrot), partial (20%)			133	PPPPVYKSPP	10	3	2	31
1	Salicaceae	Populus	trichocarpa	TC	CX167737 1 [Populus trichocarpa NoSp] CX167737 similar to UniRef100_P06599 Cluster: Extensin precursor; n=1; Daucus carota|Rep: Extensin precursor - Daucus carota (Carrot), partial (47%)			211	PPPPVYKSPP	10	4.7	79	128
1	Salicaceae	Populus	deltoides	TA	TA2059_3696 2 [Populus deltoides release] TA2059_3696 Extensin precusor [Arabidopsis thaliana (Mouse-ear cress)]			312	PPPPVYKSPP	10	4.7	223	272
1	Salicaceae	Populus	deltoides	TA	TA2060_3696 3 [Populus deltoides release] TA2060_3696 Extensin precusor [Arabidopsis thaliana (Mouse-ear cress)]			356	PPPPVYKSPP	10	6.6	145	220
1	Salicaceae	Populus	deltoides	TA	CX167737 1 [Populus deltoides release] CX167737 Extensin precusor [Arabidopsis thaliana (Mouse-ear cress)]			211	PPPPVYKSPP	10	4.7	79	128
1	Salicaceae	Populus	deltoides	TA	CX169094 2 [Populus deltoides release] CX169094 Extensin precusor [Arabidopsis thaliana (Mouse-ear cress)]			183	PPPPVYKSPP	10	4.7	37	86
1	Salicaceae	Populus	deltoides	TA	CX171380 1 [Populus deltoides release] CX171380 Extensin precusor [Arabidopsis thaliana (Mouse-ear cress)]			207	PPPPVYKSPP	10	3.9	85	125
1	Salicaceae	Populus	deltoides	TA	CX171380 1 [Populus deltoides release] CX171380 Extensin precusor [Arabidopsis thaliana (Mouse-ear cress)]			207	PPPPVYKSPP	10	4.7	29	78
1	Salicaceae	Populus	deltoides	TA	CX171860 3 [Populus deltoides release] CX171860 Extensin precusor [Arabidopsis thaliana (Mouse-ear cress)]			205	PPPPVYKSPP	10	5	24	75
1	Salicaceae	Populus	deltoides	TA	CX172172 2 [Populus deltoides release] CX172172 Extensin precusor [Arabidopsis thaliana (Mouse-ear cress)]			167	PPPPVYKSPP	10	4.7	12	61
1	Apocynaceae	Catharanthus	roseus	TA	TA81_4058 2 [Catharanthus roseus release] TA81_4058 Cluster: Hypothetical protein F28B23.10; n=1; Arabidopsis thaliana|Rep: Hypothetical protein F28B23.10 - Arabidopsis thaliana (Mouse-ear cress)			312	PPPPVYKSPP	10	9.3	68	164
1	Apocynaceae	Catharanthus	roseus	TA	TA954_4058 2 [Catharanthus roseus release] TA954_4058 Cluster: Hypothetical protein F28B23.10; n=1; Arabidopsis thaliana|Rep: Hypothetical protein F28B23.10 - Arabidopsis thaliana (Mouse-ear cress)			353	PPPPVYKSPP	10	6.8	33	103
1	Asteraceae	Lactuca	virosa	TA	DW172847 3 [Lactuca virosa release] DW172847 Extensin precusor [Arabidopsis thaliana (Mouse-ear cress)]			176	PPPPVHKSPP	10	5	118	175
1	Brassicaceae	Arabidopsis	thaliana	NR	gi|15222667|ref|NP_173948.1| proline-rich extensin-like family protein [Arabidopsis thaliana] gi|12321183|gb|AAG50685.1|AC079829_18 hypothetical protein [Arabidopsis thaliana]	AT1G26240	EXT19	478	PPPYVYKSPP	10	44.3	30	475
1	Brassicaceae	Arabidopsis	thaliana	NR	gi|15236479|ref|NP_192577.1| proline-rich extensin-like family protein [Arabidopsis thaliana] gi|5731758|emb|CAB52559.1| extensin-like protein [Arabidopsis thaliana] gi|7267478|emb|CAB77962.1| extensin-like protein [Arabidopsis thaliana]	AT4G08370	EXT20	350	PPPYVYKSPP	10	9	33	124
1	Brassicaceae	Arabidopsis	thaliana	NR	gi|15222668|ref|NP_173949.1| proline-rich extensin, putative [Arabidopsis thaliana] gi|12321180|gb|AAG50682.1|AC079829_15 unknown protein [Arabidopsis thaliana]	AT1G26250	EXT18	443	PPPYVYSSPP	10	40.2	35	440
1	Brassicaceae	Brassica	oleracea	NR	gi|89257636|gb|ABD65124.1| extensin, putative [Brassica oleracea]			509	PPPYVYSSPP	10	4.2	366	411
1	Solanaceae	Nicotiana	sylvestris	NR	gi|11121502|emb|CAC14888.1| putative extensin [Nicotiana sylvestris]			311	PPVYKYKSPP	10	27.7	29	310
1	Solanaceae	Nicotiana	sylvestris	NR	gi|1165128|emb|CAA49808.1| extensin [Nicotiana sylvestris]			131	PPVYKYKSPP	10	9.3	23	117
1	Solanaceae	Nicotiana	sylvestris	NR	gi|11121504|emb|CAC14889.1| extensin [Nicotiana sylvestris]			161	PPVYKYKSPP	10	12.7	29	160
1	Solanaceae	Solanum	tuberosum	NR	gi|24745586|dbj|BAC23027.1| extensin [Solanum tuberosum]			152	PPVYKYKSPP	10	7.9	57	137
1	Solanaceae	Solanum	tuberosum	NR	gi|24745591|dbj|BAC23028.1| hydroxyproline-rich glycoprotein [Solanum tuberosum]			217	PPVYKYKSPP	10	19.7	0	204
1	Fabaceae	Pisum	sativum	NR	gi|37051103|dbj|BAC81648.1| hydroxyproline-rich glycoprotein-3 [Pisum sativum]			137	PPVYKYKSPP	10	9	0	95
1	Fabaceae	Glycine	max	NR	gi|6062868|gb|AAF03043.1| unknown [Glycine max]			102	PPVYKYKSPP	10	5.7	6	65
1	Fabaceae	Pisum	sativum	NR	gi|8132441|gb|AAF73291.1|AF155232_1 extensin [Pisum sativum]			327	PPVYKYKSPP	10	16.7	116	291
1	Apocynaceae	Catharanthus	roseus	NR	gi|1486263|dbj|BAA13175.1| extensin [Catharanthus roseus]			225	PPPPVYKSPP	10	6.8	29	99
1	Solanaceae	Nicotiana	tabacum	NR	gi|68687857|emb|CAI78907.1| putative extensin [Nicotiana tabacum]			57	PPPPVYKSPP	10	5.4	0	54
1	Fabaceae	Lotus	japonicus	TC	TC40993 1 [Lotus japonicus 5] TC40993 homologue to UniRef100_Q9M6R7 Cluster: Extensin; n=1; Pisum sativum|Rep: Extensin - Pisum sativum (Garden pea), partial (25%)			198	PPPYKYKSPPP	11	3.73	4	46
1	Salicaceae	Populus	trichocarpa	TC	TC106787 3 [Populus trichocarpa NoSp] TC106787 similar to UniRef100_Q39835 Cluster: Extensin; n=1; Glycine max|Rep: Extensin - Glycine max (Soybean), partial (35%)			286	PPPYKYKSPPP	11	11.55	11	146
1	Salicaceae	Populus	trichocarpa	TC	CX177646 2 [Populus trichocarpa NoSp] CX177646 similar to UniRef100_Q39835 Cluster: Extensin; n=1; Glycine max|Rep: Extensin - Glycine max (Soybean), partial (43%)			199	PPPYKYKSPPP	11	17	4	198
1	Vitaceae	Vitis	vinifera	TC	TC91543 2 [Vitis vinifera 6] TC91543 similar to UniRef100_Q39600 Cluster: Extensin; n=1; Catharanthus roseus|Rep: Extensin - Catharanthus roseus (Rosy periwinkle) (Madagascar periwinkle), partial (63%)			269	PPPYKYKSPPP	11	5.27	103	165
1	Vitaceae	Vitis	vinifera	TC	TC92722 1 [Vitis vinifera 6] TC92722 similar to UniRef100_Q09083 Cluster: Hydroxyproline-rich glycoprotein precursor; n=1; Phaseolus vulgaris|Rep: Hydroxyproline-rich glycoprotein precursor - Phaseolus vulgaris (Kidney bean) (French bean), partial (49%)			514	PPPYKYKSPPP	11	5.64	263	326
1	Vitaceae	Vitis	vinifera	TC	TC92722 2 [Vitis vinifera 6] TC92722 similar to UniRef100_Q09083 Cluster: Hydroxyproline-rich glycoprotein precursor; n=1; Phaseolus vulgaris|Rep: Hydroxyproline-rich glycoprotein precursor - Phaseolus vulgaris (Kidney bean) (French bean), partial (49%)			513	PPPYKYKSPPP	11	7.73	327	414
1	Vitaceae	Vitis	vinifera	TC	TC100097 3 [Vitis vinifera 6] TC100097 similar to UniRef100_Q8H9E0 Cluster: Hydroxyproline-rich glycoprotein; n=1; Solanum tuberosum|Rep: Hydroxyproline-rich glycoprotein - Solanum tuberosum (Potato), partial (43%)			205	PPPYKYKSPPP	11	8.27	0	96
1	Vitaceae	Vitis	vinifera	TC	TC98462 2 [Vitis vinifera 6] TC98462			453	PPPYKYKSPPP	11	5.27	345	407
1	Vitaceae	Vitis	vinifera	TC	CF605538 1 [Vitis vinifera 6] CF605538			174	PPPYKYKSPPP	11	5.27	91	153
1	Salicaceae	Populus	x	TA	CX177646 2 [Populus x canadensis] CX177646 Extensin precusor [Arabidopsis thaliana (Mouse-ear cress)]			199	PPPYKYKSPPP	11	17	4	198
1	Salicaceae	Populus	x	TA	CX179364 3 [Populus x canadensis] CX179364 Extensin precusor [Arabidopsis thaliana (Mouse-ear cress)]			230	PPPYKYKSPPP	11	11.55	11	146
1	Salicaceae	Populus	x	TA	CX180339 3 [Populus x canadensis] CX180339 Extensin precusor [Arabidopsis thaliana (Mouse-ear cress)]			201	PPPYKYKSPPP	11	11.91	6	145
1	Vitaceae	Vitis	vinifera	NR	gi|225463897|ref|XP_002264360.1| PREDICTED: hypothetical protein [Vitis vinifera]			377	PPPYKYKSPPP	11	18.73	160	373
1	Rubiaceae	Coffea	canephora	TC	EE193280 2 [Coffea canephora 1] EE193280 homologue to UniRef100_Q9FSG0 Cluster: Extensin precursor; n=1; Nicotiana sylvestris|Rep: Extensin precursor - Nicotiana sylvestris (Wood tobacco), partial (30%)			91	PPPPVYKYKSPP	12	4	0	47
1	Rosaceae	Malus	domestica	TC	CN880035 1 [Malus domestica x] CN880035 homologue to UniRef100_Q40415 Cluster: Extensin; n=2; Nicotiana|Rep: Extensin - Nicotiana sylvestris (Wood tobacco), partial (40%)			148	PPPPVYKYKSPP	12	3.17	0	37
1	Solanaceae	Petunia	hybrida	TC	CV299578 2 [Petunia hybrida 2] CV299578 homologue to UniRef100_Q8H9E0 Cluster: Hydroxyproline-rich glycoprotein; n=1; Solanum tuberosum|Rep: Hydroxyproline-rich glycoprotein - Solanum tuberosum (Potato), partial (20%)			148	PPPPVYKYKSPP	12	3.33	0	39
1	Salicaceae	Populus	trichocarpa	TC	TC106555 3 [Populus trichocarpa NoSp] TC106555 similar to UniRef100_Q09083 Cluster: Hydroxyproline-rich glycoprotein precursor; n=1; Phaseolus vulgaris|Rep: Hydroxyproline-rich glycoprotein precursor - Phaseolus vulgaris (Kidney bean) (French bean), partial (43%)			470	PPPPVYKYKSPP	12	7	240	327
1	Salicaceae	Populus	trichocarpa	TC	TC108756 2 [Populus trichocarpa NoSp] TC108756 similar to UniRef100_P06599 Cluster: Extensin precursor; n=1; Daucus carota|Rep: Extensin precursor - Daucus carota (Carrot), partial (74%)			302	PPPPVYKYKSPP	12	10.67	110	244
1	Malvaceae	Theobroma	cacao	TC	TC12681 2 [Theobroma cacao 3] TC12681 similar to UniRef100_Q39600 Cluster: Extensin; n=1; Catharanthus roseus|Rep: Extensin - Catharanthus roseus (Rosy periwinkle) (Madagascar periwinkle), partial (35%)			186	PPPPVYKYKSPP	12	5.33	1	64
1	Vitaceae	Vitis	vinifera	TC	TC91543 2 [Vitis vinifera 6] TC91543 similar to UniRef100_Q39600 Cluster: Extensin; n=1; Catharanthus roseus|Rep: Extensin - Catharanthus roseus (Rosy periwinkle) (Madagascar periwinkle), partial (63%)			269	PPPPVYKYKSPP	12	3.17	45	82
1	Vitaceae	Vitis	vinifera	TC	TC98462 2 [Vitis vinifera 6] TC98462			453	PPPPVYKYKSPP	12	5.25	103	165
1	Rubiaceae	Coffea	arabica	TA	CF588841 2 [Coffea arabica release] CF588841 Extensin precusor [Arabidopsis thaliana (Mouse-ear cress)]			118	PPPPVYKYKSPP	12	3.58	0	42
1	Ginkgoaceae	Ginkgo	biloba	TA	DR073904 2 [Ginkgo biloba release] DR073904 Extensin precusor [Arabidopsis thaliana (Mouse-ear cress)]			115	PPPPVYKYKSPP	12	9	3	113
1	Rubiaceae	Hedyotis	centranthoides	TA	CB085393 3 [Hedyotis centranthoides release] CB085393 Extensin precusor [Arabidopsis thaliana (Mouse-ear cress)]			122	PPPPVYKYKSPP	12	2.42	0	28
1	Magnoliaceae	Liriodendron	tulipifera	TA	TA1560_3415 1 [Liriodendron tulipifera release] TA1560_3415 Extensin precusor [Arabidopsis thaliana (Mouse-ear cress)]			192	PPPPVYKYKSPP	12	3.92	16	71
1	Euphorbiaceae	Manihot	esculenta	TA	CK646702 3 [Manihot esculenta release] CK646702 Extensin precusor [Arabidopsis thaliana (Mouse-ear cress)]			170	PPPPVYKYKSPP	12	5.83	0	71
1	Euphorbiaceae	Manihot	esculenta	TA	CK649576 2 [Manihot esculenta release] CK649576 Extensin precusor [Arabidopsis thaliana (Mouse-ear cress)]			145	PPPPVYKYKSPP	12	2.67	67	98
1	Euphorbiaceae	Manihot	esculenta	TA	CK650410 3 [Manihot esculenta release] CK650410 Extensin precusor [Arabidopsis thaliana (Mouse-ear cress)]			150	PPPPVYKYKSPP	12	8.67	7	112
1	Solanaceae	Nicotiana	sylvestris	TA	TA808_4096 2 [Nicotiana sylvestris release] TA808_4096 Extensin precusor [Arabidopsis thaliana (Mouse-ear cress)]			54	PPPPVYKYKSPP	12	3.83	4	49
1	Lauraceae	Persea	americana	TA	CV003518 2 [Persea americana release] CV003518 Extensin precusor [Arabidopsis thaliana (Mouse-ear cress)]			79	PPPPVYKYKSPP	12	5.17	12	78
1	Salicaceae	Populus	x	TA	CX187427 3 [Populus x canadensis] CX187427 Extensin precusor [Arabidopsis thaliana (Mouse-ear cress)]			202	PPPPVYKYKSPP	12	7.25	108	197
1	Euphorbiaceae	Ricinus	communis	TA	TA1011_3988 2 [Ricinus communis release] TA1011_3988 Extensin precusor [Arabidopsis thaliana (Mouse-ear cress)]			383	PPPPVYKYKSPP	12	20.5	31	276
1	Euphorbiaceae	Ricinus	communis	TA	EG690136 1 [Ricinus communis release] EG690136 Extensin precusor [Arabidopsis thaliana (Mouse-ear cress)]			194	PPPPVYKYKSPP	12	3.92	0	51
1	Ericaceae	Vaccinium	corymbosum	TA	TA676_69266 1 [Vaccinium corymbosum release] TA676_69266 Extensin precusor [Arabidopsis thaliana (Mouse-ear cress)]			203	PPPPVYKYKSPP	12	6.83	7	93
1	Ericaceae	Vaccinium	corymbosum	TA	CF811358 3 [Vaccinium corymbosum release] CF811358 Extensin precusor [Arabidopsis thaliana (Mouse-ear cress)]			162	PPPPVYKYKSPP	12	4.5	7	60
1	Rhizophoraceae	Bruguiera	gymnorrhiza	TA	BP948960 1 [Bruguiera gymnorrhiza release] BP948960 Extensin precusor [Arabidopsis thaliana (Mouse-ear cress)]			55	PPPPVYKYKSPP	12	3.25	16	54
1	Salicaceae	Populus	trichocarpa	NR	gi|224082422|ref|XP_002306688.1| predicted protein [Populus trichocarpa] gi|222856137|gb|EEE93684.1| predicted protein [Populus trichocarpa]			173	PPPPVYKYKSPP	12	3.33	102	141
1	Vitaceae	Vitis	vinifera	NR	gi|225463897|ref|XP_002264360.1| PREDICTED: hypothetical protein [Vitis vinifera]			377	PPPPVYKYKSPP	12	5.25	36	98
1	Fabaceae	Glycine	max	TC	TC301532 3 [Glycine max 14] TC301532 similar to UniRef100_Q41707 Cluster: Extensin class 1 protein precursor; n=2; Vigna unguiculata|Rep: Extensin class 1 protein precursor - Vigna unguiculata (Cowpea), partial (69%)			441	PTPYYYKSPPPPS	13	9.62	316	440
1	Fabaceae	Glycine	max	TC	TC312023 2 [Glycine max 14] TC312023 similar to UniRef100_Q40793 Cluster: Tyrosine-rich hydroxyproline-rich glycoprotein; n=1; Petroselinum crispum|Rep: Tyrosine-rich hydroxyproline-rich glycoprotein - Petroselinum crispum (Parsley) (Petroselinum hortense), partial (56%)			201	PTPYYYKSPPPPS	13	3.85	0	49
1	Pedaliaceae	Sesamum	indicum	TA	BU667505 3 [Sesamum indicum release] BU667505 Extensin precusor [Arabidopsis thaliana (Mouse-ear cress)]			95	PPLYKYKSPPPPP	13	4	42	93
1	Acanthaceae	Avicennia	marina	TA	BM173005 2 [Avicennia marina release] BM173005 Extensin precusor [Arabidopsis thaliana (Mouse-ear cress)]			119	KKPYVYKSPPPPP	13	5.38	3	72
1	Pedaliaceae	Sesamum	indicum	TA	BU668767 3 [Sesamum indicum release] BU668767 Extensin precusor [Arabidopsis thaliana (Mouse-ear cress)]			120	KKPYVYKSPPPPP	13	6.31	36	117
1	Asteraceae	Helianthus	annuus	TC	TC59345 1 [Helianthus annuus 6] TC59345 similar to UniRef100_Q9FS16 Cluster: Extensin-3 precursor; n=1; Arabidopsis thaliana|Rep: Extensin-3 precursor - Arabidopsis thaliana (Mouse-ear cress), partial (59%)			423	KEHYVYKSPPPPPP	14	5.14	151	222
1	Asteraceae	Helianthus	annuus	TC	BQ916631 3 [Helianthus annuus 6] BQ916631 homologue to UniRef100_Q70Q37 Cluster: Hydroxycinnamoyl-CoA hydroxycinnamoyltransferase; n=1; Nicotiana benthamiana|Rep: Hydroxycinnamoyl-CoA hydroxycinnamoyltransferase - Nicotiana benthamiana, partial (32%)			198	KEHYVYKSPPPPPP	14	7	100	197
1	Asteraceae	Helianthus	annuus	TC	TC56142 2 [Helianthus annuus 6] TC56142 similar to UniRef100_Q9FS16 Cluster: Extensin-3 precursor; n=1; Arabidopsis thaliana|Rep: Extensin-3 precursor - Arabidopsis thaliana (Mouse-ear cress), partial (53%)			361	KEHYVYKSPPPPPP	14	7.57	241	346
1	Asteraceae	Helianthus	annuus	TC	TC56142 3 [Helianthus annuus 6] TC56142 similar to UniRef100_Q9FS16 Cluster: Extensin-3 precursor; n=1; Arabidopsis thaliana|Rep: Extensin-3 precursor - Arabidopsis thaliana (Mouse-ear cress), partial (53%)			360	KEHYVYKSPPPPPP	14	7.43	130	233
1	Asteraceae	Helianthus	annuus	TC	BU024464 1 [Helianthus annuus 6] BU024464 similar to UniRef100_Q39949 Cluster: Hydroxyproline-rich protein; n=1; Helianthus annuus|Rep: Hydroxyproline-rich protein - Helianthus annuus (Common sunflower), partial (39%)			251	KEHYVYKSPPPPPP	14	7.5	113	217
1	Asteraceae	Helianthus	annuus	TC	BQ916031 1 [Helianthus annuus 6] BQ916031 similar to UniRef100_Q9FS16 Cluster: Extensin-3 precursor; n=1; Arabidopsis thaliana|Rep: Extensin-3 precursor - Arabidopsis thaliana (Mouse-ear cress), partial (33%)			261	KEHYVYKSPPPPPP	14	10.5	114	260
1	Asteraceae	Helianthus	annuus	TC	BQ970240 3 [Helianthus annuus 6] BQ970240 similar to UniRef100_P06599 Cluster: Extensin precursor; n=1; Daucus carota|Rep: Extensin precursor - Daucus carota (Carrot), partial (32%)			201	KEHYVYKSPPPPPP	14	5.21	81	153
1	Asteraceae	Helianthus	annuus	TC	BU025689 2 [Helianthus annuus 6] BU025689 similar to UniRef100_Q9FS16 Cluster: Extensin-3 precursor; n=1; Arabidopsis thaliana|Rep: Extensin-3 precursor - Arabidopsis thaliana (Mouse-ear cress), partial (36%)			241	KEHYVYKSPPPPPP	14	12.64	59	235
1	Asteraceae	Helianthus	annuus	TC	BU026881 3 [Helianthus annuus 6] BU026881 similar to UniRef100_Q9FS16 Cluster: Extensin-3 precursor; n=1; Arabidopsis thaliana|Rep: Extensin-3 precursor - Arabidopsis thaliana (Mouse-ear cress), partial (31%)			177	KEHYVYKSPPPPPP	14	10.21	35	176
1	Asteraceae	Helianthus	annuus	TC	BU027429 2 [Helianthus annuus 6] BU027429 similar to UniRef100_Q9FS16 Cluster: Extensin-3 precursor; n=1; Arabidopsis thaliana|Rep: Extensin-3 precursor - Arabidopsis thaliana (Mouse-ear cress), partial (19%)			203	KEHYVYKSPPPPPP	14	4.86	112	179
1	Asteraceae	Taraxacum	officinale	TA	TA1214_50225 3 [Taraxacum officinale release] TA1214_50225 Extensin precusor [Arabidopsis thaliana (Mouse-ear cress)]			375	KKPYVYKSPPPPPP	14	13.14	94	277
1	Asteraceae	Taraxacum	officinale	TA	DY822986 3 [Taraxacum officinale release] DY822986 Extensin precusor [Arabidopsis thaliana (Mouse-ear cress)]			192	KKPYVYKSPPPPPP	14	6.79	0	94
1	Fabaceae	Glycine	max	TC	TC291041 2 [Glycine max 14] TC291041 homologue to UniRef100_Q41707 Cluster: Extensin class 1 protein precursor; n=2; Vigna unguiculata|Rep: Extensin class 1 protein precursor - Vigna unguiculata (Cowpea), partial (22%)			177	PPPYYYKSPPPPSPS	15	6	2	96
1	Fabaceae	Glycine	max	TC	FK018532 1 [Glycine max 14] FK018532 similar to UniRef100_Q43687 Cluster: Extensin-like protein; n=1; Vigna unguiculata|Rep: Extensin-like protein - Vigna unguiculata (Cowpea), partial (58%)			239	PPPYYYKSPPPPSPS	15	6.53	64	163
1	Rosaceae	Fragaria	vesca	TA	TA1999_57918 2 [Fragaria vesca release] TA1999_57918 Extensin precusor [Arabidopsis thaliana (Mouse-ear cress)]			522	KKPYHYKSPPPPPPP	15	7.67	134	254
1	Rosaceae	Fragaria	vesca	TA	TA2000_57918 3 [Fragaria vesca release] TA2000_57918 Extensin precusor [Arabidopsis thaliana (Mouse-ear cress)]			497	KKPYHYKSPPPPPPP	15	8.67	140	277
1	Rosaceae	Fragaria	vesca	TA	DV440473 2 [Fragaria vesca release] DV440473 Extensin precusor [Arabidopsis thaliana (Mouse-ear cress)]			330	KKPYHYKSPPPPPPP	15	5.67	0	87
1	Brassicaceae	Arabidopsis	thaliana	TC	TC323991 1 [Arabidopsis thaliana 14] TC323991 Strong similarity to extensin-like protein gb|Z34465 from Zea mays.	AT1G12040	LRX1	814	YYPPVTPSPPPPSPV	15	8.6	549	677
1	Brassicaceae	Brassica	rapa	TA	BG544142 3 [Brassica rapa release] BG544142 Extensin [Brassica napus (Rape)]			146	YAPPVYKSPPPPVKH	15	3.4	35	86
1	Brassicaceae	Arabidopsis	thaliana	TC	TC323949 2 [Arabidopsis thaliana 14] TC323949 UniRef100_UPI00001631D5 Cluster: LRX2 (LEUCINE-RICH REPEAT/EXTENSIN 2); protein binding / structural constituent of cell wall; n=1; Arabidopsis thaliana|Rep: LRX2 (LEUCINE-RICH REPEAT/EXTENSIN 2); protein binding / structural constituent of cell wall - Arabidopsis thaliana, complete			818	YYPPVTQSPPPPPPV	15	9.13	605	741
1	Brassicaceae	Arabidopsis	thaliana	TC	TC323950 1 [Arabidopsis thaliana 14] TC323950 UniRef100_O48809 Cluster: T3P18.1; n=1; Arabidopsis thaliana|Rep: T3P18.1 - Arabidopsis thaliana (Mouse-ear cress), complete	AT1G62440	LRX2	787	YYPPVTQSPPPPPPV	15	9.13	574	710
1	Brassicaceae	Brassica	rapa	TA	CV433488 2 [Brassica rapa release] CV433488			145	YYPPVTQSPPPPPPV	15	2.4	4	39
1	Brassicaceae	Arabidopsis	thaliana	NR	gi|15221178|ref|NP_172668.1| LRX1 (LEUCINE-RICH REPEAT/EXTENSIN 1); histidine phosphotransfer kinase/ protein binding / structural constituent of cell wall [Arabidopsis thaliana] gi|3157926|gb|AAC17609.1| Strong similarity to extensin-like protein gb|Z34465 from Zea mays. [Arabidopsis thaliana] gi|13809918|gb|AAK07681.1| leucine-rich repeat/extensin 1 [Arabidopsis thaliana]	AT1G12040	LRX1	744	YYPPVTPSPPPPSPV	15	8.6	537	665
1	Brassicaceae	Arabidopsis	thaliana	NR	gi|15220780|ref|NP_176434.1| LRX2 (LEUCINE-RICH REPEAT/EXTENSIN 2); protein binding / structural constituent of cell wall [Arabidopsis thaliana]			826	YYPPVTQSPPPPPPV	15	9.13	614	750
1	Brassicaceae	Arabidopsis	thaliana	NR	gi|5454187|gb|AAD43602.1|AC005698_1 T3P18.1 [Arabidopsis thaliana] gi|7940282|gb|AAF70841.1|AC003113_8 F24O1.18 [Arabidopsis thaliana]	AT1G62440	LRX2	786	YYPPVTQSPPPPPPV	15	9.13	574	710
1	Brassicaceae	Arabidopsis	thaliana	TC	TC326278 3 [Arabidopsis thaliana 14] TC326278 homologue to UniRef100_Q9M564 Cluster: CRANTZ hydroxyproline-rich glycoprotein; n=1; Manihot esculenta|Rep: CRANTZ hydroxyproline-rich glycoprotein - Manihot esculenta (Cassava) (Manioc), partial (74%)			348	SPPPPVKSPPPPYYYH	16	10.88	32	205
1	Brassicaceae	Arabidopsis	thaliana	TC	TC326279 3 [Arabidopsis thaliana 14] TC326279 homologue to UniRef100_Q9M564 Cluster: CRANTZ hydroxyproline-rich glycoprotein; n=1; Manihot esculenta|Rep: CRANTZ hydroxyproline-rich glycoprotein - Manihot esculenta (Cassava) (Manioc), partial (74%)			346	SPPPPVKSPPPPYYYH	16	10.88	32	205
1	Brassicaceae	Arabidopsis	thaliana	TC	TC326280 1 [Arabidopsis thaliana 14] TC326280 homologue to UniRef100_Q9M564 Cluster: CRANTZ hydroxyproline-rich glycoprotein; n=1; Manihot esculenta|Rep: CRANTZ hydroxyproline-rich glycoprotein - Manihot esculenta (Cassava) (Manioc), partial (49%)			281	SPPPPVKSPPPPYYYH	16	7.25	0	116
1	Brassicaceae	Arabidopsis	thaliana	TC	AV536803 2 [Arabidopsis thaliana 14] AV536803 homologue to UniRef100_Q9M564 Cluster: CRANTZ hydroxyproline-rich glycoprotein; n=1; Manihot esculenta|Rep: CRANTZ hydroxyproline-rich glycoprotein - Manihot esculenta (Cassava) (Manioc), partial (55%)			128	SPPPPVKSPPPPYYYH	16	7.94	1	127
1	Brassicaceae	Arabidopsis	thaliana	TC	AV552825 3 [Arabidopsis thaliana 14] AV552825 UniRef100_Q9M564 Cluster: CRANTZ hydroxyproline-rich glycoprotein; n=1; Manihot esculenta|Rep: CRANTZ hydroxyproline-rich glycoprotein - Manihot esculenta (Cassava) (Manioc), partial (69%)			159	SPPPPVKSPPPPYYYH	16	9.94	0	158
1	Brassicaceae	Arabidopsis	thaliana	TC	AV552086 2 [Arabidopsis thaliana 14] AV552086 homologue to UniRef100_Q9M564 Cluster: CRANTZ hydroxyproline-rich glycoprotein; n=1; Manihot esculenta|Rep: CRANTZ hydroxyproline-rich glycoprotein - Manihot esculenta (Cassava) (Manioc), partial (56%)			191	SPPPPVKSPPPPYYYH	16	8.06	0	129
1	Brassicaceae	Arabidopsis	thaliana	TC	AV546761 3 [Arabidopsis thaliana 14] AV546761 UniRef100_Q9M564 Cluster: CRANTZ hydroxyproline-rich glycoprotein; n=1; Manihot esculenta|Rep: CRANTZ hydroxyproline-rich glycoprotein - Manihot esculenta (Cassava) (Manioc), partial (21%)			49	SPPPPVKSPPPPYYYH	16	3.06	0	48
1	Brassicaceae	Arabidopsis	thaliana	TC	AV552335 2 [Arabidopsis thaliana 14] AV552335 UniRef100_Q9M564 Cluster: CRANTZ hydroxyproline-rich glycoprotein; n=1; Manihot esculenta|Rep: CRANTZ hydroxyproline-rich glycoprotein - Manihot esculenta (Cassava) (Manioc), partial (29%)			105	SPPPPVKSPPPPYYYH	16	4.19	0	66
1	Brassicaceae	Arabidopsis	thaliana	TC	BE522888 2 [Arabidopsis thaliana 14] BE522888 UniRef100_Q9M564 Cluster: CRANTZ hydroxyproline-rich glycoprotein; n=1; Manihot esculenta|Rep: CRANTZ hydroxyproline-rich glycoprotein - Manihot esculenta (Cassava) (Manioc), partial (46%)			107	SPPPPVKSPPPPYYYH	16	6.69	0	106
1	Brassicaceae	Arabidopsis	thaliana	TC	BX837881 3 [Arabidopsis thaliana 14] BX837881 similar to UniRef100_Q9M564 Cluster: CRANTZ hydroxyproline-rich glycoprotein; n=1; Manihot esculenta|Rep: CRANTZ hydroxyproline-rich glycoprotein - Manihot esculenta (Cassava) (Manioc), partial (51%)	AT2G43150	EXT21	181	SPPPPVKSPPPPYYYH	16	7.44	62	180
1	Brassicaceae	Arabidopsis	thaliana	TC	T41880 1 [Arabidopsis thaliana 14] T41880 homologue to UniRef100_Q9M564 Cluster: CRANTZ hydroxyproline-rich glycoprotein; n=1; Manihot esculenta|Rep: CRANTZ hydroxyproline-rich glycoprotein - Manihot esculenta (Cassava) (Manioc), partial (33%)			76	SPPPPVKSPPPPYYYH	16	4.75	0	75
1	Solanaceae	Solanum	tuberosum	TC	TC179138 2 [Solanum tuberosum 12] TC179138 homologue to UniRef100_Q09082 Cluster: Extensin; n=1; Solanum lycopersicum|Rep: Extensin - Solanum lycopersicum (Tomato) (Lycopersicon esculentum), partial (15%)			193	SPPPPVKSPPPPYYYH	16	2.75	1	44
1	Solanaceae	Solanum	tuberosum	TC	TC192104 2 [Solanum tuberosum 12] TC192104 homologue to UniRef100_Q09082 Cluster: Extensin; n=1; Solanum lycopersicum|Rep: Extensin - Solanum lycopersicum (Tomato) (Lycopersicon esculentum), partial (17%)			303	SPPPPVKSPPPPYYYH	16	3.88	89	150
1	Brassicaceae	Brassica	napus	TC	TC71796 1 [Brassica napus 3-1] TC71796 homologue to UniRef100_Q9M564 Cluster: CRANTZ hydroxyproline-rich glycoprotein; n=1; Manihot esculenta|Rep: CRANTZ hydroxyproline-rich glycoprotein - Manihot esculenta (Cassava) (Manioc), partial (56%)			269	SPPPPVKSPPPPYYYH	16	8.25	8	140
1	Brassicaceae	Brassica	napus	TC	TC77347 3 [Brassica napus 3-1] TC77347 homologue to UniRef100_Q9M564 Cluster: CRANTZ hydroxyproline-rich glycoprotein; n=1; Manihot esculenta|Rep: CRANTZ hydroxyproline-rich glycoprotein - Manihot esculenta (Cassava) (Manioc), partial (38%)			226	SPPPPVKSPPPPYYYH	16	5.75	0	91
1	Brassicaceae	Brassica	napus	TC	TC80107 1 [Brassica napus 3-1] TC80107 homologue to UniRef100_Q9M564 Cluster: CRANTZ hydroxyproline-rich glycoprotein; n=1; Manihot esculenta|Rep: CRANTZ hydroxyproline-rich glycoprotein - Manihot esculenta (Cassava) (Manioc), partial (43%)			236	SPPPPVKSPPPPYYYH	16	5.94	0	95
1	Brassicaceae	Brassica	napus	TC	TC81168 2 [Brassica napus 3-1] TC81168 homologue to UniRef100_Q9M564 Cluster: CRANTZ hydroxyproline-rich glycoprotein; n=1; Manihot esculenta|Rep: CRANTZ hydroxyproline-rich glycoprotein - Manihot esculenta (Cassava) (Manioc), partial (33%)			214	SPPPPVKSPPPPYYYH	16	4.88	0	77
1	Brassicaceae	Brassica	napus	TC	TC82723 1 [Brassica napus 3-1] TC82723 similar to UniRef100_Q9M564 Cluster: CRANTZ hydroxyproline-rich glycoprotein; n=1; Manihot esculenta|Rep: CRANTZ hydroxyproline-rich glycoprotein - Manihot esculenta (Cassava) (Manioc), partial (34%)			221	SPPPPVKSPPPPYYYH	16	4.88	10	87
1	Brassicaceae	Brassica	napus	TC	TC94627 2 [Brassica napus 3-1] TC94627 similar to UniRef100_Q09082 Cluster: Extensin; n=1; Solanum lycopersicum|Rep: Extensin - Solanum lycopersicum (Tomato) (Lycopersicon esculentum), partial (13%)			183	SPPPPVKSPPPPYYYH	16	2.38	0	37
1	Brassicaceae	Brassica	napus	TC	TC95151 2 [Brassica napus 3-1] TC95151 homologue to UniRef100_Q9M564 Cluster: CRANTZ hydroxyproline-rich glycoprotein; n=1; Manihot esculenta|Rep: CRANTZ hydroxyproline-rich glycoprotein - Manihot esculenta (Cassava) (Manioc), partial (50%)			223	SPPPPVKSPPPPYYYH	16	7.19	0	114
1	Brassicaceae	Brassica	napus	TC	TC103187 3 [Brassica napus 3-1] TC103187 similar to UniRef100_Q09083 Cluster: Hydroxyproline-rich glycoprotein precursor; n=1; Phaseolus vulgaris|Rep: Hydroxyproline-rich glycoprotein precursor - Phaseolus vulgaris (Kidney bean) (French bean), partial (22%)			220	SPPPPVKSPPPPYYYH	16	7.56	0	121
1	Brassicaceae	Brassica	napus	TC	TC110747 2 [Brassica napus 3-1] TC110747 homologue to UniRef100_Q9M564 Cluster: CRANTZ hydroxyproline-rich glycoprotein; n=1; Manihot esculenta|Rep: CRANTZ hydroxyproline-rich glycoprotein - Manihot esculenta (Cassava) (Manioc), partial (54%)			305	SPPPPVKSPPPPYYYH	16	8	53	181
1	Brassicaceae	Brassica	napus	TC	EV122620 2 [Brassica napus 3-1] EV122620 similar to UniRef100_Q9XFM6 Cluster: Membrane steroid-binding protein 1; n=1; Arabidopsis thaliana|Rep: Membrane steroid-binding protein 1 - Arabidopsis thaliana (Mouse-ear cress), partial (51%)			237	SPPPPVKSPPPPYYYH	16	3.06	0	51
1	Brassicaceae	Brassica	napus	TC	ES901965 2 [Brassica napus 3-1] ES901965 homologue to UniRef100_Q9M564 Cluster: CRANTZ hydroxyproline-rich glycoprotein; n=1; Manihot esculenta|Rep: CRANTZ hydroxyproline-rich glycoprotein - Manihot esculenta (Cassava) (Manioc), partial (60%)			158	SPPPPVKSPPPPYYYH	16	8.62	1	138
1	Brassicaceae	Brassica	napus	TC	EV079728 3 [Brassica napus 3-1] EV079728 gb|L24078.1|ACURG18S Acorus calamus L. 18S ribosomal RNA (18S rRNA) gene, 5 end, partial (5%)			159	SPPPPVKSPPPPYYYH	16	7.06	26	140
1	Brassicaceae	Brassica	napus	TC	EV121121 1 [Brassica napus 3-1] EV121121 homologue to UniRef100_Q9M564 Cluster: CRANTZ hydroxyproline-rich glycoprotein; n=1; Manihot esculenta|Rep: CRANTZ hydroxyproline-rich glycoprotein - Manihot esculenta (Cassava) (Manioc), partial (58%)			211	SPPPPVKSPPPPYYYH	16	9.06	0	144
1	Brassicaceae	Brassica	napus	TC	EV219985 3 [Brassica napus 3-1] EV219985 homologue to UniRef100_Q9M564 Cluster: CRANTZ hydroxyproline-rich glycoprotein; n=1; Manihot esculenta|Rep: CRANTZ hydroxyproline-rich glycoprotein - Manihot esculenta (Cassava) (Manioc), partial (90%)			218	SPPPPVKSPPPPYYYH	16	12.62	0	201
1	Brassicaceae	Brassica	napus	TC	EV121121 1 [Brassica napus 3-1] EV121121 homologue to UniRef100_Q9M564 Cluster: CRANTZ hydroxyproline-rich glycoprotein; n=1; Manihot esculenta|Rep: CRANTZ hydroxyproline-rich glycoprotein - Manihot esculenta (Cassava) (Manioc), partial (58%)			211	SPPPPVKSPPPPYYYH	16	7.75	17	140
1	Brassicaceae	Brassica	napus	TC	EV219985 3 [Brassica napus 3-1] EV219985 homologue to UniRef100_Q9M564 Cluster: CRANTZ hydroxyproline-rich glycoprotein; n=1; Manihot esculenta|Rep: CRANTZ hydroxyproline-rich glycoprotein - Manihot esculenta (Cassava) (Manioc), partial (90%)			218	SPPPPVKSPPPPYYYH	16	11.19	4	182
1	Brassicaceae	Brassica	napus	TC	EV126638 3 [Brassica napus 3-1] EV126638 homologue to UniRef100_Q9M564 Cluster: CRANTZ hydroxyproline-rich glycoprotein; n=1; Manihot esculenta|Rep: CRANTZ hydroxyproline-rich glycoprotein - Manihot esculenta (Cassava) (Manioc), partial (75%)			239	SPPPPVKSPPPPYYYH	16	10.81	61	233
1	Solanaceae	Capsicum	annuum	TC	CA523779 1 [Capsicum annuum 4] CA523779 similar to UniRef100_Q09082 Cluster: Extensin; n=1; Solanum lycopersicum|Rep: Extensin - Solanum lycopersicum (Tomato) (Lycopersicon esculentum), partial (16%)			156	SPPPPVKSPPPPYYYH	16	3.81	48	109
1	Euphorbiaceae	Manihot	esculenta	TA	TA3170_3983 1 [Manihot esculenta release] TA3170_3983 Extensin [Brassica napus (Rape)]			613	SPPPPVKSPPPPYYYH	16	13.31	227	439
1	Brassicaceae	Thellungiella	halophila	TA	BQ091950 2 [Thellungiella halophila release] BQ091950 Extensin [Brassica napus (Rape)]			100	SPPPPVKSPPPPYYYH	16	2.56	0	40
1	Brassicaceae	Brassica	oleracea	TA	AM391942 2 [Brassica oleracea release] AM391942 Extensin [Brassica napus (Rape)]			209	SPPPPVKSPPPPYYYH	16	12.75	0	203
1	Brassicaceae	Arabidopsis	thaliana	TC	EG433699 2 [Arabidopsis thaliana 14] EG433699 similar to UniRef100_Q40793 Cluster: Tyrosine-rich hydroxyproline-rich glycoprotein; n=1; Petroselinum crispum|Rep: Tyrosine-rich hydroxyproline-rich glycoprotein - Petroselinum crispum (Parsley) (Petroselinum hortense), partial (56%)	AT2G43150	EXT21	253	PPPPYYYSSPPPPVKS	16	5.94	75	169
1	Solanaceae	Capsicum	annuum	TC	GD112547 1 [Capsicum annuum 4] GD112547 similar to UniRef100_Q09082 Cluster: Extensin; n=1; Solanum lycopersicum|Rep: Extensin - Solanum lycopersicum (Tomato) (Lycopersicon esculentum), partial (17%)			220	PPPPYYYSSPPPPVKS	16	3.88	3	64
1	Solanaceae	Nicotiana	sylvestris	TA	BP744507 2 [Nicotiana sylvestris release] BP744507 Tyrosine-rich hydroxyproline-rich glycoprotein [Petroselinum crispum (Parsley) (Petroselinum hortense)]			100	PPPPYYYSSPPPPVKS	16	2.56	0	40
1	Brassicaceae	Brassica	napus	TC	TC65850 2 [Brassica napus 3-1] TC65850 similar to UniRef100_Q9FS16 Cluster: Extensin-3 precursor; n=1; Arabidopsis thaliana|Rep: Extensin-3 precursor - Arabidopsis thaliana (Mouse-ear cress), partial (41%)			242	PPPYVYHSPPPPVKSP	16	6.81	0	109
1	Brassicaceae	Brassica	napus	TC	TC84610 2 [Brassica napus 3-1] TC84610 similar to UniRef100_Q9FS16 Cluster: Extensin-3 precursor; n=1; Arabidopsis thaliana|Rep: Extensin-3 precursor - Arabidopsis thaliana (Mouse-ear cress), partial (25%)			215	PPPYVYHSPPPPVKSP	16	4.25	0	68
1	Brassicaceae	Brassica	oleracea	TA	AM391405 1 [Brassica oleracea release] AM391405 Extensin [Brassica napus (Rape)]			174	PPPYVYHSPPPPVKSP	16	7.94	47	173
1	Rosaceae	Malus	domestica	TC	CN917647 1 [Malus domestica x] CN917647 similar to UniRef100_Q43682 Cluster: Extensin-like protein; n=1; Vigna unguiculata|Rep: Extensin-like protein - Vigna unguiculata (Cowpea), partial (49%)			168	PPPYIYKSPPPPSPSP	16	7.5	0	119
1	Solanaceae	Solanum	lycopersicum	TC	TC215561 2 [Solanum lycopersicum 12] TC215561 similar to UniRef100_Q09082 Cluster: Extensin; n=1; Solanum lycopersicum|Rep: Extensin - Solanum lycopersicum (Tomato) (Lycopersicon esculentum), partial (25%)			231	PPPYIYKSPPPPSPSP	16	3.81	0	61
1	Orobanchaceae	Triphysaria	pusilla	TC	TC13563 1 [Triphysaria pusilla NoSp] TC13563 homologue to UniRef100_Q43682 Cluster: Extensin-like protein; n=1; Vigna unguiculata|Rep: Extensin-like protein - Vigna unguiculata (Cowpea), partial (45%)			128	PPPYIYKSPPPPSPSP	16	7.94	0	126
1	Orobanchaceae	Triphysaria	pusilla	TC	TC16149 1 [Triphysaria pusilla NoSp] TC16149 homologue to UniRef100_Q39866 Cluster: Hydroxyproline-rich glycoprotein; n=1; Glycine max|Rep: Hydroxyproline-rich glycoprotein - Glycine max (Soybean), partial (53%)			84	PPPYIYKSPPPPSPSP	16	3.62	5	62
1	Orobanchaceae	Triphysaria	versicolor	TC	TC6611 1 [Triphysaria versicolor 2] TC6611 homologue to UniRef100_Q43682 Cluster: Extensin-like protein; n=1; Vigna unguiculata|Rep: Extensin-like protein - Vigna unguiculata (Cowpea), partial (45%)			128	PPPYIYKSPPPPSPSP	16	7.94	0	126
1	Orobanchaceae	Triphysaria	versicolor	TC	TC8559 1 [Triphysaria versicolor 2] TC8559 homologue to UniRef100_Q39866 Cluster: Hydroxyproline-rich glycoprotein; n=1; Glycine max|Rep: Hydroxyproline-rich glycoprotein - Glycine max (Soybean), partial (53%)			84	PPPYIYKSPPPPSPSP	16	3.62	5	62
1	Orobanchaceae	Triphysaria	versicolor	TC	DR170050 2 [Triphysaria versicolor 2] DR170050 similar to UniRef100_Q43682 Cluster: Extensin-like protein; n=1; Vigna unguiculata|Rep: Extensin-like protein - Vigna unguiculata (Cowpea), partial (32%)			96	PPPYIYKSPPPPSPSP	16	3.94	31	95
1	Pteridaceae	Adiantum	capillus-veneris	TA	AB008227 3 [Adiantum capillus-veneris release] AB008227 Extensin precusor [Arabidopsis thaliana (Mouse-ear cress)]			295	PPPYIYKSPPPPSPSP	16	7.69	75	198
1	Myrsinaceae	Cyclamen	persicum	TA	AJ886482 2 [Cyclamen persicum release] AJ886482			195	PPPYIYKSPPPPSPSP	16	2.75	24	67
1	Fabaceae	Medicago	truncatula	TC	TC134810 1 [Medicago truncatula 9] TC134810 similar to UniRef100_Q43687 Cluster: Extensin-like protein; n=1; Vigna unguiculata|Rep: Extensin-like protein - Vigna unguiculata (Cowpea), partial (49%)			159	PPPYEYKSPPPPSPSP	16	2.56	118	158
1	Malvaceae	Theobroma	cacao	TC	TC12253 3 [Theobroma cacao 3] TC12253 similar to UniRef100_Q41707 Cluster: Extensin class 1 protein precursor; n=2; Vigna unguiculata|Rep: Extensin class 1 protein precursor - Vigna unguiculata (Cowpea), partial (31%)			235	PPPYEYKSPPPPSPSP	16	3.56	81	137
1	Fabaceae	Trifolium	pratense	TA	BB931536 1 [Trifolium pratense release] BB931536 Extensin precusor [Arabidopsis thaliana (Mouse-ear cress)]			152	PPPYEYKSPPPPSPSP	16	3.38	53	107
1	Fabaceae	Phaseolus	coccineus	TC	TC7081 1 [Phaseolus coccineus 1] TC7081 similar to UniRef100_Q40768 Cluster: Extensin precursor; n=1; Prunus dulcis|Rep: Extensin precursor - Prunus dulcis (Almond) (Prunus amygdalus), partial (27%)			83	PKPYYYHSPPPPSPPP	16	3.5	27	82
1	Fabaceae	Phaseolus	vulgaris	TC	FE899585 2 [Phaseolus vulgaris 3] FE899585 similar to UniRef100_Q09083 Cluster: Hydroxyproline-rich glycoprotein precursor; n=1; Phaseolus vulgaris|Rep: Hydroxyproline-rich glycoprotein precursor - Phaseolus vulgaris (Kidney bean) (French bean), partial (31%)			244	PKPYYYHSPPPPSPPP	16	9.88	36	194
1	Fabaceae	Phaseolus	vulgaris	TC	CV537755 1 [Phaseolus vulgaris 3] CV537755 similar to UniRef100_Q09083 Cluster: Hydroxyproline-rich glycoprotein precursor; n=1; Phaseolus vulgaris|Rep: Hydroxyproline-rich glycoprotein precursor - Phaseolus vulgaris (Kidney bean) (French bean), partial (36%)			246	PKPYYYHSPPPPSPPP	16	11.94	40	232
1	Fabaceae	Glycine	max	TC	TC343158 1 [Glycine max 14] TC343158 homologue to UniRef100_Q39835 Cluster: Extensin; n=1; Glycine max|Rep: Extensin - Glycine max (Soybean), partial (21%)			143	SPPPPKHSPPPPYIYA	16	3.56	30	87
1	Fabaceae	Trifolium	pratense	TA	BB904320 2 [Trifolium pratense release] BB904320 Extensin [Brassica napus (Rape)]			193	PPKPYHYSSPPPPVYS	16	4.38	85	155
1	Alliaceae	Allium	cepa	TC	TC6267 1 [Allium cepa 2] TC6267 similar to UniRef100_Q41707 Cluster: Extensin class 1 protein precursor; n=2; Vigna unguiculata|Rep: Extensin class 1 protein precursor - Vigna unguiculata (Cowpea), partial (45%)			270	PPPYHYKSPPPPSPSP	16	14.62	0	233
1	Alliaceae	Allium	cepa	TC	TC7670 3 [Allium cepa 2] TC7670 homologue to UniRef100_Q41707 Cluster: Extensin class 1 protein precursor; n=2; Vigna unguiculata|Rep: Extensin class 1 protein precursor - Vigna unguiculata (Cowpea), partial (72%)			448	PPPYHYKSPPPPSPSP	16	21.94	61	411
1	Fabaceae	Glycine	max	TC	TC310355 1 [Glycine max 14] TC310355 homologue to UniRef100_Q39865 Cluster: Hydroxyproline-rich glycoprotein; n=1; Glycine max|Rep: Hydroxyproline-rich glycoprotein - Glycine max (Soybean), partial (59%)			277	PPPYHYKSPPPPSPSP	16	4.62	14	87
1	Fabaceae	Glycine	max	TC	BQ079935 2 [Glycine max 14] BQ079935 homologue to UniRef100_Q39865 Cluster: Hydroxyproline-rich glycoprotein; n=1; Glycine max|Rep: Hydroxyproline-rich glycoprotein - Glycine max (Soybean), partial (57%)			135	PPPYHYKSPPPPSPSP	16	3.25	18	69
1	Fabaceae	Medicago	truncatula	TC	TC129525 1 [Medicago truncatula 9] TC129525 similar to UniRef100_Q39865 Cluster: Hydroxyproline-rich glycoprotein; n=1; Glycine max|Rep: Hydroxyproline-rich glycoprotein - Glycine max (Soybean), partial (46%)			214	PPPYHYKSPPPPSPSP	16	4.19	0	66
1	Pinaceae	Picea	glauca	TC	TC52674 3 [Picea glauca NoSp] TC52674 similar to UniRef100_Q43682 Cluster: Extensin-like protein; n=1; Vigna unguiculata|Rep: Extensin-like protein - Vigna unguiculata (Cowpea), partial (69%)			288	PPPYHYKSPPPPSPSP	16	9.38	32	187
1	Pinaceae	Picea	glauca	TC	TC63367 2 [Picea glauca NoSp] TC63367 similar to UniRef100_Q41707 Cluster: Extensin class 1 protein precursor; n=2; Vigna unguiculata|Rep: Extensin class 1 protein precursor - Vigna unguiculata (Cowpea), partial (35%)			293	PPPYHYKSPPPPSPSP	16	10.94	13	189
1	Pinaceae	Picea	glauca	TC	TC72403 3 [Picea glauca NoSp] TC72403 homologue to UniRef100_Q01943 Cluster: Extensin; n=1; Solanum lycopersicum|Rep: Extensin - Solanum lycopersicum (Tomato) (Lycopersicon esculentum), partial (44%)			190	PPPYHYKSPPPPSPSP	16	5	0	79
1	Pinaceae	Picea	glauca	TC	TC74263 2 [Picea glauca NoSp] TC74263 similar to UniRef100_Q8H9E1 Cluster: Extensin; n=1; Solanum tuberosum|Rep: Extensin - Solanum tuberosum (Potato), partial (53%)			183	PPPYHYKSPPPPSPSP	16	4.62	8	81
1	Pinaceae	Picea	glauca	TC	TC76547 2 [Picea glauca NoSp] TC76547 similar to UniRef100_Q41707 Cluster: Extensin class 1 protein precursor; n=2; Vigna unguiculata|Rep: Extensin class 1 protein precursor - Vigna unguiculata (Cowpea), partial (23%)			222	PPPYHYKSPPPPSPSP	16	6.81	3	111
1	Pinaceae	Picea	glauca	TC	TC77783 1 [Picea glauca NoSp] TC77783 similar to UniRef100_Q41707 Cluster: Extensin class 1 protein precursor; n=2; Vigna unguiculata|Rep: Extensin class 1 protein precursor - Vigna unguiculata (Cowpea), partial (49%)			423	PPPYHYKSPPPPSPSP	16	15.81	30	283
1	Pinaceae	Picea	glauca	TC	TC78820 1 [Picea glauca NoSp] TC78820 similar to UniRef100_Q09085 Cluster: Hydroxyproline-rich glycoprotein; n=1; Phaseolus vulgaris|Rep: Hydroxyproline-rich glycoprotein - Phaseolus vulgaris (Kidney bean) (French bean), partial (43%)			303	PPPYHYKSPPPPSPSP	16	10.31	0	165
1	Pinaceae	Picea	glauca	TC	TC70670 1 [Picea glauca NoSp] TC70670 similar to UniRef100_O65760 Cluster: Extensin; n=1; Cicer arietinum|Rep: Extensin - Cicer arietinum (Chickpea) (Garbanzo), partial (58%)			236	PPPYHYKSPPPPSPSP	16	5.56	22	110
1	Pinaceae	Picea	glauca	TC	TC83439 2 [Picea glauca NoSp] TC83439 similar to UniRef100_Q41707 Cluster: Extensin class 1 protein precursor; n=2; Vigna unguiculata|Rep: Extensin class 1 protein precursor - Vigna unguiculata (Cowpea), partial (49%)			383	PPPYHYKSPPPPSPSP	16	12.19	33	227
1	Pinaceae	Picea	glauca	TC	TC83439 3 [Picea glauca NoSp] TC83439 similar to UniRef100_Q41707 Cluster: Extensin class 1 protein precursor; n=2; Vigna unguiculata|Rep: Extensin class 1 protein precursor - Vigna unguiculata (Cowpea), partial (49%)			383	PPPYHYKSPPPPSPSP	16	3.81	228	289
1	Pinaceae	Picea	glauca	TC	TC83762 1 [Picea glauca NoSp] TC83762 similar to UniRef100_Q41707 Cluster: Extensin class 1 protein precursor; n=2; Vigna unguiculata|Rep: Extensin class 1 protein precursor - Vigna unguiculata (Cowpea), partial (26%)			155	PPPYHYKSPPPPSPSP	16	7.75	29	154
1	Pinaceae	Picea	glauca	TC	DV984812 1 [Picea glauca NoSp] DV984812 similar to UniRef100_Q09085 Cluster: Hydroxyproline-rich glycoprotein; n=1; Phaseolus vulgaris|Rep: Hydroxyproline-rich glycoprotein - Phaseolus vulgaris (Kidney bean) (French bean), partial (57%)			147	PPPYHYKSPPPPSPSP	16	8.69	0	138
1	Pinaceae	Pinus	taeda	TC	TC98327 3 [Pinus taeda NoSp] TC98327 homologue to UniRef100_Q41707 Cluster: Extensin class 1 protein precursor; n=2; Vigna unguiculata|Rep: Extensin class 1 protein precursor - Vigna unguiculata (Cowpea), partial (37%)			203	PPPYHYKSPPPPSPSP	16	11.12	25	202
1	Pinaceae	Pinus	taeda	TC	TC100937 2 [Pinus taeda NoSp] TC100937 homologue to UniRef100_Q41707 Cluster: Extensin class 1 protein precursor; n=2; Vigna unguiculata|Rep: Extensin class 1 protein precursor - Vigna unguiculata (Cowpea), partial (39%)			216	PPPYHYKSPPPPSPSP	16	11.81	27	215
1	Pinaceae	Pinus	taeda	TC	TC102928 3 [Pinus taeda NoSp] TC102928 similar to UniRef100_Q41707 Cluster: Extensin class 1 protein precursor; n=2; Vigna unguiculata|Rep: Extensin class 1 protein precursor - Vigna unguiculata (Cowpea), partial (43%)			238	PPPYHYKSPPPPSPSP	16	12.56	33	235
1	Pinaceae	Pinus	taeda	TC	TC106825 1 [Pinus taeda NoSp] TC106825 similar to UniRef100_Q41707 Cluster: Extensin class 1 protein precursor; n=2; Vigna unguiculata|Rep: Extensin class 1 protein precursor - Vigna unguiculata (Cowpea), partial (44%)			318	PPPYHYKSPPPPSPSP	16	13.5	20	235
1	Pinaceae	Pinus	taeda	TC	TC110590 3 [Pinus taeda NoSp] TC110590 homologue to emb|AJ271027.1|SGI271027 Sequoiadendron giganteum partial 25S rRNA gene, partial (29%)			420	PPPYHYKSPPPPSPSP	16	3.44	310	364
1	Pinaceae	Pinus	taeda	TC	TC110735 1 [Pinus taeda NoSp] TC110735 similar to UniRef100_Q41707 Cluster: Extensin class 1 protein precursor; n=2; Vigna unguiculata|Rep: Extensin class 1 protein precursor - Vigna unguiculata (Cowpea), partial (43%)			235	PPPYHYKSPPPPSPSP	16	12.88	24	234
1	Pinaceae	Pinus	taeda	TC	CO162971 3 [Pinus taeda NoSp] CO162971 similar to UniRef100_Q41707 Cluster: Extensin class 1 protein precursor; n=2; Vigna unguiculata|Rep: Extensin class 1 protein precursor - Vigna unguiculata (Cowpea), partial (36%)			213	PPPYHYKSPPPPSPSP	16	10.88	37	212
1	Pinaceae	Pinus	taeda	TC	DR059304 2 [Pinus taeda NoSp] DR059304 homologue to UniRef100_Q43682 Cluster: Extensin-like protein; n=1; Vigna unguiculata|Rep: Extensin-like protein - Vigna unguiculata (Cowpea), partial (64%)			180	PPPYHYKSPPPPSPSP	16	11.19	0	179
1	Pinaceae	Pinus	taeda	TC	CO167396 1 [Pinus taeda NoSp] CO167396 similar to UniRef100_Q41707 Cluster: Extensin class 1 protein precursor; n=2; Vigna unguiculata|Rep: Extensin class 1 protein precursor - Vigna unguiculata (Cowpea), partial (31%)			181	PPPYHYKSPPPPSPSP	16	9.19	34	180
1	Pinaceae	Picea	abies	TA	TA581_3329 2 [Picea abies release] TA581_3329 Extensin precusor [Arabidopsis thaliana (Mouse-ear cress)]			235	PPPYHYKSPPPPSPSP	16	8.19	0	130
1	Pinaceae	Picea	abies	TA	AM168592 1 [Picea abies release] AM168592			155	PPPYHYKSPPPPSPSP	16	7.75	29	154
1	Pinaceae	Pinus	pinaster	TA	TA3605_71647 3 [Pinus pinaster release] TA3605_71647 Extensin precusor [Arabidopsis thaliana (Mouse-ear cress)]			238	PPPYHYKSPPPPSPSP	16	12.56	33	235
1	Pinaceae	Pinus	pinaster	TA	TA4878_71647 2 [Pinus pinaster release] TA4878_71647 Extensin precusor [Arabidopsis thaliana (Mouse-ear cress)]			100	PPPYHYKSPPPPSPSP	16	4.25	32	99
1	Pinaceae	Pinus	pinaster	TA	AL750953 3 [Pinus pinaster release] AL750953			112	PPPYHYKSPPPPSPSP	16	5.31	27	111
1	Pinaceae	Pinus	pinaster	TA	AL751014 3 [Pinus pinaster release] AL751014			148	PPPYHYKSPPPPSPSP	16	6.62	0	106
1	Pinaceae	Pinus	pinaster	TA	AL751047 1 [Pinus pinaster release] AL751047 Extensin precusor [Arabidopsis thaliana (Mouse-ear cress)]			116	PPPYHYKSPPPPSPSP	16	7.25	0	115
1	Rosaceae	Prunus	cerasus	TA	EE488515 2 [Prunus cerasus release] EE488515 Extensin precusor [Arabidopsis thaliana (Mouse-ear cress)]			132	PPPYHYKSPPPPSPSP	16	7.69	1	124
1	Fabaceae	Trifolium	pratense	TA	BB931461 3 [Trifolium pratense release] BB931461			150	PPPYHYKSPPPPSPSP	16	4.69	73	147
1	Fabaceae	Glycine	max	TC	TC290127 1 [Glycine max 14] TC290127 homologue to UniRef100_Q43682 Cluster: Extensin-like protein; n=1; Vigna unguiculata|Rep: Extensin-like protein - Vigna unguiculata (Cowpea), partial (48%)			229	PPPYVYKSPPPPSPSP	16	8.38	2	135
1	Fabaceae	Glycine	max	TC	TC292128 1 [Glycine max 14] TC292128 homologue to UniRef100_Q41707 Cluster: Extensin class 1 protein precursor; n=2; Vigna unguiculata|Rep: Extensin class 1 protein precursor - Vigna unguiculata (Cowpea), partial (20%)			172	PPPYVYKSPPPPSPSP	16	5.19	1	83
1	Fabaceae	Glycine	max	TC	TC297776 3 [Glycine max 14] TC297776 homologue to UniRef100_Q41707 Cluster: Extensin class 1 protein precursor; n=2; Vigna unguiculata|Rep: Extensin class 1 protein precursor - Vigna unguiculata (Cowpea), partial (41%)			271	PPPYVYKSPPPPSPSP	16	11.62	0	187
1	Fabaceae	Glycine	max	TC	TC304404 1 [Glycine max 14] TC304404 hydroxyproline-rich glycoprotein			199	PPPYVYKSPPPPSPSP	16	7.94	0	126
1	Fabaceae	Glycine	max	TC	TC297776 3 [Glycine max 14] TC297776 homologue to UniRef100_Q41707 Cluster: Extensin class 1 protein precursor; n=2; Vigna unguiculata|Rep: Extensin class 1 protein precursor - Vigna unguiculata (Cowpea), partial (41%)			271	PPPYVYKSPPPPSPSP	16	10.44	23	189
1	Fabaceae	Glycine	max	TC	BI971744 1 [Glycine max 14] BI971744 homologue to UniRef100_Q41707 Cluster: Extensin class 1 protein precursor; n=2; Vigna unguiculata|Rep: Extensin class 1 protein precursor - Vigna unguiculata (Cowpea), partial (15%)			145	PPPYVYKSPPPPSPSP	16	4	0	63
1	Fabaceae	Glycine	max	TC	FG998905 1 [Glycine max 14] FG998905 similar to UniRef100_Q41707 Cluster: Extensin class 1 protein precursor; n=2; Vigna unguiculata|Rep: Extensin class 1 protein precursor - Vigna unguiculata (Cowpea), partial (26%)			209	PPPYVYKSPPPPSPSP	16	4.25	78	147
1	Malvaceae	Gossypium	hirsutum	TC	ES813279 2 [Gossypium hirsutum NoSp] ES813279 similar to UniRef100_Q43682 Cluster: Extensin-like protein; n=1; Vigna unguiculata|Rep: Extensin-like protein - Vigna unguiculata (Cowpea), partial (43%)			255	PPPYVYKSPPPPSPSP	16	2.88	52	97
1	Asteraceae	Lactuca	sativa	TC	DW135161 2 [Lactuca sativa 3] DW135161 homologue to UniRef100_Q43682 Cluster: Extensin-like protein; n=1; Vigna unguiculata|Rep: Extensin-like protein - Vigna unguiculata (Cowpea), partial (68%)			267	PPPYVYKSPPPPSPSP	16	10.44	100	266
1	Fabaceae	Lotus	japonicus	TC	TC42159 3 [Lotus japonicus 5] TC42159 similar to UniRef100_Q41707 Cluster: Extensin class 1 protein precursor; n=2; Vigna unguiculata|Rep: Extensin class 1 protein precursor - Vigna unguiculata (Cowpea), partial (26%)			216	PPPYVYKSPPPPSPSP	16	7.75	78	201
1	Fabaceae	Lotus	japonicus	TC	TC44996 2 [Lotus japonicus 5] TC44996 similar to UniRef100_Q01945 Cluster: Extensin; n=1; Solanum lycopersicum|Rep: Extensin - Solanum lycopersicum (Tomato) (Lycopersicon esculentum), partial (87%)			157	PPPYVYKSPPPPSPSP	16	4	0	63
1	Fabaceae	Medicago	truncatula	TC	TC135122 3 [Medicago truncatula 9] TC135122 similar to UniRef100_Q41707 Cluster: Extensin class 1 protein precursor; n=2; Vigna unguiculata|Rep: Extensin class 1 protein precursor - Vigna unguiculata (Cowpea), partial (35%)			198	PPPYVYKSPPPPSPSP	16	5.62	108	197
1	Fabaceae	Medicago	truncatula	TC	TC138188 2 [Medicago truncatula 9] TC138188 homologue to UniRef100_Q43682 Cluster: Extensin-like protein; n=1; Vigna unguiculata|Rep: Extensin-like protein - Vigna unguiculata (Cowpea), partial (81%)			312	PPPYVYKSPPPPSPSP	16	14.88	0	237
1	Rosaceae	Prunus	persica	TC	AJ533927 1 [Prunus persica 2] AJ533927 similar to UniRef100_Q09085 Cluster: Hydroxyproline-rich glycoprotein; n=1; Phaseolus vulgaris|Rep: Hydroxyproline-rich glycoprotein - Phaseolus vulgaris (Kidney bean) (French bean), partial (28%)			121	PPPYVYKSPPPPSPSP	16	2.88	55	100
1	Solanaceae	Solanum	lycopersicum	TC	TC216853 1 [Solanum lycopersicum 12] TC216853 extensin (class I)			167	PPPYVYKSPPPPSPSP	16	6.38	62	163
1	Orobanchaceae	Triphysaria	pusilla	TC	TC7449 2 [Triphysaria pusilla NoSp] TC7449 homologue to UniRef100_Q43682 Cluster: Extensin-like protein; n=1; Vigna unguiculata|Rep: Extensin-like protein - Vigna unguiculata (Cowpea), partial (57%)			244	PPPYVYKSPPPPSPSP	16	9.19	48	195
1	Orobanchaceae	Triphysaria	pusilla	TC	TC12416 2 [Triphysaria pusilla NoSp] TC12416 homologue to UniRef100_Q43682 Cluster: Extensin-like protein; n=1; Vigna unguiculata|Rep: Extensin-like protein - Vigna unguiculata (Cowpea), partial (32%)			166	PPPYVYKSPPPPSPSP	16	5.56	0	88
1	Orobanchaceae	Triphysaria	pusilla	TC	DR170050 2 [Triphysaria pusilla NoSp] DR170050 similar to UniRef100_Q43682 Cluster: Extensin-like protein; n=1; Vigna unguiculata|Rep: Extensin-like protein - Vigna unguiculata (Cowpea), partial (30%)			91	PPPYVYKSPPPPSPSP	16	3.38	31	84
1	Orobanchaceae	Triphysaria	versicolor	TC	TC3014 2 [Triphysaria versicolor 2] TC3014 homologue to UniRef100_Q43682 Cluster: Extensin-like protein; n=1; Vigna unguiculata|Rep: Extensin-like protein - Vigna unguiculata (Cowpea), partial (57%)			244	PPPYVYKSPPPPSPSP	16	9.19	48	195
1	Rosaceae	Fragaria	vesca	TA	TA3116_57918 1 [Fragaria vesca release] TA3116_57918 Extensin precusor [Arabidopsis thaliana (Mouse-ear cress)]			226	PPPYVYKSPPPPSPSP	16	10	63	225
1	Fabaceae	Lotus	corniculatus	TA	BP083338 2 [Lotus corniculatus release] BP083338 Extensin related cluster			157	PPPYVYKSPPPPSPSP	16	4	0	63
1	Fabaceae	Trifolium	pratense	TA	TA193_57577 2 [Trifolium pratense release] TA193_57577 Extensin precusor [Arabidopsis thaliana (Mouse-ear cress)]			249	PPPYVYKSPPPPSPSP	16	3	88	135
1	Fabaceae	Trifolium	pratense	TA	BB928964 2 [Trifolium pratense release] BB928964 Extensin precusor [Arabidopsis thaliana (Mouse-ear cress)]			194	PPPYVYKSPPPPSPSP	16	3	143	190
1	Fabaceae	Trifolium	pratense	TA	BB929581 3 [Trifolium pratense release] BB929581 Extensin precusor [Arabidopsis thaliana (Mouse-ear cress)]			216	PPPYVYKSPPPPSPSP	16	3	70	117
1	Fabaceae	Trifolium	pratense	TA	BB937122 3 [Trifolium pratense release] BB937122 Extensin precusor [Arabidopsis thaliana (Mouse-ear cress)]			120	PPPYVYKSPPPPSPSP	16	4	55	119
1	Asteraceae	Carthamus	tinctorius	TA	EL510452 3 [Carthamus tinctorius release] EL510452			269	PPPYVYKSPPPPSPSP	16	10.81	83	255
1	Fabaceae	Vigna	unguiculata	NR	gi|791146|emb|CAA60020.1| extensin-like protein [Vigna unguiculata]			280	PPPYVYKSPPPPSPSP	16	17.44	0	278
1	Fabaceae	Lupinus	angustifolius	NR	gi|28912428|gb|AAO53312.1| serine-proline rich repeat protein [Lupinus angustifolius]			195	PPPYVYKSPPPPSPSP	16	8.12	45	180
1	Fabaceae	Lupinus	angustifolius	NR	gi|49182258|gb|AAT57631.1| serine/proline-rich repeat protein [Lupinus angustifolius]			198	PPPYVYKSPPPPSPSP	16	8.12	48	183
1	Brassicaceae	Arabidopsis	thaliana	TC	AV553637 1 [Arabidopsis thaliana 14] AV553637 UniRef100_Q9FS16 Cluster: Extensin-3 precursor; n=1; Arabidopsis thaliana|Rep: Extensin-3 precursor - Arabidopsis thaliana (Mouse-ear cress), partial (24%)	AT1G21310	EXT3,EXT5	106	SPPPVYHSPPPPKKHY	16	3.62	33	90
1	Brassicaceae	Arabidopsis	thaliana	TC	AV550469 1 [Arabidopsis thaliana 14] AV550469 UniRef100_Q9FS16 Cluster: Extensin-3 precursor; n=1; Arabidopsis thaliana|Rep: Extensin-3 precursor - Arabidopsis thaliana (Mouse-ear cress), partial (28%)			121	SPPPVYHSPPPPKKHY	16	5.69	0	90
1	Brassicaceae	Arabidopsis	thaliana	TC	AV536668 1 [Arabidopsis thaliana 14] AV536668 UniRef100_Q9FS16 Cluster: Extensin-3 precursor; n=1; Arabidopsis thaliana|Rep: Extensin-3 precursor - Arabidopsis thaliana (Mouse-ear cress), partial (18%)	AT1G20190	EXPANSIN 11 domain (fragment, putative extensin fusion)	147	SPPPVYHSPPPPKKHY	16	3.81	70	130
1	Brassicaceae	Arabidopsis	thaliana	TC	AV549526 3 [Arabidopsis thaliana 14] AV549526 UniRef100_Q9FS16 Cluster: Extensin-3 precursor; n=1; Arabidopsis thaliana|Rep: Extensin-3 precursor - Arabidopsis thaliana (Mouse-ear cress), partial (30%)			130	SPPPVYHSPPPPKKHY	16	6.06	0	96
1	Brassicaceae	Arabidopsis	thaliana	TC	BE523068 2 [Arabidopsis thaliana 14] BE523068 UniRef100_Q9FS16 Cluster: Extensin-3 precursor; n=1; Arabidopsis thaliana|Rep: Extensin-3 precursor - Arabidopsis thaliana (Mouse-ear cress), partial (24%)	AT1G21310	EXT3,EXT5	108	SPPPVYHSPPPPKKHY	16	3.62	35	92
1	Brassicaceae	Arabidopsis	thaliana	TC	EG513498 3 [Arabidopsis thaliana 14] EG513498 homologue to UniRef100_Q9FS16 Cluster: Extensin-3 precursor; n=1; Arabidopsis thaliana|Rep: Extensin-3 precursor - Arabidopsis thaliana (Mouse-ear cress), partial (28%)			130	SPPPVYHSPPPPKKHY	16	7.5	5	124
1	Brassicaceae	Arabidopsis	thaliana	TC	EG482643 3 [Arabidopsis thaliana 14] EG482643 homologue to UniRef100_Q9FS16 Cluster: Extensin-3 precursor; n=1; Arabidopsis thaliana|Rep: Extensin-3 precursor - Arabidopsis thaliana (Mouse-ear cress), partial (39%)			249	SPPPVYHSPPPPKKHY	16	3.75	49	108
1	Brassicaceae	Brassica	napus	TC	TC69341 2 [Brassica napus 3-1] TC69341 homologue to UniRef100_Q9FS16 Cluster: Extensin-3 precursor; n=1; Arabidopsis thaliana|Rep: Extensin-3 precursor - Arabidopsis thaliana (Mouse-ear cress), partial (74%)			435	SPPPVYHSPPPPKKHY	16	2	91	124
1	Brassicaceae	Brassica	napus	TC	TC69341 2 [Brassica napus 3-1] TC69341 homologue to UniRef100_Q9FS16 Cluster: Extensin-3 precursor; n=1; Arabidopsis thaliana|Rep: Extensin-3 precursor - Arabidopsis thaliana (Mouse-ear cress), partial (74%)			435	SPPPVYHSPPPPKKHY	16	3.75	0	59
1	Brassicaceae	Brassica	napus	TC	TC86080 1 [Brassica napus 3-1] TC86080 homologue to UniRef100_Q9FS16 Cluster: Extensin-3 precursor; n=1; Arabidopsis thaliana|Rep: Extensin-3 precursor - Arabidopsis thaliana (Mouse-ear cress), partial (40%)			196	SPPPVYHSPPPPKKHY	16	2	136	169
1	Brassicaceae	Thlaspi	caerulescens	TA	DN923752 1 [Thlaspi caerulescens release] DN923752 Extensin [Brassica napus (Rape)]			135	SPPPVYHSPPPPKKHY	16	2	12	45
1	Brassicaceae	Brassica	oleracea	TA	AM057837 2 [Brassica oleracea release] AM057837 Extensin [Brassica napus (Rape)]			220	SPPPVYHSPPPPKKHY	16	2	17	50
1	Brassicaceae	Brassica	oleracea	TA	AM057986 1 [Brassica oleracea release] AM057986 Extensin [Brassica napus (Rape)]			198	SPPPVYHSPPPPKKHY	16	2	78	111
1	Brassicaceae	Brassica	oleracea	TA	AM060511 1 [Brassica oleracea release] AM060511 Extensin precusor [Arabidopsis thaliana (Mouse-ear cress)]			207	SPPPVYHSPPPPKKHY	16	2	39	72
1	Brassicaceae	Brassica	oleracea	TA	AM061231 2 [Brassica oleracea release] AM061231 Extensin [Brassica napus (Rape)]			244	SPPPVYHSPPPPKKHY	16	2	36	69
1	Brassicaceae	Brassica	rapa	TA	BG544547 3 [Brassica rapa release] BG544547 Extensin [Brassica napus (Rape)]			146	SPPPVYHSPPPPKKHY	16	3.31	53	105
1	Fabaceae	Lotus	japonicus	TC	BW594926 3 [Lotus japonicus 5] BW594926 similar to UniRef100_Q43687 Cluster: Extensin-like protein; n=1; Vigna unguiculata|Rep: Extensin-like protein - Vigna unguiculata (Cowpea), partial (52%)			161	PPPPYIYASPPPPSPS	16	5.19	63	146
1	Fabaceae	Glycine	max	TC	TC285428 3 [Glycine max 14] TC285428 homologue to UniRef100_Q39835 Cluster: Extensin; n=1; Glycine max|Rep: Extensin - Glycine max (Soybean), partial (69%)			319	SPPPPKHSPPPPYYYH	16	12.31	42	238
1	Fabaceae	Glycine	max	TC	TC291657 1 [Glycine max 14] TC291657 similar to UniRef100_A7NV49 Cluster: Chromosome chr18 scaffold_1, whole genome shotgun sequence; n=1; Vitis vinifera|Rep: Chromosome chr18 scaffold_1, whole genome shotgun sequence - Vitis vinifera (Grape), partial (31%)			216	SPPPPKHSPPPPYYYH	16	2.38	36	73
1	Fabaceae	Glycine	max	TC	TC283611 1 [Glycine max 14] TC283611 UniRef100_Q39835 Cluster: Extensin; n=1; Glycine max|Rep: Extensin - Glycine max (Soybean), complete			541	SPPPPKHSPPPPYYYH	16	11.31	33	213
1	Fabaceae	Glycine	max	TC	TC285428 3 [Glycine max 14] TC285428 homologue to UniRef100_Q39835 Cluster: Extensin; n=1; Glycine max|Rep: Extensin - Glycine max (Soybean), partial (69%)			319	SPPPPKHSPPPPYYYH	16	11.75	42	229
1	Fabaceae	Glycine	max	TC	TC327175 2 [Glycine max 14] TC327175 homologue to UniRef100_Q39835 Cluster: Extensin; n=1; Glycine max|Rep: Extensin - Glycine max (Soybean), partial (34%)			175	SPPPPKHSPPPPYYYH	16	2.31	0	36
1	Fabaceae	Glycine	max	TC	TC327171 1 [Glycine max 14] TC327171 homologue to UniRef100_Q39835 Cluster: Extensin; n=1; Glycine max|Rep: Extensin - Glycine max (Soybean), partial (39%)			182	SPPPPKHSPPPPYYYH	16	3.31	41	93
1	Fabaceae	Glycine	max	TC	TC334393 2 [Glycine max 14] TC334393 homologue to UniRef100_Q39835 Cluster: Extensin; n=1; Glycine max|Rep: Extensin - Glycine max (Soybean), partial (34%)			222	SPPPPKHSPPPPYYYH	16	2.31	33	69
1	Fabaceae	Glycine	max	TC	TC337690 1 [Glycine max 14] TC337690 UniRef100_Q39835 Cluster: Extensin; n=1; Glycine max|Rep: Extensin - Glycine max (Soybean), partial (27%)			142	SPPPPKHSPPPPYYYH	16	5.12	39	120
1	Fabaceae	Glycine	max	TC	TC344635 3 [Glycine max 14] TC344635 UniRef100_Q39835 Cluster: Extensin; n=1; Glycine max|Rep: Extensin - Glycine max (Soybean), partial (31%)			169	SPPPPKHSPPPPYYYH	16	3.88	30	91
1	Fabaceae	Glycine	max	TC	TC348297 1 [Glycine max 14] TC348297 homologue to UniRef100_Q39835 Cluster: Extensin; n=1; Glycine max|Rep: Extensin - Glycine max (Soybean), partial (35%)			307	SPPPPKHSPPPPYYYH	16	2.31	19	55
1	Fabaceae	Glycine	max	TC	TC348651 3 [Glycine max 14] TC348651 homologue to UniRef100_Q39835 Cluster: Extensin; n=1; Glycine max|Rep: Extensin - Glycine max (Soybean), partial (44%)			244	SPPPPKHSPPPPYYYH	16	6.31	42	144
1	Fabaceae	Glycine	max	TC	BQ785281 2 [Glycine max 14] BQ785281 homologue to UniRef100_Q39835 Cluster: Extensin; n=1; Glycine max|Rep: Extensin - Glycine max (Soybean), partial (22%)			141	SPPPPKHSPPPPYYYH	16	3.81	34	94
1	Fabaceae	Phaseolus	vulgaris	TC	TC19108 1 [Phaseolus vulgaris 3] TC19108 UniRef100_Q09083 Cluster: Hydroxyproline-rich glycoprotein precursor; n=1; Phaseolus vulgaris|Rep: Hydroxyproline-rich glycoprotein precursor - Phaseolus vulgaris (Kidney bean) (French bean), complete			581	SPPPPKHSPPPPYYYH	16	14.94	36	274
1	Brassicaceae	Arabidopsis	thaliana	TC	TC315088 1 [Arabidopsis thaliana 14] TC315088 UniRef100_Q38913 Cluster: Extensin-1 precursor; n=1; Arabidopsis thaliana|Rep: Extensin-1 precursor - Arabidopsis thaliana (Mouse-ear cress), partial (66%)	AT1G76930	EXT1,EXT4	371	SPPPVYKSPPPPVKHY	16	13.5	38	258
1	Brassicaceae	Arabidopsis	thaliana	TC	NP044388 1 [Arabidopsis thaliana 14] NP044388 GB|U43627.1|AAA85899.1 extensin	AT1G76930	EXT1,EXT4	285	SPPPVYKSPPPPVKHY	16	15.94	24	281
1	Brassicaceae	Arabidopsis	thaliana	TC	NP1663140 1 [Arabidopsis thaliana 14] NP1663140 GB|NM_179564.1|NP_849895.1 ATEXT4 (EXTENSIN 4);Identical to Extensin-1 precursor (AtExt1) (AtExt4) (EXT1) [Arabidopsis Thaliana] (GB:Q38913;GB:Q9FS15;GB:Q9SAW2); similar to ATEXT3 (EXTENSIN 3), structural constituent of cell wall [Arabidopsis thaliana] (TAIR:AT1G21310.1); similar t	AT1G76930	EXT1,EXT4	353	SPPPVYKSPPPPVKHY	16	8.31	38	170
1	Brassicaceae	Arabidopsis	thaliana	TC	AV553536 1 [Arabidopsis thaliana 14] AV553536 homologue to UniRef100_Q38913 Cluster: Extensin-1 precursor; n=1; Arabidopsis thaliana|Rep: Extensin-1 precursor - Arabidopsis thaliana (Mouse-ear cress), partial (37%)			150	SPPPVYKSPPPPVKHY	16	7.38	0	117
1	Brassicaceae	Arabidopsis	thaliana	TC	AV550174 1 [Arabidopsis thaliana 14] AV550174 homologue to UniRef100_Q304C4 Cluster: Uncharacterized protein At1g76930.2; n=1; Arabidopsis thaliana|Rep: Uncharacterized protein At1g76930.2 - Arabidopsis thaliana (Mouse-ear cress), partial (47%)	AT1G76930	EXT1,EXT4	125	SPPPVYKSPPPPVKHY	16	5.75	33	124
1	Brassicaceae	Arabidopsis	thaliana	TC	AV554071 1 [Arabidopsis thaliana 14] AV554071 homologue to UniRef100_Q304C4 Cluster: Uncharacterized protein At1g76930.2; n=1; Arabidopsis thaliana|Rep: Uncharacterized protein At1g76930.2 - Arabidopsis thaliana (Mouse-ear cress), partial (59%)	AT1G76930	EXT1,EXT4	154	SPPPVYKSPPPPVKHY	16	7.69	31	153
1	Brassicaceae	Arabidopsis	thaliana	TC	AV550174 1 [Arabidopsis thaliana 14] AV550174 homologue to UniRef100_Q304C4 Cluster: Uncharacterized protein At1g76930.2; n=1; Arabidopsis thaliana|Rep: Uncharacterized protein At1g76930.2 - Arabidopsis thaliana (Mouse-ear cress), partial (47%)	AT1G76930	EXT1,EXT4	125	SPPPVYKSPPPPVKHY	16	5.75	33	124
1	Brassicaceae	Arabidopsis	thaliana	TC	EG515673 3 [Arabidopsis thaliana 14] EG515673 UniRef100_Q304C4 Cluster: Uncharacterized protein At1g76930.2; n=1; Arabidopsis thaliana|Rep: Uncharacterized protein At1g76930.2 - Arabidopsis thaliana (Mouse-ear cress), partial (40%)	AT1G76930	EXT1,EXT4	117	SPPPVYKSPPPPVKHY	16	4.38	39	108
1	Brassicaceae	Arabidopsis	thaliana	TC	EG515683 3 [Arabidopsis thaliana 14] EG515683 UniRef100_Q304C4 Cluster: Uncharacterized protein At1g76930.2; n=1; Arabidopsis thaliana|Rep: Uncharacterized protein At1g76930.2 - Arabidopsis thaliana (Mouse-ear cress), partial (30%)	AT1G76930	EXT1,EXT4	93	SPPPVYKSPPPPVKHY	16	3.12	39	88
1	Brassicaceae	Arabidopsis	thaliana	TC	EG483379 2 [Arabidopsis thaliana 14] EG483379 UniRef100_Q38913 Cluster: Extensin-1 precursor; n=1; Arabidopsis thaliana|Rep: Extensin-1 precursor - Arabidopsis thaliana (Mouse-ear cress), partial (13%)			74	SPPPVYKSPPPPVKHY	16	2.94	22	68
1	Brassicaceae	Arabidopsis	thaliana	TC	EG483383 2 [Arabidopsis thaliana 14] EG483383 UniRef100_Q38913 Cluster: Extensin-1 precursor; n=1; Arabidopsis thaliana|Rep: Extensin-1 precursor - Arabidopsis thaliana (Mouse-ear cress), partial (13%)			64	SPPPVYKSPPPPVKHY	16	2.94	12	58
1	Brassicaceae	Arabidopsis	thaliana	TC	EH897302 2 [Arabidopsis thaliana 14] EH897302 UniRef100_Q304C4 Cluster: Uncharacterized protein At1g76930.2; n=1; Arabidopsis thaliana|Rep: Uncharacterized protein At1g76930.2 - Arabidopsis thaliana (Mouse-ear cress), partial (13%)			33	SPPPVYKSPPPPVKHY	16	2.06	0	32
1	Brassicaceae	Arabidopsis	thaliana	TC	EL032252 2 [Arabidopsis thaliana 14] EL032252 UniRef100_Q38913 Cluster: Extensin-1 precursor; n=1; Arabidopsis thaliana|Rep: Extensin-1 precursor - Arabidopsis thaliana (Mouse-ear cress), partial (9%)			38	SPPPVYKSPPPPVKHY	16	2	0	31
1	Brassicaceae	Arabidopsis	thaliana	TC	EL126074 3 [Arabidopsis thaliana 14] EL126074 UniRef100_Q304C4 Cluster: Uncharacterized protein At1g76930.2; n=1; Arabidopsis thaliana|Rep: Uncharacterized protein At1g76930.2 - Arabidopsis thaliana (Mouse-ear cress), partial (14%)			40	SPPPVYKSPPPPVKHY	16	2.31	0	36
1	Brassicaceae	Arabidopsis	thaliana	TC	EL167839 1 [Arabidopsis thaliana 14] EL167839 UniRef100_Q38913 Cluster: Extensin-1 precursor; n=1; Arabidopsis thaliana|Rep: Extensin-1 precursor - Arabidopsis thaliana (Mouse-ear cress), partial (10%)			42	SPPPVYKSPPPPVKHY	16	1.94	0	30
1	Brassicaceae	Brassica	napus	TC	TC107759 1 [Brassica napus 3-1] TC107759 similar to UniRef100_Q9FS16 Cluster: Extensin-3 precursor; n=1; Arabidopsis thaliana|Rep: Extensin-3 precursor - Arabidopsis thaliana (Mouse-ear cress), partial (51%)			324	SPPPVYKSPPPPVKHY	16	2.5	30	69
1	Brassicaceae	Brassica	oleracea	TA	TA1913_3712 2 [Brassica oleracea release] TA1913_3712 Extensin [Brassica napus (Rape)]			250	SPPPVYKSPPPPVKHY	16	5.56	34	126
1	Brassicaceae	Brassica	oleracea	TA	TA1915_3712 2 [Brassica oleracea release] TA1915_3712 Myosin heavy chain [Arabidopsis thaliana (Mouse-ear cress)]			320	SPPPVYKSPPPPVKHY	16	2.88	269	318
1	Alliaceae	Allium	cepa	TC	TC7664 3 [Allium cepa 2] TC7664 similar to UniRef100_Q43682 Cluster: Extensin-like protein; n=1; Vigna unguiculata|Rep: Extensin-like protein - Vigna unguiculata (Cowpea), partial (76%)			270	PPPYLYKSPPPPVKSP	16	11.19	57	235
1	Alliaceae	Allium	cepa	TC	CF440598 1 [Allium cepa 2] CF440598 similar to UniRef100_Q43682 Cluster: Extensin-like protein; n=1; Vigna unguiculata|Rep: Extensin-like protein - Vigna unguiculata (Cowpea), partial (86%)			202	PPPYLYKSPPPPVKSP	16	12.5	0	200
1	Asteraceae	Helianthus	annuus	TC	BU027514 2 [Helianthus annuus 6] BU027514 similar to UniRef100_Q9M564 Cluster: CRANTZ hydroxyproline-rich glycoprotein; n=1; Manihot esculenta|Rep: CRANTZ hydroxyproline-rich glycoprotein - Manihot esculenta (Cassava) (Manioc), partial (66%)			231	SPPPPVKSPPPPYHYT	16	9.5	79	230
1	Asteraceae	Helianthus	annuus	TC	BU025672 3 [Helianthus annuus 6] BU025672 similar to UniRef100_Q9M564 Cluster: CRANTZ hydroxyproline-rich glycoprotein; n=1; Manihot esculenta|Rep: CRANTZ hydroxyproline-rich glycoprotein - Manihot esculenta (Cassava) (Manioc), partial (39%)			220	SPPPPVKSPPPPYHYT	16	5.25	61	145
1	Asteraceae	Lactuca	sativa	TC	TC25656 1 [Lactuca sativa 3] TC25656 similar to UniRef100_Q9M564 Cluster: CRANTZ hydroxyproline-rich glycoprotein; n=1; Manihot esculenta|Rep: CRANTZ hydroxyproline-rich glycoprotein - Manihot esculenta (Cassava) (Manioc), partial (72%)			289	SPPPPVKSPPPPYHYT	16	10.75	117	288
1	Asteraceae	Lactuca	sativa	TC	TC26805 2 [Lactuca sativa 3] TC26805 similar to UniRef100_Q41707 Cluster: Extensin class 1 protein precursor; n=2; Vigna unguiculata|Rep: Extensin class 1 protein precursor - Vigna unguiculata (Cowpea), partial (60%)			323	SPPPPVKSPPPPYHYT	16	18.56	26	322
1	Asteraceae	Lactuca	sativa	TC	TC27050 1 [Lactuca sativa 3] TC27050 similar to UniRef100_Q9M564 Cluster: CRANTZ hydroxyproline-rich glycoprotein; n=1; Manihot esculenta|Rep: CRANTZ hydroxyproline-rich glycoprotein - Manihot esculenta (Cassava) (Manioc), partial (58%)			137	SPPPPVKSPPPPYHYT	16	8.31	2	136
1	Asteraceae	Lactuca	sativa	TC	TC27649 3 [Lactuca sativa 3] TC27649 similar to UniRef100_Q9M564 Cluster: CRANTZ hydroxyproline-rich glycoprotein; n=1; Manihot esculenta|Rep: CRANTZ hydroxyproline-rich glycoprotein - Manihot esculenta (Cassava) (Manioc), partial (82%)			227	SPPPPVKSPPPPYHYT	16	9.31	78	226
1	Asteraceae	Lactuca	sativa	TC	TC28052 1 [Lactuca sativa 3] TC28052 similar to UniRef100_Q40793 Cluster: Tyrosine-rich hydroxyproline-rich glycoprotein; n=1; Petroselinum crispum|Rep: Tyrosine-rich hydroxyproline-rich glycoprotein - Petroselinum crispum (Parsley) (Petroselinum hortense), partial (34%)			486	SPPPPVKSPPPPYHYT	16	4.94	275	353
1	Asteraceae	Lactuca	sativa	TC	BQ852015 2 [Lactuca sativa 3] BQ852015 similar to UniRef100_Q09085 Cluster: Hydroxyproline-rich glycoprotein; n=1; Phaseolus vulgaris|Rep: Hydroxyproline-rich glycoprotein - Phaseolus vulgaris (Kidney bean) (French bean), partial (45%)			200	SPPPPVKSPPPPYHYT	16	9.69	26	180
1	Asteraceae	Lactuca	serriola	TC	TC6858 3 [Lactuca serriola 1] TC6858 similar to UniRef100_Q9M564 Cluster: CRANTZ hydroxyproline-rich glycoprotein; n=1; Manihot esculenta|Rep: CRANTZ hydroxyproline-rich glycoprotein - Manihot esculenta (Cassava) (Manioc), partial (92%)			317	SPPPPVKSPPPPYHYT	16	16.56	38	302
1	Asteraceae	Lactuca	serriola	TC	TC7375 3 [Lactuca serriola 1] TC7375 similar to UniRef100_Q9M564 Cluster: CRANTZ hydroxyproline-rich glycoprotein; n=1; Manihot esculenta|Rep: CRANTZ hydroxyproline-rich glycoprotein - Manihot esculenta (Cassava) (Manioc), partial (88%)			341	SPPPPVKSPPPPYHYT	16	12.75	0	203
1	Asteraceae	Lactuca	perennis	TA	DW091467 1 [Lactuca perennis release] DW091467			214	SPPPPVKSPPPPYHYT	16	2.88	10	55
1	Asteraceae	Lactuca	perennis	TA	DW097634 1 [Lactuca perennis release] DW097634 60S acidic ribosomal protein P3 [Lactuca saligna]			289	SPPPPVKSPPPPYHYT	16	6.56	166	270
1	Asparagaceae	Asparagus	officinalis	TA	CV292346 1 [Asparagus officinalis release] CV292346			291	SPPPPVKSPPPPYHYT	16	6.38	1	102
1	Rosaceae	Prunus	persica	TC	DY646171 3 [Prunus persica 2] DY646171 similar to UniRef100_Q41707 Cluster: Extensin class 1 protein precursor; n=2; Vigna unguiculata|Rep: Extensin class 1 protein precursor - Vigna unguiculata (Cowpea), partial (31%)			201	PPPYHYKSPPPPSHSP	16	7.62	71	193
1	Salicaceae	Populus	trichocarpa	NR	gi|224072815|ref|XP_002303895.1| predicted protein [Populus trichocarpa] gi|222841327|gb|EEE78874.1| predicted protein [Populus trichocarpa]			202	PPPYHYKSPPPPSPSP	16	9.94	40	200
1	Brassicaceae	Arabidopsis	thaliana	NR	gi|12248386|dbj|BAB20085.1| extensin 4 [Arabidopsis thaliana]	AT1G76930	EXT1,EXT4	246	SPPPVYKSPPPPVKHY	16	13.5	24	243
1	Brassicaceae	Arabidopsis	thaliana	NR	gi|21263615|sp|Q38913.2|EXTN1_ARATH RecName: Full=Extensin-1; Short=AtExt1; Short=AtExt4; Flags: Precursor gi|2829922|gb|AAC00630.1| extensin [Arabidopsis thaliana]	AT1G76930	EXT1,EXT4	373	SPPPVYKSPPPPVKHY	16	21.5	24	370
1	Brassicaceae	Arabidopsis	thaliana	NR	gi|18411288|ref|NP_565143.1| ATEXT4 (EXTENSIN 4); structural constituent of cell wall [Arabidopsis thaliana]	AT1G76930	EXT1,EXT4	256	SPPPVYKSPPPPVKHY	16	8.31	28	160
1	Brassicaceae	Arabidopsis	thaliana	NR	gi|30699212|ref|NP_849895.1| ATEXT4 (EXTENSIN 4); structural constituent of cell wall [Arabidopsis thaliana]	AT1G76930	EXT1,EXT4	293	SPPPVYKSPPPPVKHY	16	8.31	28	160
1	Solanaceae	Solanum	lycopersicum	NR	gi|1345536|emb|CAA39214.1| extensin (class I) [Solanum lycopersicum]			90	PPPYVYKSPPPPSPSP	16	5.62	0	89
1	Fabaceae	Glycine	max	NR	gi|255645675|gb|ACU23331.1| unknown [Glycine max]			146	PPPYVYKSPPPPSPSP	16	4.25	55	124
1	Pteridaceae	Adiantum	capillus-veneris	NR	gi|4033606|dbj|BAA35135.1| Extensin [Adiantum capillus-veneris]			207	PPPYIYKSPPPPSPSP	16	7.69	72	195
1	Salicaceae	Populus	trichocarpa	NR	gi|224055044|ref|XP_002298407.1| predicted protein [Populus trichocarpa] gi|222845665|gb|EEE83212.1| predicted protein [Populus trichocarpa]			152	PPPYIYKSPPPPSPSP	16	9.12	1	148
1	Euphorbiaceae	Manihot	esculenta	NR	gi|7211797|gb|AAF40442.1|AF239615_1 CRANTZ hydroxyproline-rich glycoprotein [Manihot esculenta]			232	SPPPPVKSPPPPYYYH	16	13.31	12	224
1	Brassicaceae	Arabidopsis	thaliana	NR	gi|15224236|ref|NP_181844.1| proline-rich extensin-like family protein [Arabidopsis thaliana] gi|3763924|gb|AAC64304.1| putative extensin [Arabidopsis thaliana]	AT2G43150	EXT21	212	SPPPPVKSPPPPYYYH	16	10.94	34	208
1	Fabaceae	Glycine	max	TC	TC291904 1 [Glycine max 14] TC291904 homologue to UniRef100_Q39865 Cluster: Hydroxyproline-rich glycoprotein; n=1; Glycine max|Rep: Hydroxyproline-rich glycoprotein - Glycine max (Soybean), partial (72%)			212	PPPYYYKSPPPPSPSP	16	5.81	4	97
1	Fabaceae	Glycine	max	TC	TC292770 2 [Glycine max 14] TC292770 similar to UniRef100_Q43687 Cluster: Extensin-like protein; n=1; Vigna unguiculata|Rep: Extensin-like protein - Vigna unguiculata (Cowpea), partial (55%)			305	PPPYYYKSPPPPSPSP	16	5.81	47	139
1	Fabaceae	Glycine	max	TC	TC295952 2 [Glycine max 14] TC295952 homologue to UniRef100_Q41707 Cluster: Extensin class 1 protein precursor; n=2; Vigna unguiculata|Rep: Extensin class 1 protein precursor - Vigna unguiculata (Cowpea), partial (56%)			276	PPPYYYKSPPPPSPSP	16	16.81	5	275
1	Fabaceae	Glycine	max	TC	TC301532 2 [Glycine max 14] TC301532 similar to UniRef100_Q41707 Cluster: Extensin class 1 protein precursor; n=2; Vigna unguiculata|Rep: Extensin class 1 protein precursor - Vigna unguiculata (Cowpea), partial (69%)			441	PPPYYYKSPPPPSPSP	16	15.62	60	310
1	Fabaceae	Glycine	max	TC	TC304805 1 [Glycine max 14] TC304805 hydroxyproline-rich glycoprotein			373	PPPYYYKSPPPPSPSP	16	12.88	1	207
1	Fabaceae	Glycine	max	TC	TC309212 3 [Glycine max 14] TC309212 homologue to UniRef100_Q39865 Cluster: Hydroxyproline-rich glycoprotein; n=1; Glycine max|Rep: Hydroxyproline-rich glycoprotein - Glycine max (Soybean), partial (82%)			239	PPPYYYKSPPPPSPSP	16	7.88	1	126
1	Fabaceae	Glycine	max	TC	TC310185 3 [Glycine max 14] TC310185 homologue to UniRef100_Q39865 Cluster: Hydroxyproline-rich glycoprotein; n=1; Glycine max|Rep: Hydroxyproline-rich glycoprotein - Glycine max (Soybean), partial (72%)			167	PPPYYYKSPPPPSPSP	16	6.25	0	99
1	Fabaceae	Glycine	max	TC	TC311510 1 [Glycine max 14] TC311510 similar to UniRef100_Q39865 Cluster: Hydroxyproline-rich glycoprotein; n=1; Glycine max|Rep: Hydroxyproline-rich glycoprotein - Glycine max (Soybean), partial (75%)			299	PPPYYYKSPPPPSPSP	16	6.25	1	100
1	Fabaceae	Glycine	max	TC	TC311648 2 [Glycine max 14] TC311648 homologue to UniRef100_Q41707 Cluster: Extensin class 1 protein precursor; n=2; Vigna unguiculata|Rep: Extensin class 1 protein precursor - Vigna unguiculata (Cowpea), partial (30%)			147	PPPYYYKSPPPPSPSP	16	9.19	0	146
1	Fabaceae	Glycine	max	TC	TC311679 3 [Glycine max 14] TC311679 homologue to UniRef100_Q41707 Cluster: Extensin class 1 protein precursor; n=2; Vigna unguiculata|Rep: Extensin class 1 protein precursor - Vigna unguiculata (Cowpea), partial (44%)			370	PPPYYYKSPPPPSPSP	16	13.19	2	212
1	Fabaceae	Glycine	max	TC	TC311900 3 [Glycine max 14] TC311900 homologue to UniRef100_Q39865 Cluster: Hydroxyproline-rich glycoprotein; n=1; Glycine max|Rep: Hydroxyproline-rich glycoprotein - Glycine max (Soybean), partial (57%)			315	PPPYYYKSPPPPSPSP	16	5.81	0	93
1	Fabaceae	Glycine	max	TC	TC315846 2 [Glycine max 14] TC315846 homologue to UniRef100_Q09085 Cluster: Hydroxyproline-rich glycoprotein; n=1; Phaseolus vulgaris|Rep: Hydroxyproline-rich glycoprotein - Phaseolus vulgaris (Kidney bean) (French bean), partial (38%)			140	PPPYYYKSPPPPSPSP	16	8.69	0	139
1	Fabaceae	Glycine	max	TC	TC318806 1 [Glycine max 14] TC318806 homologue to UniRef100_Q41707 Cluster: Extensin class 1 protein precursor; n=2; Vigna unguiculata|Rep: Extensin class 1 protein precursor - Vigna unguiculata (Cowpea), partial (27%)			182	PPPYYYKSPPPPSPSP	16	7.94	0	126
1	Fabaceae	Glycine	max	TC	TC320759 1 [Glycine max 14] TC320759 similar to UniRef100_Q09085 Cluster: Hydroxyproline-rich glycoprotein; n=1; Phaseolus vulgaris|Rep: Hydroxyproline-rich glycoprotein - Phaseolus vulgaris (Kidney bean) (French bean), partial (42%)			211	PPPYYYKSPPPPSPSP	16	7.81	13	138
1	Fabaceae	Glycine	max	TC	TC331945 2 [Glycine max 14] TC331945 homologue to UniRef100_O65760 Cluster: Extensin; n=1; Cicer arietinum|Rep: Extensin - Cicer arietinum (Chickpea) (Garbanzo), partial (69%)			168	PPPYYYKSPPPPSPSP	16	7.69	2	126
1	Fabaceae	Glycine	max	TC	TC333575 3 [Glycine max 14] TC333575 homologue to UniRef100_Q43687 Cluster: Extensin-like protein; n=1; Vigna unguiculata|Rep: Extensin-like protein - Vigna unguiculata (Cowpea), partial (38%)			119	PPPYYYKSPPPPSPSP	16	5.69	7	98
1	Fabaceae	Glycine	max	TC	TC334031 3 [Glycine max 14] TC334031 similar to UniRef100_Q39865 Cluster: Hydroxyproline-rich glycoprotein; n=1; Glycine max|Rep: Hydroxyproline-rich glycoprotein - Glycine max (Soybean), partial (62%)			435	PPPYYYKSPPPPSPSP	16	5.69	66	156
1	Fabaceae	Glycine	max	TC	TC337425 3 [Glycine max 14] TC337425 similar to UniRef100_Q09085 Cluster: Hydroxyproline-rich glycoprotein; n=1; Phaseolus vulgaris|Rep: Hydroxyproline-rich glycoprotein - Phaseolus vulgaris (Kidney bean) (French bean), partial (40%)			174	PPPYYYKSPPPPSPSP	16	8	44	173
1	Fabaceae	Glycine	max	TC	TC338040 3 [Glycine max 14] TC338040 similar to UniRef100_Q41707 Cluster: Extensin class 1 protein precursor; n=2; Vigna unguiculata|Rep: Extensin class 1 protein precursor - Vigna unguiculata (Cowpea), partial (88%)			605	PPPYYYKSPPPPSPSP	16	29.19	3	469
1	Fabaceae	Glycine	max	TC	TC346283 2 [Glycine max 14] TC346283 homologue to UniRef100_Q09085 Cluster: Hydroxyproline-rich glycoprotein; n=1; Phaseolus vulgaris|Rep: Hydroxyproline-rich glycoprotein - Phaseolus vulgaris (Kidney bean) (French bean), partial (22%)			243	PPPYYYKSPPPPSPSP	16	4.69	82	156
1	Fabaceae	Glycine	max	TC	TC346919 1 [Glycine max 14] TC346919 similar to UniRef100_O65760 Cluster: Extensin; n=1; Cicer arietinum|Rep: Extensin - Cicer arietinum (Chickpea) (Garbanzo), partial (76%)			211	PPPYYYKSPPPPSPSP	16	8	63	190
1	Fabaceae	Glycine	max	TC	TC346972 2 [Glycine max 14] TC346972 similar to UniRef100_Q39865 Cluster: Hydroxyproline-rich glycoprotein; n=1; Glycine max|Rep: Hydroxyproline-rich glycoprotein - Glycine max (Soybean), partial (87%)			177	PPPYYYKSPPPPSPSP	16	2.19	26	60
1	Fabaceae	Glycine	max	TC	TC346972 3 [Glycine max 14] TC346972 similar to UniRef100_Q39865 Cluster: Hydroxyproline-rich glycoprotein; n=1; Glycine max|Rep: Hydroxyproline-rich glycoprotein - Glycine max (Soybean), partial (87%)			176	PPPYYYKSPPPPSPSP	16	5.56	69	159
1	Fabaceae	Glycine	max	TC	BQ629839 2 [Glycine max 14] BQ629839 homologue to UniRef100_Q39865 Cluster: Hydroxyproline-rich glycoprotein; n=1; Glycine max|Rep: Hydroxyproline-rich glycoprotein - Glycine max (Soybean), partial (59%)			138	PPPYYYKSPPPPSPSP	16	5.81	40	132
1	Fabaceae	Glycine	max	TC	AW101478 1 [Glycine max 14] AW101478 similar to UniRef100_Q41707 Cluster: Extensin class 1 protein precursor; n=2; Vigna unguiculata|Rep: Extensin class 1 protein precursor - Vigna unguiculata (Cowpea), partial (28%)			137	PPPYYYKSPPPPSPSP	16	8.06	2	131
1	Fabaceae	Glycine	max	TC	BE474051 3 [Glycine max 14] BE474051 homologue to UniRef100_Q43687 Cluster: Extensin-like protein; n=1; Vigna unguiculata|Rep: Extensin-like protein - Vigna unguiculata (Cowpea), partial (56%)			136	PPPYYYKSPPPPSPSP	16	7.38	10	134
1	Fabaceae	Glycine	max	TC	BE555344 1 [Glycine max 14] BE555344 homologue to UniRef100_O65760 Cluster: Extensin; n=1; Cicer arietinum|Rep: Extensin - Cicer arietinum (Chickpea) (Garbanzo), partial (60%)			120	PPPYYYKSPPPPSPSP	16	7.31	3	119
1	Fabaceae	Glycine	max	TC	BI321009 1 [Glycine max 14] BI321009 homologue to UniRef100_Q39865 Cluster: Hydroxyproline-rich glycoprotein; n=1; Glycine max|Rep: Hydroxyproline-rich glycoprotein - Glycine max (Soybean), partial (72%)			121	PPPYYYKSPPPPSPSP	16	7.31	0	117
1	Fabaceae	Glycine	max	TC	BG790202 1 [Glycine max 14] BG790202 similar to UniRef100_Q39865 Cluster: Hydroxyproline-rich glycoprotein; n=1; Glycine max|Rep: Hydroxyproline-rich glycoprotein - Glycine max (Soybean), partial (67%)			139	PPPYYYKSPPPPSPSP	16	5.62	18	107
1	Fabaceae	Glycine	max	TC	BQ080060 1 [Glycine max 14] BQ080060 similar to UniRef100_Q41707 Cluster: Extensin class 1 protein precursor; n=2; Vigna unguiculata|Rep: Extensin class 1 protein precursor - Vigna unguiculata (Cowpea), partial (29%)			140	PPPYYYKSPPPPSPSP	16	7.56	0	120
1	Fabaceae	Glycine	max	TC	BU764797 3 [Glycine max 14] BU764797 similar to UniRef100_Q41120 Cluster: Hydroxyproline-rich glycoprotein; n=1; Phaseolus vulgaris|Rep: Hydroxyproline-rich glycoprotein - Phaseolus vulgaris (Kidney bean) (French bean), partial (56%)			139	PPPYYYKSPPPPSPSP	16	4.62	1	76
1	Fabaceae	Glycine	max	TC	BU577461 1 [Glycine max 14] BU577461 similar to UniRef100_Q43682 Cluster: Extensin-like protein; n=1; Vigna unguiculata|Rep: Extensin-like protein - Vigna unguiculata (Cowpea), partial (49%)			118	PPPYYYKSPPPPSPSP	16	6.12	19	117
1	Malvaceae	Gossypium	hirsutum	TC	DR455671 3 [Gossypium hirsutum NoSp] DR455671 similar to UniRef100_Q94G00 Cluster: Peptidyl-prolyl cis-trans isomerase 1; n=1; Malus x domestica|Rep: Peptidyl-prolyl cis-trans isomerase 1 - Malus domestica (Apple) (Malus sylvestris), partial (90%)			229	PPPYYYKSPPPPSPSP	16	3	21	68
1	Fabaceae	Lotus	japonicus	TC	TC50744 2 [Lotus japonicus 5] TC50744 similar to UniRef100_Q41707 Cluster: Extensin class 1 protein precursor; n=2; Vigna unguiculata|Rep: Extensin class 1 protein precursor - Vigna unguiculata (Cowpea), partial (41%)			298	PPPYYYKSPPPPSPSP	16	12.56	0	201
1	Fabaceae	Lotus	japonicus	TC	TC56778 3 [Lotus japonicus 5] TC56778 homologue to UniRef100_Q09085 Cluster: Hydroxyproline-rich glycoprotein; n=1; Phaseolus vulgaris|Rep: Hydroxyproline-rich glycoprotein - Phaseolus vulgaris (Kidney bean) (French bean), partial (38%)			221	PPPYYYKSPPPPSPSP	16	9.06	1	145
1	Fabaceae	Lotus	japonicus	TC	AW164126 3 [Lotus japonicus 5] AW164126 similar to UniRef100_Q09085 Cluster: Hydroxyproline-rich glycoprotein; n=1; Phaseolus vulgaris|Rep: Hydroxyproline-rich glycoprotein - Phaseolus vulgaris (Kidney bean) (French bean), partial (32%)			123	PPPYYYKSPPPPSPSP	16	5.19	36	120
1	Rosaceae	Malus	domestica	TC	TC39524 2 [Malus domestica x] TC39524 homologue to UniRef100_Q41707 Cluster: Extensin class 1 protein precursor; n=2; Vigna unguiculata|Rep: Extensin class 1 protein precursor - Vigna unguiculata (Cowpea), partial (62%)			446	PPPYYYKSPPPPSPSP	16	18.81	0	300
1	Fabaceae	Medicago	truncatula	TC	TC124624 1 [Medicago truncatula 9] TC124624 homologue to UniRef100_Q39865 Cluster: Hydroxyproline-rich glycoprotein; n=1; Glycine max|Rep: Hydroxyproline-rich glycoprotein - Glycine max (Soybean), partial (69%)			230	PPPYYYKSPPPPSPSP	16	6.69	3	109
1	Fabaceae	Medicago	truncatula	TC	TC124965 1 [Medicago truncatula 9] TC124965 similar to UniRef100_Q41120 Cluster: Hydroxyproline-rich glycoprotein; n=1; Phaseolus vulgaris|Rep: Hydroxyproline-rich glycoprotein - Phaseolus vulgaris (Kidney bean) (French bean), partial (51%)			220	PPPYYYKSPPPPSPSP	16	4.31	3	71
1	Fabaceae	Medicago	truncatula	TC	TC130603 2 [Medicago truncatula 9] TC130603 homologue to UniRef100_Q09085 Cluster: Hydroxyproline-rich glycoprotein; n=1; Phaseolus vulgaris|Rep: Hydroxyproline-rich glycoprotein - Phaseolus vulgaris (Kidney bean) (French bean), partial (36%)			244	PPPYYYKSPPPPSPSP	16	8	0	127
1	Fabaceae	Medicago	truncatula	TC	TC131495 2 [Medicago truncatula 9] TC131495 homologue to UniRef100_O65760 Cluster: Extensin; n=1; Cicer arietinum|Rep: Extensin - Cicer arietinum (Chickpea) (Garbanzo), partial (78%)			269	PPPYYYKSPPPPSPSP	16	8.5	0	135
1	Fabaceae	Medicago	truncatula	TC	TC137319 2 [Medicago truncatula 9] TC137319 similar to UniRef100_Q41707 Cluster: Extensin class 1 protein precursor; n=2; Vigna unguiculata|Rep: Extensin class 1 protein precursor - Vigna unguiculata (Cowpea), partial (70%)			801	PPPYYYKSPPPPSPSP	16	9.88	42	199
1	Fabaceae	Medicago	truncatula	TC	AL367277 1 [Medicago truncatula 9] AL367277 homologue to UniRef100_Q01943 Cluster: Extensin; n=1; Solanum lycopersicum|Rep: Extensin - Solanum lycopersicum (Tomato) (Lycopersicon esculentum), partial (46%)			84	PPPYYYKSPPPPSPSP	16	3.56	0	56
1	Fabaceae	Medicago	truncatula	TC	AL372685 2 [Medicago truncatula 9] AL372685 UniRef100_Q01942 Cluster: Extensin; n=1; Solanum lycopersicum|Rep: Extensin - Solanum lycopersicum (Tomato) (Lycopersicon esculentum), partial (40%)			135	PPPYYYKSPPPPSPSP	16	3.38	79	134
1	Fabaceae	Medicago	truncatula	TC	AW685919 1 [Medicago truncatula 9] AW685919 homologue to UniRef100_Q09082 Cluster: Extensin; n=1; Solanum lycopersicum|Rep: Extensin - Solanum lycopersicum (Tomato) (Lycopersicon esculentum), partial (23%)			221	PPPYYYKSPPPPSPSP	16	4.62	2	75
1	Fabaceae	Medicago	truncatula	TC	AJ847424 1 [Medicago truncatula 9] AJ847424 homologue to UniRef100_Q41707 Cluster: Extensin class 1 protein precursor; n=2; Vigna unguiculata|Rep: Extensin class 1 protein precursor - Vigna unguiculata (Cowpea), partial (24%)			118	PPPYYYKSPPPPSPSP	16	7.38	0	117
1	Fabaceae	Phaseolus	vulgaris	TC	TC12406 1 [Phaseolus vulgaris 3] TC12406 UniRef100_Q41120 Cluster: Hydroxyproline-rich glycoprotein; n=1; Phaseolus vulgaris|Rep: Hydroxyproline-rich glycoprotein - Phaseolus vulgaris (Kidney bean) (French bean), partial (87%)			480	PPPYYYKSPPPPSPSP	16	7.56	1	121
1	Fabaceae	Phaseolus	vulgaris	TC	TC12923 1 [Phaseolus vulgaris 3] TC12923 UniRef100_Q09085 Cluster: Hydroxyproline-rich glycoprotein; n=1; Phaseolus vulgaris|Rep: Hydroxyproline-rich glycoprotein - Phaseolus vulgaris (Kidney bean) (French bean), partial (34%)			253	PPPYYYKSPPPPSPSP	16	7.69	0	122
1	Fabaceae	Phaseolus	vulgaris	TC	TC14119 3 [Phaseolus vulgaris 3] TC14119 homologue to UniRef100_O04216 Cluster: Extensin; n=1; Bromheadia finlaysoniana|Rep: Extensin - Bromheadia finlaysoniana (Orchid), partial (70%)			192	PPPYYYKSPPPPSPSP	16	3.12	142	191
1	Fabaceae	Phaseolus	vulgaris	TC	TC16734 2 [Phaseolus vulgaris 3] TC16734 homologue to UniRef100_Q41707 Cluster: Extensin class 1 protein precursor; n=2; Vigna unguiculata|Rep: Extensin class 1 protein precursor - Vigna unguiculata (Cowpea), partial (46%)			250	PPPYYYKSPPPPSPSP	16	13.88	0	222
1	Fabaceae	Phaseolus	vulgaris	TC	CV543516 2 [Phaseolus vulgaris 3] CV543516 homologue to UniRef100_Q09085 Cluster: Hydroxyproline-rich glycoprotein; n=1; Phaseolus vulgaris|Rep: Hydroxyproline-rich glycoprotein - Phaseolus vulgaris (Kidney bean) (French bean), partial (18%)			215	PPPYYYKSPPPPSPSP	16	3.94	134	196
1	Pinaceae	Picea	glauca	TC	TC55577 1 [Picea glauca NoSp] TC55577 similar to UniRef100_Q41707 Cluster: Extensin class 1 protein precursor; n=2; Vigna unguiculata|Rep: Extensin class 1 protein precursor - Vigna unguiculata (Cowpea), partial (36%)			283	PPPYYYKSPPPPSPSP	16	10.5	0	169
1	Pinaceae	Picea	glauca	TC	TC68469 1 [Picea glauca NoSp] TC68469 similar to UniRef100_Q43687 Cluster: Extensin-like protein; n=1; Vigna unguiculata|Rep: Extensin-like protein - Vigna unguiculata (Cowpea), partial (39%)			228	PPPYYYKSPPPPSPSP	16	5.69	0	90
1	Pinaceae	Picea	glauca	TC	DV985544 3 [Picea glauca NoSp] DV985544 similar to UniRef100_Q09085 Cluster: Hydroxyproline-rich glycoprotein; n=1; Phaseolus vulgaris|Rep: Hydroxyproline-rich glycoprotein - Phaseolus vulgaris (Kidney bean) (French bean), partial (39%)			228	PPPYYYKSPPPPSPSP	16	8.62	88	225
1	Pinaceae	Pinus	taeda	TC	TC104879 3 [Pinus taeda NoSp] TC104879 similar to UniRef100_Q43687 Cluster: Extensin-like protein; n=1; Vigna unguiculata|Rep: Extensin-like protein - Vigna unguiculata (Cowpea), partial (48%)			231	PPPYYYKSPPPPSPSP	16	7.19	0	115
1	Pinaceae	Pinus	taeda	TC	CO362760 3 [Pinus taeda NoSp] CO362760 similar to UniRef100_Q41707 Cluster: Extensin class 1 protein precursor; n=2; Vigna unguiculata|Rep: Extensin class 1 protein precursor - Vigna unguiculata (Cowpea), partial (42%)			233	PPPYYYKSPPPPSPSP	16	12.56	31	232
1	Salicaceae	Populus	trichocarpa	TC	TC106790 2 [Populus trichocarpa NoSp] TC106790 similar to UniRef100_Q39835 Cluster: Extensin; n=1; Glycine max|Rep: Extensin - Glycine max (Soybean), partial (65%)			376	PPPYYYKSPPPPSPSP	16	11.75	3	190
1	Salicaceae	Populus	trichocarpa	TC	TC127449 3 [Populus trichocarpa NoSp] TC127449 homologue to UniRef100_Q09082 Cluster: Extensin; n=1; Solanum lycopersicum|Rep: Extensin - Solanum lycopersicum (Tomato) (Lycopersicon esculentum), partial (33%)			279	PPPYYYKSPPPPSPSP	16	6.06	12	108
1	Salicaceae	Populus	trichocarpa	TC	AJ776370 2 [Populus trichocarpa NoSp] AJ776370 homologue to UniRef100_Q41120 Cluster: Hydroxyproline-rich glycoprotein; n=1; Phaseolus vulgaris|Rep: Hydroxyproline-rich glycoprotein - Phaseolus vulgaris (Kidney bean) (French bean), partial (51%)			118	PPPYYYKSPPPPSPSP	16	4.25	6	73
1	Solanaceae	Solanum	lycopersicum	TC	TC202017 3 [Solanum lycopersicum 12] TC202017 homologue to UniRef100_Q09082 Cluster: Extensin; n=1; Solanum lycopersicum|Rep: Extensin - Solanum lycopersicum (Tomato) (Lycopersicon esculentum), partial (26%)			244	PPPYYYKSPPPPSPSP	16	6	0	95
1	Solanaceae	Solanum	lycopersicum	TC	TC216971 1 [Solanum lycopersicum 12] TC216971 homologue to UniRef100_Q09085 Cluster: Hydroxyproline-rich glycoprotein; n=1; Phaseolus vulgaris|Rep: Hydroxyproline-rich glycoprotein - Phaseolus vulgaris (Kidney bean) (French bean), partial (54%)			318	PPPYYYKSPPPPSPSP	16	8.06	140	268
1	Solanaceae	Solanum	lycopersicum	TC	NP000406 2 [Solanum lycopersicum 12] NP000406 GB|X55685.1|CAA39215.1 extensin (class I)			246	PPPYYYKSPPPPSPSP	16	12.19	49	243
1	Solanaceae	Solanum	lycopersicum	TC	NP000408 1 [Solanum lycopersicum 12] NP000408 GB|X55682.1|CAA39213.1 extensin (class I)			119	PPPYYYKSPPPPSPSP	16	3.88	2	63
1	Solanaceae	Solanum	lycopersicum	TC	AW626306 1 [Solanum lycopersicum 12] AW626306 homologue to UniRef100_Q09082 Cluster: Extensin; n=1; Solanum lycopersicum|Rep: Extensin - Solanum lycopersicum (Tomato) (Lycopersicon esculentum), partial (32%)			141	PPPYYYKSPPPPSPSP	16	7.62	0	121
1	Solanaceae	Solanum	lycopersicum	TC	BP879739 1 [Solanum lycopersicum 12] BP879739 homologue to UniRef100_Q09082 Cluster: Extensin; n=1; Solanum lycopersicum|Rep: Extensin - Solanum lycopersicum (Tomato) (Lycopersicon esculentum), partial (33%)			158	PPPYYYKSPPPPSPSP	16	3.75	68	127
1	Solanaceae	Solanum	tuberosum	TC	TC174974 1 [Solanum tuberosum 12] TC174974 homologue to UniRef100_Q09082 Cluster: Extensin; n=1; Solanum lycopersicum|Rep: Extensin - Solanum lycopersicum (Tomato) (Lycopersicon esculentum), partial (36%)			288	PPPYYYKSPPPPSPSP	16	4.44	56	126
1	Solanaceae	Solanum	tuberosum	TC	TC174974 3 [Solanum tuberosum 12] TC174974 homologue to UniRef100_Q09082 Cluster: Extensin; n=1; Solanum lycopersicum|Rep: Extensin - Solanum lycopersicum (Tomato) (Lycopersicon esculentum), partial (36%)			287	PPPYYYKSPPPPSPSP	16	3.44	0	54
1	Solanaceae	Solanum	tuberosum	TC	TC182777 3 [Solanum tuberosum 12] TC182777 homologue to UniRef100_Q41707 Cluster: Extensin class 1 protein precursor; n=2; Vigna unguiculata|Rep: Extensin class 1 protein precursor - Vigna unguiculata (Cowpea), partial (55%)			408	PPPYYYKSPPPPSPSP	16	16.94	0	271
1	Solanaceae	Solanum	tuberosum	TC	TC182968 2 [Solanum tuberosum 12] TC182968 homologue to UniRef100_Q09085 Cluster: Hydroxyproline-rich glycoprotein; n=1; Phaseolus vulgaris|Rep: Hydroxyproline-rich glycoprotein - Phaseolus vulgaris (Kidney bean) (French bean), partial (34%)			221	PPPYYYKSPPPPSPSP	16	4.81	0	76
1	Solanaceae	Solanum	tuberosum	TC	TC187386 1 [Solanum tuberosum 12] TC187386 homologue to UniRef100_Q41707 Cluster: Extensin class 1 protein precursor; n=2; Vigna unguiculata|Rep: Extensin class 1 protein precursor - Vigna unguiculata (Cowpea), partial (75%)			451	PPPYYYKSPPPPSPSP	16	22.44	0	358
1	Solanaceae	Solanum	tuberosum	TC	TC188988 1 [Solanum tuberosum 12] TC188988 homologue to UniRef100_Q09082 Cluster: Extensin; n=1; Solanum lycopersicum|Rep: Extensin - Solanum lycopersicum (Tomato) (Lycopersicon esculentum), partial (20%)			187	PPPYYYKSPPPPSPSP	16	4.56	1	73
1	Solanaceae	Solanum	tuberosum	TC	TC190237 3 [Solanum tuberosum 12] TC190237 homologue to UniRef100_Q09082 Cluster: Extensin; n=1; Solanum lycopersicum|Rep: Extensin - Solanum lycopersicum (Tomato) (Lycopersicon esculentum), partial (28%)			244	PPPYYYKSPPPPSPSP	16	4.5	15	86
1	Solanaceae	Solanum	tuberosum	TC	TC190966 1 [Solanum tuberosum 12] TC190966 UniRef100_Q8H9E1 Cluster: Extensin; n=1; Solanum tuberosum|Rep: Extensin - Solanum tuberosum (Potato), complete			280	PPPYYYKSPPPPSPSP	16	5.56	0	90
1	Solanaceae	Solanum	tuberosum	TC	CK275253 2 [Solanum tuberosum 12] CK275253 similar to UniRef100_Q40793 Cluster: Tyrosine-rich hydroxyproline-rich glycoprotein; n=1; Petroselinum crispum|Rep: Tyrosine-rich hydroxyproline-rich glycoprotein - Petroselinum crispum (Parsley) (Petroselinum hortense), partial (81%)			277	PPPYYYKSPPPPSPSP	16	2.06	0	32
1	Solanaceae	Solanum	tuberosum	TC	CV430620 3 [Solanum tuberosum 12] CV430620 homologue to UniRef100_Q09082 Cluster: Extensin; n=1; Solanum lycopersicum|Rep: Extensin - Solanum lycopersicum (Tomato) (Lycopersicon esculentum), partial (26%)			198	PPPYYYKSPPPPSPSP	16	5.56	0	88
1	Solanaceae	Solanum	tuberosum	TC	BI920727 3 [Solanum tuberosum 12] BI920727 homologue to UniRef100_Q09085 Cluster: Hydroxyproline-rich glycoprotein; n=1; Phaseolus vulgaris|Rep: Hydroxyproline-rich glycoprotein - Phaseolus vulgaris (Kidney bean) (French bean), partial (48%)			215	PPPYYYKSPPPPSPSP	16	10.94	2	176
1	Solanaceae	Solanum	tuberosum	TC	BI178610 3 [Solanum tuberosum 12] BI178610 similar to UniRef100_A7Q0V7 Cluster: Chromosome chr7 scaffold_42, whole genome shotgun sequence; n=1; Vitis vinifera|Rep: Chromosome chr7 scaffold_42, whole genome shotgun sequence - Vitis vinifera (Grape), partial (11%)			206	PPPYYYKSPPPPSPSP	16	3.19	0	50
1	Solanaceae	Capsicum	annuum	TC	TC18358 1 [Capsicum annuum 4] TC18358 homologue to UniRef100_Q41707 Cluster: Extensin class 1 protein precursor; n=2; Vigna unguiculata|Rep: Extensin class 1 protein precursor - Vigna unguiculata (Cowpea), partial (48%)			404	PPPYYYKSPPPPSPSP	16	14.56	4	237
1	Solanaceae	Capsicum	annuum	TC	TC23811 3 [Capsicum annuum 4] TC23811 similar to UniRef100_Q09083 Cluster: Hydroxyproline-rich glycoprotein precursor; n=1; Phaseolus vulgaris|Rep: Hydroxyproline-rich glycoprotein precursor - Phaseolus vulgaris (Kidney bean) (French bean), partial (44%)			268	PPPYYYKSPPPPSPSP	16	9.44	3	153
1	Fabaceae	Glycine	soja	TA	TA2247_3848 1 [Glycine soja release] TA2247_3848 Extensin precusor [Arabidopsis thaliana (Mouse-ear cress)]			129	PPPYYYKSPPPPSPSP	16	5.81	1	93
1	Fabaceae	Glycine	soja	TA	TA2250_3848 1 [Glycine soja release] TA2250_3848 Extensin precusor [Arabidopsis thaliana (Mouse-ear cress)]			229	PPPYYYKSPPPPSPSP	16	6.88	0	109
1	Malvaceae	Gossypium	arboreum	TA	TA5384_29729 2 [Gossypium arboreum release] TA5384_29729			305	PPPYYYKSPPPPSPSP	16	3.75	27	86
1	Plantaginaceae	Antirrhinum	majus	TA	AJ804637 1 [Antirrhinum majus release] AJ804637			210	PPPYYYKSPPPPSPSP	16	7.88	0	125
1	Fabaceae	Lotus	corniculatus	TA	TA432_47247 3 [Lotus corniculatus release] TA432_47247 Hydroxyproline-rich glycoprotein related cluster			324	PPPYYYKSPPPPSPSP	16	13.88	1	223
1	Fabaceae	Lotus	corniculatus	TA	AW164126 2 [Lotus corniculatus release] AW164126 Hydroxyproline-rich glycoprotein related cluster			128	PPPYYYKSPPPPSPSP	16	5.19	41	125
1	Fabaceae	Medicago	sativa	TA	CO511939 2 [Medicago sativa release] CO511939			207	PPPYYYKSPPPPSPSP	16	5.44	1	88
1	Solanaceae	Nicotiana	sylvestris	TA	BP752656 2 [Nicotiana sylvestris release] BP752656			66	PPPYYYKSPPPPSPSP	16	4	1	64
1	Orchidaceae	Phalaenopsis	violacea	TA	CK858122 3 [Phalaenopsis violacea release] CK858122			169	PPPYYYKSPPPPSPSP	16	2.25	107	142
1	Salicaceae	Populus	deltoides	TA	CX169973 2 [Populus deltoides release] CX169973 Extensin precusor [Arabidopsis thaliana (Mouse-ear cress)]			223	PPPYYYKSPPPPSPSP	16	11.75	3	190
1	Salicaceae	Populus	deltoides	TA	CX177084 3 [Populus deltoides release] CX177084 Extensin precusor [Arabidopsis thaliana (Mouse-ear cress)]			183	PPPYYYKSPPPPSPSP	16	8	12	139
1	Salicaceae	Populus	euphratica	TA	TA2862_75702 3 [Populus euphratica release] TA2862_75702 Extensin precusor [Arabidopsis thaliana (Mouse-ear cress)]			234	PPPYYYKSPPPPSPSP	16	5.19	2	84
1	Salicaceae	Populus	euphratica	TA	AJ776370 2 [Populus euphratica release] AJ776370			118	PPPYYYKSPPPPSPSP	16	4.25	6	73
1	Fabaceae	Trifolium	pratense	TA	TA25_57577 1 [Trifolium pratense release] TA25_57577 Extensin precusor [Arabidopsis thaliana (Mouse-ear cress)]			340	PPPYYYKSPPPPSPSP	16	9.31	93	241
1	Fabaceae	Trifolium	pratense	TA	TA82_57577 1 [Trifolium pratense release] TA82_57577 Extensin precusor [Arabidopsis thaliana (Mouse-ear cress)]			266	PPPYYYKSPPPPSPSP	16	2.56	225	265
1	Fabaceae	Trifolium	pratense	TA	TA175_57577 2 [Trifolium pratense release] TA175_57577 Extensin precusor [Arabidopsis thaliana (Mouse-ear cress)]			303	PPPYYYKSPPPPSPSP	16	3.44	248	302
1	Fabaceae	Trifolium	pratense	TA	TA339_57577 1 [Trifolium pratense release] TA339_57577 Extensin precusor [Arabidopsis thaliana (Mouse-ear cress)]			220	PPPYYYKSPPPPSPSP	16	8.25	83	214
1	Fabaceae	Trifolium	pratense	TA	TA367_57577 2 [Trifolium pratense release] TA367_57577 Extensin precusor [Arabidopsis thaliana (Mouse-ear cress)]			253	PPPYYYKSPPPPSPSP	16	7.75	129	252
1	Fabaceae	Trifolium	pratense	TA	TA1511_57577 1 [Trifolium pratense release] TA1511_57577 Extensin precusor [Arabidopsis thaliana (Mouse-ear cress)]			315	PPPYYYKSPPPPSPSP	16	3.69	3	61
1	Fabaceae	Trifolium	pratense	TA	BB931785 2 [Trifolium pratense release] BB931785 Extensin precusor [Arabidopsis thaliana (Mouse-ear cress)]			89	PPPYYYKSPPPPSPSP	16	5.38	3	88
1	Fabaceae	Trifolium	pratense	TA	BB932409 1 [Trifolium pratense release] BB932409			105	PPPYYYKSPPPPSPSP	16	2.56	64	104
1	Fabaceae	Trifolium	pratense	TA	BB932643 1 [Trifolium pratense release] BB932643			303	PPPYYYKSPPPPSPSP	16	2.62	45	86
1	Fabaceae	Trifolium	pratense	TA	BB933706 3 [Trifolium pratense release] BB933706 Extensin precusor [Arabidopsis thaliana (Mouse-ear cress)]			213	PPPYYYKSPPPPSPSP	16	4.56	132	204
1	Fabaceae	Trifolium	pratense	TA	BB934487 3 [Trifolium pratense release] BB934487			197	PPPYYYKSPPPPSPSP	16	2.31	157	193
1	Fabaceae	Trifolium	pratense	TA	BB937161 3 [Trifolium pratense release] BB937161 Extensin precusor [Arabidopsis thaliana (Mouse-ear cress)]			267	PPPYYYKSPPPPSPSP	16	2.62	80	121
1	Fabaceae	Trifolium	pratense	TA	BB937285 1 [Trifolium pratense release] BB937285			152	PPPYYYKSPPPPSPSP	16	3.75	43	102
1	Fabaceae	Trifolium	pratense	TA	BB937517 2 [Trifolium pratense release] BB937517 Extensin precusor [Arabidopsis thaliana (Mouse-ear cress)]			175	PPPYYYKSPPPPSPSP	16	5.75	80	174
1	Zamiaceae	Zamia	fischeri	TA	DY034501 1 [Zamia fischeri release] DY034501 RRNA intron-encoded homing endonuclease [Oryza sativa (Rice)]			96	PPPYYYKSPPPPSPSP	16	2.88	50	95
1	Fabaceae	Cicer	arietinum	TA	AJ006770 3 [Cicer arietinum release] AJ006770 Extensin precusor [Arabidopsis thaliana (Mouse-ear cress)]			339	PPPYYYKSPPPPSPSP	16	10.75	0	171
1	Cucurbitaceae	Citrullus	lanatus	TA	AI563554 2 [Citrullus lanatus release] AI563554 No annotation for UniRef100_Q41707			159	PPPYYYKSPPPPSPSP	16	6	0	95
1	Fabaceae	Vigna	unguiculata	NR	gi|1015937|emb|CAA62943.1| extensin class 1 protein [Vigna unguiculata]			489	PPPYYYKSPPPPSPSP	16	26	49	476
1	Orchidaceae	Bromheadia	finlaysoniana	NR	gi|2108256|emb|CAA73601.1| extensin [Bromheadia finlaysoniana]			71	PPPYYYKSPPPPSPSP	16	4.38	0	69
1	Fabaceae	Vigna	unguiculata	NR	gi|791148|emb|CAA60021.1| extensin-like protein [Vigna unguiculata]			242	PPPYYYKSPPPPSPSP	16	9.44	72	223
1	Fabaceae	Vigna	unguiculata	NR	gi|791150|emb|CAA60022.1| extensin-like protein [Vigna unguiculata]			164	PPPYYYKSPPPPSPSP	16	10	0	161
1	Salicaceae	Populus	trichocarpa	NR	gi|224069044|ref|XP_002302886.1| predicted protein [Populus trichocarpa] gi|222844612|gb|EEE82159.1| predicted protein [Populus trichocarpa]			153	PPPYYYKSPPPPSPSP	16	8.75	0	139
1	Salicaceae	Populus	trichocarpa	NR	gi|224128918|ref|XP_002320453.1| predicted protein [Populus trichocarpa] gi|222861226|gb|EEE98768.1| predicted protein [Populus trichocarpa]			379	PPPYYYKSPPPPSPSP	16	20.94	41	375
1	Euphorbiaceae	Ricinus	communis	NR	gi|255544846|ref|XP_002513484.1| extensin, proline-rich protein, putative [Ricinus communis] gi|223547392|gb|EEF48887.1| extensin, proline-rich protein, putative [Ricinus communis]			144	PPPYYYKSPPPPSPSP	16	4.31	31	101
1	Solanaceae	Solanum	lycopersicum	NR	gi|1345537|emb|CAA39215.1| extensin (class I) [Solanum lycopersicum]			181	PPPYYYKSPPPPSPSP	16	11.25	1	180
1	Solanaceae	Solanum	lycopersicum	NR	gi|1345535|emb|CAA39213.1| extensin (class I) [Solanum lycopersicum]			67	PPPYYYKSPPPPSPSP	16	4	0	66
1	Fabaceae	Cicer	arietinum	NR	gi|3204132|emb|CAA07235.1| extensin [Cicer arietinum]			192	PPPYYYKSPPPPSPSP	16	10.75	0	171
1	Solanaceae	Solanum	lycopersicum	NR	gi|1345531|emb|CAA39212.1| extensin (class I) [Solanum lycopersicum]			132	PPPYYYKSPPPPSPSP	16	6	0	95
1	Solanaceae	Solanum	tuberosum	NR	gi|24745586|dbj|BAC23027.1| extensin [Solanum tuberosum]			152	PPPYYYKSPPPPSPSP	16	5.56	0	90
1	Fabaceae	Medicago	truncatula	TC	CX533293 3 [Medicago truncatula 9] CX533293 similar to UniRef100_Q39835 Cluster: Extensin; n=1; Glycine max|Rep: Extensin - Glycine max (Soybean), partial (37%)	AC231338_13.1	Extensin-like region	172	PPPPHYKYKSPPPPVYS	17	3.88	93	158
1	Fabaceae	Medicago	truncatula	TC	BG586609 1 [Medicago truncatula 9] BG586609 similar to UniRef100_Q39835 Cluster: Extensin; n=1; Glycine max|Rep: Extensin - Glycine max (Soybean), partial (40%)	AC231338_13.1	Extensin-like region	224	PPPPHYKYKSPPPPVYS	17	4	108	175
1	Fabaceae	Trifolium	pratense	TA	TA39_57577 2 [Trifolium pratense release] TA39_57577 Extensin precusor [Arabidopsis thaliana (Mouse-ear cress)]			340	PPPPHYKYKSPPPPVYS	17	3.88	180	245
1	Fabaceae	Trifolium	pratense	TA	BB933591 1 [Trifolium pratense release] BB933591 Extensin precusor [Arabidopsis thaliana (Mouse-ear cress)]			202	PPPPHYKYKSPPPPVYS	17	4.47	80	155
1	Orobanchaceae	Triphysaria	pusilla	TC	DR171228 3 [Triphysaria pusilla NoSp] DR171228 similar to UniRef100_Q6GUG3 Cluster: Serine/proline-rich repeat protein; n=2; Lupinus angustifolius|Rep: Serine/proline-rich repeat protein - Lupinus angustifolius (Narrow-leaved blue lupin), partial (45%)			145	PPPPPSKSPPPPTYYYK	17	4.35	70	143
1	Orobanchaceae	Triphysaria	versicolor	TC	DR171228 3 [Triphysaria versicolor 2] DR171228 similar to UniRef100_Q6GUG3 Cluster: Serine/proline-rich repeat protein; n=2; Lupinus angustifolius|Rep: Serine/proline-rich repeat protein - Lupinus angustifolius (Narrow-leaved blue lupin), partial (45%)			145	PPPPPSKSPPPPTYYYK	17	4.35	70	143
1	Rosaceae	Prunus	armeniaca	TA	TA2370_36596 1 [Prunus armeniaca release] TA2370_36596 Extensin precusor [Arabidopsis thaliana (Mouse-ear cress)]			312	SPPPPSPSPPKHPYHYK	17	9.41	3	165
1	Rosaceae	Prunus	cerasus	TA	EE487998 1 [Prunus cerasus release] EE487998 Extensin precusor [Arabidopsis thaliana (Mouse-ear cress)]			206	SPPPPSPSPPKHPYHYK	17	3.76	0	63
1	Rosaceae	Prunus	cerasus	TA	EE488777 1 [Prunus cerasus release] EE488777 Extensin precusor [Arabidopsis thaliana (Mouse-ear cress)]			206	SPPPPSPSPPKHPYHYK	17	4.47	46	121
1	Rosaceae	Prunus	dulcis	TA	TA348_3755 2 [Prunus dulcis release] TA348_3755 Extensin precusor [Arabidopsis thaliana (Mouse-ear cress)]			373	SPPPPSPSPPKHPYHYK	17	11.35	36	239
1	Salicaceae	Populus	tremula	TA	TA6827_113636 1 [Populus tremula release] TA6827_113636			161	SPPPPPVHPPPPPYHYK	17	3.12	102	156
1	Rosaceae	Malus	domestica	TC	TC41452 3 [Malus domestica x] TC41452 similar to UniRef100_Q40768 Cluster: Extensin precursor; n=1; Prunus dulcis|Rep: Extensin precursor - Prunus dulcis (Almond) (Prunus amygdalus), partial (61%)			191	PPPPVYAPPKHPYHPKS	17	3.82	64	129
1	Rosaceae	Malus	domestica	TC	CN910195 1 [Malus domestica x] CN910195 similar to UniRef100_Q40768 Cluster: Extensin precursor; n=1; Prunus dulcis|Rep: Extensin precursor - Prunus dulcis (Almond) (Prunus amygdalus), partial (66%)			192	PPPPVYAPPKHPYHPKS	17	3.06	59	111
1	Rosaceae	Prunus	dulcis	NR	gi|20420|emb|CAA46634.1| extensin [Prunus dulcis] gi|445616|prf||1909363A extensin			278	SPPPPSPSPPKHPYHYK	17	11.35	38	241
1	Fabaceae	Glycine	max	TC	TC318916 1 [Glycine max 14] TC318916 similar to UniRef100_Q40768 Cluster: Extensin precursor; n=1; Prunus dulcis|Rep: Extensin precursor - Prunus dulcis (Almond) (Prunus amygdalus), partial (18%)			81	HSPPPPSPPPPPKKPYYY	18	2.83	30	80
1	Fabaceae	Glycine	max	TC	TC337816 2 [Glycine max 14] TC337816 similar to UniRef100_Q40768 Cluster: Extensin precursor; n=1; Prunus dulcis|Rep: Extensin precursor - Prunus dulcis (Almond) (Prunus amygdalus), partial (32%)			207	HSPPPPSPPPPPKKPYYY	18	3.72	47	113
1	Fabaceae	Glycine	max	TC	FK023777 1 [Glycine max 14] FK023777 similar to UniRef100_Q40768 Cluster: Extensin precursor; n=1; Prunus dulcis|Rep: Extensin precursor - Prunus dulcis (Almond) (Prunus amygdalus), partial (30%)			263	HSPPPPSPPPPPKKPYYY	18	3.67	49	114
1	Salicaceae	Populus	trichocarpa	TC	TC120181 1 [Populus trichocarpa NoSp] TC120181 weakly similar to UniRef100_Q09083 Cluster: Hydroxyproline-rich glycoprotein precursor; n=1; Phaseolus vulgaris|Rep: Hydroxyproline-rich glycoprotein precursor - Phaseolus vulgaris (Kidney bean) (French bean), partial (43%)			457	PPPPPVHKPPPPTHPYKYKS	20	13.45	61	341
1	Rosaceae	Fragaria	vesca	TA	TA1999_57918 2 [Fragaria vesca release] TA1999_57918 Extensin precusor [Arabidopsis thaliana (Mouse-ear cress)]			522	PSPTPPVYSPPKHPHYPPKSP	21	5.33	241	354
1	Rosaceae	Fragaria	vesca	TA	TA2000_57918 3 [Fragaria vesca release] TA2000_57918 Extensin precusor [Arabidopsis thaliana (Mouse-ear cress)]			497	PSPTPPVYSPPKHPHYPPKSP	21	5.05	272	377
1	Rosaceae	Fragaria	vesca	TA	DV440210 1 [Fragaria vesca release] DV440210			190	PSPTPPVYSPPKHPHYPPKSP	21	3.1	0	64
1	Rosaceae	Fragaria	vesca	TA	DV440473 1 [Fragaria vesca release] DV440473 Extensin precusor [Arabidopsis thaliana (Mouse-ear cress)]			330	PSPTPPVYSPPKHPHYPPKSP	21	3.1	111	175
1	Rosaceae	Rosa	hybrid	TA	EC586897 3 [Rosa hybrid cultivar] EC586897			159	PSPTPPVYSPPKHPHYPPKSP	21	4	11	94
1	Salicaceae	Populus	trichocarpa	TC	TC127639 1 [Populus trichocarpa NoSp] TC127639 similar to UniRef100_Q39835 Cluster: Extensin; n=1; Glycine max|Rep: Extensin - Glycine max (Soybean), partial (28%)			194	PPPPPVHSPPPPPHPYKYKSP	21	3.38	41	112
1	Salicaceae	Populus	euphratica	TA	AJ776538 1 [Populus euphratica release] AJ776538 Extensin-3 precursor [Arabidopsis thaliana (Mouse-ear cress)]			119	PPPPPVHSPPPPPHPYKYKSP	21	3.67	41	118
1	Salicaceae	Populus	x	TA	CX187427 3 [Populus x canadensis] CX187427 Extensin precusor [Arabidopsis thaliana (Mouse-ear cress)]			202	PPPPPVHSPPPPPHPYKYKSP	21	6.52	45	182
1	Rutaceae	Citrus	clementina	TC	TC40345 1 [Citrus clementina 2] TC40345 homologue to UniRef100_Q40402 Cluster: Extensin (ext) precursor; n=1; Nicotiana plumbaginifolia|Rep: Extensin (ext) precursor - Nicotiana plumbaginifolia (Leadwort-leaved tobacco), partial (23%)			206	PPTPVYHSPPPPKKPYKYKSPP	22	2.55	0	55
1	Rutaceae	Citrus	clementina	TC	TC42120 2 [Citrus clementina 2] TC42120 homologue to UniRef100_Q40402 Cluster: Extensin (ext) precursor; n=1; Nicotiana plumbaginifolia|Rep: Extensin (ext) precursor - Nicotiana plumbaginifolia (Leadwort-leaved tobacco), partial (27%)			229	PPTPVYHSPPPPKKPYKYKSPP	22	3.14	101	169
1	Rutaceae	Citrus	sinensis	TC	TC14423 3 [Citrus sinensis 1] TC14423 homologue to UniRef100_Q06802 Cluster: Extensin; n=1; Nicotiana tabacum|Rep: Extensin - Nicotiana tabacum (Common tobacco), partial (33%)			277	PPTPVYHSPPPPKKPYKYKSPP	22	5.23	1	115
1	Rutaceae	Citrus	sinensis	TC	TC16385 2 [Citrus sinensis 1] TC16385 homologue to UniRef100_Q40502 Cluster: Extensin precursor; n=1; Nicotiana tabacum|Rep: Extensin precursor - Nicotiana tabacum (Common tobacco), partial (37%)			249	PPTPVYHSPPPPKKPYKYKSPP	22	3	0	65
1	Rutaceae	Citrus	sinensis	TC	TC17011 1 [Citrus sinensis 1] TC17011 homologue to UniRef100_Q40402 Cluster: Extensin (ext) precursor; n=1; Nicotiana plumbaginifolia|Rep: Extensin (ext) precursor - Nicotiana plumbaginifolia (Leadwort-leaved tobacco), partial (36%)			383	PPTPVYHSPPPPKKPYKYKSPP	22	6.68	0	147
1	Rutaceae	Citrus	sinensis	TC	TC19821 1 [Citrus sinensis 1] TC19821 similar to UniRef100_Q06802 Cluster: Extensin; n=1; Nicotiana tabacum|Rep: Extensin - Nicotiana tabacum (Common tobacco), partial (66%)			296	PPTPVYHSPPPPKKPYKYKSPP	22	6.86	83	233
1	Rutaceae	Citrus	sinensis	TC	TC22077 2 [Citrus sinensis 1] TC22077 homologue to UniRef100_Q40402 Cluster: Extensin (ext) precursor; n=1; Nicotiana plumbaginifolia|Rep: Extensin (ext) precursor - Nicotiana plumbaginifolia (Leadwort-leaved tobacco), partial (29%)			203	PPTPVYHSPPPPKKPYKYKSPP	22	3.14	6	74
1	Rutaceae	Citrus	sinensis	TC	EY687009 2 [Citrus sinensis 1] EY687009 homologue to UniRef100_Q40402 Cluster: Extensin (ext) precursor; n=1; Nicotiana plumbaginifolia|Rep: Extensin (ext) precursor - Nicotiana plumbaginifolia (Leadwort-leaved tobacco), partial (16%)			291	PPTPVYHSPPPPKKPYKYKSPP	22	3	4	69
1	Salicaceae	Populus	deltoides	TA	TA2059_3696 2 [Populus deltoides release] TA2059_3696 Extensin precusor [Arabidopsis thaliana (Mouse-ear cress)]			312	PPPVHSPPPPPPKHPYKYKSPPP	23	11.83	37	309
1	Salicaceae	Populus	deltoides	TA	CX176556 2 [Populus deltoides release] CX176556 Extensin precusor [Arabidopsis thaliana (Mouse-ear cress)]			202	PPPVHSPPPPPPKHPYKYKSPPP	23	7.87	21	201
1	Salicaceae	Populus	trichocarpa	TC	TC106555 3 [Populus trichocarpa NoSp] TC106555 similar to UniRef100_Q09083 Cluster: Hydroxyproline-rich glycoprotein precursor; n=1; Phaseolus vulgaris|Rep: Hydroxyproline-rich glycoprotein precursor - Phaseolus vulgaris (Kidney bean) (French bean), partial (43%)			470	PPPVHSPPPPPPTHPYKYKSPPP	23	10.78	43	290
1	Salicaceae	Populus	trichocarpa	TC	TC132322 2 [Populus trichocarpa NoSp] TC132322 similar to UniRef100_P06599 Cluster: Extensin precursor; n=1; Daucus carota|Rep: Extensin precursor - Daucus carota (Carrot), partial (68%)			334	PPPVHSPPPPPPTHPYKYKSPPP	23	7.43	62	234
1	Salicaceae	Populus	deltoides	TA	CX168137 2 [Populus deltoides release] CX168137 Extensin precusor [Arabidopsis thaliana (Mouse-ear cress)]			209	PPPVHSPPPPPPTHPYKYKSPPP	23	4.7	6	113
1	Salicaceae	Populus	deltoides	TA	CX168963 3 [Populus deltoides release] CX168963 Extensin precusor [Arabidopsis thaliana (Mouse-ear cress)]			222	PPPVHSPPPPPPTHPYKYKSPPP	23	7.74	43	220
1	Salicaceae	Populus	trichocarpa	TC	CX168998 3 [Populus trichocarpa NoSp] CX168998 similar to UniRef100_Q06446 Cluster: Extensin; n=1; Solanum tuberosum|Rep: Extensin - Solanum tuberosum (Potato), partial (30%)			216	HKKPVHKYSSPPPPHPVYKSPPPPP	25	2.6	35	99
1	Salicaceae	Populus	deltoides	TA	CX168998 3 [Populus deltoides release] CX168998 Extensin precusor [Arabidopsis thaliana (Mouse-ear cress)]			216	HKKPVHKYSSPPPPHPVYKSPPPPP	25	2.6	35	99
1	Brassicaceae	Brassica	napus	TC	TC64078 1 [Brassica napus 3-1] TC64078 UniRef100_Q8LK15 Cluster: Extensin; n=1; Brassica napus|Rep: Extensin - Brassica napus (Rape), complete			481	YSPQVYHSPPPPKKHYVYKSPPPPVKH	27	4.93	107	240
1	Brassicaceae	Brassica	napus	TC	TC78294 2 [Brassica napus 3-1] TC78294 similar to UniRef100_Q9FS16 Cluster: Extensin-3 precursor; n=1; Arabidopsis thaliana|Rep: Extensin-3 precursor - Arabidopsis thaliana (Mouse-ear cress), partial (43%)			255	YSPPVYKSPPPPKKDYEYKSPPPPVKH	27	2.96	48	127
1	Rubiaceae	Coffea	canephora	TC	DV703997 2 [Coffea canephora 1] DV703997 similar to UniRef100_Q9M6R7 Cluster: Extensin; n=1; Pisum sativum|Rep: Extensin - Pisum sativum (Garden pea), partial (41%)			180	SPPPVYKLPPPSPLVYKSPPPPPPHYN	27	2.41	67	131
1	Brassicaceae	Brassica	napus	NR	gi|22001410|gb|AAM88422.1|AF527384_1 extensin [Brassica napus]			259	YSPQVYHSPPPPKKHYVYKSPPPPVKH	27	4.93	107	240
1	Fabaceae	Medicago	truncatula	TC	TC126424 1 [Medicago truncatula 9] TC126424 similar to UniRef100_Q39835 Cluster: Extensin; n=1; Glycine max|Rep: Extensin - Glycine max (Soybean), partial (50%)	AC231338_13.1	Extensin-like region	232	PPPYHYSSPPPPPKPYKYASPPPPVHSP	28	2	36	95
1	Fabaceae	Medicago	truncatula	TC	TC137601 3 [Medicago truncatula 9] TC137601 homologue to UniRef100_Q09083 Cluster: Hydroxyproline-rich glycoprotein precursor; n=1; Phaseolus vulgaris|Rep: Hydroxyproline-rich glycoprotein precursor - Phaseolus vulgaris (Kidney bean) (French bean), partial (42%)			514	PPPYHYSSPPPPPKPYKYASPPPPVHSP	28	2	12	71
1	Fabaceae	Medicago	truncatula	TC	TC138272 3 [Medicago truncatula 9] TC138272 similar to UniRef100_Q9M6R7 Cluster: Extensin; n=1; Pisum sativum|Rep: Extensin - Pisum sativum (Garden pea), partial (77%)	AC231338_13.1	Extensin-like region	322	PPPYHYSSPPPPPKPYKYASPPPPVHSP	28	2	32	91
1	Fabaceae	Medicago	truncatula	TC	TC140501 1 [Medicago truncatula 9] TC140501 similar to UniRef100_Q9M6R7 Cluster: Extensin; n=1; Pisum sativum|Rep: Extensin - Pisum sativum (Garden pea), partial (87%)	AC231338_13.1	Extensin-like region	308	PPPYHYSSPPPPPKPYKYASPPPPVHSP	28	2	35	94
1	Fabaceae	Medicago	truncatula	TC	BF639374 3 [Medicago truncatula 9] BF639374 homologue to UniRef100_Q39835 Cluster: Extensin; n=1; Glycine max|Rep: Extensin - Glycine max (Soybean), partial (29%)			126	PPPYHYSSPPPPPKPYKYASPPPPVHSP	28	2.96	13	99
1	Fabaceae	Trifolium	pratense	TA	TA43_57577 3 [Trifolium pratense release] TA43_57577 Extensin precusor [Arabidopsis thaliana (Mouse-ear cress)]			325	PPPYHYSSPPPPPKPYKYASPPPPVHSP	28	2	28	87
1	Fabaceae	Trifolium	pratense	TA	BB933897 2 [Trifolium pratense release] BB933897 Extensin precusor [Arabidopsis thaliana (Mouse-ear cress)]			205	PPPYHYSSPPPPPKPYKYASPPPPVHSP	28	2	33	92
1	Fabaceae	Trifolium	pratense	TA	BB938625 1 [Trifolium pratense release] BB938625			121	PPPYHYSSPPPPPKPYKYASPPPPVHSP	28	2	32	91
1	Fabaceae	Trifolium	pratense	TA	BB938508 2 [Trifolium pratense release] BB938508			404	PPPAHYSSPPPPPKPYKYASPPPPVHSP	28	2	58	117
1	Brassicaceae	Arabidopsis	thaliana	TC	TC315115 2 [Arabidopsis thaliana 14] TC315115 UniRef100_Q9FS16 Cluster: Extensin-3 precursor; n=1; Arabidopsis thaliana|Rep: Extensin-3 precursor - Arabidopsis thaliana (Mouse-ear cress), complete	AT1G21310	EXT3,EXT5	554	SPPPVYHSPPPPKKHYVYKSPPPPVKHY	28	13.54	44	422
1	Brassicaceae	Arabidopsis	thaliana	TC	TC315115 2 [Arabidopsis thaliana 14] TC315115 UniRef100_Q9FS16 Cluster: Extensin-3 precursor; n=1; Arabidopsis thaliana|Rep: Extensin-3 precursor - Arabidopsis thaliana (Mouse-ear cress), complete	AT1G21310	EXT3,EXT5	554	SPPPVYHSPPPPKKHYVYKSPPPPVKHY	28	11.96	44	378
1	Brassicaceae	Arabidopsis	thaliana	TC	NP304863 1 [Arabidopsis thaliana 14] NP304863 GB|AB031821.1|BAB20086.1 extensin 5	AT1G21310	EXT3,EXT5	327	SPPPVYHSPPPPKKHYVYKSPPPPVKHY	28	3.96	45	155
1	Brassicaceae	Arabidopsis	thaliana	TC	NP304865 2 [Arabidopsis thaliana 14] NP304865 GB|AB031819.1|BAB20084.1 extensin 3	AT1G21310	EXT3,EXT5	368	SPPPVYHSPPPPKKHYVYKSPPPPVKHY	28	10.29	44	331
1	Brassicaceae	Arabidopsis	thaliana	TC	NP304865 2 [Arabidopsis thaliana 14] NP304865 GB|AB031819.1|BAB20084.1 extensin 3	AT1G21310	EXT3,EXT5	368	SPPPVYHSPPPPKKHYVYKSPPPPVKHY	28	9.96	44	322
1	Brassicaceae	Arabidopsis	thaliana	TC	AV536668 1 [Arabidopsis thaliana 14] AV536668 UniRef100_Q9FS16 Cluster: Extensin-3 precursor; n=1; Arabidopsis thaliana|Rep: Extensin-3 precursor - Arabidopsis thaliana (Mouse-ear cress), partial (18%)	AT1G20190	EXPANSIN 11 domain (fragment, putative extensin fusion)	147	SPPPVYHSPPPPKKHYVYKSPPPPVKHY	28	2.75	70	146
1	Brassicaceae	Arabidopsis	thaliana	TC	AV553292 2 [Arabidopsis thaliana 14] AV553292 UniRef100_Q9FS16 Cluster: Extensin-3 precursor; n=1; Arabidopsis thaliana|Rep: Extensin-3 precursor - Arabidopsis thaliana (Mouse-ear cress), partial (34%)			146	SPPPVYHSPPPPKKHYVYKSPPPPVKHY	28	5.21	0	145
1	Brassicaceae	Arabidopsis	thaliana	TC	AV549238 2 [Arabidopsis thaliana 14] AV549238 UniRef100_Q9FS16 Cluster: Extensin-3 precursor; n=1; Arabidopsis thaliana|Rep: Extensin-3 precursor - Arabidopsis thaliana (Mouse-ear cress), partial (26%)			113	SPPPVYHSPPPPKKHYVYKSPPPPVKHY	28	4.04	0	112
1	Brassicaceae	Arabidopsis	thaliana	TC	AV549526 3 [Arabidopsis thaliana 14] AV549526 UniRef100_Q9FS16 Cluster: Extensin-3 precursor; n=1; Arabidopsis thaliana|Rep: Extensin-3 precursor - Arabidopsis thaliana (Mouse-ear cress), partial (30%)			130	SPPPVYHSPPPPKKHYVYKSPPPPVKHY	28	4.64	0	129
1	Brassicaceae	Arabidopsis	thaliana	TC	AV553292 2 [Arabidopsis thaliana 14] AV553292 UniRef100_Q9FS16 Cluster: Extensin-3 precursor; n=1; Arabidopsis thaliana|Rep: Extensin-3 precursor - Arabidopsis thaliana (Mouse-ear cress), partial (34%)			146	SPPPVYHSPPPPKKHYVYKSPPPPVKHY	28	4.18	0	116
1	Brassicaceae	Arabidopsis	thaliana	TC	AV549238 2 [Arabidopsis thaliana 14] AV549238 UniRef100_Q9FS16 Cluster: Extensin-3 precursor; n=1; Arabidopsis thaliana|Rep: Extensin-3 precursor - Arabidopsis thaliana (Mouse-ear cress), partial (26%)			113	SPPPVYHSPPPPKKHYVYKSPPPPVKHY	28	3.89	1	109
1	Brassicaceae	Arabidopsis	thaliana	TC	AV552331 1 [Arabidopsis thaliana 14] AV552331 UniRef100_Q9FS16 Cluster: Extensin-3 precursor; n=1; Arabidopsis thaliana|Rep: Extensin-3 precursor - Arabidopsis thaliana (Mouse-ear cress), partial (24%)			105	SPPPVYHSPPPPKKHYVYKSPPPPVKHY	28	3.64	3	104
1	Brassicaceae	Arabidopsis	thaliana	TC	AV551107 1 [Arabidopsis thaliana 14] AV551107 homologue to UniRef100_Q9FS16 Cluster: Extensin-3 precursor; n=1; Arabidopsis thaliana|Rep: Extensin-3 precursor - Arabidopsis thaliana (Mouse-ear cress), partial (22%)			95	SPPPVYHSPPPPKKHYVYKSPPPPVKHY	28	2.79	17	94
1	Brassicaceae	Arabidopsis	thaliana	TC	BE526600 1 [Arabidopsis thaliana 14] BE526600 homologue to UniRef100_Q9FS16 Cluster: Extensin-3 precursor; n=1; Arabidopsis thaliana|Rep: Extensin-3 precursor - Arabidopsis thaliana (Mouse-ear cress), partial (20%)			85	SPPPVYHSPPPPKKHYVYKSPPPPVKHY	28	2.46	0	68
1	Brassicaceae	Arabidopsis	thaliana	TC	T46417 2 [Arabidopsis thaliana 14] T46417 homologue to UniRef100_Q9FS16 Cluster: Extensin-3 precursor; n=1; Arabidopsis thaliana|Rep: Extensin-3 precursor - Arabidopsis thaliana (Mouse-ear cress), partial (22%)			106	SPPPVYHSPPPPKKHYVYKSPPPPVKHY	28	3.11	0	86
1	Brassicaceae	Arabidopsis	thaliana	TC	CB254130 2 [Arabidopsis thaliana 14] CB254130 homologue to UniRef100_Q9FS16 Cluster: Extensin-3 precursor; n=1; Arabidopsis thaliana|Rep: Extensin-3 precursor - Arabidopsis thaliana (Mouse-ear cress), partial (19%)			143	SPPPVYHSPPPPKKHYVYKSPPPPVKHY	28	3.11	0	86
1	Brassicaceae	Arabidopsis	thaliana	TC	EG455760 1 [Arabidopsis thaliana 14] EG455760 UniRef100_Q9FS16 Cluster: Extensin-3 precursor; n=1; Arabidopsis thaliana|Rep: Extensin-3 precursor - Arabidopsis thaliana (Mouse-ear cress), partial (34%)			159	SPPPVYHSPPPPKKHYVYKSPPPPVKHY	28	5.18	8	152
1	Brassicaceae	Arabidopsis	thaliana	TC	EG482643 3 [Arabidopsis thaliana 14] EG482643 homologue to UniRef100_Q9FS16 Cluster: Extensin-3 precursor; n=1; Arabidopsis thaliana|Rep: Extensin-3 precursor - Arabidopsis thaliana (Mouse-ear cress), partial (39%)			249	SPPPVYHSPPPPKKHYVYKSPPPPVKHY	28	4	49	164
1	Brassicaceae	Arabidopsis	thaliana	TC	EG513498 3 [Arabidopsis thaliana 14] EG513498 homologue to UniRef100_Q9FS16 Cluster: Extensin-3 precursor; n=1; Arabidopsis thaliana|Rep: Extensin-3 precursor - Arabidopsis thaliana (Mouse-ear cress), partial (28%)			130	SPPPVYHSPPPPKKHYVYKSPPPPVKHY	28	4.43	1	124
1	Brassicaceae	Brassica	napus	TC	TC64475 3 [Brassica napus 3-1] TC64475 homologue to UniRef100_Q9FS16 Cluster: Extensin-3 precursor; n=1; Arabidopsis thaliana|Rep: Extensin-3 precursor - Arabidopsis thaliana (Mouse-ear cress), partial (66%)			324	SPPPVYHSPPPPKKHYVYKSPPPPVKHY	28	9.11	33	287
1	Brassicaceae	Brassica	napus	TC	TC69341 2 [Brassica napus 3-1] TC69341 homologue to UniRef100_Q9FS16 Cluster: Extensin-3 precursor; n=1; Arabidopsis thaliana|Rep: Extensin-3 precursor - Arabidopsis thaliana (Mouse-ear cress), partial (74%)			435	SPPPVYHSPPPPKKHYVYKSPPPPVKHY	28	7.68	0	214
1	Brassicaceae	Brassica	napus	TC	TC69341 3 [Brassica napus 3-1] TC69341 homologue to UniRef100_Q9FS16 Cluster: Extensin-3 precursor; n=1; Arabidopsis thaliana|Rep: Extensin-3 precursor - Arabidopsis thaliana (Mouse-ear cress), partial (74%)			434	SPPPVYHSPPPPKKHYVYKSPPPPVKHY	28	3.07	212	298
1	Brassicaceae	Brassica	napus	TC	TC70433 1 [Brassica napus 3-1] TC70433 homologue to UniRef100_Q9FS16 Cluster: Extensin-3 precursor; n=1; Arabidopsis thaliana|Rep: Extensin-3 precursor - Arabidopsis thaliana (Mouse-ear cress), partial (94%)			522	SPPPVYHSPPPPKKHYVYKSPPPPVKHY	28	12.93	39	400
1	Brassicaceae	Brassica	napus	TC	TC75747 1 [Brassica napus 3-1] TC75747 homologue to UniRef100_Q9FS16 Cluster: Extensin-3 precursor; n=1; Arabidopsis thaliana|Rep: Extensin-3 precursor - Arabidopsis thaliana (Mouse-ear cress), partial (73%)			481	SPPPVYHSPPPPKKHYVYKSPPPPVKHY	28	9.54	32	298
1	Brassicaceae	Brassica	napus	TC	TC86080 1 [Brassica napus 3-1] TC86080 homologue to UniRef100_Q9FS16 Cluster: Extensin-3 precursor; n=1; Arabidopsis thaliana|Rep: Extensin-3 precursor - Arabidopsis thaliana (Mouse-ear cress), partial (40%)			196	SPPPVYHSPPPPKKHYVYKSPPPPVKHY	28	5.18	38	182
1	Brassicaceae	Brassica	napus	TC	TC70433 1 [Brassica napus 3-1] TC70433 homologue to UniRef100_Q9FS16 Cluster: Extensin-3 precursor; n=1; Arabidopsis thaliana|Rep: Extensin-3 precursor - Arabidopsis thaliana (Mouse-ear cress), partial (94%)			522	SPPPVYHSPPPPKKHYVYKSPPPPVKHY	28	11.89	53	385
1	Brassicaceae	Brassica	napus	TC	TC89714 3 [Brassica napus 3-1] TC89714 homologue to UniRef100_Q9FS16 Cluster: Extensin-3 precursor; n=1; Arabidopsis thaliana|Rep: Extensin-3 precursor - Arabidopsis thaliana (Mouse-ear cress), partial (50%)			313	SPPPVYHSPPPPKKHYVYKSPPPPVKHY	28	4.25	30	148
1	Brassicaceae	Brassica	napus	TC	TC102188 3 [Brassica napus 3-1] TC102188 homologue to UniRef100_Q9FS16 Cluster: Extensin-3 precursor; n=1; Arabidopsis thaliana|Rep: Extensin-3 precursor - Arabidopsis thaliana (Mouse-ear cress), partial (52%)			411	SPPPVYHSPPPPKKHYVYKSPPPPVKHY	28	6.46	31	211
1	Brassicaceae	Brassica	napus	TC	TC110358 3 [Brassica napus 3-1] TC110358 homologue to UniRef100_Q9FS16 Cluster: Extensin-3 precursor; n=1; Arabidopsis thaliana|Rep: Extensin-3 precursor - Arabidopsis thaliana (Mouse-ear cress), partial (21%)			174	SPPPVYHSPPPPKKHYVYKSPPPPVKHY	28	3	63	146
1	Brassicaceae	Brassica	napus	TC	EV118397 2 [Brassica napus 3-1] EV118397 homologue to UniRef100_Q9FS16 Cluster: Extensin-3 precursor; n=1; Arabidopsis thaliana|Rep: Extensin-3 precursor - Arabidopsis thaliana (Mouse-ear cress), partial (40%)			220	SPPPVYHSPPPPKKHYVYKSPPPPVKHY	28	5.54	2	157
1	Brassicaceae	Brassica	napus	TC	EV115875 1 [Brassica napus 3-1] EV115875 homologue to UniRef100_Q9FS16 Cluster: Extensin-3 precursor; n=1; Arabidopsis thaliana|Rep: Extensin-3 precursor - Arabidopsis thaliana (Mouse-ear cress), partial (58%)			249	SPPPVYHSPPPPKKHYVYKSPPPPVKHY	28	8.5	0	244
1	Brassicaceae	Brassica	napus	TC	EV118397 2 [Brassica napus 3-1] EV118397 homologue to UniRef100_Q9FS16 Cluster: Extensin-3 precursor; n=1; Arabidopsis thaliana|Rep: Extensin-3 precursor - Arabidopsis thaliana (Mouse-ear cress), partial (40%)			220	SPPPVYHSPPPPKKHYVYKSPPPPVKHY	28	3.75	35	140
1	Brassicaceae	Brassica	napus	TC	EV115875 1 [Brassica napus 3-1] EV115875 homologue to UniRef100_Q9FS16 Cluster: Extensin-3 precursor; n=1; Arabidopsis thaliana|Rep: Extensin-3 precursor - Arabidopsis thaliana (Mouse-ear cress), partial (58%)			249	SPPPVYHSPPPPKKHYVYKSPPPPVKHY	28	5.29	61	208
1	Brassicaceae	Thlaspi	caerulescens	TA	DN923812 3 [Thlaspi caerulescens release] DN923812 Extensin [Brassica napus (Rape)]			160	SPPPVYHSPPPPKKHYVYKSPPPPVKHY	28	3.86	15	122
1	Brassicaceae	Brassica	oleracea	TA	TA1759_3712 2 [Brassica oleracea release] TA1759_3712 Extensin [Brassica napus (Rape)]			307	SPPPVYHSPPPPKKHYVYKSPPPPVKHY	28	6.68	0	186
1	Brassicaceae	Brassica	oleracea	TA	TA1760_3712 2 [Brassica oleracea release] TA1760_3712 Extensin precusor [Arabidopsis thaliana (Mouse-ear cress)]			276	SPPPVYHSPPPPKKHYVYKSPPPPVKHY	28	3.71	0	103
1	Brassicaceae	Brassica	oleracea	TA	TA1761_3712 1 [Brassica oleracea release] TA1761_3712 Extensin [Brassica napus (Rape)]			300	SPPPVYHSPPPPKKHYVYKSPPPPVKHY	28	9.25	0	258
1	Brassicaceae	Brassica	oleracea	TA	TA1761_3712 1 [Brassica oleracea release] TA1761_3712 Extensin [Brassica napus (Rape)]			300	SPPPVYHSPPPPKKHYVYKSPPPPVKHY	28	7.89	23	243
1	Brassicaceae	Brassica	oleracea	TA	AM057837 2 [Brassica oleracea release] AM057837 Extensin [Brassica napus (Rape)]			220	SPPPVYHSPPPPKKHYVYKSPPPPVKHY	28	6.04	0	168
1	Brassicaceae	Brassica	oleracea	TA	AM057986 1 [Brassica oleracea release] AM057986 Extensin [Brassica napus (Rape)]			198	SPPPVYHSPPPPKKHYVYKSPPPPVKHY	28	4.71	0	131
1	Brassicaceae	Brassica	oleracea	TA	AM060511 1 [Brassica oleracea release] AM060511 Extensin precusor [Arabidopsis thaliana (Mouse-ear cress)]			207	SPPPVYHSPPPPKKHYVYKSPPPPVKHY	28	2.96	0	82
1	Brassicaceae	Brassica	oleracea	TA	AM060799 2 [Brassica oleracea release] AM060799 Extensin [Brassica napus (Rape)]			208	SPPPVYHSPPPPKKHYVYKSPPPPVKHY	28	6.25	33	207
1	Brassicaceae	Brassica	oleracea	TA	AM061231 2 [Brassica oleracea release] AM061231 Extensin [Brassica napus (Rape)]			244	SPPPVYHSPPPPKKHYVYKSPPPPVKHY	28	5	0	141
1	Brassicaceae	Brassica	oleracea	TA	AM061562 3 [Brassica oleracea release] AM061562 Extensin [Brassica napus (Rape)]			106	SPPPVYHSPPPPKKHYVYKSPPPPVKHY	28	3.18	0	88
1	Brassicaceae	Brassica	oleracea	TA	AM388153 1 [Brassica oleracea release] AM388153 Extensin [Brassica napus (Rape)]			201	SPPPVYHSPPPPKKHYVYKSPPPPVKHY	28	5.25	36	182
1	Brassicaceae	Brassica	rapa	TA	BQ791766 3 [Brassica rapa release] BQ791766 Extensin [Brassica napus (Rape)]			156	SPPPVYHSPPPPKKHYVYKSPPPPVKHY	28	4.75	4	136
1	Brassicaceae	Arabidopsis	thaliana	TC	DR380874 3 [Arabidopsis thaliana 14] DR380874 homologue to UniRef100_Q9FS16 Cluster: Extensin-3 precursor; n=1; Arabidopsis thaliana|Rep: Extensin-3 precursor - Arabidopsis thaliana (Mouse-ear cress), partial (17%)			169	SPPPVYHSPPPPKKHYEYKSPPPPVKHY	28	2.54	0	70
1	Brassicaceae	Brassica	napus	TC	TC102563 3 [Brassica napus 3-1] TC102563 homologue to UniRef100_Q9FS16 Cluster: Extensin-3 precursor; n=1; Arabidopsis thaliana|Rep: Extensin-3 precursor - Arabidopsis thaliana (Mouse-ear cress), partial (29%)			216	SPPPVYHSPPPPKKHYEYKSPPPPVKHY	28	2.93	38	119
1	Brassicaceae	Brassica	napus	TC	EE432432 1 [Brassica napus 3-1] EE432432 homologue to UniRef100_Q9FS16 Cluster: Extensin-3 precursor; n=1; Arabidopsis thaliana|Rep: Extensin-3 precursor - Arabidopsis thaliana (Mouse-ear cress), partial (36%)			221	SPPPVYHSPPPPKKHYEYKSPPPPVKHY	28	3.96	38	148
1	Brassicaceae	Brassica	oleracea	TA	AM389166 1 [Brassica oleracea release] AM389166 Extensin [Brassica napus (Rape)]			205	SPPPVYHSPPPPKKHYEYKSPPPPVKHY	28	2.32	35	99
1	Fabaceae	Medicago	sativa	TA	CO513118 3 [Medicago sativa release] CO513118			167	PHSPPPKVYPPVSPPYHYSSPPPPKVYP	28	4.21	49	166
1	Fabaceae	Lotus	japonicus	TC	TC45723 2 [Lotus japonicus 5] TC45723 similar to UniRef100_Q9M6R7 Cluster: Extensin; n=1; Pisum sativum|Rep: Extensin - Pisum sativum (Garden pea), partial (50%)			227	PKPTYHSPPPPPKKPYKYPSPPPPVHVY	28	5.18	54	203
1	Brassicaceae	Thellungiella	salsuginea	TA	DN777975 2 [Thellungiella salsuginea release] DN777975 Extensin [Brassica napus (Rape)]			187	SPPPVYKSPPPPKKDYEYKSPPPPVKHY	28	3.93	75	184
1	Brassicaceae	Brassica	napus	TC	TC64179 2 [Brassica napus 3-1] TC64179 similar to UniRef100_Q9FS16 Cluster: Extensin-3 precursor; n=1; Arabidopsis thaliana|Rep: Extensin-3 precursor - Arabidopsis thaliana (Mouse-ear cress), partial (47%)			313	PPPPVYHSPPPPKKHYEYKSPPPPVYKS	28	5.07	34	175
1	Brassicaceae	Brassica	napus	TC	TC73335 2 [Brassica napus 3-1] TC73335 similar to UniRef100_A7P2L6 Cluster: Chromosome chr1 scaffold_5, whole genome shotgun sequence; n=1; Vitis vinifera|Rep: Chromosome chr1 scaffold_5, whole genome shotgun sequence - Vitis vinifera (Grape), partial (58%)			588	PPPPVYHSPPPPKKHYEYKSPPPPVYKS	28	4.21	229	346
1	Brassicaceae	Brassica	napus	TC	TC74615 2 [Brassica napus 3-1] TC74615 similar to UniRef100_Q9FS16 Cluster: Extensin-3 precursor; n=1; Arabidopsis thaliana|Rep: Extensin-3 precursor - Arabidopsis thaliana (Mouse-ear cress), partial (83%)			455	PPPPVYHSPPPPKKHYEYKSPPPPVYKS	28	10.68	44	342
1	Brassicaceae	Brassica	napus	TC	TC84948 2 [Brassica napus 3-1] TC84948 similar to UniRef100_Q9FS16 Cluster: Extensin-3 precursor; n=1; Arabidopsis thaliana|Rep: Extensin-3 precursor - Arabidopsis thaliana (Mouse-ear cress), partial (49%)			326	PPPPVYHSPPPPKKHYEYKSPPPPVYKS	28	5.86	54	217
1	Brassicaceae	Brassica	napus	TC	TC88120 3 [Brassica napus 3-1] TC88120 similar to UniRef100_Q9FS16 Cluster: Extensin-3 precursor; n=1; Arabidopsis thaliana|Rep: Extensin-3 precursor - Arabidopsis thaliana (Mouse-ear cress), partial (52%)			379	PPPPVYHSPPPPKKHYEYKSPPPPVYKS	28	5.54	83	237
1	Brassicaceae	Brassica	napus	TC	TC107759 1 [Brassica napus 3-1] TC107759 similar to UniRef100_Q9FS16 Cluster: Extensin-3 precursor; n=1; Arabidopsis thaliana|Rep: Extensin-3 precursor - Arabidopsis thaliana (Mouse-ear cress), partial (51%)			324	PPPPVYHSPPPPKKHYEYKSPPPPVYKS	28	5.82	43	205
1	Brassicaceae	Brassica	napus	TC	ES910362 2 [Brassica napus 3-1] ES910362 similar to UniRef100_Q9FS16 Cluster: Extensin-3 precursor; n=1; Arabidopsis thaliana|Rep: Extensin-3 precursor - Arabidopsis thaliana (Mouse-ear cress), partial (46%)			287	PPPPVYHSPPPPKKHYEYKSPPPPVYKS	28	4.96	61	203
1	Brassicaceae	Brassica	napus	TC	ES902262 1 [Brassica napus 3-1] ES902262 similar to UniRef100_Q9FS16 Cluster: Extensin-3 precursor; n=1; Arabidopsis thaliana|Rep: Extensin-3 precursor - Arabidopsis thaliana (Mouse-ear cress), partial (20%)			252	PPPPVYHSPPPPKKHYEYKSPPPPVYKS	28	3.11	165	251
1	Brassicaceae	Brassica	napus	TC	EV115662 3 [Brassica napus 3-1] EV115662 similar to UniRef100_Q39949 Cluster: Hydroxyproline-rich protein; n=1; Helianthus annuus|Rep: Hydroxyproline-rich protein - Helianthus annuus (Common sunflower), partial (38%)			154	PPPPVYHSPPPPKKHYEYKSPPPPVYKS	28	2.96	71	153
1	Brassicaceae	Brassica	oleracea	TA	TA1914_3712 1 [Brassica oleracea release] TA1914_3712 Extensin [Brassica napus (Rape)]			278	PPPPVYHSPPPPKKHYEYKSPPPPVYKS	28	4.04	24	136
1	Brassicaceae	Brassica	oleracea	TA	TA1916_3712 1 [Brassica oleracea release] TA1916_3712 Extensin [Brassica napus (Rape)]			392	PPPPVYHSPPPPKKHYEYKSPPPPVYKS	28	7.68	53	267
1	Brassicaceae	Brassica	rapa	TA	TA2321_3711 1 [Brassica rapa release] TA2321_3711 Extensin [Brassica napus (Rape)]			279	PPPPVYHSPPPPKKHYEYKSPPPPVYKS	28	4.29	159	278
1	Brassicaceae	Brassica	rapa	TA	BG544137 3 [Brassica rapa release] BG544137 Extensin [Brassica napus (Rape)]			156	PPPPVYHSPPPPKKHYEYKSPPPPVYKS	28	4.39	4	126
1	Brassicaceae	Brassica	rapa	TA	BQ791180 2 [Brassica rapa release] BQ791180 Extensin [Brassica napus (Rape)]			179	PPPPVYHSPPPPKKHYEYKSPPPPVYKS	28	2.75	99	175
1	Brassicaceae	Brassica	rapa	TA	BQ791645 3 [Brassica rapa release] BQ791645 Extensin [Brassica napus (Rape)]			118	PPPPVYHSPPPPKKHYEYKSPPPPVYKS	28	4.07	4	117
1	Brassicaceae	Brassica	rapa	TA	CV544562 2 [Brassica rapa release] CV544562 Extensin [Brassica napus (Rape)]			169	PPPPVYHSPPPPKKHYEYKSPPPPVYKS	28	5.21	23	168
1	Brassicaceae	Brassica	rapa	TA	CV544607 3 [Brassica rapa release] CV544607 Extensin [Brassica napus (Rape)]			202	PPPPVYHSPPPPKKHYEYKSPPPPVYKS	28	5.14	0	143
1	Brassicaceae	Arabidopsis	thaliana	NR	gi|12248384|dbj|BAB20084.1| extensin 3 [Arabidopsis thaliana]	AT1G21310	EXT3,EXT5	325	SPPPVYHSPPPPKKHYVYKSPPPPVKHY	28	10.29	33	320
1	Brassicaceae	Arabidopsis	thaliana	NR	gi|12248384|dbj|BAB20084.1| extensin 3 [Arabidopsis thaliana]	AT1G21310	EXT3,EXT5	325	SPPPVYHSPPPPKKHYVYKSPPPPVKHY	28	9.96	33	311
1	Brassicaceae	Arabidopsis	thaliana	NR	gi|12248388|dbj|BAB20086.1| extensin 5 [Arabidopsis thaliana]	AT1G21310	EXT3,EXT5	203	SPPPVYHSPPPPKKHYVYKSPPPPVKHY	28	3.96	33	143
1	Brassicaceae	Arabidopsis	thaliana	NR	gi|15218966|ref|NP_173553.1| ATEXT3 (EXTENSIN 3); structural constituent of cell wall [Arabidopsis thaliana] gi|8920638|gb|AAF81360.1|AC036104_9 Contains similarity to Extensin (atExt1) from Arabidopsis thaliana gb|U43627 and contains 12 concatamers of 28 amino acids rich in proline. ESTs gb|AA597816, gb|AA712635, gb|N65860, gb|AA598180, gb|H77085, gb|AA394416, gb|AA394413, gb|AA650774, gb|AA6507…	AT1G21310	EXT3,EXT5	431	SPPPVYHSPPPPKKHYVYKSPPPPVKHY	28	13.96	37	427
1	Brassicaceae	Arabidopsis	thaliana	NR	gi|15218966|ref|NP_173553.1| ATEXT3 (EXTENSIN 3); structural constituent of cell wall [Arabidopsis thaliana] gi|8920638|gb|AAF81360.1|AC036104_9 Contains similarity to Extensin (atExt1) from Arabidopsis thaliana gb|U43627 and contains 12 concatamers of 28 amino acids rich in proline. ESTs gb|AA597816, gb|AA712635, gb|N65860, gb|AA598180, gb|H77085, gb|AA394416, gb|AA394413, gb|AA650774, gb|AA6507…	AT1G21310	EXT3,EXT5	431	SPPPVYHSPPPPKKHYVYKSPPPPVKHY	28	11.96	37	371
1	Fabaceae	Glycine	max	TC	TC327171 1 [Glycine max 14] TC327171 homologue to UniRef100_Q39835 Cluster: Extensin; n=1; Glycine max|Rep: Extensin - Glycine max (Soybean), partial (39%)			182	PPPPPYKYPSPPPPVYKYKSPPPPYKYKS	29	3.41	80	181
1	Fabaceae	Trifolium	pratense	TA	TA1507_57577 2 [Trifolium pratense release] TA1507_57577 Extensin [Brassica napus (Rape)]			210	PPPPYHYSSPPPPPKKPYYYHSPPPPVYS	29	4.1	85	208
1	Rosaceae	Rosa	wichurana	TA	EC588090 3 [Rosa wichurana release] EC588090			139	PPPPPPSPPPPKKPYYPPKSPPKKPPHYSS	30	2.2	70	137
1	Apocynaceae	Catharanthus	roseus	TA	TA81_4058 2 [Catharanthus roseus release] TA81_4058 Cluster: Hypothetical protein F28B23.10; n=1; Arabidopsis thaliana|Rep: Hypothetical protein F28B23.10 - Arabidopsis thaliana (Mouse-ear cress)			312	PPPYVYHSPPPPPPVYKYKSPPPPPIHKSPP	31	2.19	38	106
1	Rutaceae	Citrus	clementina	TC	TC35754 2 [Citrus clementina 2] TC35754 similar to UniRef100_Q9FS16 Cluster: Extensin-3 precursor; n=1; Arabidopsis thaliana|Rep: Extensin-3 precursor - Arabidopsis thaliana (Mouse-ear cress), partial (41%)			245	PPTPVYHSPPPPKKPYKYKSPPPPTPVYHSP	31	4	106	229
1	Rutaceae	Citrus	clementina	TC	TC38461 3 [Citrus clementina 2] TC38461 homologue to UniRef100_Q40402 Cluster: Extensin (ext) precursor; n=1; Nicotiana plumbaginifolia|Rep: Extensin (ext) precursor - Nicotiana plumbaginifolia (Leadwort-leaved tobacco), partial (43%)			311	PPTPVYHSPPPPKKPYKYKSPPPPTPVYHSP	31	5.71	0	176
1	Rutaceae	Citrus	sinensis	TC	TC15049 2 [Citrus sinensis 1] TC15049 homologue to UniRef100_Q40402 Cluster: Extensin (ext) precursor; n=1; Nicotiana plumbaginifolia|Rep: Extensin (ext) precursor - Nicotiana plumbaginifolia (Leadwort-leaved tobacco), partial (22%)			212	PPTPVYHSPPPPKKPYKYKSPPPPTPVYHSP	31	2.97	0	91
1	Rutaceae	Citrus	sinensis	TC	TC17970 3 [Citrus sinensis 1] TC17970 similar to UniRef100_Q40402 Cluster: Extensin (ext) precursor; n=1; Nicotiana plumbaginifolia|Rep: Extensin (ext) precursor - Nicotiana plumbaginifolia (Leadwort-leaved tobacco), partial (36%)			445	PPTPVYHSPPPPKKPYKYKSPPPPTPVYHSP	31	4.42	57	193
1	Apocynaceae	Catharanthus	roseus	NR	gi|1486265|dbj|BAA13176.1| extensin [Catharanthus roseus]			217	PPPYVYHSPPPPPPVYKYKSPPPPPIHKSPP	31	2.19	24	92
1	Malvaceae	Theobroma	cacao	TC	TC12253 3 [Theobroma cacao 3] TC12253 similar to UniRef100_Q41707 Cluster: Extensin class 1 protein precursor; n=2; Vigna unguiculata|Rep: Extensin class 1 protein precursor - Vigna unguiculata (Cowpea), partial (31%)			235	YYKSPPPPSPSPPPPYYYESPPPPKHEEKPPY	32	4.69	84	234
1	Brassicaceae	Brassica	oleracea	TA	AM057141 2 [Brassica oleracea release] AM057141 Extensin [Brassica napus (Rape)]			161	PPPPVYHSPPPPKKHYEVKPITHHPPPPVKHY	32	2	57	117
1	Fabaceae	Trifolium	pratense	TA	TA367_57577 2 [Trifolium pratense release] TA367_57577 Extensin precusor [Arabidopsis thaliana (Mouse-ear cress)]			253	EYKSPPPPSPSPPPPYYYKSPPPPSEHKAPPY	32	3.94	77	203
1	Fabaceae	Trifolium	pratense	TA	BB933706 3 [Trifolium pratense release] BB933706 Extensin precusor [Arabidopsis thaliana (Mouse-ear cress)]			213	EYKSPPPPSPSPPPPYYYKSPPPPSEHKAPPY	32	3.88	80	204
1	Rosaceae	Malus	domestica	TC	CN914498 3 [Malus domestica x] CN914498 homologue to UniRef100_Q40768 Cluster: Extensin precursor; n=1; Prunus dulcis|Rep: Extensin precursor - Prunus dulcis (Almond) (Prunus amygdalus), partial (69%)			211	KHPYHYKSPPPPKKPYHYKSPPPPPTPPKYSPP	33	3.97	75	208
1	Fabaceae	Medicago	truncatula	TC	TC134810 1 [Medicago truncatula 9] TC134810 similar to UniRef100_Q43687 Cluster: Extensin-like protein; n=1; Vigna unguiculata|Rep: Extensin-like protein - Vigna unguiculata (Cowpea), partial (49%)			159	EYKSPPPPSPSPPPPYEYKSPPPPPSEHKAPPY	33	2.18	87	158
1	Fabaceae	Lotus	corniculatus	TA	BI420337 1 [Lotus corniculatus release] BI420337 Extensin related cluster			132	PPKKPYKYPSPPPPVYKYKSPPPPAYPHKSPPP	33	2	61	130
1	Solanaceae	Nicotiana	tabacum	TC	FG639647 2 [Nicotiana tabacum 5] FG639647 homologue to UniRef100_Q06802 Cluster: Extensin; n=1; Nicotiana tabacum|Rep: Extensin - Nicotiana tabacum (Common tobacco), partial (35%)			211	PKKPYYPSPTPYHPAPVYKSPPPPTPVNKSPPP	33	2	39	103
1	Brassicaceae	Brassica	oleracea	TA	AM389290 1 [Brassica oleracea release] AM389290 Extensin [Brassica napus (Rape)]			195	SPPPVYKSPPPPKKHYEYKSPPPPVYKSPPPPVHY	35	2.69	81	176
1	Fabaceae	Medicago	truncatula	TC	TC137319 2 [Medicago truncatula 9] TC137319 similar to UniRef100_Q41707 Cluster: Extensin class 1 protein precursor; n=2; Vigna unguiculata|Rep: Extensin class 1 protein precursor - Vigna unguiculata (Cowpea), partial (70%)			801	PTPYYYKSPPPPAPVYKYNSPPPPVHYYSPPYTYKSPPPPVKAA	44	4	360	535
1	Salicaceae	Populus	trichocarpa	TC	CX167737 1 [Populus trichocarpa NoSp] CX167737 similar to UniRef100_P06599 Cluster: Extensin precursor; n=1; Daucus carota|Rep: Extensin precursor - Daucus carota (Carrot), partial (47%)			211	PPPVHKSPPLPPKKPYHYKSPPPPPPVYHSPPPPVHPVYKYSSPP	45	2.07	37	128
1	Salicaceae	Populus	deltoides	TA	CX167737 1 [Populus deltoides release] CX167737 Extensin precusor [Arabidopsis thaliana (Mouse-ear cress)]			211	PPPVHKSPPLPPKKPYHYKSPPPPPPVYHSPPPPVHPVYKYSSPP	45	2.07	37	128
1	Ginkgoaceae	Ginkgo	biloba	TA	DR064702 1 [Ginkgo biloba release] DR064702 Extensin precusor [Arabidopsis thaliana (Mouse-ear cress)]			226	PPPPVYKYKSPPPPPYHYKSPPPPSPVYKYKSPPPPHHVKPPYHYKS	47	3.36	55	216
1	Fabaceae	Lotus	japonicus	TC	TC56182 3 [Lotus japonicus 5] TC56182 similar to UniRef100_Q94ES6 Cluster: Root nodule extensin; n=1; Pisum sativum|Rep: Root nodule extensin - Pisum sativum (Garden pea), partial (79%)			269	PVHTYPHPHPVYHSPPPPVHSPPPPPVHSPPPPPHEKHYKYASPPPP	47	2.23	47	152
1	Fabaceae	Lotus	corniculatus	TA	TA798_47247 3 [Lotus corniculatus release] TA798_47247 Root nodule extensin related cluster			274	PVHTYPHPHPVYHSPPPPVHSPPPPPVHSPPPPPHEKHYKYASPPPP	47	2.23	52	157
1	Fabaceae	Lotus	japonicus	TC	TC48903 1 [Lotus japonicus 5] TC48903 similar to UniRef100_Q94ES8 Cluster: Root nodule extensin; n=1; Pisum sativum|Rep: Root nodule extensin - Pisum sativum (Garden pea), partial (76%)			174	KHPKYHSPPPPPHKPYKYHSPPPPPHKPPHPYEHPHPVYHSPPPPPEK	48	2.06	36	134
1	Fabaceae	Lotus	corniculatus	TA	TA797_47247 1 [Lotus corniculatus release] TA797_47247 Root nodule extensin related cluster			165	KHPKYHSPPPPPHKPYKYHSPPPPPHKPPHPYEHPHPVYHSPPPPPEK	48	2.06	36	134
1	Rutaceae	Citrus	clementina	TC	TC35754 2 [Citrus clementina 2] TC35754 similar to UniRef100_Q9FS16 Cluster: Extensin-3 precursor; n=1; Arabidopsis thaliana|Rep: Extensin-3 precursor - Arabidopsis thaliana (Mouse-ear cress), partial (41%)			245	PPPPKKYPPPVASPPYHYTSPPPPKPVYHSPPQTPVYHSPPPTPVYHS	48	2.31	44	155
1	Salicaceae	Populus	trichocarpa	TC	TC108756 2 [Populus trichocarpa NoSp] TC108756 similar to UniRef100_P06599 Cluster: Extensin precursor; n=1; Daucus carota|Rep: Extensin precursor - Daucus carota (Carrot), partial (74%)			302	PPPPVKKSPPPPPPPYKYKSPPPPPPVHSPPPPPHPYKYKSPPPPPPVYKHKSP	54	3.67	41	244
1	Fabaceae	Medicago	truncatula	TC	TC118594 3 [Medicago truncatula 9] TC118594 similar to UniRef100_Q39835 Cluster: Extensin; n=1; Glycine max|Rep: Extensin - Glycine max (Soybean), partial (42%)	AC231338_13.1	Extensin-like region	490	LPKKPYKYPSPPPPIYKYKSPPPPYKYKSLPPPPPKKPYKYPSPPPPIYKYKSPPPP	57	2	55	170
1	Asteraceae	Lactuca	perennis	TA	TA1913_43195 3 [Lactuca perennis release] TA1913_43195 Extensin precusor [Arabidopsis thaliana (Mouse-ear cress)]			272	PPPPVYKSPPPPTPVYKSSPPPPKKPYVHKSPPPPPPVYKSPPPPPPKHKSPPPPVYKSPPPPVHKSPPPPVYKS	75	2.91	49	269
3	Brassicaceae	Arabidopsis	thaliana	TC	TC316211 3 [Arabidopsis thaliana 14] TC316211 UniRef100_UPI000150568E Cluster: pollen Ole e 1 allergen and extensin family protein; n=1; Arabidopsis thaliana|Rep: pollen Ole e 1 allergen and extensin family protein - Arabidopsis thaliana, partial (31%)	AT1G28290	AGP31	109	PPVK	4	6.25	80	104
3	Brassicaceae	Arabidopsis	thaliana	TC	TC315562 3 [Arabidopsis thaliana 14] TC315562 UniRef100_UPI000150568E Cluster: pollen Ole e 1 allergen and extensin family protein; n=1; Arabidopsis thaliana|Rep: pollen Ole e 1 allergen and extensin family protein - Arabidopsis thaliana, complete	AT1G28290	AGP31	439	PPVK	4	6.25	79	103
3	Brassicaceae	Arabidopsis	thaliana	TC	TC315562 3 [Arabidopsis thaliana 14] TC315562 UniRef100_UPI000150568E Cluster: pollen Ole e 1 allergen and extensin family protein; n=1; Arabidopsis thaliana|Rep: pollen Ole e 1 allergen and extensin family protein - Arabidopsis thaliana, complete	AT1G28290	AGP31	439	PPVK	4	24.5	107	204
3	Brassicaceae	Arabidopsis	thaliana	TC	TC315562 3 [Arabidopsis thaliana 14] TC315562 UniRef100_UPI000150568E Cluster: pollen Ole e 1 allergen and extensin family protein; n=1; Arabidopsis thaliana|Rep: pollen Ole e 1 allergen and extensin family protein - Arabidopsis thaliana, complete	AT1G28290	AGP31	439	PPVK	4	26.25	79	183
3	Rubiaceae	Coffea	canephora	TC	TC3334 3 [Coffea canephora 1] TC3334 similar to UniRef100_Q9FSW6 Cluster: Arabinogalactan protein precursor; n=1; Daucus carota|Rep: Arabinogalactan protein precursor - Daucus carota (Carrot), partial (21%)			270	PPVK	4	7.5	0	29
3	Rubiaceae	Coffea	canephora	TC	DV709394 3 [Coffea canephora 1] DV709394 homologue to UniRef100_Q41122 Cluster: Proline-rich protein precursor; n=1; Phaseolus vulgaris|Rep: Proline-rich protein precursor - Phaseolus vulgaris (Kidney bean) (French bean), partial (8%)			122	PPVK	4	5	72	91
3	Euphorbiaceae	Euphorbia	esula	TC	TC3908 3 [Euphorbia esula 1] TC3908 similar to UniRef100_P93705 Cluster: Hypocotil specific; n=1; Daucus carota|Rep: Hypocotil specific - Daucus carota (Carrot), partial (60%)			259	PPVK	4	5	61	82
3	Fabaceae	Glycine	max	TC	TC341533 3 [Glycine max 14] TC341533 homologue to UniRef100_Q41122 Cluster: Proline-rich protein precursor; n=1; Phaseolus vulgaris|Rep: Proline-rich protein precursor - Phaseolus vulgaris (Kidney bean) (French bean), partial (79%)			393	PPVK	4	3.75	155	171
3	Fabaceae	Glycine	max	TC	FK452363 3 [Glycine max 14] FK452363 similar to UniRef100_Q41122 Cluster: Proline-rich protein precursor; n=1; Phaseolus vulgaris|Rep: Proline-rich protein precursor - Phaseolus vulgaris (Kidney bean) (French bean), partial (11%)			66	PPVK	4	4.25	47	63
3	Malvaceae	Gossypium	hirsutum	TC	ES822520 2 [Gossypium hirsutum NoSp] ES822520 weakly similar to UniRef100_Q9LIE8 Cluster: Similarity to cell wall-plasma membrane linker protein; n=1; Arabidopsis thaliana|Rep: Similarity to cell wall-plasma membrane linker protein - Arabidopsis thaliana (Mouse-ear cress), partial (11%)			328	PPVK	4	4.75	141	161
3	Malvaceae	Gossypium	hirsutum	TC	ES813377 2 [Gossypium hirsutum NoSp] ES813377 weakly similar to UniRef100_Q9LIE8 Cluster: Similarity to cell wall-plasma membrane linker protein; n=1; Arabidopsis thaliana|Rep: Similarity to cell wall-plasma membrane linker protein - Arabidopsis thaliana (Mouse-ear cress), partial (8%)			369	PPVK	4	4.75	88	108
3	Asteraceae	Lactuca	sativa	TC	TC26718 1 [Lactuca sativa 3] TC26718 weakly similar to UniRef100_P93705 Cluster: Hypocotil specific; n=1; Daucus carota|Rep: Hypocotil specific - Daucus carota (Carrot), partial (32%)			428	PPVK	4	5	179	200
3	Asteraceae	Lactuca	serriola	TC	TC1776 1 [Lactuca serriola 1] TC1776 similar to UniRef100_P93705 Cluster: Hypocotil specific; n=1; Daucus carota|Rep: Hypocotil specific - Daucus carota (Carrot), partial (30%)			271	PPVK	4	3.75	89	104
3	Asteraceae	Lactuca	serriola	TC	DW114834 2 [Lactuca serriola 1] DW114834 similar to UniRef100_P93705 Cluster: Hypocotil specific; n=1; Daucus carota|Rep: Hypocotil specific - Daucus carota (Carrot), partial (17%)			276	PPVK	4	3.75	88	103
3	Brassicaceae	Arabidopsis	thaliana	TC	NP10424550 1 [Arabidopsis thaliana 14] NP10424550 GB|AK229236.1|BAF01102.1 putative proline-rich protein	AT1G28290	AGP31	395	PPVK	4	19.75	79	157
3	Brassicaceae	Arabidopsis	thaliana	TC	NP10424550 1 [Arabidopsis thaliana 14] NP10424550 GB|AK229236.1|BAF01102.1 putative proline-rich protein	AT1G28290	AGP31	395	PPVK	4	6.25	79	103
3	Brassicaceae	Arabidopsis	thaliana	TC	NP10424550 1 [Arabidopsis thaliana 14] NP10424550 GB|AK229236.1|BAF01102.1 putative proline-rich protein	AT1G28290	AGP31	395	PPVK	4	12.75	107	157
3	Brassicaceae	Arabidopsis	thaliana	TC	NP1656798 3 [Arabidopsis thaliana 14] NP1656798 GB|NM_001084147.1|NP_001077616.1 pollen Ole e 1 allergen and extensin family protein;similar to pollen Ole e 1 allergen and extensin family protein [Arabidopsis thaliana] (TAIR:AT2G33790.1); similar to HyPRP1 [Gossypium hirsutum] (GB:ABG91751.1); contains InterPro domain Pollen Ole e 1 a	AT1G28290	AGP31	394	PPVK	4	6.25	80	104
3	Brassicaceae	Arabidopsis	thaliana	TC	NP1656798 3 [Arabidopsis thaliana 14] NP1656798 GB|NM_001084147.1|NP_001077616.1 pollen Ole e 1 allergen and extensin family protein;similar to pollen Ole e 1 allergen and extensin family protein [Arabidopsis thaliana] (TAIR:AT2G33790.1); similar to HyPRP1 [Gossypium hirsutum] (GB:ABG91751.1); contains InterPro domain Pollen Ole e 1 a	AT1G28290	AGP31	394	PPVK	4	14.75	108	166
3	Brassicaceae	Arabidopsis	thaliana	TC	NP1656798 3 [Arabidopsis thaliana 14] NP1656798 GB|NM_001084147.1|NP_001077616.1 pollen Ole e 1 allergen and extensin family protein;similar to pollen Ole e 1 allergen and extensin family protein [Arabidopsis thaliana] (TAIR:AT2G33790.1); similar to HyPRP1 [Gossypium hirsutum] (GB:ABG91751.1); contains InterPro domain Pollen Ole e 1 a	AT1G28290	AGP31	394	PPVK	4	20.5	80	161
3	Brassicaceae	Arabidopsis	thaliana	TC	BP562940 3 [Arabidopsis thaliana 14] BP562940 homologue to UniRef100_UPI000150568E Cluster: pollen Ole e 1 allergen and extensin family protein; n=1; Arabidopsis thaliana|Rep: pollen Ole e 1 allergen and extensin family protein - Arabidopsis thaliana, partial (62%)	AT1G28290	AGP31	206	PPVK	4	19.75	80	158
3	Brassicaceae	Arabidopsis	thaliana	TC	BP562940 3 [Arabidopsis thaliana 14] BP562940 homologue to UniRef100_UPI000150568E Cluster: pollen Ole e 1 allergen and extensin family protein; n=1; Arabidopsis thaliana|Rep: pollen Ole e 1 allergen and extensin family protein - Arabidopsis thaliana, partial (62%)	AT1G28290	AGP31	206	PPVK	4	6.25	80	104
3	Brassicaceae	Arabidopsis	thaliana	TC	BP562940 3 [Arabidopsis thaliana 14] BP562940 homologue to UniRef100_UPI000150568E Cluster: pollen Ole e 1 allergen and extensin family protein; n=1; Arabidopsis thaliana|Rep: pollen Ole e 1 allergen and extensin family protein - Arabidopsis thaliana, partial (62%)	AT1G28290	AGP31	206	PPVK	4	12.75	108	158
3	Brassicaceae	Arabidopsis	thaliana	TC	DR240254 2 [Arabidopsis thaliana 14] DR240254 homologue to UniRef100_UPI000150568E Cluster: pollen Ole e 1 allergen and extensin family protein; n=1; Arabidopsis thaliana|Rep: pollen Ole e 1 allergen and extensin family protein - Arabidopsis thaliana, partial (48%)	AT1G28290	AGP31	160	PPVK	4	18.5	78	151
3	Brassicaceae	Arabidopsis	thaliana	TC	DR240272 3 [Arabidopsis thaliana 14] DR240272 homologue to UniRef100_UPI000150568E Cluster: pollen Ole e 1 allergen and extensin family protein; n=1; Arabidopsis thaliana|Rep: pollen Ole e 1 allergen and extensin family protein - Arabidopsis thaliana, partial (35%)	AT1G28290	AGP31	111	PPVK	4	6.25	28	52
3	Brassicaceae	Arabidopsis	thaliana	TC	DR240272 3 [Arabidopsis thaliana 14] DR240272 homologue to UniRef100_UPI000150568E Cluster: pollen Ole e 1 allergen and extensin family protein; n=1; Arabidopsis thaliana|Rep: pollen Ole e 1 allergen and extensin family protein - Arabidopsis thaliana, partial (35%)	AT1G28290	AGP31	111	PPVK	4	12.25	58	106
3	Brassicaceae	Arabidopsis	thaliana	TC	DR240250 2 [Arabidopsis thaliana 14] DR240250 UniRef100_UPI000150568E Cluster: pollen Ole e 1 allergen and extensin family protein; n=1; Arabidopsis thaliana|Rep: pollen Ole e 1 allergen and extensin family protein - Arabidopsis thaliana, partial (64%)	AT1G28290	AGP31	235	PPVK	4	32.5	79	208
3	Brassicaceae	Arabidopsis	thaliana	TC	CB252938 3 [Arabidopsis thaliana 14] CB252938 similar to UniRef100_UPI000150568E Cluster: pollen Ole e 1 allergen and extensin family protein; n=1; Arabidopsis thaliana|Rep: pollen Ole e 1 allergen and extensin family protein - Arabidopsis thaliana, partial (70%)	AT1G28290	AGP31	220	PPVK	4	20.25	7	87
3	Brassicaceae	Arabidopsis	thaliana	TC	DR240254 2 [Arabidopsis thaliana 14] DR240254 homologue to UniRef100_UPI000150568E Cluster: pollen Ole e 1 allergen and extensin family protein; n=1; Arabidopsis thaliana|Rep: pollen Ole e 1 allergen and extensin family protein - Arabidopsis thaliana, partial (48%)	AT1G28290	AGP31	160	PPVK	4	6.25	78	102
3	Brassicaceae	Arabidopsis	thaliana	TC	DR240254 2 [Arabidopsis thaliana 14] DR240254 homologue to UniRef100_UPI000150568E Cluster: pollen Ole e 1 allergen and extensin family protein; n=1; Arabidopsis thaliana|Rep: pollen Ole e 1 allergen and extensin family protein - Arabidopsis thaliana, partial (48%)	AT1G28290	AGP31	160	PPVK	4	3.5	106	119
3	Brassicaceae	Arabidopsis	thaliana	TC	DR240292 1 [Arabidopsis thaliana 14] DR240292 similar to UniRef100_UPI000150568E Cluster: pollen Ole e 1 allergen and extensin family protein; n=1; Arabidopsis thaliana|Rep: pollen Ole e 1 allergen and extensin family protein - Arabidopsis thaliana, partial (46%)	AT1G28290	AGP31	161	PPVK	4	4.5	79	96
3	Brassicaceae	Arabidopsis	thaliana	TC	DR240292 1 [Arabidopsis thaliana 14] DR240292 similar to UniRef100_UPI000150568E Cluster: pollen Ole e 1 allergen and extensin family protein; n=1; Arabidopsis thaliana|Rep: pollen Ole e 1 allergen and extensin family protein - Arabidopsis thaliana, partial (46%)	AT1G28290	AGP31	161	PPVK	4	6.5	107	132
3	Brassicaceae	Arabidopsis	thaliana	TC	DR240250 2 [Arabidopsis thaliana 14] DR240250 UniRef100_UPI000150568E Cluster: pollen Ole e 1 allergen and extensin family protein; n=1; Arabidopsis thaliana|Rep: pollen Ole e 1 allergen and extensin family protein - Arabidopsis thaliana, partial (64%)	AT1G28290	AGP31	235	PPVK	4	6.25	79	103
3	Brassicaceae	Arabidopsis	thaliana	TC	DR240250 2 [Arabidopsis thaliana 14] DR240250 UniRef100_UPI000150568E Cluster: pollen Ole e 1 allergen and extensin family protein; n=1; Arabidopsis thaliana|Rep: pollen Ole e 1 allergen and extensin family protein - Arabidopsis thaliana, partial (64%)	AT1G28290	AGP31	235	PPVK	4	26.25	107	211
3	Solanaceae	Nicotiana	tabacum	TC	TC40573 3 [Nicotiana tabacum 5] TC40573 homologue to UniRef100_Q07894 Cluster: Proline-rich protein; n=1; Nicotiana alata|Rep: Proline-rich protein - Nicotiana alata (Winged tobacco) (Persian tobacco), complete			300	PPVK	4	3.25	78	90
3	Brassicaceae	Arabidopsis	thaliana	TC	AV551623 3 [Arabidopsis thaliana 14] AV551623 homologue to UniRef100_UPI000150568E Cluster: pollen Ole e 1 allergen and extensin family protein; n=1; Arabidopsis thaliana|Rep: pollen Ole e 1 allergen and extensin family protein - Arabidopsis thaliana, partial (50%)	AT1G28290	AGP31	158	PPVK	4	12.75	59	112
3	Brassicaceae	Arabidopsis	thaliana	TC	AV551131 3 [Arabidopsis thaliana 14] AV551131 similar to UniRef100_UPI000150568E Cluster: pollen Ole e 1 allergen and extensin family protein; n=1; Arabidopsis thaliana|Rep: pollen Ole e 1 allergen and extensin family protein - Arabidopsis thaliana, partial (33%)	AT1G28290	AGP31	104	PPVK	4	18.25	5	77
3	Brassicaceae	Arabidopsis	thaliana	TC	AV442464 3 [Arabidopsis thaliana 14] AV442464 similar to UniRef100_UPI000150568E Cluster: pollen Ole e 1 allergen and extensin family protein; n=1; Arabidopsis thaliana|Rep: pollen Ole e 1 allergen and extensin family protein - Arabidopsis thaliana, partial (37%)	AT1G28290	AGP31	116	PPVK	4	13.5	4	57
3	Brassicaceae	Arabidopsis	thaliana	TC	AV543170 2 [Arabidopsis thaliana 14] AV543170 homologue to UniRef100_UPI000150568E Cluster: pollen Ole e 1 allergen and extensin family protein; n=1; Arabidopsis thaliana|Rep: pollen Ole e 1 allergen and extensin family protein - Arabidopsis thaliana, partial (55%)	AT1G28290	AGP31	192	PPVK	4	6.25	65	89
3	Brassicaceae	Arabidopsis	thaliana	TC	AV543170 2 [Arabidopsis thaliana 14] AV543170 homologue to UniRef100_UPI000150568E Cluster: pollen Ole e 1 allergen and extensin family protein; n=1; Arabidopsis thaliana|Rep: pollen Ole e 1 allergen and extensin family protein - Arabidopsis thaliana, partial (55%)	AT1G28290	AGP31	192	PPVK	4	24.5	93	190
3	Brassicaceae	Arabidopsis	thaliana	TC	AV543170 2 [Arabidopsis thaliana 14] AV543170 homologue to UniRef100_UPI000150568E Cluster: pollen Ole e 1 allergen and extensin family protein; n=1; Arabidopsis thaliana|Rep: pollen Ole e 1 allergen and extensin family protein - Arabidopsis thaliana, partial (55%)	AT1G28290	AGP31	192	PPVK	4	26.25	65	169
3	Brassicaceae	Arabidopsis	thaliana	TC	AV553534 2 [Arabidopsis thaliana 14] AV553534 homologue to UniRef100_UPI000150568E Cluster: pollen Ole e 1 allergen and extensin family protein; n=1; Arabidopsis thaliana|Rep: pollen Ole e 1 allergen and extensin family protein - Arabidopsis thaliana, partial (40%)	AT1G28290	AGP31	141	PPVK	4	11.5	82	127
3	Brassicaceae	Arabidopsis	thaliana	TC	AV550654 2 [Arabidopsis thaliana 14] AV550654 homologue to UniRef100_UPI000150568E Cluster: pollen Ole e 1 allergen and extensin family protein; n=1; Arabidopsis thaliana|Rep: pollen Ole e 1 allergen and extensin family protein - Arabidopsis thaliana, partial (48%)	AT1G28290	AGP31	157	PPVK	4	12.75	75	125
3	Brassicaceae	Arabidopsis	thaliana	TC	AV551533 3 [Arabidopsis thaliana 14] AV551533 homologue to UniRef100_UPI000150568E Cluster: pollen Ole e 1 allergen and extensin family protein; n=1; Arabidopsis thaliana|Rep: pollen Ole e 1 allergen and extensin family protein - Arabidopsis thaliana, partial (32%)	AT1G28290	AGP31	101	PPVK	4	6.25	10	34
3	Brassicaceae	Arabidopsis	thaliana	TC	AV551533 3 [Arabidopsis thaliana 14] AV551533 homologue to UniRef100_UPI000150568E Cluster: pollen Ole e 1 allergen and extensin family protein; n=1; Arabidopsis thaliana|Rep: pollen Ole e 1 allergen and extensin family protein - Arabidopsis thaliana, partial (32%)	AT1G28290	AGP31	101	PPVK	4	6.5	38	63
3	Brassicaceae	Arabidopsis	thaliana	TC	AV551533 3 [Arabidopsis thaliana 14] AV551533 homologue to UniRef100_UPI000150568E Cluster: pollen Ole e 1 allergen and extensin family protein; n=1; Arabidopsis thaliana|Rep: pollen Ole e 1 allergen and extensin family protein - Arabidopsis thaliana, partial (32%)	AT1G28290	AGP31	101	PPVK	4	6	77	100
3	Brassicaceae	Arabidopsis	thaliana	TC	AV551533 3 [Arabidopsis thaliana 14] AV551533 homologue to UniRef100_UPI000150568E Cluster: pollen Ole e 1 allergen and extensin family protein; n=1; Arabidopsis thaliana|Rep: pollen Ole e 1 allergen and extensin family protein - Arabidopsis thaliana, partial (32%)	AT1G28290	AGP31	101	PPVK	4	19.25	10	86
3	Brassicaceae	Arabidopsis	thaliana	TC	BE523662 2 [Arabidopsis thaliana 14] BE523662 homologue to UniRef100_UPI000150568E Cluster: pollen Ole e 1 allergen and extensin family protein; n=1; Arabidopsis thaliana|Rep: pollen Ole e 1 allergen and extensin family protein - Arabidopsis thaliana, partial (48%)	AT1G28290	AGP31	153	PPVK	4	19.75	65	143
3	Brassicaceae	Arabidopsis	thaliana	TC	BE523662 2 [Arabidopsis thaliana 14] BE523662 homologue to UniRef100_UPI000150568E Cluster: pollen Ole e 1 allergen and extensin family protein; n=1; Arabidopsis thaliana|Rep: pollen Ole e 1 allergen and extensin family protein - Arabidopsis thaliana, partial (48%)	AT1G28290	AGP31	153	PPVK	4	6.25	65	89
3	Brassicaceae	Arabidopsis	thaliana	TC	BE523662 2 [Arabidopsis thaliana 14] BE523662 homologue to UniRef100_UPI000150568E Cluster: pollen Ole e 1 allergen and extensin family protein; n=1; Arabidopsis thaliana|Rep: pollen Ole e 1 allergen and extensin family protein - Arabidopsis thaliana, partial (48%)	AT1G28290	AGP31	153	PPVK	4	12.75	93	143
3	Brassicaceae	Arabidopsis	thaliana	TC	DR240280 2 [Arabidopsis thaliana 14] DR240280 homologue to UniRef100_UPI000150568E Cluster: pollen Ole e 1 allergen and extensin family protein; n=1; Arabidopsis thaliana|Rep: pollen Ole e 1 allergen and extensin family protein - Arabidopsis thaliana, partial (35%)	AT1G28290	AGP31	120	PPVK	4	6.25	80	104
3	Brassicaceae	Arabidopsis	thaliana	TC	Z29727 3 [Arabidopsis thaliana 14] Z29727 similar to UniRef100_UPI000150568E Cluster: pollen Ole e 1 allergen and extensin family protein; n=1; Arabidopsis thaliana|Rep: pollen Ole e 1 allergen and extensin family protein - Arabidopsis thaliana, partial (29%)	AT1G28290	AGP31	101	PPVK	4	17	4	71
3	Brassicaceae	Arabidopsis	thaliana	TC	DR240269 3 [Arabidopsis thaliana 14] DR240269 UniRef100_UPI000150568E Cluster: pollen Ole e 1 allergen and extensin family protein; n=1; Arabidopsis thaliana|Rep: pollen Ole e 1 allergen and extensin family protein - Arabidopsis thaliana, partial (42%)	AT1G28290	AGP31	140	PPVK	4	6.25	73	97
3	Brassicaceae	Arabidopsis	thaliana	TC	DR240269 3 [Arabidopsis thaliana 14] DR240269 UniRef100_UPI000150568E Cluster: pollen Ole e 1 allergen and extensin family protein; n=1; Arabidopsis thaliana|Rep: pollen Ole e 1 allergen and extensin family protein - Arabidopsis thaliana, partial (42%)	AT1G28290	AGP31	140	PPVK	4	6.5	101	126
3	Orobanchaceae	Triphysaria	pusilla	TC	TC12915 2 [Triphysaria pusilla NoSp] TC12915 weakly similar to UniRef100_Q6QNA3 Cluster: Proline-rich protein 1; n=1; Capsicum annuum|Rep: Proline-rich protein 1 - Capsicum annuum (Bell pepper), partial (48%)			149	PPVK	4	9.25	0	36
3	Orobanchaceae	Triphysaria	versicolor	TC	TC6223 2 [Triphysaria versicolor 2] TC6223 weakly similar to UniRef100_Q6QNA3 Cluster: Proline-rich protein 1; n=1; Capsicum annuum|Rep: Proline-rich protein 1 - Capsicum annuum (Bell pepper), partial (48%)			149	PPVK	4	9.25	0	36
3	Brassicaceae	Arabidopsis	thaliana	TC	DR240233 1 [Arabidopsis thaliana 14] DR240233 UniRef100_UPI000150568E Cluster: pollen Ole e 1 allergen and extensin family protein; n=1; Arabidopsis thaliana|Rep: pollen Ole e 1 allergen and extensin family protein - Arabidopsis thaliana, partial (31%)	AT1G28290	AGP31	122	PPVK	4	6.25	80	104
3	Brassicaceae	Arabidopsis	thaliana	TC	DR240233 2 [Arabidopsis thaliana 14] DR240233 UniRef100_UPI000150568E Cluster: pollen Ole e 1 allergen and extensin family protein; n=1; Arabidopsis thaliana|Rep: pollen Ole e 1 allergen and extensin family protein - Arabidopsis thaliana, partial (31%)			122	PPVK	4	3.75	106	121
3	Brassicaceae	Arabidopsis	thaliana	TC	DR240221 3 [Arabidopsis thaliana 14] DR240221 homologue to UniRef100_UPI000150568E Cluster: pollen Ole e 1 allergen and extensin family protein; n=1; Arabidopsis thaliana|Rep: pollen Ole e 1 allergen and extensin family protein - Arabidopsis thaliana, partial (37%)	AT1G28290	AGP31	123	PPVK	4	6.25	79	103
3	Brassicaceae	Arabidopsis	thaliana	TC	DR240257 3 [Arabidopsis thaliana 14] DR240257 homologue to UniRef100_UPI000150568E Cluster: pollen Ole e 1 allergen and extensin family protein; n=1; Arabidopsis thaliana|Rep: pollen Ole e 1 allergen and extensin family protein - Arabidopsis thaliana, partial (38%)	AT1G28290	AGP31	129	PPVK	4	11.25	79	123
3	Brassicaceae	Arabidopsis	thaliana	TC	DR242298 2 [Arabidopsis thaliana 14] DR242298 similar to UniRef100_UPI000150568E Cluster: pollen Ole e 1 allergen and extensin family protein; n=1; Arabidopsis thaliana|Rep: pollen Ole e 1 allergen and extensin family protein - Arabidopsis thaliana, partial (57%)	AT1G28290	AGP31	221	PPVK	4	6.5	15	40
3	Brassicaceae	Arabidopsis	thaliana	TC	DR240245 1 [Arabidopsis thaliana 14] DR240245 homologue to UniRef100_UPI000150568E Cluster: pollen Ole e 1 allergen and extensin family protein; n=1; Arabidopsis thaliana|Rep: pollen Ole e 1 allergen and extensin family protein - Arabidopsis thaliana, partial (42%)	AT1G28290	AGP31	137	PPVK	4	5	108	127
3	Brassicaceae	Arabidopsis	thaliana	TC	DR240245 1 [Arabidopsis thaliana 14] DR240245 homologue to UniRef100_UPI000150568E Cluster: pollen Ole e 1 allergen and extensin family protein; n=1; Arabidopsis thaliana|Rep: pollen Ole e 1 allergen and extensin family protein - Arabidopsis thaliana, partial (42%)	AT1G28290	AGP31	137	PPVK	4	6.25	74	98
3	Brassicaceae	Arabidopsis	thaliana	TC	DR240258 2 [Arabidopsis thaliana 14] DR240258 homologue to UniRef100_UPI000150568E Cluster: pollen Ole e 1 allergen and extensin family protein; n=1; Arabidopsis thaliana|Rep: pollen Ole e 1 allergen and extensin family protein - Arabidopsis thaliana, partial (39%)	AT1G28290	AGP31	131	PPVK	4	6.25	79	103
3	Brassicaceae	Arabidopsis	thaliana	TC	EH984824 3 [Arabidopsis thaliana 14] EH984824 homologue to UniRef100_UPI000150568E Cluster: pollen Ole e 1 allergen and extensin family protein; n=1; Arabidopsis thaliana|Rep: pollen Ole e 1 allergen and extensin family protein - Arabidopsis thaliana, partial (16%)	AT1G28290	AGP31	50	PPVK	4	12.5	0	49
3	Brassicaceae	Arabidopsis	thaliana	TC	ES027070 2 [Arabidopsis thaliana 14] ES027070 homologue to UniRef100_UPI000150568E Cluster: pollen Ole e 1 allergen and extensin family protein; n=1; Arabidopsis thaliana|Rep: pollen Ole e 1 allergen and extensin family protein - Arabidopsis thaliana, partial (16%)	AT1G28290	AGP31	50	PPVK	4	3.25	0	12
3	Brassicaceae	Arabidopsis	thaliana	TC	EL241470 2 [Arabidopsis thaliana 14] EL241470 homologue to UniRef100_UPI000150568E Cluster: pollen Ole e 1 allergen and extensin family protein; n=1; Arabidopsis thaliana|Rep: pollen Ole e 1 allergen and extensin family protein - Arabidopsis thaliana, partial (16%)			49	PPVK	4	4	5	20
3	Brassicaceae	Arabidopsis	thaliana	TC	EL246318 3 [Arabidopsis thaliana 14] EL246318 homologue to UniRef100_UPI000150568E Cluster: pollen Ole e 1 allergen and extensin family protein; n=1; Arabidopsis thaliana|Rep: pollen Ole e 1 allergen and extensin family protein - Arabidopsis thaliana, partial (14%)	AT1G28290	AGP31	51	PPVK	4	4.5	22	39
3	Brassicaceae	Arabidopsis	thaliana	TC	ES145320 2 [Arabidopsis thaliana 14] ES145320 homologue to UniRef100_UPI000150568E Cluster: pollen Ole e 1 allergen and extensin family protein; n=1; Arabidopsis thaliana|Rep: pollen Ole e 1 allergen and extensin family protein - Arabidopsis thaliana, partial (12%)	AT1G28290	AGP31	48	PPVK	4	3.75	27	41
3	Brassicaceae	Arabidopsis	thaliana	TC	ES145320 3 [Arabidopsis thaliana 14] ES145320 homologue to UniRef100_UPI000150568E Cluster: pollen Ole e 1 allergen and extensin family protein; n=1; Arabidopsis thaliana|Rep: pollen Ole e 1 allergen and extensin family protein - Arabidopsis thaliana, partial (12%)	AT1G28290	AGP31	47	PPVK	4	4	0	15
3	Brassicaceae	Brassica	napus	TC	TC64975 3 [Brassica napus 3-1] TC64975 similar to UniRef100_UPI000150568E Cluster: pollen Ole e 1 allergen and extensin family protein; n=1; Arabidopsis thaliana|Rep: pollen Ole e 1 allergen and extensin family protein - Arabidopsis thaliana, partial (87%)			351	PPVK	4	18.25	70	142
3	Brassicaceae	Brassica	napus	TC	TC71449 1 [Brassica napus 3-1] TC71449 similar to UniRef100_UPI000150568E Cluster: pollen Ole e 1 allergen and extensin family protein; n=1; Arabidopsis thaliana|Rep: pollen Ole e 1 allergen and extensin family protein - Arabidopsis thaliana, complete			445	PPVK	4	35.5	69	210
3	Brassicaceae	Brassica	napus	TC	TC72677 1 [Brassica napus 3-1] TC72677 similar to UniRef100_UPI000150568E Cluster: pollen Ole e 1 allergen and extensin family protein; n=1; Arabidopsis thaliana|Rep: pollen Ole e 1 allergen and extensin family protein - Arabidopsis thaliana, partial (67%)			246	PPVK	4	24.25	76	172
3	Brassicaceae	Brassica	napus	TC	TC86196 2 [Brassica napus 3-1] TC86196 similar to UniRef100_UPI000150568E Cluster: pollen Ole e 1 allergen and extensin family protein; n=1; Arabidopsis thaliana|Rep: pollen Ole e 1 allergen and extensin family protein - Arabidopsis thaliana, complete			360	PPVK	4	14.25	124	180
3	Brassicaceae	Brassica	napus	TC	TC90718 3 [Brassica napus 3-1] TC90718 similar to UniRef100_UPI000150568E Cluster: pollen Ole e 1 allergen and extensin family protein; n=1; Arabidopsis thaliana|Rep: pollen Ole e 1 allergen and extensin family protein - Arabidopsis thaliana, partial (94%)			415	PPVK	4	18.25	101	173
3	Brassicaceae	Brassica	napus	TC	CX281741 1 [Brassica napus 3-1] CX281741 similar to UniRef100_UPI000150568E Cluster: pollen Ole e 1 allergen and extensin family protein; n=1; Arabidopsis thaliana|Rep: pollen Ole e 1 allergen and extensin family protein - Arabidopsis thaliana, partial (50%)			214	PPVK	4	7.25	126	154
3	Brassicaceae	Brassica	napus	TC	EV125245 3 [Brassica napus 3-1] EV125245 similar to UniRef100_UPI000150568E Cluster: pollen Ole e 1 allergen and extensin family protein; n=1; Arabidopsis thaliana|Rep: pollen Ole e 1 allergen and extensin family protein - Arabidopsis thaliana, partial (74%)			236	PPVK	4	22.5	90	179
3	Solanaceae	Capsicum	annuum	TC	CA516290 1 [Capsicum annuum 4] CA516290 similar to UniRef100_Q41122 Cluster: Proline-rich protein precursor; n=1; Phaseolus vulgaris|Rep: Proline-rich protein precursor - Phaseolus vulgaris (Kidney bean) (French bean), partial (18%)			115	PPVK	4	3.75	61	77
3	Papaveraceae	Eschscholzia	californica	TA	CD478815 1 [Eschscholzia californica release] CD478815			138	PPVK	4	4.25	64	80
3	Asteraceae	Lactuca	saligna	TA	DW061873 2 [Lactuca saligna release] DW061873			261	PPVK	4	4	24	41
3	Brassicaceae	Thellungiella	salsuginea	TA	DN778269 1 [Thellungiella salsuginea release] DN778269 F3H9.6 protein [Arabidopsis thaliana (Mouse-ear cress)]			192	PPVK	4	15.75	77	139
3	Brassicaceae	Thlaspi	caerulescens	TA	DN923948 2 [Thlaspi caerulescens release] DN923948			167	PPVK	4	6.5	74	99
3	Brassicaceae	Thlaspi	caerulescens	TA	DN923948 2 [Thlaspi caerulescens release] DN923948			167	PPVK	4	8.75	52	86
3	Brassicaceae	Brassica	oleracea	TA	TA3066_3712 3 [Brassica oleracea release] TA3066_3712			211	PPVK	4	33.75	76	210
3	Brassicaceae	Brassica	oleracea	TA	AM057972 1 [Brassica oleracea release] AM057972 F3H9.6 protein [Arabidopsis thaliana (Mouse-ear cress)]			122	PPVK	4	6.5	92	117
3	Brassicaceae	Brassica	rapa	TA	TA2657_3711 1 [Brassica rapa release] TA2657_3711			233	PPVK	4	3	201	212
3	Brassicaceae	Brassica	rapa	TA	TA2657_3711 1 [Brassica rapa release] TA2657_3711			233	PPVK	4	24.25	75	171
3	Brassicaceae	Brassica	rapa	TA	TA3783_3711 1 [Brassica rapa release] TA3783_3711 F3H9.6 protein [Arabidopsis thaliana (Mouse-ear cress)]			225	PPVK	4	4.5	72	89
3	Brassicaceae	Brassica	rapa	TA	TA3783_3711 1 [Brassica rapa release] TA3783_3711 F3H9.6 protein [Arabidopsis thaliana (Mouse-ear cress)]			225	PPVK	4	11.5	96	141
3	Brassicaceae	Brassica	rapa	TA	CX265805 1 [Brassica rapa release] CX265805 F3H9.6 protein [Arabidopsis thaliana (Mouse-ear cress)]			225	PPVK	4	3	169	180
3	Brassicaceae	Brassica	rapa	TA	CX265805 1 [Brassica rapa release] CX265805 F3H9.6 protein [Arabidopsis thaliana (Mouse-ear cress)]			225	PPVK	4	21.75	53	139
3	Brassicaceae	Brassica	rapa	TA	CX272325 2 [Brassica rapa release] CX272325			214	PPVK	4	17	69	136
3	Brassicaceae	Brassica	rapa	TA	CX272325 2 [Brassica rapa release] CX272325			214	PPVK	4	5	142	161
3	Asteraceae	Carthamus	tinctorius	TA	EL380689 1 [Carthamus tinctorius release] EL380689			252	PPVK	4	4.75	214	234
3	Apiaceae	Daucus	carota	NR	gi|11322245|emb|CAC16734.1| arabinogalactan protein [Daucus carota]			242	PPVK	4	4.5	77	94
3	Fabaceae	Glycine	max	NR	gi|255646492|gb|ACU23724.1| unknown [Glycine max]			293	PPVK	4	3.75	132	148
3	Brassicaceae	Arabidopsis	thaliana	NR	gi|15217879|ref|NP_174150.1| AGP31 (arabinogalactan-protein 31) [Arabidopsis thaliana] gi|9795608|gb|AAF98426.1|AC021044_5 Unknown protein [Arabidopsis thaliana] gi|119360033|gb|ABL66745.1| At1g28290 [Arabidopsis thaliana]	AT1G28290	AGP31	359	PPVK	4	6.25	70	94
3	Brassicaceae	Arabidopsis	thaliana	NR	gi|15217879|ref|NP_174150.1| AGP31 (arabinogalactan-protein 31) [Arabidopsis thaliana] gi|9795608|gb|AAF98426.1|AC021044_5 Unknown protein [Arabidopsis thaliana] gi|119360033|gb|ABL66745.1| At1g28290 [Arabidopsis thaliana]	AT1G28290	AGP31	359	PPVK	4	24.5	98	195
3	Brassicaceae	Arabidopsis	thaliana	NR	gi|15217879|ref|NP_174150.1| AGP31 (arabinogalactan-protein 31) [Arabidopsis thaliana] gi|9795608|gb|AAF98426.1|AC021044_5 Unknown protein [Arabidopsis thaliana] gi|119360033|gb|ABL66745.1| At1g28290 [Arabidopsis thaliana]	AT1G28290	AGP31	359	PPVK	4	26.25	70	174
3	Brassicaceae	Arabidopsis	thaliana	NR	gi|110738350|dbj|BAF01102.1| putative proline-rich protein [Arabidopsis thaliana]	AT1G28290	AGP31	315	PPVK	4	19.75	70	148
3	Brassicaceae	Arabidopsis	thaliana	NR	gi|110738350|dbj|BAF01102.1| putative proline-rich protein [Arabidopsis thaliana]	AT1G28290	AGP31	315	PPVK	4	6.25	70	94
3	Brassicaceae	Arabidopsis	thaliana	NR	gi|110738350|dbj|BAF01102.1| putative proline-rich protein [Arabidopsis thaliana]	AT1G28290	AGP31	315	PPVK	4	12.75	98	148
3	Brassicaceae	Arabidopsis	thaliana	NR	gi|145324054|ref|NP_001077616.1| AGP31 (arabinogalactan-protein 31) [Arabidopsis thaliana]	AT1G28290	AGP31	315	PPVK	4	6.25	70	94
3	Brassicaceae	Arabidopsis	thaliana	NR	gi|145324054|ref|NP_001077616.1| AGP31 (arabinogalactan-protein 31) [Arabidopsis thaliana]	AT1G28290	AGP31	315	PPVK	4	14.75	98	156
3	Brassicaceae	Arabidopsis	thaliana	NR	gi|145324054|ref|NP_001077616.1| AGP31 (arabinogalactan-protein 31) [Arabidopsis thaliana]	AT1G28290	AGP31	315	PPVK	4	20.5	70	151
3	Fabaceae	Glycine	max	TC	TC295725 2 [Glycine max 14] TC295725 similar to UniRef100_P13993 Cluster: Repetitive proline-rich cell wall protein 2 precursor; n=1; Glycine max|Rep: Repetitive proline-rich cell wall protein 2 precursor - Glycine max (Soybean), partial (73%)			250	PVEKP	5	26.2	35	165
3	Fabaceae	Glycine	max	TC	TC338823 1 [Glycine max 14] TC338823 UniRef100_O24443 Cluster: Cell wall type 2 proline rich protein PvPRP2-37; n=1; Phaseolus vulgaris|Rep: Cell wall type 2 proline rich protein PvPRP2-37 - Phaseolus vulgaris (Kidney bean) (French bean), partial (49%)			207	PVEKP	5	7.8	0	38
3	Fabaceae	Glycine	max	TC	BI974755 2 [Glycine max 14] BI974755 homologue to UniRef100_P13993 Cluster: Repetitive proline-rich cell wall protein 2 precursor; n=1; Glycine max|Rep: Repetitive proline-rich cell wall protein 2 precursor - Glycine max (Soybean), partial (61%)			141	PVEKP	5	28	0	139
3	Fabaceae	Medicago	truncatula	TC	TC114982 3 [Medicago truncatula 9] TC114982 UniRef100_Q40376 Cluster: Nodulin precursor; n=1; Medicago truncatula|Rep: Nodulin precursor - Medicago truncatula (Barrel medic), complete			639	PVEKP	5	92	26	487
3	Fabaceae	Medicago	truncatula	TC	TC114982 3 [Medicago truncatula 9] TC114982 UniRef100_Q40376 Cluster: Nodulin precursor; n=1; Medicago truncatula|Rep: Nodulin precursor - Medicago truncatula (Barrel medic), complete			639	PVEKP	5	8.6	497	539
3	Fabaceae	Medicago	truncatula	TC	TC124554 1 [Medicago truncatula 9] TC124554 homologue to UniRef100_Q40376 Cluster: Nodulin precursor; n=1; Medicago truncatula|Rep: Nodulin precursor - Medicago truncatula (Barrel medic), partial (52%)			307	PVEKP	5	7	248	282
3	Fabaceae	Medicago	truncatula	TC	TC131355 1 [Medicago truncatula 9] TC131355 similar to UniRef100_Q40376 Cluster: Nodulin precursor; n=1; Medicago truncatula|Rep: Nodulin precursor - Medicago truncatula (Barrel medic), partial (53%)			295	PVEKP	5	10	107	156
3	Fabaceae	Medicago	truncatula	TC	TC119668 1 [Medicago truncatula 9] TC119668 similar to UniRef100_Q40376 Cluster: Nodulin precursor; n=1; Medicago truncatula|Rep: Nodulin precursor - Medicago truncatula (Barrel medic), partial (66%)			370	PVEKP	5	3	149	163
3	Fabaceae	Medicago	truncatula	TC	TC119668 1 [Medicago truncatula 9] TC119668 similar to UniRef100_Q40376 Cluster: Nodulin precursor; n=1; Medicago truncatula|Rep: Nodulin precursor - Medicago truncatula (Barrel medic), partial (66%)			370	PVEKP	5	11	169	223
3	Fabaceae	Medicago	truncatula	TC	TC119668 1 [Medicago truncatula 9] TC119668 similar to UniRef100_Q40376 Cluster: Nodulin precursor; n=1; Medicago truncatula|Rep: Nodulin precursor - Medicago truncatula (Barrel medic), partial (66%)			370	PVEKP	5	2.6	229	241
3	Fabaceae	Medicago	truncatula	TC	TC119668 1 [Medicago truncatula 9] TC119668 similar to UniRef100_Q40376 Cluster: Nodulin precursor; n=1; Medicago truncatula|Rep: Nodulin precursor - Medicago truncatula (Barrel medic), partial (66%)			370	PVEKP	5	3	249	263
3	Fabaceae	Medicago	truncatula	TC	TC119668 1 [Medicago truncatula 9] TC119668 similar to UniRef100_Q40376 Cluster: Nodulin precursor; n=1; Medicago truncatula|Rep: Nodulin precursor - Medicago truncatula (Barrel medic), partial (66%)			370	PVEKP	5	2.6	279	291
3	Fabaceae	Medicago	truncatula	TC	TC119668 1 [Medicago truncatula 9] TC119668 similar to UniRef100_Q40376 Cluster: Nodulin precursor; n=1; Medicago truncatula|Rep: Nodulin precursor - Medicago truncatula (Barrel medic), partial (66%)			370	PVEKP	5	3	299	313
3	Fabaceae	Medicago	truncatula	TC	TC119668 1 [Medicago truncatula 9] TC119668 similar to UniRef100_Q40376 Cluster: Nodulin precursor; n=1; Medicago truncatula|Rep: Nodulin precursor - Medicago truncatula (Barrel medic), partial (66%)			370	PVEKP	5	3.2	326	341
3	Fabaceae	Medicago	truncatula	TC	TC119668 1 [Medicago truncatula 9] TC119668 similar to UniRef100_Q40376 Cluster: Nodulin precursor; n=1; Medicago truncatula|Rep: Nodulin precursor - Medicago truncatula (Barrel medic), partial (66%)			370	PVEKP	5	3.4	346	362
3	Fabaceae	Medicago	truncatula	TC	TC121140 1 [Medicago truncatula 9] TC121140 similar to UniRef100_Q40375 Cluster: Repetitive proline-rich cell wall protein 2 precursor; n=1; Medicago truncatula|Rep: Repetitive proline-rich cell wall protein 2 precursor - Medicago truncatula (Barrel medic), partial (66%)			255	PVEKP	5	3.6	27	44
3	Fabaceae	Medicago	truncatula	TC	TC124554 3 [Medicago truncatula 9] TC124554 homologue to UniRef100_Q40376 Cluster: Nodulin precursor; n=1; Medicago truncatula|Rep: Nodulin precursor - Medicago truncatula (Barrel medic), partial (52%)			307	PVEKP	5	15.8	160	238
3	Fabaceae	Medicago	truncatula	TC	TC124691 1 [Medicago truncatula 9] TC124691 similar to UniRef100_Q40376 Cluster: Nodulin precursor; n=1; Medicago truncatula|Rep: Nodulin precursor - Medicago truncatula (Barrel medic), partial (21%)			196	PVEKP	5	11.8	52	110
3	Fabaceae	Medicago	truncatula	TC	TC125828 1 [Medicago truncatula 9] TC125828 similar to UniRef100_Q40375 Cluster: Repetitive proline-rich cell wall protein 2 precursor; n=1; Medicago truncatula|Rep: Repetitive proline-rich cell wall protein 2 precursor - Medicago truncatula (Barrel medic), partial (61%)			345	PVEKP	5	32.6	16	178
3	Fabaceae	Medicago	truncatula	TC	TC131355 2 [Medicago truncatula 9] TC131355 similar to UniRef100_Q40376 Cluster: Nodulin precursor; n=1; Medicago truncatula|Rep: Nodulin precursor - Medicago truncatula (Barrel medic), partial (53%)			295	PVEKP	5	24.2	157	277
3	Fabaceae	Medicago	truncatula	TC	TC131355 3 [Medicago truncatula 9] TC131355 similar to UniRef100_Q40376 Cluster: Nodulin precursor; n=1; Medicago truncatula|Rep: Nodulin precursor - Medicago truncatula (Barrel medic), partial (53%)			295	PVEKP	5	12	46	105
3	Fabaceae	Medicago	truncatula	TC	TC135382 2 [Medicago truncatula 9] TC135382 similar to UniRef100_Q40375 Cluster: Repetitive proline-rich cell wall protein 2 precursor; n=1; Medicago truncatula|Rep: Repetitive proline-rich cell wall protein 2 precursor - Medicago truncatula (Barrel medic), partial (42%)			199	PVEKP	5	31	2	156
3	Fabaceae	Medicago	truncatula	TC	TC135966 1 [Medicago truncatula 9] TC135966 homologue to UniRef100_Q40376 Cluster: Nodulin precursor; n=1; Medicago truncatula|Rep: Nodulin precursor - Medicago truncatula (Barrel medic), partial (42%)			237	PVEKP	5	44	6	225
3	Fabaceae	Medicago	truncatula	TC	TC137516 1 [Medicago truncatula 9] TC137516 homologue to UniRef100_Q40376 Cluster: Nodulin precursor; n=1; Medicago truncatula|Rep: Nodulin precursor - Medicago truncatula (Barrel medic), partial (92%)			716	PVEKP	5	8	81	120
3	Fabaceae	Medicago	truncatula	TC	TC137516 1 [Medicago truncatula 9] TC137516 homologue to UniRef100_Q40376 Cluster: Nodulin precursor; n=1; Medicago truncatula|Rep: Nodulin precursor - Medicago truncatula (Barrel medic), partial (92%)			716	PVEKP	5	65	332	656
3	Fabaceae	Medicago	truncatula	TC	TC137516 2 [Medicago truncatula 9] TC137516 homologue to UniRef100_Q40376 Cluster: Nodulin precursor; n=1; Medicago truncatula|Rep: Nodulin precursor - Medicago truncatula (Barrel medic), partial (92%)			716	PVEKP	5	11.8	121	179
3	Fabaceae	Medicago	truncatula	TC	TC137516 3 [Medicago truncatula 9] TC137516 homologue to UniRef100_Q40376 Cluster: Nodulin precursor; n=1; Medicago truncatula|Rep: Nodulin precursor - Medicago truncatula (Barrel medic), partial (92%)			716	PVEKP	5	30.4	179	330
3	Fabaceae	Medicago	truncatula	TC	AW207938 3 [Medicago truncatula 9] AW207938 similar to UniRef100_Q40358 Cluster: Repetitive proline-rich cell wall protein precursor; n=1; Medicago sativa|Rep: Repetitive proline-rich cell wall protein precursor - Medicago sativa (Alfalfa), partial (51%)			124	PVEKP	5	3	43	57
3	Fabaceae	Medicago	truncatula	TC	AW207938 3 [Medicago truncatula 9] AW207938 similar to UniRef100_Q40358 Cluster: Repetitive proline-rich cell wall protein precursor; n=1; Medicago sativa|Rep: Repetitive proline-rich cell wall protein precursor - Medicago sativa (Alfalfa), partial (51%)			124	PVEKP	5	3.6	73	90
3	Fabaceae	Medicago	truncatula	TC	CA916820 1 [Medicago truncatula 9] CA916820 similar to UniRef100_Q40376 Cluster: Nodulin precursor; n=1; Medicago truncatula|Rep: Nodulin precursor - Medicago truncatula (Barrel medic), partial (44%)			256	PVEKP	5	19	161	255
3	Fabaceae	Medicago	truncatula	TC	CA917140 1 [Medicago truncatula 9] CA917140 similar to UniRef100_Q40376 Cluster: Nodulin precursor; n=1; Medicago truncatula|Rep: Nodulin precursor - Medicago truncatula (Barrel medic), partial (45%)			245	PVEKP	5	9.2	198	243
3	Fabaceae	Medicago	truncatula	TC	CA917140 3 [Medicago truncatula 9] CA917140 similar to UniRef100_Q40376 Cluster: Nodulin precursor; n=1; Medicago truncatula|Rep: Nodulin precursor - Medicago truncatula (Barrel medic), partial (45%)			244	PVEKP	5	26.6	61	193
3	Fabaceae	Medicago	truncatula	TC	CA917274 1 [Medicago truncatula 9] CA917274 homologue to UniRef100_Q40376 Cluster: Nodulin precursor; n=1; Medicago truncatula|Rep: Nodulin precursor - Medicago truncatula (Barrel medic), partial (28%)			240	PVEKP	5	21.4	49	155
3	Fabaceae	Medicago	truncatula	TC	BI309559 3 [Medicago truncatula 9] BI309559 homologue to UniRef100_Q40376 Cluster: Nodulin precursor; n=1; Medicago truncatula|Rep: Nodulin precursor - Medicago truncatula (Barrel medic), partial (39%)			214	PVEKP	5	37.4	26	213
3	Fabaceae	Medicago	truncatula	TC	BI309622 2 [Medicago truncatula 9] BI309622 homologue to UniRef100_Q40376 Cluster: Nodulin precursor; n=1; Medicago truncatula|Rep: Nodulin precursor - Medicago truncatula (Barrel medic), partial (47%)			268	PVEKP	5	34.8	94	267
3	Fabaceae	Medicago	truncatula	TC	CA916820 1 [Medicago truncatula 9] CA916820 similar to UniRef100_Q40376 Cluster: Nodulin precursor; n=1; Medicago truncatula|Rep: Nodulin precursor - Medicago truncatula (Barrel medic), partial (44%)			256	PVEKP	5	3	131	145
3	Fabaceae	Medicago	truncatula	TC	BI309103 2 [Medicago truncatula 9] BI309103 similar to UniRef100_Q40376 Cluster: Nodulin precursor; n=1; Medicago truncatula|Rep: Nodulin precursor - Medicago truncatula (Barrel medic), partial (38%)			221	PVEKP	5	13	51	115
3	Fabaceae	Medicago	truncatula	TC	BI309103 2 [Medicago truncatula 9] BI309103 similar to UniRef100_Q40376 Cluster: Nodulin precursor; n=1; Medicago truncatula|Rep: Nodulin precursor - Medicago truncatula (Barrel medic), partial (38%)			221	PVEKP	5	16.8	80	163
3	Fabaceae	Medicago	truncatula	TC	BI309103 2 [Medicago truncatula 9] BI309103 similar to UniRef100_Q40376 Cluster: Nodulin precursor; n=1; Medicago truncatula|Rep: Nodulin precursor - Medicago truncatula (Barrel medic), partial (38%)			221	PVEKP	5	3.2	187	202
3	Fabaceae	Phaseolus	coccineus	TC	TC15211 1 [Phaseolus coccineus 1] TC15211 homologue to UniRef100_Q40375 Cluster: Repetitive proline-rich cell wall protein 2 precursor; n=1; Medicago truncatula|Rep: Repetitive proline-rich cell wall protein 2 precursor - Medicago truncatula (Barrel medic), partial (50%)			203	PVEKP	5	5.8	125	153
3	Fabaceae	Phaseolus	coccineus	TC	TC15211 3 [Phaseolus coccineus 1] TC15211 homologue to UniRef100_Q40375 Cluster: Repetitive proline-rich cell wall protein 2 precursor; n=1; Medicago truncatula|Rep: Repetitive proline-rich cell wall protein 2 precursor - Medicago truncatula (Barrel medic), partial (50%)			203	PVEKP	5	4.8	99	122
3	Fabaceae	Phaseolus	coccineus	TC	TC15211 3 [Phaseolus coccineus 1] TC15211 homologue to UniRef100_Q40375 Cluster: Repetitive proline-rich cell wall protein 2 precursor; n=1; Medicago truncatula|Rep: Repetitive proline-rich cell wall protein 2 precursor - Medicago truncatula (Barrel medic), partial (50%)			203	PVEKP	5	9.4	156	202
3	Fabaceae	Phaseolus	vulgaris	TC	TC13490 3 [Phaseolus vulgaris 3] TC13490 homologue to UniRef100_Q40375 Cluster: Repetitive proline-rich cell wall protein 2 precursor; n=1; Medicago truncatula|Rep: Repetitive proline-rich cell wall protein 2 precursor - Medicago truncatula (Barrel medic), partial (53%)			218	PVEKP	5	3.4	182	198
3	Fabaceae	Phaseolus	vulgaris	TC	TC17089 2 [Phaseolus vulgaris 3] TC17089 similar to UniRef100_Q40375 Cluster: Repetitive proline-rich cell wall protein 2 precursor; n=1; Medicago truncatula|Rep: Repetitive proline-rich cell wall protein 2 precursor - Medicago truncatula (Barrel medic), partial (51%)			193	PVEKP	5	16.6	96	180
3	Fabaceae	Phaseolus	vulgaris	TC	TC19362 2 [Phaseolus vulgaris 3] TC19362 similar to UniRef100_Q40375 Cluster: Repetitive proline-rich cell wall protein 2 precursor; n=1; Medicago truncatula|Rep: Repetitive proline-rich cell wall protein 2 precursor - Medicago truncatula (Barrel medic), partial (20%)			156	PVEKP	5	14	0	69
3	Vitaceae	Vitis	vinifera	TC	TC78649 1 [Vitis vinifera 6] TC78649 homologue to UniRef100_Q8LGR5 Cluster: Proline rich protein 2; n=1; Vitis vinifera|Rep: Proline rich protein 2 - Vitis vinifera (Grape), partial (85%)			248	PVEKP	5	7.6	39	79
3	Vitaceae	Vitis	vinifera	TC	TC83678 3 [Vitis vinifera 6] TC83678 homologue to UniRef100_A7NX90 Cluster: Chromosome chr5 scaffold_2, whole genome shotgun sequence; n=1; Vitis vinifera|Rep: Chromosome chr5 scaffold_2, whole genome shotgun sequence - Vitis vinifera (Grape), partial (78%)			417	PVEKP	5	29.6	40	201
3	Vitaceae	Vitis	vinifera	TC	TC91522 2 [Vitis vinifera 6] TC91522 homologue to UniRef100_Q8LGR5 Cluster: Proline rich protein 2; n=1; Vitis vinifera|Rep: Proline rich protein 2 - Vitis vinifera (Grape), partial (91%)			248	PVEKP	5	7.6	43	83
3	Vitaceae	Vitis	vinifera	TC	TC92378 1 [Vitis vinifera 6] TC92378 homologue to UniRef100_Q8LGR5 Cluster: Proline rich protein 2; n=1; Vitis vinifera|Rep: Proline rich protein 2 - Vitis vinifera (Grape), partial (66%)			173	PVEKP	5	7.6	47	87
3	Vitaceae	Vitis	vinifera	TC	FC063117 1 [Vitis vinifera 6] FC063117			114	PVEKP	5	7.6	24	64
3	Fabaceae	Glycine	soja	TA	CA799374 3 [Glycine soja release] CA799374 Nodulin precursor [Medicago truncatula (Barrel medic)]			226	PVEKP	5	27.8	22	160
3	Asteraceae	Helianthus	petiolaris	TA	DY946915 3 [Helianthus petiolaris release] DY946915 Expressed protein [Arabidopsis thaliana (Mouse-ear cress)]			188	PVEKP	5	10.4	0	51
3	Fabaceae	Trifolium	pratense	TA	BB930454 3 [Trifolium pratense release] BB930454			118	PVEKP	5	5.6	88	115
3	Vitaceae	Vitis	aestivalis	TA	TA307_3605 2 [Vitis aestivalis release] TA307_3605 Merlot proline-rich protein 2 [Vitis vinifera (Grape)]			265	PVEKP	5	19.6	5	111
3	Vitaceae	Vitis	riparia	TA	CK317674 3 [Vitis riparia release] CK317674 Merlot proline-rich protein 2 [Vitis vinifera (Grape)]			246	PVEKP	5	7.6	0	40
3	Vitaceae	Vitis	riparia	TA	CK317674 3 [Vitis riparia release] CK317674 Merlot proline-rich protein 2 [Vitis vinifera (Grape)]			246	PVEKP	5	7.6	55	95
3	Fabaceae	Cladrastis	kentukea	NR	gi|10198182|gb|AAG15241.1|AF289098_1 ENOD2 [Cladrastis kentukea]			244	PVEKP	5	3.4	212	228
3	Fabaceae	Glycine	max	TC	TC282117 1 [Glycine max 14] TC282117 UniRef100_P08012 Cluster: Repetitive proline-rich cell wall protein 1 precursor; n=1; Glycine max|Rep: Repetitive proline-rich cell wall protein 1 precursor - Glycine max (Soybean), partial (61%)			257	PVYKP	5	9.6	35	82
3	Fabaceae	Glycine	max	TC	TC282117 2 [Glycine max 14] TC282117 UniRef100_P08012 Cluster: Repetitive proline-rich cell wall protein 1 precursor; n=1; Glycine max|Rep: Repetitive proline-rich cell wall protein 1 precursor - Glycine max (Soybean), partial (61%)			257	PVYKP	5	15.2	82	158
3	Fabaceae	Glycine	max	TC	TC293916 1 [Glycine max 14] TC293916 homologue to UniRef100_P08012 Cluster: Repetitive proline-rich cell wall protein 1 precursor; n=1; Glycine max|Rep: Repetitive proline-rich cell wall protein 1 precursor - Glycine max (Soybean), partial (42%)			208	PVYKP	5	19.6	8	105
3	Fabaceae	Glycine	max	TC	TC295664 3 [Glycine max 14] TC295664 UniRef100_P08012 Cluster: Repetitive proline-rich cell wall protein 1 precursor; n=1; Glycine max|Rep: Repetitive proline-rich cell wall protein 1 precursor - Glycine max (Soybean), partial (34%)			198	PVYKP	5	10.2	34	84
3	Fabaceae	Glycine	max	TC	TC296396 2 [Glycine max 14] TC296396 homologue to UniRef100_P08012 Cluster: Repetitive proline-rich cell wall protein 1 precursor; n=1; Glycine max|Rep: Repetitive proline-rich cell wall protein 1 precursor - Glycine max (Soybean), partial (30%)			156	PVYKP	5	9.2	31	76
3	Fabaceae	Glycine	max	TC	TC299310 2 [Glycine max 14] TC299310 homologue to UniRef100_P08012 Cluster: Repetitive proline-rich cell wall protein 1 precursor; n=1; Glycine max|Rep: Repetitive proline-rich cell wall protein 1 precursor - Glycine max (Soybean), partial (43%)			188	PVYKP	5	16.8	31	114
3	Fabaceae	Glycine	max	TC	TC303103 1 [Glycine max 14] TC303103 homologue to UniRef100_P08012 Cluster: Repetitive proline-rich cell wall protein 1 precursor; n=1; Glycine max|Rep: Repetitive proline-rich cell wall protein 1 precursor - Glycine max (Soybean), partial (96%)			375	PVYKP	5	43.2	30	245
3	Fabaceae	Glycine	max	TC	TC303757 1 [Glycine max 14] TC303757 UniRef100_P08012 Cluster: Repetitive proline-rich cell wall protein 1 precursor; n=1; Glycine max|Rep: Repetitive proline-rich cell wall protein 1 precursor - Glycine max (Soybean), complete			283	PVYKP	5	44.8	31	254
3	Fabaceae	Glycine	max	TC	TC306300 3 [Glycine max 14] TC306300 homologue to UniRef100_P08012 Cluster: Repetitive proline-rich cell wall protein 1 precursor; n=1; Glycine max|Rep: Repetitive proline-rich cell wall protein 1 precursor - Glycine max (Soybean), partial (43%)			140	PVYKP	5	15.2	30	105
3	Fabaceae	Glycine	max	TC	TC306841 3 [Glycine max 14] TC306841 homologue to UniRef100_P13993 Cluster: Repetitive proline-rich cell wall protein 2 precursor; n=1; Glycine max|Rep: Repetitive proline-rich cell wall protein 2 precursor - Glycine max (Soybean), partial (43%)			173	PVYKP	5	13.4	33	100
3	Fabaceae	Glycine	max	TC	TC309828 3 [Glycine max 14] TC309828 homologue to UniRef100_P08012 Cluster: Repetitive proline-rich cell wall protein 1 precursor; n=1; Glycine max|Rep: Repetitive proline-rich cell wall protein 1 precursor - Glycine max (Soybean), partial (32%)			129	PVYKP	5	11	28	82
3	Fabaceae	Glycine	max	TC	TC312538 1 [Glycine max 14] TC312538 homologue to UniRef100_P08012 Cluster: Repetitive proline-rich cell wall protein 1 precursor; n=1; Glycine max|Rep: Repetitive proline-rich cell wall protein 1 precursor - Glycine max (Soybean), partial (55%)			157	PVYKP	5	5.2	113	138
3	Fabaceae	Glycine	max	TC	TC312538 2 [Glycine max 14] TC312538 homologue to UniRef100_P08012 Cluster: Repetitive proline-rich cell wall protein 1 precursor; n=1; Glycine max|Rep: Repetitive proline-rich cell wall protein 1 precursor - Glycine max (Soybean), partial (55%)			156	PVYKP	5	22	0	109
3	Fabaceae	Glycine	max	TC	TC327835 2 [Glycine max 14] TC327835 homologue to UniRef100_P08012 Cluster: Repetitive proline-rich cell wall protein 1 precursor; n=1; Glycine max|Rep: Repetitive proline-rich cell wall protein 1 precursor - Glycine max (Soybean), partial (52%)			138	PVYKP	5	15.6	32	109
3	Fabaceae	Glycine	max	TC	TC332335 3 [Glycine max 14] TC332335 homologue to UniRef100_P08012 Cluster: Repetitive proline-rich cell wall protein 1 precursor; n=1; Glycine max|Rep: Repetitive proline-rich cell wall protein 1 precursor - Glycine max (Soybean), partial (61%)			236	PVYKP	5	25.2	34	159
3	Fabaceae	Glycine	max	TC	TC333958 1 [Glycine max 14] TC333958 UniRef100_P15642 Cluster: Repetitive proline-rich cell wall protein 3 precursor; n=1; Glycine max|Rep: Repetitive proline-rich cell wall protein 3 precursor - Glycine max (Soybean), partial (92%)			171	PVYKP	5	9	63	109
3	Fabaceae	Glycine	max	TC	TC336161 2 [Glycine max 14] TC336161 homologue to UniRef100_Q40375 Cluster: Repetitive proline-rich cell wall protein 2 precursor; n=1; Medicago truncatula|Rep: Repetitive proline-rich cell wall protein 2 precursor - Medicago truncatula (Barrel medic), partial (54%)			208	PVYKP	5	18.6	27	119
3	Fabaceae	Glycine	max	TC	TC336684 3 [Glycine max 14] TC336684 UniRef100_P13993 Cluster: Repetitive proline-rich cell wall protein 2 precursor; n=1; Glycine max|Rep: Repetitive proline-rich cell wall protein 2 precursor - Glycine max (Soybean), partial (23%)			202	PVYKP	5	10	150	199
3	Fabaceae	Glycine	max	TC	TC339322 1 [Glycine max 14] TC339322 homologue to UniRef100_P15642 Cluster: Repetitive proline-rich cell wall protein 3 precursor; n=1; Glycine max|Rep: Repetitive proline-rich cell wall protein 3 precursor - Glycine max (Soybean), partial (50%)			119	PVYKP	5	3	104	118
3	Fabaceae	Glycine	max	TC	TC343992 2 [Glycine max 14] TC343992 homologue to UniRef100_P08012 Cluster: Repetitive proline-rich cell wall protein 1 precursor; n=1; Glycine max|Rep: Repetitive proline-rich cell wall protein 1 precursor - Glycine max (Soybean), partial (54%)			154	PVYKP	5	7	1	35
3	Fabaceae	Glycine	max	TC	TC343992 3 [Glycine max 14] TC343992 homologue to UniRef100_P08012 Cluster: Repetitive proline-rich cell wall protein 1 precursor; n=1; Glycine max|Rep: Repetitive proline-rich cell wall protein 1 precursor - Glycine max (Soybean), partial (54%)			154	PVYKP	5	20	40	139
3	Fabaceae	Glycine	max	TC	TC346320 1 [Glycine max 14] TC346320 similar to UniRef100_P08012 Cluster: Repetitive proline-rich cell wall protein 1 precursor; n=1; Glycine max|Rep: Repetitive proline-rich cell wall protein 1 precursor - Glycine max (Soybean), partial (44%)			138	PVYKP	5	13.8	27	95
3	Fabaceae	Glycine	max	TC	TC346320 1 [Glycine max 14] TC346320 similar to UniRef100_P08012 Cluster: Repetitive proline-rich cell wall protein 1 precursor; n=1; Glycine max|Rep: Repetitive proline-rich cell wall protein 1 precursor - Glycine max (Soybean), partial (44%)			138	PVYKP	5	10.4	27	78
3	Fabaceae	Glycine	max	TC	AI443911 2 [Glycine max 14] AI443911 homologue to UniRef100_P08012 Cluster: Repetitive proline-rich cell wall protein 1 precursor; n=1; Glycine max|Rep: Repetitive proline-rich cell wall protein 1 precursor - Glycine max (Soybean), partial (43%)			109	PVYKP	5	21.8	0	108
3	Fabaceae	Glycine	max	TC	AI973743 1 [Glycine max 14] AI973743 homologue to UniRef100_P08012 Cluster: Repetitive proline-rich cell wall protein 1 precursor; n=1; Glycine max|Rep: Repetitive proline-rich cell wall protein 1 precursor - Glycine max (Soybean), partial (45%)			117	PVYKP	5	8.8	30	73
3	Fabaceae	Glycine	max	TC	AI973743 3 [Glycine max 14] AI973743 homologue to UniRef100_P08012 Cluster: Repetitive proline-rich cell wall protein 1 precursor; n=1; Glycine max|Rep: Repetitive proline-rich cell wall protein 1 precursor - Glycine max (Soybean), partial (45%)			116	PVYKP	5	5	88	112
3	Fabaceae	Glycine	max	TC	BI321633 2 [Glycine max 14] BI321633 similar to UniRef100_P13993 Cluster: Repetitive proline-rich cell wall protein 2 precursor; n=1; Glycine max|Rep: Repetitive proline-rich cell wall protein 2 precursor - Glycine max (Soybean), partial (57%)			140	PVYKP	5	12.8	66	129
3	Fabaceae	Glycine	max	TC	BI700620 1 [Glycine max 14] BI700620 similar to UniRef100_P08012 Cluster: Repetitive proline-rich cell wall protein 1 precursor; n=1; Glycine max|Rep: Repetitive proline-rich cell wall protein 1 precursor - Glycine max (Soybean), partial (37%)			97	PVYKP	5	14.8	3	76
3	Fabaceae	Glycine	max	TC	BI497725 1 [Glycine max 14] BI497725 homologue to UniRef100_P13993 Cluster: Repetitive proline-rich cell wall protein 2 precursor; n=1; Glycine max|Rep: Repetitive proline-rich cell wall protein 2 precursor - Glycine max (Soybean), partial (48%)			137	PVYKP	5	20	0	100
3	Fabaceae	Glycine	max	TC	BM091892 2 [Glycine max 14] BM091892 homologue to UniRef100_P08012 Cluster: Repetitive proline-rich cell wall protein 1 precursor; n=1; Glycine max|Rep: Repetitive proline-rich cell wall protein 1 precursor - Glycine max (Soybean), partial (51%)			140	PVYKP	5	19.2	28	123
3	Fabaceae	Glycine	max	TC	BQ452741 2 [Glycine max 14] BQ452741 similar to UniRef100_P08012 Cluster: Repetitive proline-rich cell wall protein 1 precursor; n=1; Glycine max|Rep: Repetitive proline-rich cell wall protein 1 precursor - Glycine max (Soybean), partial (26%)			66	PVYKP	5	13	0	65
3	Fabaceae	Glycine	max	TC	DB985958 3 [Glycine max 14] DB985958 homologue to UniRef100_P15642 Cluster: Repetitive proline-rich cell wall protein 3 precursor; n=1; Glycine max|Rep: Repetitive proline-rich cell wall protein 3 precursor - Glycine max (Soybean), partial (93%)			164	PVYKP	5	5	26	52
3	Fabaceae	Lotus	japonicus	TC	TC41089 1 [Lotus japonicus 5] TC41089 homologue to UniRef100_Q40375 Cluster: Repetitive proline-rich cell wall protein 2 precursor; n=1; Medicago truncatula|Rep: Repetitive proline-rich cell wall protein 2 precursor - Medicago truncatula (Barrel medic), partial (82%)			328	PVYKP	5	3.4	303	319
3	Fabaceae	Lotus	japonicus	TC	TC41089 3 [Lotus japonicus 5] TC41089 homologue to UniRef100_Q40375 Cluster: Repetitive proline-rich cell wall protein 2 precursor; n=1; Medicago truncatula|Rep: Repetitive proline-rich cell wall protein 2 precursor - Medicago truncatula (Barrel medic), partial (82%)			327	PVYKP	5	53.6	34	301
3	Fabaceae	Lotus	japonicus	TC	TC49453 1 [Lotus japonicus 5] TC49453 homologue to UniRef100_Q40375 Cluster: Repetitive proline-rich cell wall protein 2 precursor; n=1; Medicago truncatula|Rep: Repetitive proline-rich cell wall protein 2 precursor - Medicago truncatula (Barrel medic), partial (69%)			372	PVYKP	5	50	1	250
3	Fabaceae	Lotus	japonicus	TC	TC53296 2 [Lotus japonicus 5] TC53296 homologue to UniRef100_Q40375 Cluster: Repetitive proline-rich cell wall protein 2 precursor; n=1; Medicago truncatula|Rep: Repetitive proline-rich cell wall protein 2 precursor - Medicago truncatula (Barrel medic), partial (49%)			182	PVYKP	5	36.2	1	181
3	Fabaceae	Lotus	japonicus	TC	TC55014 1 [Lotus japonicus 5] TC55014 homologue to UniRef100_Q40375 Cluster: Repetitive proline-rich cell wall protein 2 precursor; n=1; Medicago truncatula|Rep: Repetitive proline-rich cell wall protein 2 precursor - Medicago truncatula (Barrel medic), partial (21%)			168	PVYKP	5	11.8	0	58
3	Fabaceae	Medicago	truncatula	TC	TC115409 3 [Medicago truncatula 9] TC115409 homologue to UniRef100_Q9MAW3 Cluster: TrPRP2; n=1; Trifolium repens|Rep: TrPRP2 - Trifolium repens (Creeping white clover), partial (63%)			282	PVYKP	5	37.6	26	213
3	Fabaceae	Medicago	truncatula	TC	TC119971 2 [Medicago truncatula 9] TC119971 UniRef100_Q43564 Cluster: Repetitive proline-rich cell wall protein 1 precursor; n=1; Medicago truncatula|Rep: Repetitive proline-rich cell wall protein 1 precursor - Medicago truncatula (Barrel medic), complete			296	PVYKP	5	38	27	216
3	Fabaceae	Medicago	truncatula	TC	TC123230 1 [Medicago truncatula 9] TC123230 UniRef100_Q43564 Cluster: Repetitive proline-rich cell wall protein 1 precursor; n=1; Medicago truncatula|Rep: Repetitive proline-rich cell wall protein 1 precursor - Medicago truncatula (Barrel medic), complete			301	PVYKP	5	35.6	55	232
3	Fabaceae	Medicago	truncatula	TC	TC124575 1 [Medicago truncatula 9] TC124575 homologue to UniRef100_Q40358 Cluster: Repetitive proline-rich cell wall protein precursor; n=1; Medicago sativa|Rep: Repetitive proline-rich cell wall protein precursor - Medicago sativa (Alfalfa), partial (68%)			221	PVYKP	5	12.4	105	166
3	Fabaceae	Medicago	truncatula	TC	TC124575 3 [Medicago truncatula 9] TC124575 homologue to UniRef100_Q40358 Cluster: Repetitive proline-rich cell wall protein precursor; n=1; Medicago sativa|Rep: Repetitive proline-rich cell wall protein precursor - Medicago sativa (Alfalfa), partial (68%)			220	PVYKP	5	18.4	12	103
3	Fabaceae	Medicago	truncatula	TC	TC124779 3 [Medicago truncatula 9] TC124779 homologue to UniRef100_Q40375 Cluster: Repetitive proline-rich cell wall protein 2 precursor; n=1; Medicago truncatula|Rep: Repetitive proline-rich cell wall protein 2 precursor - Medicago truncatula (Barrel medic), partial (98%)			448	PVYKP	5	67.6	50	387
3	Fabaceae	Medicago	truncatula	TC	TC126736 3 [Medicago truncatula 9] TC126736 homologue to UniRef100_Q43564 Cluster: Repetitive proline-rich cell wall protein 1 precursor; n=1; Medicago truncatula|Rep: Repetitive proline-rich cell wall protein 1 precursor - Medicago truncatula (Barrel medic), partial (94%)			261	PVYKP	5	33.6	28	195
3	Fabaceae	Medicago	truncatula	TC	TC128537 1 [Medicago truncatula 9] TC128537 homologue to UniRef100_Q43564 Cluster: Repetitive proline-rich cell wall protein 1 precursor; n=1; Medicago truncatula|Rep: Repetitive proline-rich cell wall protein 1 precursor - Medicago truncatula (Barrel medic), partial (68%)			306	PVYKP	5	22.2	26	137
3	Fabaceae	Medicago	truncatula	TC	TC130514 2 [Medicago truncatula 9] TC130514 homologue to UniRef100_Q40375 Cluster: Repetitive proline-rich cell wall protein 2 precursor; n=1; Medicago truncatula|Rep: Repetitive proline-rich cell wall protein 2 precursor - Medicago truncatula (Barrel medic), partial (50%)			253	PVYKP	5	32	18	177
3	Fabaceae	Medicago	truncatula	TC	TC130591 2 [Medicago truncatula 9] TC130591 homologue to UniRef100_Q43564 Cluster: Repetitive proline-rich cell wall protein 1 precursor; n=1; Medicago truncatula|Rep: Repetitive proline-rich cell wall protein 1 precursor - Medicago truncatula (Barrel medic), partial (91%)			252	PVYKP	5	32	25	184
3	Fabaceae	Medicago	truncatula	TC	TC121140 1 [Medicago truncatula 9] TC121140 similar to UniRef100_Q40375 Cluster: Repetitive proline-rich cell wall protein 2 precursor; n=1; Medicago truncatula|Rep: Repetitive proline-rich cell wall protein 2 precursor - Medicago truncatula (Barrel medic), partial (66%)			255	PVYKP	5	34	66	235
3	Brassicaceae	Arabidopsis	thaliana	TC	NP206798 1 [Arabidopsis thaliana 14] NP206798 GB|AL162651.1|CAB83118.1 proline-rich protein	AT3G62680	PRP3	314	PVYKP	5	3	115	129
3	Brassicaceae	Arabidopsis	thaliana	TC	NP2698234 3 [Arabidopsis thaliana 14] NP2698234 GB|NM_116133.2|NP_191827.1 PRP3 (PROLINE-RICH PROTEIN 3); structural constituent of cell wall;similar to ATPRP1 (PROLINE-RICH PROTEIN 1) [Arabidopsis thaliana] (TAIR:AT1G54970.1); similar to TrPRP2 [Trifolium repens] (GB:BAA96106.1); contains InterPro domain Extensin-like protein;	AT3G62680	PRP3	390	PVYKP	5	3	133	147
3	Fabaceae	Medicago	truncatula	TC	TC133614 1 [Medicago truncatula 9] TC133614 homologue to UniRef100_Q43564 Cluster: Repetitive proline-rich cell wall protein 1 precursor; n=1; Medicago truncatula|Rep: Repetitive proline-rich cell wall protein 1 precursor - Medicago truncatula (Barrel medic), partial (69%)			210	PVYKP	5	23.6	25	142
3	Fabaceae	Medicago	truncatula	TC	TC135699 1 [Medicago truncatula 9] TC135699 homologue to UniRef100_Q43564 Cluster: Repetitive proline-rich cell wall protein 1 precursor; n=1; Medicago truncatula|Rep: Repetitive proline-rich cell wall protein 1 precursor - Medicago truncatula (Barrel medic), partial (81%)			317	PVYKP	5	30.6	13	166
3	Fabaceae	Medicago	truncatula	TC	TC135858 2 [Medicago truncatula 9] TC135858 UniRef100_Q40358 Cluster: Repetitive proline-rich cell wall protein precursor; n=1; Medicago sativa|Rep: Repetitive proline-rich cell wall protein precursor - Medicago sativa (Alfalfa), partial (14%)			108	PVYKP	5	6.2	11	41
3	Fabaceae	Medicago	truncatula	TC	TC136619 3 [Medicago truncatula 9] TC136619 UniRef100_Q40358 Cluster: Repetitive proline-rich cell wall protein precursor; n=1; Medicago sativa|Rep: Repetitive proline-rich cell wall protein precursor - Medicago sativa (Alfalfa), partial (10%)			99	PVYKP	5	3.6	10	27
3	Fabaceae	Medicago	truncatula	TC	TC136779 1 [Medicago truncatula 9] TC136779 homologue to UniRef100_Q40358 Cluster: Repetitive proline-rich cell wall protein precursor; n=1; Medicago sativa|Rep: Repetitive proline-rich cell wall protein precursor - Medicago sativa (Alfalfa), partial (59%)			191	PVYKP	5	23	19	133
3	Fabaceae	Medicago	truncatula	TC	TC136779 3 [Medicago truncatula 9] TC136779 homologue to UniRef100_Q40358 Cluster: Repetitive proline-rich cell wall protein precursor; n=1; Medicago sativa|Rep: Repetitive proline-rich cell wall protein precursor - Medicago sativa (Alfalfa), partial (59%)			190	PVYKP	5	3.8	0	18
3	Fabaceae	Medicago	truncatula	TC	TC136784 1 [Medicago truncatula 9] TC136784 similar to UniRef100_Q40375 Cluster: Repetitive proline-rich cell wall protein 2 precursor; n=1; Medicago truncatula|Rep: Repetitive proline-rich cell wall protein 2 precursor - Medicago truncatula (Barrel medic), partial (75%)			326	PVYKP	5	32.8	41	204
3	Fabaceae	Medicago	truncatula	TC	TC138394 2 [Medicago truncatula 9] TC138394 homologue to UniRef100_Q40375 Cluster: Repetitive proline-rich cell wall protein 2 precursor; n=1; Medicago truncatula|Rep: Repetitive proline-rich cell wall protein 2 precursor - Medicago truncatula (Barrel medic), partial (63%)			439	PVYKP	5	42	18	227
3	Fabaceae	Medicago	truncatula	TC	TC138825 3 [Medicago truncatula 9] TC138825 similar to UniRef100_Q40358 Cluster: Repetitive proline-rich cell wall protein precursor; n=1; Medicago sativa|Rep: Repetitive proline-rich cell wall protein precursor - Medicago sativa (Alfalfa), partial (83%)			211	PVYKP	5	33.8	41	209
3	Fabaceae	Medicago	truncatula	TC	TC139721 3 [Medicago truncatula 9] TC139721 homologue to UniRef100_Q43564 Cluster: Repetitive proline-rich cell wall protein 1 precursor; n=1; Medicago truncatula|Rep: Repetitive proline-rich cell wall protein 1 precursor - Medicago truncatula (Barrel medic), partial (90%)			429	PVYKP	5	32	223	382
3	Fabaceae	Medicago	truncatula	TC	TC141578 2 [Medicago truncatula 9] TC141578 homologue to UniRef100_Q43564 Cluster: Repetitive proline-rich cell wall protein 1 precursor; n=1; Medicago truncatula|Rep: Repetitive proline-rich cell wall protein 1 precursor - Medicago truncatula (Barrel medic), complete			359	PVYKP	5	35.6	26	203
3	Fabaceae	Medicago	truncatula	TC	TC141741 1 [Medicago truncatula 9] TC141741 homologue to UniRef100_Q9MAW3 Cluster: TrPRP2; n=1; Trifolium repens|Rep: TrPRP2 - Trifolium repens (Creeping white clover), partial (46%)			292	PVYKP	5	7.2	256	291
3	Fabaceae	Medicago	truncatula	TC	TC141741 3 [Medicago truncatula 9] TC141741 homologue to UniRef100_Q9MAW3 Cluster: TrPRP2; n=1; Trifolium repens|Rep: TrPRP2 - Trifolium repens (Creeping white clover), partial (46%)			291	PVYKP	5	24.6	132	254
3	Fabaceae	Medicago	truncatula	TC	TC136784 2 [Medicago truncatula 9] TC136784 similar to UniRef100_Q40375 Cluster: Repetitive proline-rich cell wall protein 2 precursor; n=1; Medicago truncatula|Rep: Repetitive proline-rich cell wall protein 2 precursor - Medicago truncatula (Barrel medic), partial (75%)			326	PVYKP	5	10.4	203	254
3	Fabaceae	Medicago	truncatula	TC	TC141164 1 [Medicago truncatula 9] TC141164 similar to UniRef100_Q43414 Cluster: Proline rich protein; n=1; Cicer arietinum|Rep: Proline rich protein - Cicer arietinum (Chickpea) (Garbanzo), partial (41%)			346	PVYKP	5	3.6	170	187
3	Fabaceae	Medicago	truncatula	TC	BG450694 1 [Medicago truncatula 9] BG450694 homologue to UniRef100_Q40375 Cluster: Repetitive proline-rich cell wall protein 2 precursor; n=1; Medicago truncatula|Rep: Repetitive proline-rich cell wall protein 2 precursor - Medicago truncatula (Barrel medic), partial (56%)			217	PVYKP	5	34.4	28	199
3	Fabaceae	Medicago	truncatula	TC	AL387459 1 [Medicago truncatula 9] AL387459 homologue to UniRef100_Q9MAW3 Cluster: TrPRP2; n=1; Trifolium repens|Rep: TrPRP2 - Trifolium repens (Creeping white clover), partial (27%)			157	PVYKP	5	12	28	87
3	Fabaceae	Medicago	truncatula	TC	BG582404 2 [Medicago truncatula 9] BG582404 homologue to UniRef100_Q40358 Cluster: Repetitive proline-rich cell wall protein precursor; n=1; Medicago sativa|Rep: Repetitive proline-rich cell wall protein precursor - Medicago sativa (Alfalfa), partial (88%)			230	PVYKP	5	36.6	27	209
3	Fabaceae	Medicago	truncatula	TC	BG584806 2 [Medicago truncatula 9] BG584806 homologue to UniRef100_Q40375 Cluster: Repetitive proline-rich cell wall protein 2 precursor; n=1; Medicago truncatula|Rep: Repetitive proline-rich cell wall protein 2 precursor - Medicago truncatula (Barrel medic), partial (33%)			193	PVYKP	5	20	18	117
3	Fabaceae	Medicago	truncatula	TC	BG585017 1 [Medicago truncatula 9] BG585017 homologue to UniRef100_Q43564 Cluster: Repetitive proline-rich cell wall protein 1 precursor; n=1; Medicago truncatula|Rep: Repetitive proline-rich cell wall protein 1 precursor - Medicago truncatula (Barrel medic), partial (93%)			199	PVYKP	5	34	29	198
3	Fabaceae	Medicago	truncatula	TC	BG586050 2 [Medicago truncatula 9] BG586050 UniRef100_Q43564 Cluster: Repetitive proline-rich cell wall protein 1 precursor; n=1; Medicago truncatula|Rep: Repetitive proline-rich cell wall protein 1 precursor - Medicago truncatula (Barrel medic), complete			267	PVYKP	5	38	61	250
3	Fabaceae	Medicago	truncatula	TC	BQ156007 3 [Medicago truncatula 9] BQ156007 homologue to UniRef100_Q40358 Cluster: Repetitive proline-rich cell wall protein precursor; n=1; Medicago sativa|Rep: Repetitive proline-rich cell wall protein precursor - Medicago sativa (Alfalfa), partial (38%)			156	PVYKP	5	16.6	2	84
3	Fabaceae	Medicago	truncatula	TC	BQ136687 1 [Medicago truncatula 9] BQ136687 homologue to UniRef100_Q43564 Cluster: Repetitive proline-rich cell wall protein 1 precursor; n=1; Medicago truncatula|Rep: Repetitive proline-rich cell wall protein 1 precursor - Medicago truncatula (Barrel medic), partial (50%)			175	PVYKP	5	16	24	103
3	Fabaceae	Medicago	truncatula	TC	BQ157625 2 [Medicago truncatula 9] BQ157625 homologue to UniRef100_Q43564 Cluster: Repetitive proline-rich cell wall protein 1 precursor; n=1; Medicago truncatula|Rep: Repetitive proline-rich cell wall protein 1 precursor - Medicago truncatula (Barrel medic), partial (37%)			144	PVYKP	5	14	3	72
3	Fabaceae	Medicago	truncatula	TC	AW560019 3 [Medicago truncatula 9] AW560019 homologue to UniRef100_Q43564 Cluster: Repetitive proline-rich cell wall protein 1 precursor; n=1; Medicago truncatula|Rep: Repetitive proline-rich cell wall protein 1 precursor - Medicago truncatula (Barrel medic), partial (80%)			202	PVYKP	5	29.8	13	161
3	Fabaceae	Medicago	truncatula	TC	BQ156779 3 [Medicago truncatula 9] BQ156779 homologue to UniRef100_Q43564 Cluster: Repetitive proline-rich cell wall protein 1 precursor; n=1; Medicago truncatula|Rep: Repetitive proline-rich cell wall protein 1 precursor - Medicago truncatula (Barrel medic), partial (70%)			207	PVYKP	5	28.2	0	140
3	Fabaceae	Medicago	truncatula	TC	CX529798 1 [Medicago truncatula 9] CX529798 homologue to UniRef100_Q40358 Cluster: Repetitive proline-rich cell wall protein precursor; n=1; Medicago sativa|Rep: Repetitive proline-rich cell wall protein precursor - Medicago sativa (Alfalfa), partial (58%)			202	PVYKP	5	22	25	134
3	Fabaceae	Medicago	truncatula	TC	AJ847087 2 [Medicago truncatula 9] AJ847087 UniRef100_Q40358 Cluster: Repetitive proline-rich cell wall protein precursor; n=1; Medicago sativa|Rep: Repetitive proline-rich cell wall protein precursor - Medicago sativa (Alfalfa), partial (16%)			92	PVYKP	5	6.8	53	86
3	Fabaceae	Medicago	truncatula	TC	BQ143991 1 [Medicago truncatula 9] BQ143991 similar to UniRef100_Q43414 Cluster: Proline rich protein; n=1; Cicer arietinum|Rep: Proline rich protein - Cicer arietinum (Chickpea) (Garbanzo), partial (45%)			245	PVYKP	5	3.6	163	180
3	Fabaceae	Phaseolus	coccineus	TC	TC14665 2 [Phaseolus coccineus 1] TC14665 similar to UniRef100_P13993 Cluster: Repetitive proline-rich cell wall protein 2 precursor; n=1; Glycine max|Rep: Repetitive proline-rich cell wall protein 2 precursor - Glycine max (Soybean), partial (50%)			137	PVYKP	5	14.4	32	103
3	Fabaceae	Phaseolus	vulgaris	TC	TC14749 3 [Phaseolus vulgaris 3] TC14749 similar to UniRef100_Q40375 Cluster: Repetitive proline-rich cell wall protein 2 precursor; n=1; Medicago truncatula|Rep: Repetitive proline-rich cell wall protein 2 precursor - Medicago truncatula (Barrel medic), partial (79%)			376	PVYKP	5	42	15	229
3	Fabaceae	Phaseolus	vulgaris	TC	TC17089 2 [Phaseolus vulgaris 3] TC17089 similar to UniRef100_Q40375 Cluster: Repetitive proline-rich cell wall protein 2 precursor; n=1; Medicago truncatula|Rep: Repetitive proline-rich cell wall protein 2 precursor - Medicago truncatula (Barrel medic), partial (51%)			193	PVYKP	5	10.2	141	192
3	Fabaceae	Phaseolus	vulgaris	TC	TC19844 1 [Phaseolus vulgaris 3] TC19844 homologue to UniRef100_P13993 Cluster: Repetitive proline-rich cell wall protein 2 precursor; n=1; Glycine max|Rep: Repetitive proline-rich cell wall protein 2 precursor - Glycine max (Soybean), partial (83%)			190	PVYKP	5	32.6	24	186
3	Fabaceae	Phaseolus	vulgaris	TC	TC18860 2 [Phaseolus vulgaris 3] TC18860 similar to UniRef100_Q40376 Cluster: Nodulin precursor; n=1; Medicago truncatula|Rep: Nodulin precursor - Medicago truncatula (Barrel medic), partial (20%)			116	PVYKP	5	15.4	25	109
3	Fabaceae	Phaseolus	vulgaris	TC	TC19597 2 [Phaseolus vulgaris 3] TC19597 similar to UniRef100_P13993 Cluster: Repetitive proline-rich cell wall protein 2 precursor; n=1; Glycine max|Rep: Repetitive proline-rich cell wall protein 2 precursor - Glycine max (Soybean), partial (71%)			189	PVYKP	5	13.6	88	162
3	Fabaceae	Phaseolus	vulgaris	TC	TC19597 2 [Phaseolus vulgaris 3] TC19597 similar to UniRef100_P13993 Cluster: Repetitive proline-rich cell wall protein 2 precursor; n=1; Glycine max|Rep: Repetitive proline-rich cell wall protein 2 precursor - Glycine max (Soybean), partial (71%)			189	PVYKP	5	11.8	15	74
3	Salicaceae	Populus	trichocarpa	TC	TC93376 3 [Populus trichocarpa NoSp] TC93376 homologue to UniRef100_Q43414 Cluster: Proline rich protein; n=1; Cicer arietinum|Rep: Proline rich protein - Cicer arietinum (Chickpea) (Garbanzo), partial (37%)			251	PVYKP	5	5.6	60	89
3	Salicaceae	Populus	trichocarpa	TC	TC95045 3 [Populus trichocarpa NoSp] TC95045 homologue to UniRef100_Q43414 Cluster: Proline rich protein; n=1; Cicer arietinum|Rep: Proline rich protein - Cicer arietinum (Chickpea) (Garbanzo), partial (44%)			271	PVYKP	5	8.6	65	110
3	Salicaceae	Populus	trichocarpa	TC	TC96245 1 [Populus trichocarpa NoSp] TC96245			242	PVYKP	5	2.6	68	81
3	Salicaceae	Populus	trichocarpa	TC	TC106063 1 [Populus trichocarpa NoSp] TC106063 similar to UniRef100_Q39686 Cluster: Proline-rich protein; n=1; Daucus carota|Rep: Proline-rich protein - Daucus carota (Carrot), partial (25%)			200	PVYKP	5	5.2	71	101
3	Salicaceae	Populus	trichocarpa	TC	TC105229 1 [Populus trichocarpa NoSp] TC105229 homologue to UniRef100_Q43414 Cluster: Proline rich protein; n=1; Cicer arietinum|Rep: Proline rich protein - Cicer arietinum (Chickpea) (Garbanzo), partial (44%)			192	PVYKP	5	8.6	62	107
3	Salicaceae	Populus	trichocarpa	TC	TC132482 2 [Populus trichocarpa NoSp] TC132482 homologue to UniRef100_Q43414 Cluster: Proline rich protein; n=1; Cicer arietinum|Rep: Proline rich protein - Cicer arietinum (Chickpea) (Garbanzo), partial (33%)			263	PVYKP	5	2.6	78	91
3	Salicaceae	Populus	trichocarpa	TC	BU867546 1 [Populus trichocarpa NoSp] BU867546 homologue to UniRef100_P13993 Cluster: Repetitive proline-rich cell wall protein 2 precursor; n=1; Glycine max|Rep: Repetitive proline-rich cell wall protein 2 precursor - Glycine max (Soybean), partial (33%)			129	PVYKP	5	2.6	96	109
3	Orobanchaceae	Triphysaria	pusilla	TC	TC8313 1 [Triphysaria pusilla NoSp] TC8313 homologue to UniRef100_Q40375 Cluster: Repetitive proline-rich cell wall protein 2 precursor; n=1; Medicago truncatula|Rep: Repetitive proline-rich cell wall protein 2 precursor - Medicago truncatula (Barrel medic), partial (21%)			263	PVYKP	5	16.6	178	262
3	Orobanchaceae	Triphysaria	pusilla	TC	TC9426 3 [Triphysaria pusilla NoSp] TC9426 similar to UniRef100_Q40375 Cluster: Repetitive proline-rich cell wall protein 2 precursor; n=1; Medicago truncatula|Rep: Repetitive proline-rich cell wall protein 2 precursor - Medicago truncatula (Barrel medic), partial (47%)			581	PVYKP	5	32.2	276	437
3	Orobanchaceae	Triphysaria	pusilla	TC	TC11916 3 [Triphysaria pusilla NoSp] TC11916 homologue to UniRef100_Q40375 Cluster: Repetitive proline-rich cell wall protein 2 precursor; n=1; Medicago truncatula|Rep: Repetitive proline-rich cell wall protein 2 precursor - Medicago truncatula (Barrel medic), partial (49%)			196	PVYKP	5	36.2	13	193
3	Orobanchaceae	Triphysaria	pusilla	TC	TC12026 3 [Triphysaria pusilla NoSp] TC12026 homologue to UniRef100_Q40375 Cluster: Repetitive proline-rich cell wall protein 2 precursor; n=1; Medicago truncatula|Rep: Repetitive proline-rich cell wall protein 2 precursor - Medicago truncatula (Barrel medic), partial (50%)			288	PVYKP	5	37.2	58	243
3	Orobanchaceae	Triphysaria	pusilla	TC	TC11693 1 [Triphysaria pusilla NoSp] TC11693 homologue to UniRef100_P13993 Cluster: Repetitive proline-rich cell wall protein 2 precursor; n=1; Glycine max|Rep: Repetitive proline-rich cell wall protein 2 precursor - Glycine max (Soybean), partial (50%)			162	PVYKP	5	3.8	0	18
3	Orobanchaceae	Triphysaria	versicolor	TC	TC3293 1 [Triphysaria versicolor 2] TC3293 homologue to UniRef100_Q40375 Cluster: Repetitive proline-rich cell wall protein 2 precursor; n=1; Medicago truncatula|Rep: Repetitive proline-rich cell wall protein 2 precursor - Medicago truncatula (Barrel medic), partial (21%)			263	PVYKP	5	16.6	178	262
3	Orobanchaceae	Triphysaria	versicolor	TC	TC5354 3 [Triphysaria versicolor 2] TC5354 homologue to UniRef100_Q40375 Cluster: Repetitive proline-rich cell wall protein 2 precursor; n=1; Medicago truncatula|Rep: Repetitive proline-rich cell wall protein 2 precursor - Medicago truncatula (Barrel medic), partial (49%)			196	PVYKP	5	36.2	13	193
3	Orobanchaceae	Triphysaria	versicolor	TC	TC5422 3 [Triphysaria versicolor 2] TC5422 homologue to UniRef100_Q40375 Cluster: Repetitive proline-rich cell wall protein 2 precursor; n=1; Medicago truncatula|Rep: Repetitive proline-rich cell wall protein 2 precursor - Medicago truncatula (Barrel medic), partial (50%)			288	PVYKP	5	37.2	58	243
3	Orobanchaceae	Triphysaria	versicolor	TC	TC5197 1 [Triphysaria versicolor 2] TC5197 homologue to UniRef100_P13993 Cluster: Repetitive proline-rich cell wall protein 2 precursor; n=1; Glycine max|Rep: Repetitive proline-rich cell wall protein 2 precursor - Glycine max (Soybean), partial (50%)			162	PVYKP	5	3.8	0	18
3	Brassicaceae	Brassica	napus	TC	ES906800 1 [Brassica napus 3-1] ES906800 similar to UniRef100_Q9M7P1 Cluster: Proline-rich protein 1; n=1; Arabidopsis thaliana|Rep: Proline-rich protein 1 - Arabidopsis thaliana (Mouse-ear cress), partial (41%)			262	PVYKP	5	4.6	67	91
3	Fabaceae	Glycine	soja	TA	TA2570_3848 2 [Glycine soja release] TA2570_3848 PREDICTED: similar to CG32602-PA [Rattus norvegicus]			300	PVYKP	5	15	0	74
3	Fabaceae	Glycine	soja	TA	TA2570_3848 3 [Glycine soja release] TA2570_3848 PREDICTED: similar to CG32602-PA [Rattus norvegicus]			299	PVYKP	5	22.8	75	188
3	Fabaceae	Glycine	soja	TA	BG046316 1 [Glycine soja release] BG046316 Soybean (G.max) hydroproline-rich protein [Glycine max (Soybean)]			147	PVYKP	5	5	61	85
3	Fabaceae	Glycine	soja	TA	BG046316 2 [Glycine soja release] BG046316 Soybean (G.max) hydroproline-rich protein [Glycine max (Soybean)]			147	PVYKP	5	2.8	5	18
3	Fabaceae	Glycine	soja	TA	BG046316 2 [Glycine soja release] BG046316 Soybean (G.max) hydroproline-rich protein [Glycine max (Soybean)]			147	PVYKP	5	4	32	51
3	Fabaceae	Glycine	soja	TA	CA785593 3 [Glycine soja release] CA785593			64	PVYKP	5	7.4	27	63
3	Fabaceae	Lotus	corniculatus	TA	TA55_47247 1 [Lotus corniculatus release] TA55_47247 Repetitive proline-rich cell wall protein 2 precursor related cluster			508	PVYKP	5	72.6	28	390
3	Fabaceae	Lupinus	albus	TA	TA424_3870 3 [Lupinus albus release] TA424_3870 Nodulin precursor [Medicago truncatula (Barrel medic)]			220	PVYKP	5	21.6	28	135
3	Fabaceae	Lupinus	albus	TA	CA411504 3 [Lupinus albus release] CA411504 Nodulin precursor [Medicago truncatula (Barrel medic)]			196	PVYKP	5	13.4	129	195
3	Fabaceae	Medicago	sativa	TA	TA750_3879 1 [Medicago sativa release] TA750_3879 UPI00006A1768 UniRef100 entry [Xenopus tropicalis]			163	PVYKP	5	25.6	35	162
3	Fabaceae	Medicago	sativa	TA	TA751_3879 2 [Medicago sativa release] TA751_3879 Proline-rich protein [Glycine max (Soybean)]			217	PVYKP	5	36.2	34	214
3	Fabaceae	Medicago	sativa	TA	TA752_3879 2 [Medicago sativa release] TA752_3879 Proline-rich protein [Glycine max (Soybean)]			183	PVYKP	5	14.2	32	103
3	Fabaceae	Medicago	sativa	TA	TA753_3879 1 [Medicago sativa release] TA753_3879 UPI00006A1768 UniRef100 entry [Xenopus tropicalis]			326	PVYKP	5	41.6	35	242
3	Fabaceae	Medicago	sativa	TA	TA754_3879 1 [Medicago sativa release] TA754_3879 UPI00006A1768 UniRef100 entry [Xenopus tropicalis]			191	PVYKP	5	26	35	164
3	Fabaceae	Medicago	sativa	TA	TA755_3879 2 [Medicago sativa release] TA755_3879 UPI00006A1768 UniRef100 entry [Xenopus tropicalis]			185	PVYKP	5	30	35	184
3	Fabaceae	Medicago	sativa	TA	CO512257 2 [Medicago sativa release] CO512257 Soybean (G.max) hydroproline-rich protein [Glycine max (Soybean)]			195	PVYKP	5	32.2	34	194
3	Fabaceae	Medicago	sativa	TA	CO512966 3 [Medicago sativa release] CO512966 Proline-rich protein [Glycine max (Soybean)]			188	PVYKP	5	30.8	33	186
3	Fabaceae	Medicago	sativa	TA	CO513718 2 [Medicago sativa release] CO513718 Nodulin precursor [Medicago truncatula (Barrel medic)]			64	PVYKP	5	6	34	63
3	Fabaceae	Medicago	sativa	TA	CO515577 2 [Medicago sativa release] CO515577 Nodulin precursor [Medicago truncatula (Barrel medic)]			144	PVYKP	5	7.6	34	71
3	Fabaceae	Medicago	sativa	TA	CO516510 1 [Medicago sativa release] CO516510 Nodulin precursor [Medicago truncatula (Barrel medic)]			136	PVYKP	5	4	34	53
3	Lamiaceae	Ocimum	basilicum	TA	TA1725_39350 2 [Ocimum basilicum release] TA1725_39350			222	PVYKP	5	2.4	76	87
3	Fabaceae	Pisum	sativum	TA	AJ233399 1 [Pisum sativum release] AJ233399 Nodulin precursor [Medicago truncatula (Barrel medic)]			275	PVYKP	5	32.8	29	192
3	Salicaceae	Populus	euphratica	TA	TA2193_75702 1 [Populus euphratica release] TA2193_75702			200	PVYKP	5	5.2	71	101
3	Salicaceae	Populus	euphratica	TA	TA2195_75702 1 [Populus euphratica release] TA2195_75702			242	PVYKP	5	2.6	68	81
3	Fabaceae	Arachis	hypogaea	TA	TA964_3818 2 [Arachis hypogaea release] TA964_3818			210	PVYKP	5	10.2	49	100
3	Fabaceae	Arachis	stenosperma	TA	TA14_217475 3 [Arachis stenosperma release] TA14_217475 Cluster: Repetitive proline-rich cell wall protein 1 precursor; n=1; Glycine max|Rep: Repetitive proline-rich cell wall protein 1 precursor - Glycine max (Soybean)			245	PVYKP	5	9.2	63	110
3	Fabaceae	Arachis	stenosperma	TA	EH042999 1 [Arachis stenosperma release] EH042999 Cluster: Repetitive proline-rich cell wall protein 1 precursor; n=1; Glycine max|Rep: Repetitive proline-rich cell wall protein 1 precursor - Glycine max (Soybean)			239	PVYKP	5	8.6	48	92
3	Fabaceae	Arachis	stenosperma	TA	EH044007 3 [Arachis stenosperma release] EH044007 Cluster: Repetitive proline-rich cell wall protein 1 precursor; n=1; Glycine max|Rep: Repetitive proline-rich cell wall protein 1 precursor - Glycine max (Soybean)			166	PVYKP	5	8.2	13	55
3	Fabaceae	Arachis	stenosperma	TA	EH044218 3 [Arachis stenosperma release] EH044218 Cluster: Repetitive proline-rich cell wall protein 1 precursor; n=1; Glycine max|Rep: Repetitive proline-rich cell wall protein 1 precursor - Glycine max (Soybean)			260	PVYKP	5	9.2	62	109
3	Fabaceae	Arachis	stenosperma	TA	EH044233 3 [Arachis stenosperma release] EH044233 Cluster: Repetitive proline-rich cell wall protein 1 precursor; n=1; Glycine max|Rep: Repetitive proline-rich cell wall protein 1 precursor - Glycine max (Soybean)			188	PVYKP	5	9.2	61	108
3	Fabaceae	Arachis	stenosperma	TA	EH044234 2 [Arachis stenosperma release] EH044234 Cluster: Repetitive proline-rich cell wall protein 1 precursor; n=1; Glycine max|Rep: Repetitive proline-rich cell wall protein 1 precursor - Glycine max (Soybean)			168	PVYKP	5	9.2	62	109
3	Fabaceae	Arachis	stenosperma	TA	EH044258 1 [Arachis stenosperma release] EH044258 Cluster: Repetitive proline-rich cell wall protein 1 precursor; n=1; Glycine max|Rep: Repetitive proline-rich cell wall protein 1 precursor - Glycine max (Soybean)			237	PVYKP	5	8.6	38	82
3	Fabaceae	Arachis	stenosperma	TA	EH045968 3 [Arachis stenosperma release] EH045968 Cluster: Repetitive proline-rich cell wall protein precursor; n=1; Medicago sativa|Rep: Repetitive proline-rich cell wall protein precursor - Medicago sativa (Alfalfa)			219	PVYKP	5	9.2	62	109
3	Fabaceae	Arachis	stenosperma	TA	EH046151 1 [Arachis stenosperma release] EH046151 Cluster: Repetitive proline-rich cell wall protein precursor; n=1; Medicago sativa|Rep: Repetitive proline-rich cell wall protein precursor - Medicago sativa (Alfalfa)			198	PVYKP	5	9.2	42	89
3	Fabaceae	Arachis	stenosperma	TA	EH046573 1 [Arachis stenosperma release] EH046573 Cluster: Repetitive proline-rich cell wall protein 1 precursor; n=1; Glycine max|Rep: Repetitive proline-rich cell wall protein 1 precursor - Glycine max (Soybean)			230	PVYKP	5	9.2	63	110
3	Fabaceae	Arachis	stenosperma	TA	EH046924 2 [Arachis stenosperma release] EH046924 Cluster: Repetitive proline-rich cell wall protein 1 precursor; n=1; Glycine max|Rep: Repetitive proline-rich cell wall protein 1 precursor - Glycine max (Soybean)			221	PVYKP	5	9.2	64	111
3	Fabaceae	Arachis	stenosperma	TA	EH047530 2 [Arachis stenosperma release] EH047530 Cluster: Repetitive proline-rich cell wall protein 1 precursor; n=1; Glycine max|Rep: Repetitive proline-rich cell wall protein 1 precursor - Glycine max (Soybean)			214	PVYKP	5	9.2	57	104
3	Fabaceae	Arachis	stenosperma	TA	EH047957 2 [Arachis stenosperma release] EH047957 Cluster: Repetitive proline-rich cell wall protein 1 precursor; n=1; Glycine max|Rep: Repetitive proline-rich cell wall protein 1 precursor - Glycine max (Soybean)			264	PVYKP	5	9.2	58	105
3	Fabaceae	Arachis	stenosperma	TA	EH047960 2 [Arachis stenosperma release] EH047960 Cluster: Repetitive proline-rich cell wall protein 1 precursor; n=1; Glycine max|Rep: Repetitive proline-rich cell wall protein 1 precursor - Glycine max (Soybean)			221	PVYKP	5	9.2	58	105
3	Fabaceae	Trifolium	pratense	TA	TA1535_57577 2 [Trifolium pratense release] TA1535_57577 Proline-rich protein [Glycine max (Soybean)]			196	PVYKP	5	33.6	28	195
3	Fabaceae	Trifolium	pratense	TA	TA1824_57577 2 [Trifolium pratense release] TA1824_57577 PREDICTED: similar to CG32602-PA [Rattus norvegicus]			238	PVYKP	5	42.2	27	237
3	Fabaceae	Trifolium	pratense	TA	TA2002_57577 2 [Trifolium pratense release] TA2002_57577 Soybean (G.max) hydroproline-rich protein [Glycine max (Soybean)]			218	PVYKP	5	39	23	217
3	Fabaceae	Trifolium	pratense	TA	AB236816 2 [Trifolium pratense release] AB236816			644	PVYKP	5	5.4	458	484
3	Fabaceae	Trifolium	pratense	TA	BB906547 3 [Trifolium pratense release] BB906547 Soybean (G.max) hydroproline-rich protein [Glycine max (Soybean)]			192	PVYKP	5	33.6	24	191
3	Fabaceae	Trifolium	pratense	TA	BB907468 3 [Trifolium pratense release] BB907468 PREDICTED: similar to CG32602-PA [Rattus norvegicus]			192	PVYKP	5	33	27	191
3	Fabaceae	Trifolium	pratense	TA	BB916191 2 [Trifolium pratense release] BB916191 Proline-rich protein [Glycine max (Soybean)]			71	PVYKP	5	11.2	15	70
3	Fabaceae	Trifolium	pratense	TA	BB926325 3 [Trifolium pratense release] BB926325 PREDICTED: similar to CG32602-PA [Rattus norvegicus]			193	PVYKP	5	34.2	22	192
3	Fabaceae	Trifolium	pratense	TA	BB929865 3 [Trifolium pratense release] BB929865 Proline-rich protein [Glycine max (Soybean)]			178	PVYKP	5	30.6	24	176
3	Fabaceae	Trifolium	pratense	TA	BB930580 2 [Trifolium pratense release] BB930580 Nodulin precursor [Medicago truncatula (Barrel medic)]			117	PVYKP	5	11.8	58	116
3	Fabaceae	Trifolium	pratense	TA	BB931091 3 [Trifolium pratense release] BB931091 Proline-rich protein [Glycine max (Soybean)]			229	PVYKP	5	11.8	15	73
3	Fabaceae	Trifolium	pratense	TA	BB934096 1 [Trifolium pratense release] BB934096 PREDICTED: similar to CG32602-PA [Rattus norvegicus]			190	PVYKP	5	37.8	1	189
3	Fabaceae	Trifolium	pratense	TA	BB934705 2 [Trifolium pratense release] BB934705 Soybean (G.max) hydroproline-rich protein [Glycine max (Soybean)]			207	PVYKP	5	36.6	23	205
3	Fabaceae	Trifolium	pratense	TA	BB936705 3 [Trifolium pratense release] BB936705 Soybean (G.max) hydroproline-rich protein [Glycine max (Soybean)]			201	PVYKP	5	35.6	23	200
3	Fabaceae	Trifolium	pratense	TA	BB937064 1 [Trifolium pratense release] BB937064 Nodulin precursor [Medicago truncatula (Barrel medic)]			113	PVYKP	5	11.4	0	56
3	Fabaceae	Trifolium	pratense	TA	BB937397 1 [Trifolium pratense release] BB937397 Nodulin precursor [Medicago truncatula (Barrel medic)]			127	PVYKP	5	12	65	124
3	Fabaceae	Trifolium	pratense	TA	BB938534 1 [Trifolium pratense release] BB938534 PREDICTED: similar to CG32602-PA [Rattus norvegicus]			262	PVYKP	5	23.8	26	147
3	Fabaceae	Trifolium	pratense	TA	BB939091 1 [Trifolium pratense release] BB939091 Proline-rich protein [Glycine max (Soybean)]			102	PVYKP	5	20	0	99
3	Fabaceae	Trifolium	repens	NR	gi|8096255|dbj|BAA96106.1| TrPRP2 [Trifolium repens]			343	PVYKP	5	61	25	329
3	Malvaceae	Gossypium	hirsutum	TC	CO083858 1 [Gossypium hirsutum NoSp] CO083858 similar to UniRef100_Q5BWU8 Cluster: SJCHGC01965 protein; n=1; Schistosoma japonicum|Rep: SJCHGC01965 protein - Schistosoma japonicum (Blood fluke), partial (30%)			179	PPEKP	5	3	53	67
3	Malvaceae	Gossypium	raimondii	TC	CO083858 1 [Gossypium raimondii 1] CO083858 similar to UniRef100_Q5BWU8 Cluster: SJCHGC01965 protein; n=1; Schistosoma japonicum|Rep: SJCHGC01965 protein - Schistosoma japonicum (Blood fluke), partial (30%)			179	PPEKP	5	3	53	67
3	Poaceae	Zea	mays	TC	DV030701 2 [Zea mays 19] DV030701 weakly similar to UniRef100_Q8IU42 Cluster: Formin homology protein A; n=1; Dictyostelium discoideum|Rep: Formin homology protein A - Dictyostelium discoideum (Slime mold), partial (5%)			208	PPEKP	5	2	53	64
3	Poaceae	Zea	mays	TC	EE290876 3 [Zea mays 19] EE290876 similar to UniRef100_A5JUU8 Cluster: Formin B; n=2; Trypanosoma brucei|Rep: Formin B - Trypanosoma brucei TREU927, partial (6%)			174	PPEKP	5	2.6	155	167
3	Vitaceae	Vitis	aestivalis	TA	CB288675 3 [Vitis aestivalis release] CB288675 Merlot proline-rich protein 2 [Vitis vinifera (Grape)]			230	PPEKP	5	34.2	38	226
3	Vitaceae	Vitis	riparia	TA	CK317674 3 [Vitis riparia release] CK317674 Merlot proline-rich protein 2 [Vitis vinifera (Grape)]			246	PPEKP	5	7.6	100	141
3	Fabaceae	Medicago	sativa	NR	gi|3914441|sp|Q40358.1|PRP_MEDSA RecName: Full=Repetitive proline-rich cell wall protein; AltName: Full=MSPRP; Flags: Precursor gi|166408|gb|AAB48006.1| MsPRP [Medicago sativa]			236	PVYKP	5	41.6	25	232
3	Fabaceae	Pisum	sativum	NR	gi|6580688|emb|CAB63486.1| proline-rich protein [Pisum sativum]			214	PVYKP	5	32.8	24	187
3	Fabaceae	Glycine	max	NR	gi|255641352|gb|ACU20953.1| unknown [Glycine max]			161	PVYKP	5	25.2	29	154
3	Fabaceae	Trifolium	pratense	NR	gi|84468370|dbj|BAE71268.1| hypothetical protein [Trifolium pratense]			478	PVYKP	5	5.4	362	388
3	Brassicaceae	Arabidopsis	thaliana	NR	gi|15228828|ref|NP_191827.1| PRP3 (PROLINE-RICH PROTEIN 3); structural constituent of cell wall [Arabidopsis thaliana] gi|7362748|emb|CAB83118.1| proline-rich protein [Arabidopsis thaliana]	AT3G62680	PRP3	313	PVYKP	5	3	115	129
3	Salicaceae	Populus	trichocarpa	NR	gi|224107867|ref|XP_002314633.1| predicted protein [Populus trichocarpa] gi|118485688|gb|ABK94694.1| unknown [Populus trichocarpa] gi|222863673|gb|EEF00804.1| predicted protein [Populus trichocarpa]			182	PVYKP	5	8.6	60	105
3	Vitaceae	Vitis	vinifera	NR	gi|225433078|ref|XP_002285104.1| PREDICTED: hypothetical protein [Vitis vinifera]			306	PVEKP	5	7.6	83	123
3	Fabaceae	Glycine	max	TC	TC300975 1 [Glycine max 14] TC300975 similar to UniRef100_Q41106 Cluster: Proline-rich protein precursor; n=1; Phaseolus vulgaris|Rep: Proline-rich protein precursor - Phaseolus vulgaris (Kidney bean) (French bean), partial (61%)			153	PVYKKP	6	2	38	49
3	Fabaceae	Glycine	max	TC	TC314433 2 [Glycine max 14] TC314433 UniRef100_P15642 Cluster: Repetitive proline-rich cell wall protein 3 precursor; n=1; Glycine max|Rep: Repetitive proline-rich cell wall protein 3 precursor - Glycine max (Soybean), complete			174	PVYKKP	6	8.83	54	108
3	Fabaceae	Glycine	max	TC	TC323536 3 [Glycine max 14] TC323536 homologue to UniRef100_P15642 Cluster: Repetitive proline-rich cell wall protein 3 precursor; n=1; Glycine max|Rep: Repetitive proline-rich cell wall protein 3 precursor - Glycine max (Soybean), partial (96%)			129	PVYKKP	6	8.17	46	96
3	Fabaceae	Glycine	max	TC	TC334935 2 [Glycine max 14] TC334935 UniRef100_P15642 Cluster: Repetitive proline-rich cell wall protein 3 precursor; n=1; Glycine max|Rep: Repetitive proline-rich cell wall protein 3 precursor - Glycine max (Soybean), complete			192	PVYKKP	6	8.83	44	98
3	Fabaceae	Glycine	max	TC	BG155043 2 [Glycine max 14] BG155043 similar to UniRef100_Q41106 Cluster: Proline-rich protein precursor; n=1; Phaseolus vulgaris|Rep: Proline-rich protein precursor - Phaseolus vulgaris (Kidney bean) (French bean), partial (67%)			158	PVYKKP	6	2	77	88
3	Fabaceae	Glycine	max	TC	BI322093 1 [Glycine max 14] BI322093 similar to UniRef100_Q41106 Cluster: Proline-rich protein precursor; n=1; Phaseolus vulgaris|Rep: Proline-rich protein precursor - Phaseolus vulgaris (Kidney bean) (French bean), partial (61%)			130	PVYKKP	6	2	49	60
3	Fabaceae	Glycine	soja	TA	TA2578_3848 2 [Glycine soja release] TA2578_3848			184	PVYKKP	6	8.83	35	89
3	Fabaceae	Glycine	soja	TA	TA3703_3848 1 [Glycine soja release] TA3703_3848			166	PVYKKP	6	2	39	50
3	Marchantiaceae	Marchantia	polymorpha	TA	TA602_3197 3 [Marchantia polymorpha release] TA602_3197			485	YEYKPP	6	34	110	335
3	Fabaceae	Glycine	max	NR	gi|131004|sp|P15642.1|PRP3_SOYBN RecName: Full=Repetitive proline-rich cell wall protein 3; Flags: Precursor gi|170068|gb|AAA34012.1| cell wall protein (SbPRP3) precursor gi|255629037|gb|ACU14863.1| unknown [Glycine max]			90	PVYKKP	6	8.83	29	83
3	Fabaceae	Phaseolus	vulgaris	TC	TC11567 3 [Phaseolus vulgaris 3] TC11567			243	YEYKPPP	7	15.71	1	114
3	Fabaceae	Phaseolus	vulgaris	TC	TC12052 2 [Phaseolus vulgaris 3] TC12052 weakly similar to UniRef100_Q6GUG3 Cluster: Serine/proline-rich repeat protein; n=2; Lupinus angustifolius|Rep: Serine/proline-rich repeat protein - Lupinus angustifolius (Narrow-leaved blue lupin), partial (19%)			258	YEYKPPP	7	10	57	127
3	Fabaceae	Phaseolus	vulgaris	TC	TC15127 2 [Phaseolus vulgaris 3] TC15127			218	YEYKPPP	7	7.14	56	105
3	Marchantiaceae	Marchantia	polymorpha	TA	TA603_3197 2 [Marchantia polymorpha release] TA603_3197			269	YEYKPPP	7	21.29	109	257
3	Marchantiaceae	Marchantia	polymorpha	TA	BJ851617 3 [Marchantia polymorpha release] BJ851617			211	YEYKPPP	7	3.71	117	142
3	Fabaceae	Glycine	max	TC	TC342826 3 [Glycine max 14] TC342826 UniRef100_P15642 Cluster: Repetitive proline-rich cell wall protein 3 precursor; n=1; Glycine max|Rep: Repetitive proline-rich cell wall protein 3 precursor - Glycine max (Soybean), partial (73%)			171	YKPKPPV	7	5.29	130	170
3	Fabaceae	Phaseolus	vulgaris	TC	TC15046 2 [Phaseolus vulgaris 3] TC15046 UniRef100_Q41106 Cluster: Proline-rich protein precursor; n=1; Phaseolus vulgaris|Rep: Proline-rich protein precursor - Phaseolus vulgaris (Kidney bean) (French bean), complete			178	YKPKPPV	7	7.29	45	95
3	Fabaceae	Phaseolus	vulgaris	TC	TC17399 2 [Phaseolus vulgaris 3] TC17399 UniRef100_Q41106 Cluster: Proline-rich protein precursor; n=1; Phaseolus vulgaris|Rep: Proline-rich protein precursor - Phaseolus vulgaris (Kidney bean) (French bean), partial (92%)			166	YKPKPPV	7	6.29	40	83
3	Cucurbitaceae	Cucumis	sativus	TA	AB029115 1 [Cucumis sativus release] AB029115			244	YKPKPPV	7	10.29	1	73
3	Alliaceae	Allium	cepa	TC	TC6439 3 [Allium cepa 2] TC6439 similar to UniRef100_O82066 Cluster: Proline-rich protein; n=1; Solanum tuberosum|Rep: Proline-rich protein - Solanum tuberosum (Potato), partial (29%)			418	PVYKPPT	7	14.57	202	303
3	Convolvulaceae	Ipomoea	nil	TC	TC5794 2 [Ipomoea nil 1] TC5794 similar to UniRef100_P15642 Cluster: Repetitive proline-rich cell wall protein 3 precursor; n=1; Glycine max|Rep: Repetitive proline-rich cell wall protein 3 precursor - Glycine max (Soybean), partial (42%)			275	PVYKPPT	7	5.71	95	136
3	Zamiaceae	Zamia	fischeri	TA	TA205_34342 3 [Zamia fischeri release] TA205_34342			288	PVYKPPT	7	2	182	195
3	Zamiaceae	Zamia	fischeri	TA	TA206_34342 1 [Zamia fischeri release] TA206_34342			221	PVYKPPT	7	2	51	64
3	Fabaceae	Glycine	max	TC	TC283774 2 [Glycine max 14] TC283774 similar to UniRef100_P13993 Cluster: Repetitive proline-rich cell wall protein 2 precursor; n=1; Glycine max|Rep: Repetitive proline-rich cell wall protein 2 precursor - Glycine max (Soybean), partial (62%)			226	PVYKPPVEKP	10	11.8	20	137
3	Fabaceae	Glycine	max	TC	TC294770 2 [Glycine max 14] TC294770 homologue to UniRef100_P17786 Cluster: Elongation factor 1-alpha; n=4; Solanoideae|Rep: Elongation factor 1-alpha - Solanum lycopersicum (Tomato) (Lycopersicon esculentum), partial (61%)			475	PVYKPPVEKP	10	9.7	22	118
3	Fabaceae	Glycine	max	TC	TC294770 2 [Glycine max 14] TC294770 homologue to UniRef100_P17786 Cluster: Elongation factor 1-alpha; n=4; Solanoideae|Rep: Elongation factor 1-alpha - Solanum lycopersicum (Tomato) (Lycopersicon esculentum), partial (61%)			475	PVYKPPVEKP	10	9.7	22	118
3	Fabaceae	Glycine	max	TC	TC295725 2 [Glycine max 14] TC295725 similar to UniRef100_P13993 Cluster: Repetitive proline-rich cell wall protein 2 precursor; n=1; Glycine max|Rep: Repetitive proline-rich cell wall protein 2 precursor - Glycine max (Soybean), partial (73%)			250	PVYKPPVEKP	10	12.7	35	161
3	Fabaceae	Glycine	max	TC	TC299535 3 [Glycine max 14] TC299535 homologue to UniRef100_P13993 Cluster: Repetitive proline-rich cell wall protein 2 precursor; n=1; Glycine max|Rep: Repetitive proline-rich cell wall protein 2 precursor - Glycine max (Soybean), partial (73%)			237	PVYKPPVEKP	10	14.3	9	151
3	Fabaceae	Glycine	max	TC	TC300097 2 [Glycine max 14] TC300097 UniRef100_P13993 Cluster: Repetitive proline-rich cell wall protein 2 precursor; n=1; Glycine max|Rep: Repetitive proline-rich cell wall protein 2 precursor - Glycine max (Soybean), complete			404	PVYKPPVEKP	10	19.8	123	320
3	Fabaceae	Glycine	max	TC	TC300896 3 [Glycine max 14] TC300896 homologue to UniRef100_P13993 Cluster: Repetitive proline-rich cell wall protein 2 precursor; n=1; Glycine max|Rep: Repetitive proline-rich cell wall protein 2 precursor - Glycine max (Soybean), partial (63%)			227	PVYKPPVEKP	10	11.9	30	148
3	Fabaceae	Glycine	max	TC	TC302554 3 [Glycine max 14] TC302554 homologue to UniRef100_P13993 Cluster: Repetitive proline-rich cell wall protein 2 precursor; n=1; Glycine max|Rep: Repetitive proline-rich cell wall protein 2 precursor - Glycine max (Soybean), partial (75%)			245	PVYKPPVEKP	10	15	9	158
3	Fabaceae	Glycine	max	TC	TC300097 2 [Glycine max 14] TC300097 UniRef100_P13993 Cluster: Repetitive proline-rich cell wall protein 2 precursor; n=1; Glycine max|Rep: Repetitive proline-rich cell wall protein 2 precursor - Glycine max (Soybean), complete			404	PVYKPPVEKP	10	18.9	121	309
3	Fabaceae	Glycine	max	TC	TC302554 3 [Glycine max 14] TC302554 homologue to UniRef100_P13993 Cluster: Repetitive proline-rich cell wall protein 2 precursor; n=1; Glycine max|Rep: Repetitive proline-rich cell wall protein 2 precursor - Glycine max (Soybean), partial (75%)			245	PVYKPPVEKP	10	15	9	158
3	Fabaceae	Glycine	max	TC	TC306841 3 [Glycine max 14] TC306841 homologue to UniRef100_P13993 Cluster: Repetitive proline-rich cell wall protein 2 precursor; n=1; Glycine max|Rep: Repetitive proline-rich cell wall protein 2 precursor - Glycine max (Soybean), partial (43%)			173	PVYKPPVEKP	10	5.9	31	89
3	Fabaceae	Glycine	max	TC	TC326784 1 [Glycine max 14] TC326784 UniRef100_P13993 Cluster: Repetitive proline-rich cell wall protein 2 precursor; n=1; Glycine max|Rep: Repetitive proline-rich cell wall protein 2 precursor - Glycine max (Soybean), partial (61%)			146	PVYKPPVEKP	10	10.5	29	133
3	Fabaceae	Glycine	max	TC	TC336161 3 [Glycine max 14] TC336161 homologue to UniRef100_Q40375 Cluster: Repetitive proline-rich cell wall protein 2 precursor; n=1; Medicago truncatula|Rep: Repetitive proline-rich cell wall protein 2 precursor - Medicago truncatula (Barrel medic), partial (54%)			208	PVYKPPVEKP	10	8.7	121	207
3	Fabaceae	Glycine	max	TC	TC336161 2 [Glycine max 14] TC336161 homologue to UniRef100_Q40375 Cluster: Repetitive proline-rich cell wall protein 2 precursor; n=1; Medicago truncatula|Rep: Repetitive proline-rich cell wall protein 2 precursor - Medicago truncatula (Barrel medic), partial (54%)			208	PVYKPPVEKP	10	9.3	27	119
3	Fabaceae	Glycine	max	TC	BG652293 2 [Glycine max 14] BG652293 homologue to UniRef100_P13993 Cluster: Repetitive proline-rich cell wall protein 2 precursor; n=1; Glycine max|Rep: Repetitive proline-rich cell wall protein 2 precursor - Glycine max (Soybean), partial (55%)			138	PVYKPPVEKP	10	11.5	0	114
3	Fabaceae	Lotus	japonicus	TC	TC42107 2 [Lotus japonicus 5] TC42107 similar to UniRef100_Q9MAW3 Cluster: TrPRP2; n=1; Trifolium repens|Rep: TrPRP2 - Trifolium repens (Creeping white clover), partial (29%)			341	PVYKPPVEKP	10	6.4	50	113
3	Fabaceae	Medicago	truncatula	TC	TC114982 3 [Medicago truncatula 9] TC114982 UniRef100_Q40376 Cluster: Nodulin precursor; n=1; Medicago truncatula|Rep: Nodulin precursor - Medicago truncatula (Barrel medic), complete			639	PVYKPPVEKP	10	5.1	494	544
3	Fabaceae	Medicago	truncatula	TC	TC117681 2 [Medicago truncatula 9] TC117681 UniRef100_Q40375 Cluster: Repetitive proline-rich cell wall protein 2 precursor; n=1; Medicago truncatula|Rep: Repetitive proline-rich cell wall protein 2 precursor - Medicago truncatula (Barrel medic), complete			506	PVYKPPVEKP	10	34	43	382
3	Fabaceae	Medicago	truncatula	TC	TC121140 1 [Medicago truncatula 9] TC121140 similar to UniRef100_Q40375 Cluster: Repetitive proline-rich cell wall protein 2 precursor; n=1; Medicago truncatula|Rep: Repetitive proline-rich cell wall protein 2 precursor - Medicago truncatula (Barrel medic), partial (66%)			255	PVYKPPVEKP	10	23.6	11	251
3	Fabaceae	Medicago	truncatula	TC	TC125828 1 [Medicago truncatula 9] TC125828 similar to UniRef100_Q40375 Cluster: Repetitive proline-rich cell wall protein 2 precursor; n=1; Medicago truncatula|Rep: Repetitive proline-rich cell wall protein 2 precursor - Medicago truncatula (Barrel medic), partial (61%)			345	PVYKPPVEKP	10	19.1	8	198
3	Fabaceae	Medicago	truncatula	TC	TC136023 3 [Medicago truncatula 9] TC136023 homologue to UniRef100_Q40375 Cluster: Repetitive proline-rich cell wall protein 2 precursor; n=1; Medicago truncatula|Rep: Repetitive proline-rich cell wall protein 2 precursor - Medicago truncatula (Barrel medic), partial (48%)			478	PVYKPPVEKP	10	15	281	430
3	Fabaceae	Medicago	truncatula	TC	TC136784 1 [Medicago truncatula 9] TC136784 similar to UniRef100_Q40375 Cluster: Repetitive proline-rich cell wall protein 2 precursor; n=1; Medicago truncatula|Rep: Repetitive proline-rich cell wall protein 2 precursor - Medicago truncatula (Barrel medic), partial (75%)			326	PVYKPPVEKP	10	8.9	26	114
3	Fabaceae	Medicago	truncatula	TC	AJ388735 1 [Medicago truncatula 9] AJ388735 homologue to UniRef100_Q40358 Cluster: Repetitive proline-rich cell wall protein precursor; n=1; Medicago sativa|Rep: Repetitive proline-rich cell wall protein precursor - Medicago sativa (Alfalfa), partial (43%)			173	PVYKPPVEKP	10	7.7	25	101
3	Fabaceae	Medicago	truncatula	TC	AJ500158 1 [Medicago truncatula 9] AJ500158 similar to UniRef100_Q43414 Cluster: Proline rich protein; n=1; Cicer arietinum|Rep: Proline rich protein - Cicer arietinum (Chickpea) (Garbanzo), partial (43%)			121	PVYKPPVEKP	10	6.3	0	62
3	Fabaceae	Medicago	truncatula	TC	BI309103 2 [Medicago truncatula 9] BI309103 similar to UniRef100_Q40376 Cluster: Nodulin precursor; n=1; Medicago truncatula|Rep: Nodulin precursor - Medicago truncatula (Barrel medic), partial (38%)			221	PVYKPPVEKP	10	19.5	26	220
3	Fabaceae	Phaseolus	coccineus	TC	TC15211 1 [Phaseolus coccineus 1] TC15211 homologue to UniRef100_Q40375 Cluster: Repetitive proline-rich cell wall protein 2 precursor; n=1; Medicago truncatula|Rep: Repetitive proline-rich cell wall protein 2 precursor - Medicago truncatula (Barrel medic), partial (50%)			203	PVYKPPVEKP	10	6.3	34	96
3	Fabaceae	Phaseolus	coccineus	TC	TC15211 1 [Phaseolus coccineus 1] TC15211 homologue to UniRef100_Q40375 Cluster: Repetitive proline-rich cell wall protein 2 precursor; n=1; Medicago truncatula|Rep: Repetitive proline-rich cell wall protein 2 precursor - Medicago truncatula (Barrel medic), partial (50%)			203	PVYKPPVEKP	10	5.9	34	92
3	Fabaceae	Phaseolus	vulgaris	TC	TC12917 1 [Phaseolus vulgaris 3] TC12917 homologue to UniRef100_Q40375 Cluster: Repetitive proline-rich cell wall protein 2 precursor; n=1; Medicago truncatula|Rep: Repetitive proline-rich cell wall protein 2 precursor - Medicago truncatula (Barrel medic), partial (57%)			261	PVYKPPVEKP	10	16.9	21	189
3	Fabaceae	Phaseolus	vulgaris	TC	TC13490 2 [Phaseolus vulgaris 3] TC13490 homologue to UniRef100_Q40375 Cluster: Repetitive proline-rich cell wall protein 2 precursor; n=1; Medicago truncatula|Rep: Repetitive proline-rich cell wall protein 2 precursor - Medicago truncatula (Barrel medic), partial (53%)			218	PVYKPPVEKP	10	15.9	22	180
3	Fabaceae	Phaseolus	vulgaris	TC	TC13690 2 [Phaseolus vulgaris 3] TC13690 homologue to UniRef100_Q40375 Cluster: Repetitive proline-rich cell wall protein 2 precursor; n=1; Medicago truncatula|Rep: Repetitive proline-rich cell wall protein 2 precursor - Medicago truncatula (Barrel medic), partial (63%)			378	PVYKPPVEKP	10	22.3	27	249
3	Fabaceae	Phaseolus	vulgaris	TC	TC14337 2 [Phaseolus vulgaris 3] TC14337 homologue to UniRef100_P13993 Cluster: Repetitive proline-rich cell wall protein 2 precursor; n=1; Glycine max|Rep: Repetitive proline-rich cell wall protein 2 precursor - Glycine max (Soybean), partial (73%)			270	PVYKPPVEKP	10	16.1	0	160
3	Fabaceae	Phaseolus	vulgaris	TC	TC17089 2 [Phaseolus vulgaris 3] TC17089 similar to UniRef100_Q40375 Cluster: Repetitive proline-rich cell wall protein 2 precursor; n=1; Medicago truncatula|Rep: Repetitive proline-rich cell wall protein 2 precursor - Medicago truncatula (Barrel medic), partial (51%)			193	PVYKPPVEKP	10	7.3	0	72
3	Fabaceae	Phaseolus	vulgaris	TC	TC17465 2 [Phaseolus vulgaris 3] TC17465 homologue to UniRef100_P13993 Cluster: Repetitive proline-rich cell wall protein 2 precursor; n=1; Glycine max|Rep: Repetitive proline-rich cell wall protein 2 precursor - Glycine max (Soybean), partial (37%)			252	PVYKPPVEKP	10	5.3	21	73
3	Fabaceae	Phaseolus	vulgaris	TC	TC14337 2 [Phaseolus vulgaris 3] TC14337 homologue to UniRef100_P13993 Cluster: Repetitive proline-rich cell wall protein 2 precursor; n=1; Glycine max|Rep: Repetitive proline-rich cell wall protein 2 precursor - Glycine max (Soybean), partial (73%)			270	PVYKPPVEKP	10	15.3	0	152
3	Fabaceae	Phaseolus	vulgaris	TC	TC18112 1 [Phaseolus vulgaris 3] TC18112 homologue to UniRef100_P13993 Cluster: Repetitive proline-rich cell wall protein 2 precursor; n=1; Glycine max|Rep: Repetitive proline-rich cell wall protein 2 precursor - Glycine max (Soybean), partial (54%)			178	PVYKPPVEKP	10	10.3	18	120
3	Fabaceae	Phaseolus	vulgaris	TC	TC19597 2 [Phaseolus vulgaris 3] TC19597 similar to UniRef100_P13993 Cluster: Repetitive proline-rich cell wall protein 2 precursor; n=1; Glycine max|Rep: Repetitive proline-rich cell wall protein 2 precursor - Glycine max (Soybean), partial (71%)			189	PVYKPPVEKP	10	5.4	15	68
3	Orobanchaceae	Triphysaria	pusilla	TC	TC11693 1 [Triphysaria pusilla NoSp] TC11693 homologue to UniRef100_P13993 Cluster: Repetitive proline-rich cell wall protein 2 precursor; n=1; Glycine max|Rep: Repetitive proline-rich cell wall protein 2 precursor - Glycine max (Soybean), partial (50%)			162	PVYKPPVEKP	10	9.7	26	122
3	Orobanchaceae	Triphysaria	pusilla	TC	TC8313 1 [Triphysaria pusilla NoSp] TC8313 homologue to UniRef100_Q40375 Cluster: Repetitive proline-rich cell wall protein 2 precursor; n=1; Medicago truncatula|Rep: Repetitive proline-rich cell wall protein 2 precursor - Medicago truncatula (Barrel medic), partial (21%)			263	PVYKPPVEKP	10	8.3	178	262
3	Orobanchaceae	Triphysaria	pusilla	TC	TC9426 3 [Triphysaria pusilla NoSp] TC9426 similar to UniRef100_Q40375 Cluster: Repetitive proline-rich cell wall protein 2 precursor; n=1; Medicago truncatula|Rep: Repetitive proline-rich cell wall protein 2 precursor - Medicago truncatula (Barrel medic), partial (47%)			581	PVYKPPVEKP	10	16	276	435
3	Orobanchaceae	Triphysaria	pusilla	TC	TC12026 3 [Triphysaria pusilla NoSp] TC12026 homologue to UniRef100_Q40375 Cluster: Repetitive proline-rich cell wall protein 2 precursor; n=1; Medicago truncatula|Rep: Repetitive proline-rich cell wall protein 2 precursor - Medicago truncatula (Barrel medic), partial (50%)			288	PVYKPPVEKP	10	20	58	258
3	Orobanchaceae	Triphysaria	versicolor	TC	TC5197 1 [Triphysaria versicolor 2] TC5197 homologue to UniRef100_P13993 Cluster: Repetitive proline-rich cell wall protein 2 precursor; n=1; Glycine max|Rep: Repetitive proline-rich cell wall protein 2 precursor - Glycine max (Soybean), partial (50%)			162	PVYKPPVEKP	10	9.7	26	122
3	Orobanchaceae	Triphysaria	versicolor	TC	TC3293 1 [Triphysaria versicolor 2] TC3293 homologue to UniRef100_Q40375 Cluster: Repetitive proline-rich cell wall protein 2 precursor; n=1; Medicago truncatula|Rep: Repetitive proline-rich cell wall protein 2 precursor - Medicago truncatula (Barrel medic), partial (21%)			263	PVYKPPVEKP	10	8.3	178	262
3	Orobanchaceae	Triphysaria	versicolor	TC	TC5422 3 [Triphysaria versicolor 2] TC5422 homologue to UniRef100_Q40375 Cluster: Repetitive proline-rich cell wall protein 2 precursor; n=1; Medicago truncatula|Rep: Repetitive proline-rich cell wall protein 2 precursor - Medicago truncatula (Barrel medic), partial (50%)			288	PVYKPPVEKP	10	20	58	258
3	Fabaceae	Glycine	soja	TA	TA2708_3848 1 [Glycine soja release] TA2708_3848 Nodulin precursor [Medicago truncatula (Barrel medic)]			226	PVYKPPVEKP	10	13.6	0	135
3	Fabaceae	Pisum	sativum	TA	AJ233399 1 [Pisum sativum release] AJ233399 Nodulin precursor [Medicago truncatula (Barrel medic)]			275	PVYKPPVEKP	10	3.4	28	61
3	Fabaceae	Trifolium	pratense	TA	BB937064 1 [Trifolium pratense release] BB937064 Nodulin precursor [Medicago truncatula (Barrel medic)]			113	PVYKPPVEKP	10	6.2	0	63
3	Fabaceae	Cicer	arietinum	TA	X97354 3 [Cicer arietinum release] X97354 Nodulin precursor [Medicago truncatula (Barrel medic)]			290	PVYKPPVEKP	10	20.1	0	200
3	Fabaceae	Cicer	arietinum	TA	X97354 3 [Cicer arietinum release] X97354 Nodulin precursor [Medicago truncatula (Barrel medic)]			290	PVYKPPVEKP	10	19.3	0	192
3	Fabaceae	Glycine	max	TC	TC300896 3 [Glycine max 14] TC300896 homologue to UniRef100_P13993 Cluster: Repetitive proline-rich cell wall protein 2 precursor; n=1; Glycine max|Rep: Repetitive proline-rich cell wall protein 2 precursor - Glycine max (Soybean), partial (63%)			227	PIYKPPVEKP	10	2.8	20	47
3	Fabaceae	Glycine	max	TC	TC327835 3 [Glycine max 14] TC327835 homologue to UniRef100_P08012 Cluster: Repetitive proline-rich cell wall protein 1 precursor; n=1; Glycine max|Rep: Repetitive proline-rich cell wall protein 1 precursor - Glycine max (Soybean), partial (52%)			137	PIYKPPVEKP	10	2.5	111	135
3	Fabaceae	Medicago	truncatula	TC	AW207938 3 [Medicago truncatula 9] AW207938 similar to UniRef100_Q40358 Cluster: Repetitive proline-rich cell wall protein precursor; n=1; Medicago sativa|Rep: Repetitive proline-rich cell wall protein precursor - Medicago sativa (Alfalfa), partial (51%)			124	PIYKPPVEKP	10	9.4	27	120
3	Fabaceae	Medicago	truncatula	TC	BQ143991 1 [Medicago truncatula 9] BQ143991 similar to UniRef100_Q43414 Cluster: Proline rich protein; n=1; Cicer arietinum|Rep: Proline rich protein - Cicer arietinum (Chickpea) (Garbanzo), partial (45%)			245	PIEKPPVYKP	10	2.5	156	180
3	Salicaceae	Populus	trichocarpa	TC	TC93376 3 [Populus trichocarpa NoSp] TC93376 homologue to UniRef100_Q43414 Cluster: Proline rich protein; n=1; Cicer arietinum|Rep: Proline rich protein - Cicer arietinum (Chickpea) (Garbanzo), partial (37%)			251	PIEKPPVYKP	10	8.1	48	132
3	Salicaceae	Populus	trichocarpa	TC	TC95045 3 [Populus trichocarpa NoSp] TC95045 homologue to UniRef100_Q43414 Cluster: Proline rich protein; n=1; Cicer arietinum|Rep: Proline rich protein - Cicer arietinum (Chickpea) (Garbanzo), partial (44%)			271	PIEKPPVYKP	10	9.6	54	152
3	Salicaceae	Populus	trichocarpa	TC	TC105229 1 [Populus trichocarpa NoSp] TC105229 homologue to UniRef100_Q43414 Cluster: Proline rich protein; n=1; Cicer arietinum|Rep: Proline rich protein - Cicer arietinum (Chickpea) (Garbanzo), partial (44%)			192	PIEKPPVYKP	10	10.6	51	160
3	Salicaceae	Populus	trichocarpa	TC	TC117887 3 [Populus trichocarpa NoSp] TC117887 homologue to UniRef100_Q43414 Cluster: Proline rich protein; n=1; Cicer arietinum|Rep: Proline rich protein - Cicer arietinum (Chickpea) (Garbanzo), partial (33%)			221	PIEKPPVYKP	10	7.8	9	89
3	Salicaceae	Populus	trichocarpa	TC	BU867546 1 [Populus trichocarpa NoSp] BU867546 homologue to UniRef100_P13993 Cluster: Repetitive proline-rich cell wall protein 2 precursor; n=1; Glycine max|Rep: Repetitive proline-rich cell wall protein 2 precursor - Glycine max (Soybean), partial (33%)			129	PIEKPPVYKP	10	2.6	103	128
3	Pinaceae	Picea	glauca	TC	TC60724 2 [Picea glauca NoSp] TC60724 similar to UniRef100_Q9MAW3 Cluster: TrPRP2; n=1; Trifolium repens|Rep: TrPRP2 - Trifolium repens (Creeping white clover), partial (35%)			479	PVYKPPIKPP	10	10	71	171
3	Pinaceae	Picea	glauca	TC	TC78072 2 [Picea glauca NoSp] TC78072 similar to UniRef100_Q40375 Cluster: Repetitive proline-rich cell wall protein 2 precursor; n=1; Medicago truncatula|Rep: Repetitive proline-rich cell wall protein 2 precursor - Medicago truncatula (Barrel medic), partial (40%)			441	PVYKPPIKPP	10	11.3	90	202
3	Pinaceae	Picea	glauca	TC	TC83234 3 [Picea glauca NoSp] TC83234 UniRef100_Q5ME78 Cluster: Translation elongation factor-1 alpha; n=3; Pinaceae|Rep: Translation elongation factor-1 alpha - Pseudotsuga menziesii (Douglas-fir), partial (36%)			494	PVYKPPIKPP	10	5.6	2	57
3	Pinaceae	Picea	glauca	TC	FD735363 3 [Picea glauca NoSp] FD735363			291	PVYKPPIKPP	10	7.2	0	71
3	Pinaceae	Pinus	taeda	TC	TC88474 2 [Pinus taeda NoSp] TC88474 similar to UniRef100_Q9FUR6 Cluster: ENOD2; n=1; Cladrastis kentukea|Rep: ENOD2 - Cladrastis lutea (Yellow wood), partial (67%)			348	PVYKPPIKPP	10	7.5	120	194
3	Pinaceae	Pinus	taeda	TC	TC93219 2 [Pinus taeda NoSp] TC93219 similar to UniRef100_Q9MAW3 Cluster: TrPRP2; n=1; Trifolium repens|Rep: TrPRP2 - Trifolium repens (Creeping white clover), partial (62%)			714	PVYKPPIKPP	10	9.5	123	217
3	Pinaceae	Pinus	taeda	TC	TC102075 3 [Pinus taeda NoSp] TC102075 similar to UniRef100_Q9FUR6 Cluster: ENOD2; n=1; Cladrastis kentukea|Rep: ENOD2 - Cladrastis lutea (Yellow wood), partial (43%)			282	PVYKPPIKPP	10	7.5	121	195
3	Brassicaceae	Arabidopsis	thaliana	TC	TC323043 1 [Arabidopsis thaliana 14] TC323043 UniRef100_Q9M7P1 Cluster: Proline-rich protein 1; n=1; Arabidopsis thaliana|Rep: Proline-rich protein 1 - Arabidopsis thaliana (Mouse-ear cress), complete	AT1G54970	PRP1	338	PTLSPPVYTK	10	8.4	97	180
3	Fabaceae	Medicago	truncatula	TC	TC119668 1 [Medicago truncatula 9] TC119668 similar to UniRef100_Q40376 Cluster: Nodulin precursor; n=1; Medicago truncatula|Rep: Nodulin precursor - Medicago truncatula (Barrel medic), partial (66%)			370	PVHKPPVEKP	10	32	50	369
3	Fabaceae	Medicago	truncatula	TC	TC124554 3 [Medicago truncatula 9] TC124554 homologue to UniRef100_Q40376 Cluster: Nodulin precursor; n=1; Medicago truncatula|Rep: Nodulin precursor - Medicago truncatula (Barrel medic), partial (52%)			307	PVHKPPVEKP	10	17.8	61	238
3	Fabaceae	Medicago	truncatula	TC	TC131355 2 [Medicago truncatula 9] TC131355 similar to UniRef100_Q40376 Cluster: Nodulin precursor; n=1; Medicago truncatula|Rep: Nodulin precursor - Medicago truncatula (Barrel medic), partial (53%)			295	PVHKPPVEKP	10	13.8	157	294
3	Fabaceae	Medicago	truncatula	TC	TC135966 1 [Medicago truncatula 9] TC135966 homologue to UniRef100_Q40376 Cluster: Nodulin precursor; n=1; Medicago truncatula|Rep: Nodulin precursor - Medicago truncatula (Barrel medic), partial (42%)			237	PVHKPPVEKP	10	20.4	0	203
3	Fabaceae	Medicago	truncatula	TC	TC135966 1 [Medicago truncatula 9] TC135966 homologue to UniRef100_Q40376 Cluster: Nodulin precursor; n=1; Medicago truncatula|Rep: Nodulin precursor - Medicago truncatula (Barrel medic), partial (42%)			237	PVHKPPVEKP	10	20.2	0	201
3	Fabaceae	Medicago	truncatula	TC	TC137516 1 [Medicago truncatula 9] TC137516 homologue to UniRef100_Q40376 Cluster: Nodulin precursor; n=1; Medicago truncatula|Rep: Nodulin precursor - Medicago truncatula (Barrel medic), partial (92%)			716	PVHKPPVEKP	10	22.9	332	560
3	Fabaceae	Medicago	truncatula	TC	TC137516 1 [Medicago truncatula 9] TC137516 homologue to UniRef100_Q40376 Cluster: Nodulin precursor; n=1; Medicago truncatula|Rep: Nodulin precursor - Medicago truncatula (Barrel medic), partial (92%)			716	PVHKPPVEKP	10	8.8	564	651
3	Fabaceae	Medicago	truncatula	TC	BI309622 2 [Medicago truncatula 9] BI309622 homologue to UniRef100_Q40376 Cluster: Nodulin precursor; n=1; Medicago truncatula|Rep: Nodulin precursor - Medicago truncatula (Barrel medic), partial (47%)			268	PVHKPPVEKP	10	22.7	41	267
3	Fabaceae	Medicago	truncatula	TC	CA916820 1 [Medicago truncatula 9] CA916820 similar to UniRef100_Q40376 Cluster: Nodulin precursor; n=1; Medicago truncatula|Rep: Nodulin precursor - Medicago truncatula (Barrel medic), partial (44%)			256	PVHKPPVEKP	10	14.3	52	194
3	Brassicaceae	Arabidopsis	thaliana	NR	gi|15221949|ref|NP_175895.1| ATPRP1 (PROLINE-RICH PROTEIN 1); structural constituent of cell wall [Arabidopsis thaliana] gi|9857527|gb|AAG00882.1|AC064840_13 proline-rich protein 1 [Arabidopsis thaliana] gi|12322156|gb|AAG51112.1|AC069144_9 proline-rich protein, putative [Arabidopsis thaliana]	AT1G54970	PRP1	335	PTLSPPVYTK	10	8.4	97	180
3	Brassicaceae	Arabidopsis	thaliana	NR	gi|7620009|gb|AAF64548.1|AF110985_1 proline-rich protein 1 [Arabidopsis thaliana]	AT1G54970	PRP1	335	PTLSPPVYTK	10	8.4	97	180
3	Fabaceae	Cicer	arietinum	NR	gi|1279233|emb|CAA66038.1| proline rich protein [Cicer arietinum]			227	PVYKPPVEKP	10	20.1	0	200
3	Fabaceae	Cicer	arietinum	NR	gi|1279233|emb|CAA66038.1| proline rich protein [Cicer arietinum]			227	PVYKPPVEKP	10	19.3	0	192
3	Fabaceae	Pisum	sativum	NR	gi|6580688|emb|CAB63486.1| proline-rich protein [Pisum sativum]			214	PVYKPPVEKP	10	3.4	23	56
3	Fabaceae	Glycine	max	NR	gi|131001|sp|P13993.1|PRP2_SOYBN RecName: Full=Repetitive proline-rich cell wall protein 2; Flags: Precursor gi|4261542|gb|AAD13836.1|S44202_1 repetitive proline-rich protein [Glycine max] gi|18738|emb|CAA34593.1| unnamed protein product [Glycine max] gi|170066|gb|AAA34011.1| cell wall protein (SbPRP2) precursor gi|255633186|gb|ACU16949.1| unknown [Glycine max]			230	PVYKPPVEKP	10	19.8	26	223
3	Fabaceae	Glycine	max	NR	gi|131001|sp|P13993.1|PRP2_SOYBN RecName: Full=Repetitive proline-rich cell wall protein 2; Flags: Precursor gi|4261542|gb|AAD13836.1|S44202_1 repetitive proline-rich protein [Glycine max] gi|18738|emb|CAA34593.1| unnamed protein product [Glycine max] gi|170066|gb|AAA34011.1| cell wall protein (SbPRP2) precursor gi|255633186|gb|ACU16949.1| unknown [Glycine max]			230	PVYKPPVEKP	10	18.9	24	212
3	Fabaceae	Phaseolus	vulgaris	NR	gi|82581111|emb|CAJ43592.1| proline-rich protein precursor [Phaseolus vulgaris]			264	PVYKPPVEKP	10	22.3	27	249
3	Fabaceae	Phaseolus	vulgaris	NR	gi|2347094|gb|AAC49863.1| cell wall type 2 proline rich protein PvPRP2-37 [Phaseolus vulgaris]			81	PVYKPPVEKP	10	8.1	0	80
3	Salicaceae	Populus	trichocarpa	NR	gi|224107867|ref|XP_002314633.1| predicted protein [Populus trichocarpa] gi|118485688|gb|ABK94694.1| unknown [Populus trichocarpa] gi|222863673|gb|EEF00804.1| predicted protein [Populus trichocarpa]			182	PIEKPPVYKP	10	9.6	49	147
3	Pinaceae	Pinus	taeda	TC	TC88474 2 [Pinus taeda NoSp] TC88474 similar to UniRef100_Q9FUR6 Cluster: ENOD2; n=1; Cladrastis kentukea|Rep: ENOD2 - Cladrastis lutea (Yellow wood), partial (67%)			348	PVIPPPVIKPP	11	2.73	49	78
3	Pinaceae	Pinus	taeda	TC	TC93219 2 [Pinus taeda NoSp] TC93219 similar to UniRef100_Q9MAW3 Cluster: TrPRP2; n=1; Trifolium repens|Rep: TrPRP2 - Trifolium repens (Creeping white clover), partial (62%)			714	PVIPPPVIKPP	11	2.73	52	81
3	Pinaceae	Pinus	taeda	TC	TC102075 3 [Pinus taeda NoSp] TC102075 similar to UniRef100_Q9FUR6 Cluster: ENOD2; n=1; Cladrastis kentukea|Rep: ENOD2 - Cladrastis lutea (Yellow wood), partial (43%)			282	PVIPPPVIKPP	11	2.73	50	79
3	Pinaceae	Pinus	taeda	TC	DR049466 2 [Pinus taeda NoSp] DR049466 weakly similar to UniRef100_Q9FUR6 Cluster: ENOD2; n=1; Cladrastis kentukea|Rep: ENOD2 - Cladrastis lutea (Yellow wood), partial (30%)			226	PVIPPPVIKPP	11	4.82	48	102
3	Pinaceae	Pinus	taeda	TC	DR386972 1 [Pinus taeda NoSp] DR386972 weakly similar to UniRef100_Q9FUR7 Cluster: ENOD2; n=1; Styphnolobium japonicum|Rep: ENOD2 - Sophora japonica (Japanese pagoda tree), partial (14%)			221	PVIPPPVIKPP	11	2.73	40	69
3	Malvaceae	Gossypium	hirsutum	TC	TC160806 1 [Gossypium hirsutum NoSp] TC160806 similar to UniRef100_Q9M6T6 Cluster: Proline-rich protein; n=1; Arabidopsis thaliana|Rep: Proline-rich protein - Arabidopsis thaliana (Mouse-ear cress), partial (19%)			235	PVYKKPLPPPV	11	7.09	0	77
3	Rosaceae	Malus	domestica	TC	TC35233 2 [Malus domestica x] TC35233			291	PVYKKPLPPPV	11	5.09	33	88
3	Malvaceae	Theobroma	cacao	TC	TC5091 2 [Theobroma cacao 3] TC5091			196	PVYKKPLPPPV	11	3.91	81	125
3	Malvaceae	Theobroma	cacao	TC	TC16026 3 [Theobroma cacao 3] TC16026 similar to UniRef100_O82066 Cluster: Proline-rich protein; n=1; Solanum tuberosum|Rep: Proline-rich protein - Solanum tuberosum (Potato), partial (46%)			445	PVYKKPLPPPV	11	12.18	222	361
3	Vitaceae	Vitis	vinifera	TC	TC73302 2 [Vitis vinifera 6] TC73302 homologue to UniRef100_A7P866 Cluster: Chromosome chr3 scaffold_8, whole genome shotgun sequence; n=1; Vitis vinifera|Rep: Chromosome chr3 scaffold_8, whole genome shotgun sequence - Vitis vinifera (Grape), partial (49%)			369	PVYKKPLPPPV	11	12.09	53	185
3	Vitaceae	Vitis	vinifera	TC	TC98581 1 [Vitis vinifera 6] TC98581 homologue to UniRef100_A7P866 Cluster: Chromosome chr3 scaffold_8, whole genome shotgun sequence; n=1; Vitis vinifera|Rep: Chromosome chr3 scaffold_8, whole genome shotgun sequence - Vitis vinifera (Grape), partial (93%)			1288	PVYKKPLPPPV	11	18.18	269	468
3	Vitaceae	Vitis	vinifera	TC	TC101721 3 [Vitis vinifera 6] TC101721 UniRef100_A7P866 Cluster: Chromosome chr3 scaffold_8, whole genome shotgun sequence; n=1; Vitis vinifera|Rep: Chromosome chr3 scaffold_8, whole genome shotgun sequence - Vitis vinifera (Grape), partial (24%)			586	PVYKKPLPPPV	11	2.91	229	260
3	Vitaceae	Vitis	vinifera	TC	EV242646 3 [Vitis vinifera 6] EV242646			365	PVYKKPLPPPV	11	15.09	101	266
3	Cucurbitaceae	Cucumis	sativus	TA	CV004499 1 [Cucumis sativus release] CV004499			152	PVYKKPLPPPV	11	4.73	0	51
3	Rosaceae	Fragaria	vesca	TA	TA3784_57918 2 [Fragaria vesca release] TA3784_57918 Proline-rich protein [Nicotiana glauca (Glaucous tobacco) (Tree tobacco)]			275	PVYKKPLPPPV	11	3.09	240	273
3	Rosaceae	Rosa	hybrid	TA	TA657_128735 1 [Rosa hybrid cultivar] TA657_128735			292	PVYKKPLPPPV	11	10	6	115
3	Vitaceae	Vitis	shuttleworthii	TA	TA1723_246827 1 [Vitis shuttleworthii release] TA1723_246827			593	PVYKKPLPPPV	11	15.18	252	418
3	Vitaceae	Vitis	shuttleworthii	TA	CV092491 2 [Vitis shuttleworthii release] CV092491			69	PVYKKPLPPPV	11	4.45	20	68
3	Vitaceae	Vitis	vinifera	TC	TC73386 1 [Vitis vinifera 6] TC73386 similar to UniRef100_A7NX90 Cluster: Chromosome chr5 scaffold_2, whole genome shotgun sequence; n=1; Vitis vinifera|Rep: Chromosome chr5 scaffold_2, whole genome shotgun sequence - Vitis vinifera (Grape), partial (87%)			392	PEHKPPVEKPP	11	18.91	31	238
3	Vitaceae	Vitis	vinifera	TC	TC76633 2 [Vitis vinifera 6] TC76633 homologue to UniRef100_Q8LGR5 Cluster: Proline rich protein 2; n=1; Vitis vinifera|Rep: Proline rich protein 2 - Vitis vinifera (Grape), partial (85%)			262	PEHKPPVEKPP	11	4.91	28	82
3	Vitaceae	Vitis	vinifera	TC	TC78649 1 [Vitis vinifera 6] TC78649 homologue to UniRef100_Q8LGR5 Cluster: Proline rich protein 2; n=1; Vitis vinifera|Rep: Proline rich protein 2 - Vitis vinifera (Grape), partial (85%)			248	PEHKPPVEKPP	11	5.73	29	91
3	Vitaceae	Vitis	vinifera	TC	TC78739 3 [Vitis vinifera 6] TC78739 homologue to UniRef100_Q8LGR5 Cluster: Proline rich protein 2; n=1; Vitis vinifera|Rep: Proline rich protein 2 - Vitis vinifera (Grape), partial (86%)			251	PEHKPPVEKPP	11	4.36	33	81
3	Vitaceae	Vitis	vinifera	TC	TC83678 3 [Vitis vinifera 6] TC83678 homologue to UniRef100_A7NX90 Cluster: Chromosome chr5 scaffold_2, whole genome shotgun sequence; n=1; Vitis vinifera|Rep: Chromosome chr5 scaffold_2, whole genome shotgun sequence - Vitis vinifera (Grape), partial (78%)			417	PEHKPPVEKPP	11	19.64	33	248
3	Vitaceae	Vitis	vinifera	TC	TC73386 1 [Vitis vinifera 6] TC73386 similar to UniRef100_A7NX90 Cluster: Chromosome chr5 scaffold_2, whole genome shotgun sequence; n=1; Vitis vinifera|Rep: Chromosome chr5 scaffold_2, whole genome shotgun sequence - Vitis vinifera (Grape), partial (87%)			392	PEHKPPVEKPP	11	18.27	34	234
3	Vitaceae	Vitis	vinifera	TC	TC87881 1 [Vitis vinifera 6] TC87881 homologue to UniRef100_Q8LGR5 Cluster: Proline rich protein 2; n=1; Vitis vinifera|Rep: Proline rich protein 2 - Vitis vinifera (Grape), partial (74%)			245	PEHKPPVEKPP	11	3.36	11	48
3	Vitaceae	Vitis	vinifera	TC	TC91522 2 [Vitis vinifera 6] TC91522 homologue to UniRef100_Q8LGR5 Cluster: Proline rich protein 2; n=1; Vitis vinifera|Rep: Proline rich protein 2 - Vitis vinifera (Grape), partial (91%)			248	PEHKPPVEKPP	11	5.27	37	95
3	Vitaceae	Vitis	vinifera	TC	TC92378 1 [Vitis vinifera 6] TC92378 homologue to UniRef100_Q8LGR5 Cluster: Proline rich protein 2; n=1; Vitis vinifera|Rep: Proline rich protein 2 - Vitis vinifera (Grape), partial (66%)			173	PEHKPPVEKPP	11	5.36	40	99
3	Vitaceae	Vitis	vinifera	TC	TC94116 1 [Vitis vinifera 6] TC94116			209	PEHKPPVEKPP	11	2.18	31	54
3	Vitaceae	Vitis	vinifera	TC	TC96944 3 [Vitis vinifera 6] TC96944 homologue to UniRef100_Q8LGR5 Cluster: Proline rich protein 2; n=1; Vitis vinifera|Rep: Proline rich protein 2 - Vitis vinifera (Grape), partial (72%)			211	PEHKPPVEKPP	11	4.36	27	75
3	Vitaceae	Vitis	vinifera	TC	TC91029 3 [Vitis vinifera 6] TC91029 homologue to UniRef100_Q8LGR5 Cluster: Proline rich protein 2; n=1; Vitis vinifera|Rep: Proline rich protein 2 - Vitis vinifera (Grape), partial (73%)			220	PEHKPPVEKPP	11	2.36	0	25
3	Vitaceae	Vitis	vinifera	TC	NP9523853 1 [Vitis vinifera 6] NP9523853 GB|AM475616.2|CAN83722.1 hypothetical protein			144	PEHKPPVEKPP	11	4.18	13	59
3	Vitaceae	Vitis	vinifera	TC	EC951043 2 [Vitis vinifera 6] EC951043			203	PEHKPPVEKPP	11	4.91	25	79
3	Vitaceae	Vitis	vinifera	TC	FC063117 1 [Vitis vinifera 6] FC063117			114	PEHKPPVEKPP	11	5.27	18	76
3	Vitaceae	Vitis	aestivalis	TA	TA306_3605 1 [Vitis aestivalis release] TA306_3605 Merlot proline-rich protein 2 [Vitis vinifera (Grape)]			201	PEHKPPVEKPP	11	14.82	38	200
3	Vitaceae	Vitis	aestivalis	TA	TA306_3605 1 [Vitis aestivalis release] TA306_3605 Merlot proline-rich protein 2 [Vitis vinifera (Grape)]			201	PEHKPPVEKPP	11	14.27	41	197
3	Vitaceae	Vitis	aestivalis	TA	TA307_3605 2 [Vitis aestivalis release] TA307_3605 Merlot proline-rich protein 2 [Vitis vinifera (Grape)]			265	PEHKPPVEKPP	11	11	3	124
3	Vitaceae	Vitis	aestivalis	TA	CB074676 3 [Vitis aestivalis release] CB074676 Merlot proline-rich protein 2 [Vitis vinifera (Grape)]			183	PEHKPPVEKPP	11	11.91	21	151
3	Vitaceae	Vitis	aestivalis	TA	CB074676 3 [Vitis aestivalis release] CB074676 Merlot proline-rich protein 2 [Vitis vinifera (Grape)]			183	PEHKPPVEKPP	11	6.73	72	145
3	Vitaceae	Vitis	aestivalis	TA	CB288675 3 [Vitis aestivalis release] CB288675 Merlot proline-rich protein 2 [Vitis vinifera (Grape)]			230	PEHKPPVEKPP	11	18.18	30	229
3	Vitaceae	Vitis	hybrid	TA	CF201982 1 [Vitis hybrid cultivar] CF201982			239	PEHKPPVEKPP	11	2.18	38	61
3	Vitaceae	Vitis	riparia	TA	CK317674 3 [Vitis riparia release] CK317674 Merlot proline-rich protein 2 [Vitis vinifera (Grape)]			246	PEHKPPVEKPP	11	14	0	153
3	Vitaceae	Vitis	riparia	TA	CK317675 3 [Vitis riparia release] CK317675 Merlot proline-rich protein 2 [Vitis vinifera (Grape)]			237	PEHKPPVEKPP	11	18.27	33	233
3	Vitaceae	Vitis	riparia	TA	CK317675 3 [Vitis riparia release] CK317675 Merlot proline-rich protein 2 [Vitis vinifera (Grape)]			237	PEHKPPVEKPP	11	18	34	231
3	Vitaceae	Vitis	shuttleworthii	TA	CV093372 3 [Vitis shuttleworthii release] CV093372 Merlot proline-rich protein 2 [Vitis vinifera (Grape)]			156	PEHKPPVEKPP	11	11	0	121
3	Vitaceae	Vitis	shuttleworthii	TA	CV093372 3 [Vitis shuttleworthii release] CV093372 Merlot proline-rich protein 2 [Vitis vinifera (Grape)]			156	PEHKPPVEKPP	11	10.45	0	114
3	Vitaceae	Vitis	shuttleworthii	TA	CV095392 3 [Vitis shuttleworthii release] CV095392 Merlot proline-rich protein 2 [Vitis vinifera (Grape)]			233	PEHKPPVEKPP	11	9.18	0	100
3	Vitaceae	Vitis	shuttleworthii	TA	CV095392 3 [Vitis shuttleworthii release] CV095392 Merlot proline-rich protein 2 [Vitis vinifera (Grape)]			233	PEHKPPVEKPP	11	7.91	0	86
3	Salicaceae	Populus	trichocarpa	TC	TC94858 3 [Populus trichocarpa NoSp] TC94858 homologue to UniRef100_Q43414 Cluster: Proline rich protein; n=1; Cicer arietinum|Rep: Proline rich protein - Cicer arietinum (Chickpea) (Garbanzo), partial (33%)			257	KIEKPPVYKPP	11	8.27	54	144
3	Salicaceae	Populus	trichocarpa	TC	TC96663 1 [Populus trichocarpa NoSp] TC96663 UniRef100_Q43414 Cluster: Proline rich protein; n=1; Cicer arietinum|Rep: Proline rich protein - Cicer arietinum (Chickpea) (Garbanzo), partial (41%)			242	KIEKPPVYKPP	11	10.27	49	161
3	Salicaceae	Populus	trichocarpa	TC	TC98448 2 [Populus trichocarpa NoSp] TC98448 UniRef100_Q43414 Cluster: Proline rich protein; n=1; Cicer arietinum|Rep: Proline rich protein - Cicer arietinum (Chickpea) (Garbanzo), partial (44%)			256	KIEKPPVYKPP	11	11.27	55	178
3	Salicaceae	Populus	trichocarpa	TC	TC96245 1 [Populus trichocarpa NoSp] TC96245			242	KIEKPPVYKPP	11	6.82	62	137
3	Salicaceae	Populus	trichocarpa	TC	TC103848 3 [Populus trichocarpa NoSp] TC103848 similar to UniRef100_Q39686 Cluster: Proline-rich protein; n=1; Daucus carota|Rep: Proline-rich protein - Daucus carota (Carrot), partial (25%)			220	KIEKPPVYKPP	11	4.27	34	80
3	Salicaceae	Populus	trichocarpa	TC	TC106063 1 [Populus trichocarpa NoSp] TC106063 similar to UniRef100_Q39686 Cluster: Proline-rich protein; n=1; Daucus carota|Rep: Proline-rich protein - Daucus carota (Carrot), partial (25%)			200	KIEKPPVYKPP	11	3.27	49	84
3	Salicaceae	Populus	trichocarpa	TC	TC109974 1 [Populus trichocarpa NoSp] TC109974 UniRef100_Q43414 Cluster: Proline rich protein; n=1; Cicer arietinum|Rep: Proline rich protein - Cicer arietinum (Chickpea) (Garbanzo), partial (37%)			235	KIEKPPVYKPP	11	9.27	55	156
3	Salicaceae	Populus	trichocarpa	TC	TC124374 2 [Populus trichocarpa NoSp] TC124374 weakly similar to UniRef100_Q9FUR6 Cluster: ENOD2; n=1; Cladrastis kentukea|Rep: ENOD2 - Cladrastis lutea (Yellow wood), partial (27%)			192	KIEKPPVYKPP	11	4.27	52	98
3	Salicaceae	Populus	trichocarpa	TC	TC132482 2 [Populus trichocarpa NoSp] TC132482 homologue to UniRef100_Q43414 Cluster: Proline rich protein; n=1; Cicer arietinum|Rep: Proline rich protein - Cicer arietinum (Chickpea) (Garbanzo), partial (33%)			263	KIEKPPVYKPP	11	7.64	67	150
3	Salicaceae	Populus	trichocarpa	TC	TC137645 3 [Populus trichocarpa NoSp] TC137645 weakly similar to UniRef100_Q9FUR6 Cluster: ENOD2; n=1; Cladrastis kentukea|Rep: ENOD2 - Cladrastis lutea (Yellow wood), partial (34%)			292	KIEKPPVYKPP	11	5.18	52	108
3	Salicaceae	Populus	trichocarpa	TC	AJ767744 3 [Populus trichocarpa NoSp] AJ767744 similar to UniRef100_Q39686 Cluster: Proline-rich protein; n=1; Daucus carota|Rep: Proline-rich protein - Daucus carota (Carrot), partial (20%)			179	KIEKPPVYKPP	11	2.27	50	74
3	Salicaceae	Populus	trichocarpa	TC	CK110740 3 [Populus trichocarpa NoSp] CK110740 UniRef100_Q43414 Cluster: Proline rich protein; n=1; Cicer arietinum|Rep: Proline rich protein - Cicer arietinum (Chickpea) (Garbanzo), partial (21%)			152	KIEKPPVYKPP	11	5.27	54	111
3	Salicaceae	Populus	euphratica	TA	TA2193_75702 1 [Populus euphratica release] TA2193_75702			200	KIEKPPVYKPP	11	3.27	49	84
3	Salicaceae	Populus	euphratica	TA	TA2194_75702 3 [Populus euphratica release] TA2194_75702			220	KIEKPPVYKPP	11	4.27	34	80
3	Salicaceae	Populus	euphratica	TA	TA2195_75702 1 [Populus euphratica release] TA2195_75702			242	KIEKPPVYKPP	11	6.82	62	137
3	Salicaceae	Populus	euphratica	TA	AJ767744 3 [Populus euphratica release] AJ767744			179	KIEKPPVYKPP	11	2.27	50	74
3	Salicaceae	Populus	tremula	TA	TA9026_113636 2 [Populus tremula release] TA9026_113636			229	KIEKPPVYKPP	11	9.27	29	130
3	Salicaceae	Populus	tremula	TA	CK110740 3 [Populus tremula release] CK110740			152	KIEKPPVYKPP	11	5.27	54	111
3	Salicaceae	Populus	tremula	TA	CK114945 2 [Populus tremula release] CK114945			180	KIEKPPVYKPP	11	11.27	42	165
3	Salicaceae	Populus	tremuloides	TA	CA925538 3 [Populus tremuloides release] CA925538			178	KIEKPPVYKPP	11	5.18	52	108
3	Salicaceae	Populus	x	TA	CX180672 1 [Populus x canadensis] CX180672			218	KIEKPPVYKPP	11	9.27	38	139
3	Vitaceae	Vitis	vinifera	NR	gi|147821777|emb|CAN77170.1| hypothetical protein [Vitis vinifera]			1190	PVYKKPLPPPV	11	18.18	269	468
3	Vitaceae	Vitis	vinifera	NR	gi|225433073|ref|XP_002285070.1| PREDICTED: hypothetical protein [Vitis vinifera]			329	PEHKPPVEKPP	11	20.64	30	256
3	Vitaceae	Vitis	vinifera	NR	gi|225433073|ref|XP_002285070.1| PREDICTED: hypothetical protein [Vitis vinifera]			329	PEHKPPVEKPP	11	11.73	37	165
3	Vitaceae	Vitis	vinifera	NR	gi|225433073|ref|XP_002285070.1| PREDICTED: hypothetical protein [Vitis vinifera]			329	PEHKPPVEKPP	11	5.91	180	244
3	Vitaceae	Vitis	vinifera	NR	gi|225433075|ref|XP_002285092.1| PREDICTED: hypothetical protein [Vitis vinifera]			157	PEHKPPVEKPP	11	2.18	31	54
3	Vitaceae	Vitis	vinifera	NR	gi|225433078|ref|XP_002285104.1| PREDICTED: hypothetical protein [Vitis vinifera]			306	PEHKPPVEKPP	11	9.18	31	135
3	Vitaceae	Vitis	vinifera	NR	gi|225433086|ref|XP_002281143.1| PREDICTED: hypothetical protein [Vitis vinifera]			158	PEHKPPVEKPP	11	2.18	31	54
3	Vitaceae	Vitis	vinifera	NR	gi|147805121|emb|CAN77866.1| hypothetical protein [Vitis vinifera]			157	PEHKPPVEKPP	11	2.18	31	54
3	Vitaceae	Vitis	vinifera	NR	gi|147835037|emb|CAN61377.1| hypothetical protein [Vitis vinifera]			157	PEHKPPVEKPP	11	2.18	31	54
3	Vitaceae	Vitis	vinifera	NR	gi|147843854|emb|CAN83722.1| hypothetical protein [Vitis vinifera]			143	PEHKPPVEKPP	11	4.18	13	59
3	Brassicaceae	Arabidopsis	thaliana	TC	TC315562 3 [Arabidopsis thaliana 14] TC315562 UniRef100_UPI000150568E Cluster: pollen Ole e 1 allergen and extensin family protein; n=1; Arabidopsis thaliana|Rep: pollen Ole e 1 allergen and extensin family protein - Arabidopsis thaliana, complete	AT1G28290	AGP31	439	PPTKPPVKPPVS	12	4.17	182	231
3	Brassicaceae	Arabidopsis	thaliana	TC	CB252938 3 [Arabidopsis thaliana 14] CB252938 similar to UniRef100_UPI000150568E Cluster: pollen Ole e 1 allergen and extensin family protein; n=1; Arabidopsis thaliana|Rep: pollen Ole e 1 allergen and extensin family protein - Arabidopsis thaliana, partial (70%)	AT1G28290	AGP31	220	PPTKPPVKPPVS	12	6.33	9	84
3	Brassicaceae	Arabidopsis	thaliana	TC	AV551131 3 [Arabidopsis thaliana 14] AV551131 similar to UniRef100_UPI000150568E Cluster: pollen Ole e 1 allergen and extensin family protein; n=1; Arabidopsis thaliana|Rep: pollen Ole e 1 allergen and extensin family protein - Arabidopsis thaliana, partial (33%)	AT1G28290	AGP31	104	PPTKPPVKPPVS	12	3.92	28	74
3	Brassicaceae	Arabidopsis	thaliana	TC	EH984824 3 [Arabidopsis thaliana 14] EH984824 homologue to UniRef100_UPI000150568E Cluster: pollen Ole e 1 allergen and extensin family protein; n=1; Arabidopsis thaliana|Rep: pollen Ole e 1 allergen and extensin family protein - Arabidopsis thaliana, partial (16%)	AT1G28290	AGP31	50	PPTKPPVKPPVS	12	4.17	0	49
3	Brassicaceae	Brassica	napus	TC	TC71449 1 [Brassica napus 3-1] TC71449 similar to UniRef100_UPI000150568E Cluster: pollen Ole e 1 allergen and extensin family protein; n=1; Arabidopsis thaliana|Rep: pollen Ole e 1 allergen and extensin family protein - Arabidopsis thaliana, complete			445	PPTKPPVKPPVS	12	4.92	74	132
3	Brassicaceae	Brassica	napus	TC	TC86196 2 [Brassica napus 3-1] TC86196 similar to UniRef100_UPI000150568E Cluster: pollen Ole e 1 allergen and extensin family protein; n=1; Arabidopsis thaliana|Rep: pollen Ole e 1 allergen and extensin family protein - Arabidopsis thaliana, complete			360	PPTKPPVKPPVS	12	4.92	68	126
3	Brassicaceae	Brassica	napus	TC	CX281741 1 [Brassica napus 3-1] CX281741 similar to UniRef100_UPI000150568E Cluster: pollen Ole e 1 allergen and extensin family protein; n=1; Arabidopsis thaliana|Rep: pollen Ole e 1 allergen and extensin family protein - Arabidopsis thaliana, partial (50%)			214	PPTKPPVKPPVS	12	7.25	70	156
3	Brassicaceae	Arabidopsis	thaliana	TC	AV551623 3 [Arabidopsis thaliana 14] AV551623 homologue to UniRef100_UPI000150568E Cluster: pollen Ole e 1 allergen and extensin family protein; n=1; Arabidopsis thaliana|Rep: pollen Ole e 1 allergen and extensin family protein - Arabidopsis thaliana, partial (50%)	AT1G28290	AGP31	158	PPAKPPVKPPVS	12	2.58	93	123
3	Brassicaceae	Arabidopsis	thaliana	TC	DR240269 3 [Arabidopsis thaliana 14] DR240269 UniRef100_UPI000150568E Cluster: pollen Ole e 1 allergen and extensin family protein; n=1; Arabidopsis thaliana|Rep: pollen Ole e 1 allergen and extensin family protein - Arabidopsis thaliana, partial (42%)	AT1G28290	AGP31	140	PPAKPPVKPPVS	12	5.17	75	136
3	Brassicaceae	Arabidopsis	thaliana	TC	Z29727 3 [Arabidopsis thaliana 14] Z29727 similar to UniRef100_UPI000150568E Cluster: pollen Ole e 1 allergen and extensin family protein; n=1; Arabidopsis thaliana|Rep: pollen Ole e 1 allergen and extensin family protein - Arabidopsis thaliana, partial (29%)	AT1G28290	AGP31	101	PPAKPPVKPPVS	12	3.33	30	69
3	Brassicaceae	Arabidopsis	thaliana	TC	DR240245 1 [Arabidopsis thaliana 14] DR240245 homologue to UniRef100_UPI000150568E Cluster: pollen Ole e 1 allergen and extensin family protein; n=1; Arabidopsis thaliana|Rep: pollen Ole e 1 allergen and extensin family protein - Arabidopsis thaliana, partial (42%)	AT1G28290	AGP31	137	PPAKPPVKPPVS	12	2.42	108	136
3	Brassicaceae	Brassica	napus	TC	TC94336 2 [Brassica napus 3-1] TC94336 similar to UniRef100_UPI000150568E Cluster: pollen Ole e 1 allergen and extensin family protein; n=1; Arabidopsis thaliana|Rep: pollen Ole e 1 allergen and extensin family protein - Arabidopsis thaliana, partial (84%)			275	PPAKPPVKPPVS	12	2	166	189
3	Brassicaceae	Brassica	napus	TC	EV125245 3 [Brassica napus 3-1] EV125245 similar to UniRef100_UPI000150568E Cluster: pollen Ole e 1 allergen and extensin family protein; n=1; Arabidopsis thaliana|Rep: pollen Ole e 1 allergen and extensin family protein - Arabidopsis thaliana, partial (74%)			236	PPAKPPVKPPVS	12	2	160	183
3	Brassicaceae	Thlaspi	caerulescens	TA	DN923948 2 [Thlaspi caerulescens release] DN923948			167	PPAKPPVKPPVS	12	2.58	80	110
3	Brassicaceae	Brassica	rapa	TA	CX272325 2 [Brassica rapa release] CX272325			214	PPAKPPVKPPVS	12	8.42	64	164
3	Brassicaceae	Brassica	rapa	TA	TA3783_3711 1 [Brassica rapa release] TA3783_3711 F3H9.6 protein [Arabidopsis thaliana (Mouse-ear cress)]			225	PPAKAPVKPPVK	12	5.83	67	136
3	Brassicaceae	Arabidopsis	thaliana	NR	gi|15217879|ref|NP_174150.1| AGP31 (arabinogalactan-protein 31) [Arabidopsis thaliana] gi|9795608|gb|AAF98426.1|AC021044_5 Unknown protein [Arabidopsis thaliana] gi|119360033|gb|ABL66745.1| At1g28290 [Arabidopsis thaliana]	AT1G28290	AGP31	359	PPTKPPVKPPVS	12	4.17	173	222
3	Brassicaceae	Arabidopsis	thaliana	TC	TC323043 1 [Arabidopsis thaliana 14] TC323043 UniRef100_Q9M7P1 Cluster: Proline-rich protein 1; n=1; Arabidopsis thaliana|Rep: Proline-rich protein 1 - Arabidopsis thaliana (Mouse-ear cress), complete	AT1G54970	PRP1	338	PVHKPTLPPPVYTP	14	6.14	29	116
3	Brassicaceae	Arabidopsis	thaliana	NR	gi|15221949|ref|NP_175895.1| ATPRP1 (PROLINE-RICH PROTEIN 1); structural constituent of cell wall [Arabidopsis thaliana] gi|9857527|gb|AAG00882.1|AC064840_13 proline-rich protein 1 [Arabidopsis thaliana] gi|12322156|gb|AAG51112.1|AC069144_9 proline-rich protein, putative [Arabidopsis thaliana]	AT1G54970	PRP1	335	PVHKPTLPPPVYTP	14	6.14	29	116
3	Brassicaceae	Arabidopsis	thaliana	NR	gi|7620009|gb|AAF64548.1|AF110985_1 proline-rich protein 1 [Arabidopsis thaliana]	AT1G54970	PRP1	335	PVHKPTLPPPVYTP	14	6.14	29	116
3	Brassicaceae	Brassica	napus	TC	TC71296 1 [Brassica napus 3-1] TC71296 similar to UniRef100_Q9M7N8 Cluster: Proline-rich protein 4; n=1; Arabidopsis thaliana|Rep: Proline-rich protein 4 - Arabidopsis thaliana (Mouse-ear cress), partial (92%)			604	PVYKPPPKVEHPPPV	15	7.67	219	333
3	Brassicaceae	Brassica	napus	TC	TC107246 3 [Brassica napus 3-1] TC107246 similar to UniRef100_Q9M7N8 Cluster: Proline-rich protein 4; n=1; Arabidopsis thaliana|Rep: Proline-rich protein 4 - Arabidopsis thaliana (Mouse-ear cress), partial (51%)			263	PVYKPPPKVEHPPPV	15	6.67	53	152
3	Brassicaceae	Brassica	oleracea	TA	TA2996_3712 3 [Brassica oleracea release] TA2996_3712 Proline-rich protein 4 [Arabidopsis thaliana (Mouse-ear cress)]			332	PVYKPPPKVEHPPPV	15	7.67	214	328
3	Ranunculaceae	Aquilegia	formosa	TC	TC25327 1 [Aquilegia formosa NoSp] TC25327 similar to UniRef100_O82066 Cluster: Proline-rich protein; n=1; Solanum tuberosum|Rep: Proline-rich protein - Solanum tuberosum (Potato), partial (42%)			638	PPPVPIYKPPVYKPL	15	14.07	232	448
3	Rubiaceae	Coffea	canephora	TC	TC2588 2 [Coffea canephora 1] TC2588 similar to UniRef100_O82066 Cluster: Proline-rich protein; n=1; Solanum tuberosum|Rep: Proline-rich protein - Solanum tuberosum (Potato), partial (51%)			345	PPPVPIYKPPVYQKPL	16	8.12	213	343
3	Rubiaceae	Coffea	canephora	TC	TC7392 2 [Coffea canephora 1] TC7392			273	PPPVPIYKPPVYQKPL	16	13.38	0	213
3	Rubiaceae	Coffea	canephora	TC	DV672161 1 [Coffea canephora 1] DV672161 similar to UniRef100_O82066 Cluster: Proline-rich protein; n=1; Solanum tuberosum|Rep: Proline-rich protein - Solanum tuberosum (Potato), partial (23%)			165	PPPVPIYKPPVYQKPL	16	8.75	0	139
3	Magnoliaceae	Liriodendron	tulipifera	TA	TA1237_3415 3 [Liriodendron tulipifera release] TA1237_3415			203	PPPTPVYKPPPVYKPK	16	5.56	32	120
3	Pinaceae	Pinus	taeda	TC	TC84467 3 [Pinus taeda NoSp] TC84467 similar to UniRef100_Q9MAW3 Cluster: TrPRP2; n=1; Trifolium repens|Rep: TrPRP2 - Trifolium repens (Creeping white clover), partial (48%)			314	PVYKPPVPVIPPPVVKPP	18	10.11	54	243
3	Pinaceae	Pinus	taeda	TC	TC88474 2 [Pinus taeda NoSp] TC88474 similar to UniRef100_Q9FUR6 Cluster: ENOD2; n=1; Cladrastis kentukea|Rep: ENOD2 - Cladrastis lutea (Yellow wood), partial (67%)			348	PVYKPPVPVIPPPVVKPP	18	6.67	218	343
3	Pinaceae	Pinus	taeda	TC	TC88850 2 [Pinus taeda NoSp] TC88850 weakly similar to UniRef100_Q9FUR6 Cluster: ENOD2; n=1; Cladrastis kentukea|Rep: ENOD2 - Cladrastis lutea (Yellow wood), partial (73%)			370	PVYKPPVPVIPPPVVKPP	18	10.78	78	271
3	Pinaceae	Pinus	taeda	TC	TC93219 2 [Pinus taeda NoSp] TC93219 similar to UniRef100_Q9MAW3 Cluster: TrPRP2; n=1; Trifolium repens|Rep: TrPRP2 - Trifolium repens (Creeping white clover), partial (62%)			714	PVYKPPVPVIPPPVVKPP	18	8.28	241	395
3	Pinaceae	Pinus	taeda	TC	TC98235 3 [Pinus taeda NoSp] TC98235 similar to UniRef100_Q9MAW3 Cluster: TrPRP2; n=1; Trifolium repens|Rep: TrPRP2 - Trifolium repens (Creeping white clover), partial (41%)			404	PVYKPPVPVIPPPVVKPP	18	12	0	231
3	Pinaceae	Pinus	taeda	TC	TC101342 3 [Pinus taeda NoSp] TC101342 weakly similar to UniRef100_Q9FUR7 Cluster: ENOD2; n=1; Styphnolobium japonicum|Rep: ENOD2 - Sophora japonica (Japanese pagoda tree), partial (80%)			404	PVYKPPVPVIPPPVVKPP	18	11.17	44	244
3	Pinaceae	Pinus	taeda	TC	TC102544 1 [Pinus taeda NoSp] TC102544			791	PVYKPPVPVIPPPVVKPP	18	10.11	6	195
3	Pinaceae	Pinus	taeda	TC	TC101342 3 [Pinus taeda NoSp] TC101342 weakly similar to UniRef100_Q9FUR7 Cluster: ENOD2; n=1; Styphnolobium japonicum|Rep: ENOD2 - Sophora japonica (Japanese pagoda tree), partial (80%)			404	PVYKPPVPVIPPPVVKPP	18	4.78	111	196
3	Pinaceae	Pinus	taeda	TC	TC104558 1 [Pinus taeda NoSp] TC104558 similar to UniRef100_Q9FUR6 Cluster: ENOD2; n=1; Cladrastis kentukea|Rep: ENOD2 - Cladrastis lutea (Yellow wood), partial (64%)			359	PVYKPPVPVIPPPVVKPP	18	10	171	358
3	Pinaceae	Pinus	taeda	TC	TC106368 1 [Pinus taeda NoSp] TC106368 dbj|D38245.1| Pinus elliottii gene for 18S rRNA, partial (53%)			427	PVYKPPVPVIPPPVVKPP	18	5.11	307	398
3	Pinaceae	Pinus	taeda	TC	TC113196 1 [Pinus taeda NoSp] TC113196 similar to UniRef100_Q9FUR7 Cluster: ENOD2; n=1; Styphnolobium japonicum|Rep: ENOD2 - Sophora japonica (Japanese pagoda tree), partial (42%)			438	PVYKPPVPVIPPPVVKPP	18	5.83	72	188
3	Pinaceae	Pinus	taeda	TC	CF663729 1 [Pinus taeda NoSp] CF663729 weakly similar to UniRef100_Q9FUR6 Cluster: ENOD2; n=1; Cladrastis kentukea|Rep: ENOD2 - Cladrastis lutea (Yellow wood), partial (64%)			265	PVYKPPVPVIPPPVVKPP	18	8.56	0	153
3	Pinaceae	Pinus	taeda	TC	DR057550 3 [Pinus taeda NoSp] DR057550 weakly similar to UniRef100_Q9FUR6 Cluster: ENOD2; n=1; Cladrastis kentukea|Rep: ENOD2 - Cladrastis lutea (Yellow wood), partial (59%)			260	PVYKPPVPVIPPPVVKPP	18	9.28	0	170
3	Pinaceae	Pinus	pinaster	TA	TA2917_71647 1 [Pinus pinaster release] TA2917_71647			433	PVYKPPVPVIPPPVVKPP	18	11.17	49	249
3	Pinaceae	Pinus	pinaster	TA	TA2917_71647 1 [Pinus pinaster release] TA2917_71647			433	PVYKPPVPVIPPPVVKPP	18	4.78	116	201
3	Pinaceae	Pinus	pinaster	TA	CT576734 3 [Pinus pinaster release] CT576734			179	PVYKPPVPVIPPPVVKPP	18	7.06	7	133
3	Pinaceae	Pinus	pinaster	TA	CT576734 3 [Pinus pinaster release] CT576734			179	PVYKPPVPVIPPPVVKPP	18	4.78	18	103
3	Pinaceae	Picea	glauca	TC	TC60724 2 [Picea glauca NoSp] TC60724 similar to UniRef100_Q9MAW3 Cluster: TrPRP2; n=1; Trifolium repens|Rep: TrPRP2 - Trifolium repens (Creeping white clover), partial (35%)			479	PIYKPPVPVIPPPVIKPP	18	3.67	175	240
3	Pinaceae	Picea	glauca	TC	TC72136 3 [Picea glauca NoSp] TC72136 weakly similar to UniRef100_Q9FUR6 Cluster: ENOD2; n=1; Cladrastis kentukea|Rep: ENOD2 - Cladrastis lutea (Yellow wood), partial (33%)			348	PIYKPPVPVIPPPVIKPP	18	6.67	43	162
3	Pinaceae	Picea	glauca	TC	TC78072 2 [Picea glauca NoSp] TC78072 similar to UniRef100_Q40375 Cluster: Repetitive proline-rich cell wall protein 2 precursor; n=1; Medicago truncatula|Rep: Repetitive proline-rich cell wall protein 2 precursor - Medicago truncatula (Barrel medic), partial (40%)			441	PIYKPPVPVIPPPVIKPP	18	7	218	343
3	Pinaceae	Picea	glauca	TC	TC83888 3 [Picea glauca NoSp] TC83888 UniRef100_Q3I3W9 Cluster: Late embryogenesis abundant protein; n=2; Picea|Rep: Late embryogenesis abundant protein - Picea mariana (Black spruce), complete			436	PIYKPPVPVIPPPVIKPP	18	3.11	35	90
3	Pinaceae	Picea	glauca	TC	CK440938 3 [Picea glauca NoSp] CK440938 weakly similar to UniRef100_Q9FUR6 Cluster: ENOD2; n=1; Cladrastis kentukea|Rep: ENOD2 - Cladrastis lutea (Yellow wood), partial (26%)			122	PIYKPPVPVIPPPVIKPP	18	5.61	0	100
3	Pinaceae	Picea	abies	TA	TA118_3329 3 [Picea abies release] TA118_3329			281	PIYKPPVPVIPPPVIKPP	18	3.33	37	97
3	Vitaceae	Vitis	vinifera	TC	EE098432 3 [Vitis vinifera 6] EE098432			239	PEYKPPTPVYKPPPVKPP	18	5.39	26	125
3	Vitaceae	Vitis	vinifera	TC	TC73949 3 [Vitis vinifera 6] TC73949			354	PEYKPPTPVYKPPPVEKPP	19	4.42	26	109
3	Vitaceae	Vitis	vinifera	TC	TC75270 2 [Vitis vinifera 6] TC75270			329	PEYKPPTPVYKPPPVEKPP	19	4.89	35	127
3	Vitaceae	Vitis	vinifera	TC	TC76628 2 [Vitis vinifera 6] TC76628 UniRef100_A7QBR9 Cluster: Chromosome chr1 scaffold_75, whole genome shotgun sequence; n=1; Vitis vinifera|Rep: Chromosome chr1 scaffold_75, whole genome shotgun sequence - Vitis vinifera (Grape), partial (97%)			476	PEYKPPTPVYKPPPVEKPP	19	5.16	12	109
3	Vitaceae	Vitis	vinifera	TC	TC77411 3 [Vitis vinifera 6] TC77411 homologue to UniRef100_P27161 Cluster: Calmodulin; n=4; Solanaceae|Rep: Calmodulin - Solanum lycopersicum (Tomato) (Lycopersicon esculentum), complete			569	PEYKPPTPVYKPPPVEKPP	19	6.53	25	149
3	Vitaceae	Vitis	vinifera	TC	TC77460 1 [Vitis vinifera 6] TC77460			272	PEYKPPTPVYKPPPVEKPP	19	4.89	27	119
3	Vitaceae	Vitis	vinifera	TC	TC77962 1 [Vitis vinifera 6] TC77962			262	PEYKPPTPVYKPPPVEKPP	19	4.89	27	119
3	Vitaceae	Vitis	vinifera	TC	TC79205 1 [Vitis vinifera 6] TC79205			317	PEYKPPTPVYKPPPVEKPP	19	4.37	39	121
3	Vitaceae	Vitis	vinifera	TC	TC79758 1 [Vitis vinifera 6] TC79758			239	PEYKPPTPVYKPPPVEKPP	19	4.26	21	101
3	Vitaceae	Vitis	vinifera	TC	TC80138 3 [Vitis vinifera 6] TC80138 homologue to UniRef100_A7KZP6 Cluster: SKP1 component-like 1; n=1; Humulus lupulus|Rep: SKP1 component-like 1 - Humulus lupulus (European hop), complete			473	PEYKPPTPVYKPPPVEKPP	19	4.89	26	118
3	Vitaceae	Vitis	vinifera	TC	TC83417 2 [Vitis vinifera 6] TC83417			213	PEYKPPTPVYKPPPVEKPP	19	5.21	1	99
3	Vitaceae	Vitis	vinifera	TC	TC83628 2 [Vitis vinifera 6] TC83628			240	PEYKPPTPVYKPPPVEKPP	19	5.53	12	117
3	Vitaceae	Vitis	vinifera	TC	TC84413 3 [Vitis vinifera 6] TC84413 homologue to UniRef100_A7QRI8 Cluster: Chromosome chr8 scaffold_150, whole genome shotgun sequence; n=1; Vitis vinifera|Rep: Chromosome chr8 scaffold_150, whole genome shotgun sequence - Vitis vinifera (Grape), partial (84%)			314	PEYKPPTPVYKPPPVEKPP	19	2	1	38
3	Vitaceae	Vitis	vinifera	TC	TC86236 2 [Vitis vinifera 6] TC86236 homologue to UniRef100_A7P6D5 Cluster: Chromosome chr9 scaffold_7, whole genome shotgun sequence; n=1; Vitis vinifera|Rep: Chromosome chr9 scaffold_7, whole genome shotgun sequence - Vitis vinifera (Grape), partial (64%)			542	PEYKPPTPVYKPPPVEKPP	19	6.53	120	244
3	Vitaceae	Vitis	vinifera	TC	TC87123 1 [Vitis vinifera 6] TC87123			337	PEYKPPTPVYKPPPVEKPP	19	2.47	15	61
3	Vitaceae	Vitis	vinifera	TC	TC87730 3 [Vitis vinifera 6] TC87730 homologue to UniRef100_P62302 Cluster: 40S ribosomal protein S13; n=1; Glycine max|Rep: 40S ribosomal protein S13 - Glycine max (Soybean), complete			639	PEYKPPTPVYKPPPVEKPP	19	3.05	385	442
3	Vitaceae	Vitis	vinifera	TC	TC89867 2 [Vitis vinifera 6] TC89867			218	PEYKPPTPVYKPPPVEKPP	19	4.42	0	83
3	Vitaceae	Vitis	vinifera	TC	TC90485 1 [Vitis vinifera 6] TC90485			227	PEYKPPTPVYKPPPVEKPP	19	5.68	20	127
3	Vitaceae	Vitis	vinifera	TC	TC90780 1 [Vitis vinifera 6] TC90780			331	PEYKPPTPVYKPPPVEKPP	19	4.89	34	126
3	Vitaceae	Vitis	vinifera	TC	TC91249 2 [Vitis vinifera 6] TC91249			281	PEYKPPTPVYKPPPVEKPP	19	4.53	44	129
3	Vitaceae	Vitis	vinifera	TC	TC92305 1 [Vitis vinifera 6] TC92305 UniRef100_A7PEC6 Cluster: Chromosome chr11 scaffold_13, whole genome shotgun sequence; n=1; Vitis vinifera|Rep: Chromosome chr11 scaffold_13, whole genome shotgun sequence - Vitis vinifera (Grape), complete			416	PEYKPPTPVYKPPPVEKPP	19	4.21	30	109
3	Vitaceae	Vitis	vinifera	TC	TC92975 1 [Vitis vinifera 6] TC92975			215	PEYKPPTPVYKPPPVEKPP	19	5.16	4	101
3	Vitaceae	Vitis	vinifera	TC	TC93249 2 [Vitis vinifera 6] TC93249			244	PEYKPPTPVYKPPPVEKPP	19	5.53	35	140
3	Vitaceae	Vitis	vinifera	TC	TC94086 3 [Vitis vinifera 6] TC94086 UniRef100_A7Q6S8 Cluster: Chromosome chr12 scaffold_57, whole genome shotgun sequence; n=1; Vitis vinifera|Rep: Chromosome chr12 scaffold_57, whole genome shotgun sequence - Vitis vinifera (Grape), partial (54%)			373	PEYKPPTPVYKPPPVEKPP	19	3.05	162	219
3	Vitaceae	Vitis	vinifera	TC	TC94677 3 [Vitis vinifera 6] TC94677			206	PEYKPPTPVYKPPPVEKPP	19	6.32	36	156
3	Vitaceae	Vitis	vinifera	TC	TC95767 3 [Vitis vinifera 6] TC95767			262	PEYKPPTPVYKPPPVEKPP	19	3.05	14	71
3	Vitaceae	Vitis	vinifera	TC	TC96275 1 [Vitis vinifera 6] TC96275			288	PEYKPPTPVYKPPPVEKPP	19	3.11	21	79
3	Vitaceae	Vitis	vinifera	TC	TC97048 1 [Vitis vinifera 6] TC97048			606	PEYKPPTPVYKPPPVEKPP	19	4.89	402	494
3	Vitaceae	Vitis	vinifera	TC	TC97990 2 [Vitis vinifera 6] TC97990			302	PEYKPPTPVYKPPPVEKPP	19	5.53	28	133
3	Vitaceae	Vitis	vinifera	TC	TC98952 3 [Vitis vinifera 6] TC98952			276	PEYKPPTPVYKPPPVEKPP	19	5.21	34	133
3	Vitaceae	Vitis	vinifera	TC	TC101174 1 [Vitis vinifera 6] TC101174 UniRef100_A7QCD0 Cluster: Chromosome undetermined scaffold_77, whole genome shotgun sequence; n=1; Vitis vinifera|Rep: Chromosome undetermined scaffold_77, whole genome shotgun sequence - Vitis vinifera (Grape), partial (15%)			393	PEYKPPTPVYKPPPVEKPP	19	2.37	40	84
3	Vitaceae	Vitis	vinifera	TC	TC101483 3 [Vitis vinifera 6] TC101483			298	PEYKPPTPVYKPPPVEKPP	19	3.47	133	198
3	Vitaceae	Vitis	vinifera	TC	TC101542 2 [Vitis vinifera 6] TC101542 UniRef100_A7PIU7 Cluster: Chromosome chr13 scaffold_17, whole genome shotgun sequence; n=1; Vitis vinifera|Rep: Chromosome chr13 scaffold_17, whole genome shotgun sequence - Vitis vinifera (Grape), partial (18%)			461	PEYKPPTPVYKPPPVEKPP	19	2.37	212	256
3	Vitaceae	Vitis	vinifera	TC	TC101608 2 [Vitis vinifera 6] TC101608			436	PEYKPPTPVYKPPPVEKPP	19	4.89	37	129
3	Vitaceae	Vitis	vinifera	TC	TC102042 1 [Vitis vinifera 6] TC102042 weakly similar to UniRef100_Q3LHL3 Cluster: MYB-CC type transfactor; n=1; Solanum tuberosum|Rep: MYB-CC type transfactor - Solanum tuberosum (Potato), partial (47%)			419	PEYKPPTPVYKPPPVEKPP	19	4.79	23	114
3	Vitaceae	Vitis	vinifera	TC	TC104594 2 [Vitis vinifera 6] TC104594			229	PEYKPPTPVYKPPPVEKPP	19	6.53	20	144
3	Vitaceae	Vitis	vinifera	TC	CB009612 1 [Vitis vinifera 6] CB009612			218	PEYKPPTPVYKPPPVEKPP	19	3	73	129
3	Vitaceae	Vitis	vinifera	TC	CB917005 2 [Vitis vinifera 6] CB917005			174	PEYKPPTPVYKPPPVEKPP	19	3.32	0	62
3	Vitaceae	Vitis	vinifera	TC	EE073636 3 [Vitis vinifera 6] EE073636			248	PEYKPPTPVYKPPPVEKPP	19	4.89	17	109
3	Vitaceae	Vitis	vinifera	TC	CB005656 2 [Vitis vinifera 6] CB005656			168	PEYKPPTPVYKPPPVEKPP	19	5.53	15	120
3	Vitaceae	Vitis	vinifera	TC	BQ797011 3 [Vitis vinifera 6] BQ797011			278	PEYKPPTPVYKPPPVEKPP	19	3.11	115	173
3	Vitaceae	Vitis	vinifera	TC	TC78553 2 [Vitis vinifera 6] TC78553			290	PEYKPPTPVYKSPPVEKPP	19	3.68	25	94
3	Vitaceae	Vitis	vinifera	TC	NP9539239 1 [Vitis vinifera 6] NP9539239 GB|AM426224.2|CAN75648.1 hypothetical protein			156	PEYKPPTPVYKSPPVEKPP	19	4.11	24	102
3	Vitaceae	Vitis	vinifera	TC	CB008363 3 [Vitis vinifera 6] CB008363			202	PEYKPPTPVYKSPPVEKPP	19	4.26	17	98
3	Vitaceae	Vitis	vinifera	NR	gi|225433063|ref|XP_002285034.1| PREDICTED: hypothetical protein isoform 2 [Vitis vinifera]			217	PEYKPPTPVYKPPPVEKPP	19	5.53	25	130
3	Vitaceae	Vitis	vinifera	NR	gi|225433065|ref|XP_002285028.1| PREDICTED: hypothetical protein isoform 1 [Vitis vinifera]			207	PEYKPPTPVYKPPPVEKPP	19	4.84	25	120
3	Vitaceae	Vitis	vinifera	NR	gi|7406655|emb|CAB85621.1| putative proline-rich cell wall protein [Vitis vinifera]			204	PEYKPPTPVYKPPPVEKPP	19	4.89	25	117
3	Vitaceae	Vitis	vinifera	NR	gi|7406657|emb|CAB85622.1| putative proline-rich cell wall protein [Vitis vinifera]			217	PEYKPPTPVYKPPPVEKPP	19	5.53	25	130
3	Vitaceae	Vitis	vinifera	NR	gi|147767390|emb|CAN75648.1| hypothetical protein [Vitis vinifera]			155	PEYKPPTPVYKSPPVEKPP	19	4.11	24	102
3	Brassicaceae	Arabidopsis	thaliana	TC	TC315562 3 [Arabidopsis thaliana 14] TC315562 UniRef100_UPI000150568E Cluster: pollen Ole e 1 allergen and extensin family protein; n=1; Arabidopsis thaliana|Rep: pollen Ole e 1 allergen and extensin family protein - Arabidopsis thaliana, complete	AT1G28290	AGP31	439	PPTKPPVKPPVYPPTKAPVK	20	6.45	79	207
3	Brassicaceae	Arabidopsis	thaliana	TC	AV442464 3 [Arabidopsis thaliana 14] AV442464 similar to UniRef100_UPI000150568E Cluster: pollen Ole e 1 allergen and extensin family protein; n=1; Arabidopsis thaliana|Rep: pollen Ole e 1 allergen and extensin family protein - Arabidopsis thaliana, partial (37%)	AT1G28290	AGP31	116	PPTKPPVKPPVYPPTKAPVK	20	3.05	0	60
3	Brassicaceae	Arabidopsis	thaliana	TC	AV543170 2 [Arabidopsis thaliana 14] AV543170 homologue to UniRef100_UPI000150568E Cluster: pollen Ole e 1 allergen and extensin family protein; n=1; Arabidopsis thaliana|Rep: pollen Ole e 1 allergen and extensin family protein - Arabidopsis thaliana, partial (55%)	AT1G28290	AGP31	192	PPTKPPVKPPVYPPTKAPVK	20	6.25	65	189
3	Brassicaceae	Arabidopsis	thaliana	TC	AV553534 2 [Arabidopsis thaliana 14] AV553534 homologue to UniRef100_UPI000150568E Cluster: pollen Ole e 1 allergen and extensin family protein; n=1; Arabidopsis thaliana|Rep: pollen Ole e 1 allergen and extensin family protein - Arabidopsis thaliana, partial (40%)	AT1G28290	AGP31	141	PPTKPPVKPPVYPPTKAPVK	20	3.65	54	126
3	Brassicaceae	Brassica	napus	TC	TC86196 2 [Brassica napus 3-1] TC86196 similar to UniRef100_UPI000150568E Cluster: pollen Ole e 1 allergen and extensin family protein; n=1; Arabidopsis thaliana|Rep: pollen Ole e 1 allergen and extensin family protein - Arabidopsis thaliana, complete			360	PPAKPPVKPPVKPPTKAPVK	20	5.4	70	177
3	Brassicaceae	Arabidopsis	thaliana	NR	gi|15217879|ref|NP_174150.1| AGP31 (arabinogalactan-protein 31) [Arabidopsis thaliana] gi|9795608|gb|AAF98426.1|AC021044_5 Unknown protein [Arabidopsis thaliana] gi|119360033|gb|ABL66745.1| At1g28290 [Arabidopsis thaliana]	AT1G28290	AGP31	359	PPTKPPVKPPVYPPTKAPVK	20	6.45	70	198
3	Brassicaceae	Arabidopsis	thaliana	TC	NP206798 1 [Arabidopsis thaliana 14] NP206798 GB|AL162651.1|CAB83118.1 proline-rich protein	AT3G62680	PRP3	314	PVYKPTLSPPVYTKPTIPPPVYTP	24	5	44	166
3	Brassicaceae	Arabidopsis	thaliana	TC	NP208975 1 [Arabidopsis thaliana 14] NP208975 GB|AF110987.1|AAF64550.1 proline-rich protein 3	AT3G62680	PRP3	314	PVYKPTLSPPVYTKPTIPPPVYTP	24	5	44	166
3	Brassicaceae	Arabidopsis	thaliana	TC	NP2698234 3 [Arabidopsis thaliana 14] NP2698234 GB|NM_116133.2|NP_191827.1 PRP3 (PROLINE-RICH PROTEIN 3); structural constituent of cell wall;similar to ATPRP1 (PROLINE-RICH PROTEIN 1) [Arabidopsis thaliana] (TAIR:AT1G54970.1); similar to TrPRP2 [Trifolium repens] (GB:BAA96106.1); contains InterPro domain Extensin-like protein;	AT3G62680	PRP3	390	PVYKPTLSPPVYTKPTIPPPVYTP	24	5	62	184
3	Brassicaceae	Arabidopsis	thaliana	NR	gi|7620013|gb|AAF64550.1|AF110987_1 proline-rich protein 3 [Arabidopsis thaliana]	AT3G62680	PRP3	313	PVYKPTLSPPVYTKPTIPPPVYTP	24	5	44	166
3	Brassicaceae	Arabidopsis	thaliana	NR	gi|15228828|ref|NP_191827.1| PRP3 (PROLINE-RICH PROTEIN 3); structural constituent of cell wall [Arabidopsis thaliana] gi|7362748|emb|CAB83118.1| proline-rich protein [Arabidopsis thaliana]	AT3G62680	PRP3	313	PVYKPTLSPPVYTKPTIPPPVYTP	24	5	44	166
3	Brassicaceae	Brassica	napus	TC	TC94336 2 [Brassica napus 3-1] TC94336 similar to UniRef100_UPI000150568E Cluster: pollen Ole e 1 allergen and extensin family protein; n=1; Arabidopsis thaliana|Rep: pollen Ole e 1 allergen and extensin family protein - Arabidopsis thaliana, partial (84%)			275	PPAKPPVKPPVYPPTKAPVKPPTKPPVKPPVS	32	3	93	188
3	Brassicaceae	Brassica	napus	TC	EV125245 3 [Brassica napus 3-1] EV125245 similar to UniRef100_UPI000150568E Cluster: pollen Ole e 1 allergen and extensin family protein; n=1; Arabidopsis thaliana|Rep: pollen Ole e 1 allergen and extensin family protein - Arabidopsis thaliana, partial (74%)			236	PPAKPPVKPPVYPPTKAPVKPPTKPPVKPPVS	32	3.22	80	182
3	Brassicaceae	Arabidopsis	thaliana	TC	DR240245 1 [Arabidopsis thaliana 14] DR240245 homologue to UniRef100_UPI000150568E Cluster: pollen Ole e 1 allergen and extensin family protein; n=1; Arabidopsis thaliana|Rep: pollen Ole e 1 allergen and extensin family protein - Arabidopsis thaliana, partial (42%)	AT1G28290	AGP31	137	PPAKPPVKPPVYPPTKAPAESPSKPPVKAPVS	32	2.03	70	134
3	Brassicaceae	Thellungiella	salsuginea	TA	DN778269 1 [Thellungiella salsuginea release] DN778269 F3H9.6 protein [Arabidopsis thaliana (Mouse-ear cress)]			192	PPAKPPAKAPVYPPTKAPVKPPTKAPVKPPVS	32	3.06	66	163
3	Brassicaceae	Brassica	napus	TC	TC72677 1 [Brassica napus 3-1] TC72677 similar to UniRef100_UPI000150568E Cluster: pollen Ole e 1 allergen and extensin family protein; n=1; Arabidopsis thaliana|Rep: pollen Ole e 1 allergen and extensin family protein - Arabidopsis thaliana, partial (67%)			246	PPAKPPVKPPVYPPTKAPVKPPVKPPAKPPVSPPAKPPVKPPVS	44	3.23	71	212
3	Brassicaceae	Brassica	rapa	TA	CX265805 1 [Brassica rapa release] CX265805 F3H9.6 protein [Arabidopsis thaliana (Mouse-ear cress)]			225	PPAKPPVKPPVYPPTKAPVKPPVKPPAKPPVSPPAKPPVKPPVS	44	2.93	55	183
3	Brassicaceae	Brassica	rapa	TA	TA2657_3711 1 [Brassica rapa release] TA2657_3711			233	PPAKPPVKPPVYPPTKAPVKPPVKPPAKPPVSPPAKPPIKPPVS	44	2.86	70	195
3	Rubiaceae	Coffea	canephora	TC	TC6250 1 [Coffea canephora 1] TC6250			485	PPVKPPVHPPVYPPVKPPVHPPVKPPVHPPVKPPVHPPVKPPVH	44	4.89	71	285
4	Malvaceae	Gossypium	hirsutum	TC	TC129768 3 [Gossypium hirsutum NoSp] TC129768 similar to UniRef100_Q40336 Cluster: Proline-rich cell wall protein; n=1; Medicago sativa|Rep: Proline-rich cell wall protein - Medicago sativa (Alfalfa), partial (49%)			401	VKPPV	5	3.6	88	106
4	Malvaceae	Gossypium	hirsutum	TC	TC130201 3 [Gossypium hirsutum NoSp] TC130201 weakly similar to UniRef100_Q8L685 Cluster: Pherophorin-dz1 protein precursor; n=1; Volvox carteri f. nagariensis|Rep: Pherophorin-dz1 protein precursor - Volvox carteri f. nagariensis, partial (28%)			405	VKPPV	5	3.6	123	141
4	Malvaceae	Gossypium	hirsutum	TC	TC130554 2 [Gossypium hirsutum NoSp] TC130554 similar to UniRef100_Q40336 Cluster: Proline-rich cell wall protein; n=1; Medicago sativa|Rep: Proline-rich cell wall protein - Medicago sativa (Alfalfa), partial (57%)			537	VKPPV	5	3.6	148	166
4	Malvaceae	Gossypium	hirsutum	TC	TC130554 2 [Gossypium hirsutum NoSp] TC130554 similar to UniRef100_Q40336 Cluster: Proline-rich cell wall protein; n=1; Medicago sativa|Rep: Proline-rich cell wall protein - Medicago sativa (Alfalfa), partial (57%)			537	VKPPV	5	3.2	105	120
4	Malvaceae	Gossypium	hirsutum	TC	TC132728 2 [Gossypium hirsutum NoSp] TC132728 similar to UniRef100_Q40336 Cluster: Proline-rich cell wall protein; n=1; Medicago sativa|Rep: Proline-rich cell wall protein - Medicago sativa (Alfalfa), partial (40%)			421	VKPPV	5	3.6	116	134
4	Malvaceae	Gossypium	hirsutum	TC	TC143442 3 [Gossypium hirsutum NoSp] TC143442 similar to UniRef100_Q40336 Cluster: Proline-rich cell wall protein; n=1; Medicago sativa|Rep: Proline-rich cell wall protein - Medicago sativa (Alfalfa), partial (58%)			423	VKPPV	5	3.6	117	135
4	Malvaceae	Gossypium	hirsutum	TC	ES798127 1 [Gossypium hirsutum NoSp] ES798127 similar to UniRef100_A8NQG1 Cluster: Predicted protein; n=1; Coprinopsis cinerea okayama7#130|Rep: Predicted protein - Coprinopsis cinerea okayama7#130, partial (18%)			223	VKPPV	5	3.6	78	96
4	Malvaceae	Gossypium	hirsutum	TC	ES791767 3 [Gossypium hirsutum NoSp] ES791767 weakly similar to UniRef100_Q8L685 Cluster: Pherophorin-dz1 protein precursor; n=1; Volvox carteri f. nagariensis|Rep: Pherophorin-dz1 protein precursor - Volvox carteri f. nagariensis, partial (14%)			397	VKPPV	5	3.6	98	116
4	Malvaceae	Gossypium	hirsutum	TC	ES811242 1 [Gossypium hirsutum NoSp] ES811242 similar to UniRef100_Q40336 Cluster: Proline-rich cell wall protein; n=1; Medicago sativa|Rep: Proline-rich cell wall protein - Medicago sativa (Alfalfa), partial (58%)			398	VKPPV	5	3.6	119	137
4	Malvaceae	Gossypium	hirsutum	TC	ES801201 1 [Gossypium hirsutum NoSp] ES801201 similar to UniRef100_Q40336 Cluster: Proline-rich cell wall protein; n=1; Medicago sativa|Rep: Proline-rich cell wall protein - Medicago sativa (Alfalfa), partial (35%)			453	VKPPV	5	3.6	120	138
4	Malvaceae	Gossypium	raimondii	TC	TC9 2 [Gossypium raimondii 1] TC9 similar to UniRef100_Q40336 Cluster: Proline-rich cell wall protein; n=1; Medicago sativa|Rep: Proline-rich cell wall protein - Medicago sativa (Alfalfa), partial (60%)			578	VKPPV	5	3.6	148	166
4	Malvaceae	Gossypium	raimondii	TC	TC9 2 [Gossypium raimondii 1] TC9 similar to UniRef100_Q40336 Cluster: Proline-rich cell wall protein; n=1; Medicago sativa|Rep: Proline-rich cell wall protein - Medicago sativa (Alfalfa), partial (60%)			578	VKPPV	5	3.2	105	120
4	Asteraceae	Helianthus	annuus	TC	TC46797 1 [Helianthus annuus 6] TC46797 weakly similar to UniRef100_Q9LIE8 Cluster: Similarity to cell wall-plasma membrane linker protein; n=1; Arabidopsis thaliana|Rep: Similarity to cell wall-plasma membrane linker protein - Arabidopsis thaliana (Mouse-ear cress), partial (13%)			260	VKPPV	5	19.8	38	136
4	Asteraceae	Helianthus	annuus	TC	TC39832 3 [Helianthus annuus 6] TC39832 similar to UniRef100_A7PF96 Cluster: Chromosome chr11 scaffold_13, whole genome shotgun sequence; n=1; Vitis vinifera|Rep: Chromosome chr11 scaffold_13, whole genome shotgun sequence - Vitis vinifera (Grape), partial (65%)			321	VKPPV	5	8.4	70	111
4	Asteraceae	Helianthus	annuus	TC	TC39854 1 [Helianthus annuus 6] TC39854 similar to UniRef100_A7PF96 Cluster: Chromosome chr11 scaffold_13, whole genome shotgun sequence; n=1; Vitis vinifera|Rep: Chromosome chr11 scaffold_13, whole genome shotgun sequence - Vitis vinifera (Grape), partial (60%)			348	VKPPV	5	5.8	70	101
4	Asteraceae	Helianthus	annuus	TC	TC40536 2 [Helianthus annuus 6] TC40536 similar to UniRef100_A7PF96 Cluster: Chromosome chr11 scaffold_13, whole genome shotgun sequence; n=1; Vitis vinifera|Rep: Chromosome chr11 scaffold_13, whole genome shotgun sequence - Vitis vinifera (Grape), partial (61%)			306	VKPPV	5	6.8	70	106
4	Asteraceae	Helianthus	annuus	TC	TC43808 3 [Helianthus annuus 6] TC43808 similar to UniRef100_A7PF96 Cluster: Chromosome chr11 scaffold_13, whole genome shotgun sequence; n=1; Vitis vinifera|Rep: Chromosome chr11 scaffold_13, whole genome shotgun sequence - Vitis vinifera (Grape), partial (53%)			270	VKPPV	5	9.8	79	127
4	Asteraceae	Helianthus	annuus	TC	TC49970 1 [Helianthus annuus 6] TC49970 similar to UniRef100_A7PF96 Cluster: Chromosome chr11 scaffold_13, whole genome shotgun sequence; n=1; Vitis vinifera|Rep: Chromosome chr11 scaffold_13, whole genome shotgun sequence - Vitis vinifera (Grape), partial (53%)			312	VKPPV	5	8.2	66	112
4	Asteraceae	Helianthus	annuus	TC	CD847773 2 [Helianthus annuus 6] CD847773 weakly similar to UniRef100_Q9LIE8 Cluster: Similarity to cell wall-plasma membrane linker protein; n=1; Arabidopsis thaliana|Rep: Similarity to cell wall-plasma membrane linker protein - Arabidopsis thaliana (Mouse-ear cress), partial (7%)			189	VKPPV	5	6.6	35	67
4	Asteraceae	Helianthus	annuus	TC	CD847397 1 [Helianthus annuus 6] CD847397 weakly similar to UniRef100_A7PF96 Cluster: Chromosome chr11 scaffold_13, whole genome shotgun sequence; n=1; Vitis vinifera|Rep: Chromosome chr11 scaffold_13, whole genome shotgun sequence - Vitis vinifera (Grape), partial (49%)			228	VKPPV	5	11.8	33	91
4	Asteraceae	Helianthus	annuus	TC	TC56101 1 [Helianthus annuus 6] TC56101 similar to UniRef100_P93705 Cluster: Hypocotil specific; n=1; Daucus carota|Rep: Hypocotil specific - Daucus carota (Carrot), partial (44%)			270	VKPPV	5	6.8	71	104
4	Asteraceae	Helianthus	annuus	TC	TC59746 2 [Helianthus annuus 6] TC59746 weakly similar to UniRef100_A7PF96 Cluster: Chromosome chr11 scaffold_13, whole genome shotgun sequence; n=1; Vitis vinifera|Rep: Chromosome chr11 scaffold_13, whole genome shotgun sequence - Vitis vinifera (Grape), partial (36%)			161	VKPPV	5	3	60	74
4	Asteraceae	Helianthus	annuus	TC	CD847605 3 [Helianthus annuus 6] CD847605 weakly similar to UniRef100_Q9MAW3 Cluster: TrPRP2; n=1; Trifolium repens|Rep: TrPRP2 - Trifolium repens (Creeping white clover), partial (34%)			165	VKPPV	5	9.8	38	86
4	Asteraceae	Helianthus	annuus	TC	DY915308 1 [Helianthus annuus 6] DY915308 similar to UniRef100_A7PF96 Cluster: Chromosome chr11 scaffold_13, whole genome shotgun sequence; n=1; Vitis vinifera|Rep: Chromosome chr11 scaffold_13, whole genome shotgun sequence - Vitis vinifera (Grape), partial (57%)			200	VKPPV	5	10.8	44	97
4	Asteraceae	Helianthus	annuus	TC	DY910005 1 [Helianthus annuus 6] DY910005 similar to UniRef100_A7PF96 Cluster: Chromosome chr11 scaffold_13, whole genome shotgun sequence; n=1; Vitis vinifera|Rep: Chromosome chr11 scaffold_13, whole genome shotgun sequence - Vitis vinifera (Grape), partial (58%)			272	VKPPV	5	3.4	87	103
4	Asteraceae	Helianthus	annuus	TC	DY911950 2 [Helianthus annuus 6] DY911950 similar to UniRef100_A7PF96 Cluster: Chromosome chr11 scaffold_13, whole genome shotgun sequence; n=1; Vitis vinifera|Rep: Chromosome chr11 scaffold_13, whole genome shotgun sequence - Vitis vinifera (Grape), partial (59%)			261	VKPPV	5	3.4	87	103
4	Asteraceae	Helianthus	annuus	TC	DY918687 3 [Helianthus annuus 6] DY918687 similar to UniRef100_P93705 Cluster: Hypocotil specific; n=1; Daucus carota|Rep: Hypocotil specific - Daucus carota (Carrot), partial (36%)			278	VKPPV	5	3.4	73	89
4	Asteraceae	Helianthus	annuus	TC	GE506424 2 [Helianthus annuus 6] GE506424 weakly similar to UniRef100_A7PF96 Cluster: Chromosome chr11 scaffold_13, whole genome shotgun sequence; n=1; Vitis vinifera|Rep: Chromosome chr11 scaffold_13, whole genome shotgun sequence - Vitis vinifera (Grape), partial (47%)			207	VKPPV	5	15.2	36	111
4	Asteraceae	Helianthus	annuus	TC	DY922377 1 [Helianthus annuus 6] DY922377 similar to UniRef100_A7PF96 Cluster: Chromosome chr11 scaffold_13, whole genome shotgun sequence; n=1; Vitis vinifera|Rep: Chromosome chr11 scaffold_13, whole genome shotgun sequence - Vitis vinifera (Grape), partial (45%)			264	VKPPV	5	2.8	90	103
4	Asteraceae	Helianthus	annuus	TC	GE506424 2 [Helianthus annuus 6] GE506424 weakly similar to UniRef100_A7PF96 Cluster: Chromosome chr11 scaffold_13, whole genome shotgun sequence; n=1; Vitis vinifera|Rep: Chromosome chr11 scaffold_13, whole genome shotgun sequence - Vitis vinifera (Grape), partial (47%)			207	VKPPV	5	10	36	85
4	Asteraceae	Lactuca	sativa	TC	TC15997 1 [Lactuca sativa 3] TC15997 similar to UniRef100_A7PF96 Cluster: Chromosome chr11 scaffold_13, whole genome shotgun sequence; n=1; Vitis vinifera|Rep: Chromosome chr11 scaffold_13, whole genome shotgun sequence - Vitis vinifera (Grape), partial (66%)			333	VKPPV	5	2.4	74	85
4	Asteraceae	Lactuca	serriola	TC	TC1834 3 [Lactuca serriola 1] TC1834 similar to UniRef100_A7PF96 Cluster: Chromosome chr11 scaffold_13, whole genome shotgun sequence; n=1; Vitis vinifera|Rep: Chromosome chr11 scaffold_13, whole genome shotgun sequence - Vitis vinifera (Grape), partial (72%)			338	VKPPV	5	2.4	81	92
4	Asteraceae	Lactuca	serriola	TC	BQ995406 2 [Lactuca serriola 1] BQ995406 similar to UniRef100_A7PF96 Cluster: Chromosome chr11 scaffold_13, whole genome shotgun sequence; n=1; Vitis vinifera|Rep: Chromosome chr11 scaffold_13, whole genome shotgun sequence - Vitis vinifera (Grape), partial (47%)			232	VKPPV	5	2.4	62	73
4	Asteraceae	Lactuca	serriola	TC	BU011156 2 [Lactuca serriola 1] BU011156 similar to UniRef100_P93705 Cluster: Hypocotil specific; n=1; Daucus carota|Rep: Hypocotil specific - Daucus carota (Carrot), partial (39%)			246	VKPPV	5	2.4	72	83
4	Rosaceae	Malus	domestica	TC	TC37478 2 [Malus domestica x] TC37478 similar to UniRef100_Q40336 Cluster: Proline-rich cell wall protein; n=1; Medicago sativa|Rep: Proline-rich cell wall protein - Medicago sativa (Alfalfa), partial (64%)			408	VKPPV	5	2.6	86	98
4	Rosaceae	Malus	domestica	TC	TC40287 2 [Malus domestica x] TC40287 homologue to gb|AF197583.1| Sarcococca confusa 18S ribosomal RNA gene, partial sequence, partial (30%)			207	VKPPV	5	2.6	175	187
4	Papaveraceae	Eschscholzia	californica	TA	TA1614_3467 3 [Eschscholzia californica release] TA1614_3467			168	VKPPV	5	2.6	65	77
4	Asteraceae	Helianthus	argophyllus	TA	TA1063_73275 2 [Helianthus argophyllus release] TA1063_73275 Expressed protein [Arabidopsis thaliana (Mouse-ear cress)]			326	VKPPV	5	5.8	57	88
4	Asteraceae	Helianthus	argophyllus	TA	TA3827_73275 2 [Helianthus argophyllus release] TA3827_73275 Cold acclimation protein WCOR518 [Triticum aestivum (Wheat)]			345	VKPPV	5	15.8	50	128
4	Asteraceae	Helianthus	argophyllus	TA	CF094280 1 [Helianthus argophyllus release] CF094280			204	VKPPV	5	5.8	63	94
4	Asteraceae	Helianthus	exilis	TA	TA1980_400408 3 [Helianthus exilis release] TA1980_400408 Expressed protein [Arabidopsis thaliana (Mouse-ear cress)]			318	VKPPV	5	5.8	65	96
4	Asteraceae	Helianthus	exilis	TA	EE642708 1 [Helianthus exilis release] EE642708 Cold acclimation protein WCOR518 [Triticum aestivum (Wheat)]			248	VKPPV	5	13.6	41	108
4	Asteraceae	Helianthus	petiolaris	TA	TA180_4234 1 [Helianthus petiolaris release] TA180_4234 Expressed protein [Arabidopsis thaliana (Mouse-ear cress)]			318	VKPPV	5	5.8	70	101
4	Asteraceae	Helianthus	petiolaris	TA	TA224_4234 1 [Helianthus petiolaris release] TA224_4234 Expressed protein [Arabidopsis thaliana (Mouse-ear cress)]			328	VKPPV	5	5.8	89	120
4	Asteraceae	Helianthus	petiolaris	TA	TA2848_4234 3 [Helianthus petiolaris release] TA2848_4234 Expressed protein [Arabidopsis thaliana (Mouse-ear cress)]			306	VKPPV	5	8.2	67	113
4	Asteraceae	Helianthus	petiolaris	TA	DY938791 3 [Helianthus petiolaris release] DY938791 Putative proline-rich protein [Lycopersicon esculentum (Tomato)]			197	VKPPV	5	5.8	61	92
4	Asteraceae	Helianthus	petiolaris	TA	DY945625 1 [Helianthus petiolaris release] DY945625			117	VKPPV	5	5.8	59	87
4	Asteraceae	Helianthus	petiolaris	TA	DY948432 1 [Helianthus petiolaris release] DY948432 Putative proline-rich protein [Nicotiana tabacum (Common tobacco)]			291	VKPPV	5	5.8	66	97
4	Asteraceae	Helianthus	petiolaris	TA	DY949516 3 [Helianthus petiolaris release] DY949516			144	VKPPV	5	5.8	52	80
4	Asteraceae	Helianthus	petiolaris	TA	DY951415 1 [Helianthus petiolaris release] DY951415			189	VKPPV	5	5.8	58	89
4	Asteraceae	Helianthus	tuberosus	TA	EL458049 1 [Helianthus tuberosus release] EL458049 Cluster: TrPRP2; n=1; Trifolium repens|Rep: TrPRP2 - Trifolium repens (Creeping white clover)			263	VKPPV	5	15.8	43	121
4	Asteraceae	Helianthus	tuberosus	TA	EL512359 1 [Helianthus tuberosus release] EL512359 Cluster: TrPRP2; n=1; Trifolium repens|Rep: TrPRP2 - Trifolium repens (Creeping white clover)			201	VKPPV	5	7.6	28	65
4	Asteraceae	Helianthus	tuberosus	TA	EL513326 2 [Helianthus tuberosus release] EL513326 Cluster: TrPRP2; n=1; Trifolium repens|Rep: TrPRP2 - Trifolium repens (Creeping white clover)			240	VKPPV	5	15.6	34	111
4	Asteraceae	Lactuca	perennis	TA	TA120_43195 1 [Lactuca perennis release] TA120_43195 Expressed protein [Arabidopsis thaliana (Mouse-ear cress)]			330	VKPPV	5	5.8	74	105
4	Asteraceae	Lactuca	perennis	TA	TA882_43195 2 [Lactuca perennis release] TA882_43195			437	VKPPV	5	2.6	40	52
4	Asteraceae	Lactuca	perennis	TA	TA4295_43195 2 [Lactuca perennis release] TA4295_43195 Expressed protein [Arabidopsis thaliana (Mouse-ear cress)]			279	VKPPV	5	3.4	74	90
4	Asteraceae	Lactuca	perennis	TA	DW083268 2 [Lactuca perennis release] DW083268 Expressed protein [Arabidopsis thaliana (Mouse-ear cress)]			270	VKPPV	5	3.4	68	84
4	Asteraceae	Lactuca	perennis	TA	DW086939 2 [Lactuca perennis release] DW086939 Expressed protein [Arabidopsis thaliana (Mouse-ear cress)]			271	VKPPV	5	2.4	90	101
4	Asteraceae	Lactuca	perennis	TA	DW088370 2 [Lactuca perennis release] DW088370			197	VKPPV	5	2.6	42	54
4	Asteraceae	Lactuca	saligna	TA	TA164_75948 2 [Lactuca saligna release] TA164_75948 Expressed protein [Arabidopsis thaliana (Mouse-ear cress)]			327	VKPPV	5	3.4	74	90
4	Asteraceae	Lactuca	virosa	TA	TA788_75947 2 [Lactuca virosa release] TA788_75947 Expressed protein [Arabidopsis thaliana (Mouse-ear cress)]			342	VKPPV	5	3.4	73	89
4	Asteraceae	Lactuca	virosa	TA	DW159741 2 [Lactuca virosa release] DW159741 Expressed protein [Arabidopsis thaliana (Mouse-ear cress)]			259	VKPPV	5	3.4	49	65
4	Asteraceae	Taraxacum	officinale	TA	TA103_50225 1 [Taraxacum officinale release] TA103_50225 Expressed protein [Arabidopsis thaliana (Mouse-ear cress)]			356	VKPPV	5	10.8	66	119
4	Asteraceae	Taraxacum	officinale	TA	TA103_50225 1 [Taraxacum officinale release] TA103_50225 Expressed protein [Arabidopsis thaliana (Mouse-ear cress)]			356	VKPPV	5	8.8	76	122
4	Asteraceae	Taraxacum	officinale	TA	DY813353 3 [Taraxacum officinale release] DY813353 Expressed protein [Arabidopsis thaliana (Mouse-ear cress)]			288	VKPPV	5	5.4	70	96
4	Asteraceae	Taraxacum	officinale	TA	DY813353 3 [Taraxacum officinale release] DY813353 Expressed protein [Arabidopsis thaliana (Mouse-ear cress)]			288	VKPPV	5	2.4	105	116
4	Asteraceae	Taraxacum	officinale	TA	DY818265 3 [Taraxacum officinale release] DY818265 Expressed protein [Arabidopsis thaliana (Mouse-ear cress)]			300	VKPPV	5	10.8	60	113
4	Asteraceae	Taraxacum	officinale	TA	DY818265 3 [Taraxacum officinale release] DY818265 Expressed protein [Arabidopsis thaliana (Mouse-ear cress)]			300	VKPPV	5	8.8	70	116
4	Asteraceae	Taraxacum	officinale	TA	DY820496 1 [Taraxacum officinale release] DY820496 Expressed protein [Arabidopsis thaliana (Mouse-ear cress)]			235	VKPPV	5	8.8	68	114
4	Asteraceae	Taraxacum	officinale	TA	DY820496 1 [Taraxacum officinale release] DY820496 Expressed protein [Arabidopsis thaliana (Mouse-ear cress)]			235	VKPPV	5	10.8	58	111
4	Asteraceae	Taraxacum	officinale	TA	DY820760 1 [Taraxacum officinale release] DY820760			150	VKPPV	5	6.4	73	104
4	Asteraceae	Taraxacum	officinale	TA	DY823909 3 [Taraxacum officinale release] DY823909 Expressed protein [Arabidopsis thaliana (Mouse-ear cress)]			289	VKPPV	5	10.8	52	105
4	Asteraceae	Taraxacum	officinale	TA	DY823909 3 [Taraxacum officinale release] DY823909 Expressed protein [Arabidopsis thaliana (Mouse-ear cress)]			289	VKPPV	5	8.8	62	108
4	Asteraceae	Taraxacum	officinale	TA	DY824397 2 [Taraxacum officinale release] DY824397 Expressed protein [Arabidopsis thaliana (Mouse-ear cress)]			285	VKPPV	5	8.8	71	117
4	Asteraceae	Taraxacum	officinale	TA	DY824397 2 [Taraxacum officinale release] DY824397 Expressed protein [Arabidopsis thaliana (Mouse-ear cress)]			285	VKPPV	5	10.8	61	114
4	Asteraceae	Taraxacum	officinale	TA	DY824465 3 [Taraxacum officinale release] DY824465 Expressed protein [Arabidopsis thaliana (Mouse-ear cress)]			295	VKPPV	5	10.8	59	112
4	Asteraceae	Taraxacum	officinale	TA	DY824465 3 [Taraxacum officinale release] DY824465 Expressed protein [Arabidopsis thaliana (Mouse-ear cress)]			295	VKPPV	5	8.8	69	115
4	Asteraceae	Taraxacum	officinale	TA	DY824616 2 [Taraxacum officinale release] DY824616 Expressed protein [Arabidopsis thaliana (Mouse-ear cress)]			247	VKPPV	5	10.8	60	113
4	Asteraceae	Taraxacum	officinale	TA	DY824616 2 [Taraxacum officinale release] DY824616 Expressed protein [Arabidopsis thaliana (Mouse-ear cress)]			247	VKPPV	5	8.8	70	116
4	Asteraceae	Taraxacum	officinale	TA	DY827556 1 [Taraxacum officinale release] DY827556			247	VKPPV	5	4.2	70	90
4	Apiaceae	Daucus	carota	NR	gi|1794145|dbj|BAA19128.1| unnamed protein product [Daucus carota]			347	VKPPV	5	8.6	28	70
4	Rubiaceae	Coffea	canephora	TC	TC369 2 [Coffea canephora 1] TC369 weakly similar to UniRef100_A7PF96 Cluster: Chromosome chr11 scaffold_13, whole genome shotgun sequence; n=1; Vitis vinifera|Rep: Chromosome chr11 scaffold_13, whole genome shotgun sequence - Vitis vinifera (Grape), partial (78%)			366	TLPPV	5	22	51	161
4	Asteraceae	Helianthus	annuus	TC	TC46797 1 [Helianthus annuus 6] TC46797 weakly similar to UniRef100_Q9LIE8 Cluster: Similarity to cell wall-plasma membrane linker protein; n=1; Arabidopsis thaliana|Rep: Similarity to cell wall-plasma membrane linker protein - Arabidopsis thaliana (Mouse-ear cress), partial (13%)			260	TLPPV	5	5	122	146
4	Asteraceae	Helianthus	annuus	TC	CD847397 1 [Helianthus annuus 6] CD847397 weakly similar to UniRef100_A7PF96 Cluster: Chromosome chr11 scaffold_13, whole genome shotgun sequence; n=1; Vitis vinifera|Rep: Chromosome chr11 scaffold_13, whole genome shotgun sequence - Vitis vinifera (Grape), partial (49%)			228	TLPPV	5	10.4	99	150
[truncated: 6,241 more rows]
