# Supplementary material for: Global Analysis of Proline-Rich Tandem Repeat Proteins Reveals Broad Phylogenetic Diversity in Plant Secretomes
Source: PLoS One. 2011 Aug 2;6(8):e23167. doi: 10.1371/journal.pone.0023167 (PMC3149072; doi:10.1371/journal.pone.0023167)
Supplement: Table S10 — Summary statistics of all identified Pro-rich TR clusters with respect to fuzzy cluster diagrams and the TR taxonomy. (XLS) [file pone.0023167.s020.xls]

## Sheet: TableS10
Table S10. Summary statistics of all identified Pro-rich TR clusters with respect to fuzzy cluster diagrams and the TR Taxonomy.
¹ All cluster IDs are identical to those in Table S9, Figures 1, S1 and S2.
² "Cluster Network" denotes TR clusters present in the fuzzy cluster diagrams of Figures 1, S1 and S2.
3 Clusters that passed the "species and sequence" filter, described in Materials and Methods, and shown as labeled nodes in Figure 1.
4 TR Module is defined as a TR motif that spans at least 100 aas or at least 50 aas and 33% of its protein sequence.
			Summary statistics for TR Module4 clusters							Summary statistics for TR Module4 clusters captured by TR Taxonomy
Cluster ID¹	In Cluster Network?²	Passed Cluster Filter?3	No. unique TR Modules4	No. EST/NR sequences	Plant Taxonomy		Sequences with predicted signal peptide and ≥1 TR Module4 found in cluster			TR Taxonomy (Supplemental Tables S3-S5) (classes separated by semicolon)	No. unique TR Modules4	% Total (column L/D)	No. EST/NR sequences	% Total (column N/E)	Sequences with predicted signal peptide and ≥1 TR Module4 found in cluster	% Total (column P/H)	Notes on unclassified motifs (phylogenetics)
					No. species	No. families	No. sequences	No. species	No. families
1	Yes	Yes	93	738	89	31	232	56	21	sp2,3-misc; sp4+,yxy; sp4+,vyk	85	91.3978	716	97.019	222	95.6897
3	Yes	Yes	41	425	52	19	175	32	11	sp2,vyk; sp2,3-misc; p2vyk; p2vk; p2vpvyk; p3ehk1; p3vyk	34	82.9268	408	96	168	96
4	Yes	Yes	33	176	61	26	70	36	18	p2vtl; p2vpvyk	30	90.9091	140	79.5455	65	92.8571
7	Yes	Yes	29	400	19	2	117	11	2	pqq	29	100	400	100	117	100
8	Yes	Yes	27	458	35	8	112	15	1	pepk; pdpk	27	100	458	100	112	100
9	Yes	Yes	22	255	63	22	39	20	13	sp4+,yxy; sp4vh	2	9.09091	48	18.8235	11	28.2051	SPx low comlexity (diverse)
10	Yes	Yes	22	66	15	4	32	10	3	sp2,vyk; sp4+,yxy; sp4+,vyk	21	95.4545	65	98.4848	31	96.875
11	Yes	Yes	20	51	28	9	38	24	9	pelpk1; pelpk2	20	100	51	100	38	100
12	Yes	Yes	21	143	24	7	50	15	6	sp,tp2ty	6	28.5714	57	39.8601	25	50
13	Yes	Yes	20	60	9	1	50	6	1	pelpk2	20	100	60	100	50	100
14	Yes	Yes	21	268	65	17	73	30	11	tp3a	20	95.2381	267	99.6269	72	98.6301
18	Yes	Yes	16	66	19	8	31	17	8	p2vtp; p2yxpkp2	14	87.5	58	87.8788	22	70.9677
19	Yes	Yes	17	33	8	1	26	8	1	p2mpav	17	100	33	100	26	100
20	Yes	Yes	15	76	7	4	44	5	3	sp4+,yxy	12	80	70	92.1053	40	90.9091
25	Yes	Yes	11	158	8	3	46	6	3	pepk-embed2	10	90.9091	155	98.1013	45	97.8261
26	Yes	Yes	11	319	19	1	91	9	1	pqq	10	90.9091	299	93.7304	89	97.8022
29	Yes	Yes	11	18	12	4	16	11	4	pelpk1; pelpk2	11	100	18	100	16	100
36	Yes	Yes	8	25	7	1	21	6	1	kpip	8	100	25	100	21	100
41	Yes	Yes	7	30	8	5	24	8	5	sp2yvp2y	3	42.8571	23	76.6667	18	75	AGP-Like (moss)
56	Yes	Yes	4	56	9	4	22	4	3	p2vtv	3	75	55	98.2143	21	95.4545
5.1	Yes	No	10	26	7	1	18	6	1	-	-	-	-	-	-	-	AGP-like, A-rich (Poaceae)
5.2	Yes	No	5	347	39	13	5	5	4	-	-	-	-	-	-	-	A-rich (mostly Poaceae, small domain)
6.1	Yes	No	6	16	4	4	7	4	4	sp2,spvyx	4	66.6667	14	87.5	5	71.4286	SP,GN motifs
6.2	Yes	No	4	14	5	2	5	4	2	mtp2	2	50	12	85.7143	3	60	S,P2 Ext-Like
15	Yes	No	6	14	5	3	9	5	3	-	-	-	-	-	-	-	I,L,V-rich
16.1	Yes	No	8	16	7	2	14	7	2	-	-	-	-	-	-	-	S,T,G-rich (Poaceae)
17	Yes	No	6	16	1	1	10	1	1	p3ehk2	6	100	16	100	10	100
21	Yes	No	13	19	3	1	15	2	1	pepk	13	100	19	100	15	100
22	Yes	No	13	17	8	1	14	8	1	pdpk	13	100	17	100	14	100
23	Yes	No	11	14	6	2	13	6	2	pelpk2	11	100	14	100	13	100
27	Yes	No	10	12	1	1	12	1	1	-	-	-	-	-	-	-	GAP, AGP-like (Sorghum)
28	Yes	No	5	30	11	6	10	4	3	-	-	-	-	-	-	-	G-rich (diverse)
30	Yes	No	10	43	11	5	17	9	5	sp2,3-misc; p2yxpkp2	3	30	6	13.9535	5	29.4118	SP2
31	Yes	No	8	33	10	3	13	8	3	p2yxpkp2	1	12.5	9	27.2727	3	23.0769	KPQPKP (Brassicaceae)
33	Yes	No	8	68	16	8	19	6	4	spap2	3	37.5	46	67.6471	8	42.1053	SP-rich (diverse)
34	Yes	No	7	9	3	1	9	3	1	-	-	-	-	-	-	-	T.PGV/PAV (Poaceae)
35	Yes	No	8	16	3	2	14	3	2	-	-	-	-	-	-	-	H-rich (Poaceae) 2 outliers
37	Yes	No	4	6	3	3	6	3	3	-	-	-	-	-	-	-	Ext-like, low complexity
39	Yes	No	8	19	13	6	11	8	6	-	-	-	-	-	-	-	P-rich: S,P3+
40	Yes	No	8	27	4	1	13	4	1	pelpk1; pelpk2	8	100	27	100	13	100
43	Yes	No	7	28	7	4	11	5	4	p2tvk	3	42.8571	19	67.8571	4	36.3636	KPP, TKP motifs
46	Yes	No	5	12	8	3	7	4	3	-	-	-	-	-	-	-	F-rich
47	Yes	No	6	109	12	1	15	2	1	pqq	6	100	109	100	15	100
50	Yes	No	5	7	4	2	6	3	2	p2mpav	4	80	6	85.7143	5	83.3333	MPAV
51	Yes	No	5	9	2	1	9	2	1	pdpk	5	100	9	100	9	100
52	Yes	No	5	15	6	2	9	4	2	sp,tp2ty	1	20	4	26.6667	2	22.2222
53	Yes	No	4	9	3	2	8	3	2	-	-	-	-	-	-	-	SP2, KPP (Solanum)
54	Yes	No	5	13	5	1	7	4	1	pepk; pdpk	5	100	13	100	7	100
58	Yes	No	4	15	4	2	6	4	2	-	-	-	-	-	-	-	PPTK (Gossypium), PPTQ (Solanum)
59	Yes	No	3	3	1	1	3	1	1	-	-	-	-	-	-	-	PELT motif, Festuca arundinacea-specific
61	Yes	No	4	177	17	1	13	5	1	pqq	4	100	177	100	13	100
62	Yes	No	4	6	4	3	6	4	3	pelpk1	2	50	2	33.3333	2	33.3333	PKP,PEEQ motifs
64	Yes	No	4	4	3	3	4	3	3	-	-	-	-	-	-	-	SP motifs, A-rich
65	Yes	No	3	6	1	1	5	1	1	-	-	-	-	-	-	-	PEEP motif (B.napus-specific)
67	Yes	No	3	2	1	1	2	1	1	-	-	-	-	-	-	-	AGP-Like, PPIAK motif (A.thaliana-specific)
73	Yes	No	3	3	1	1	3	1	1	pqq	3	100	3	100	3	100
89	Yes	No	6	48	8	2	16	4	1	tp3a	1	16.6667	1	2.08333	1	6.25	A,T-rich (Poaceae)
91	Yes	No	4	5	1	1	4	1	1	-	-	-	-	-	-	-	MVAP (Triticum)
92	Yes	No	5	29	17	9	13	6	5	pelpk1; pelpk2	5	100	29	100	13	100
93	Yes	No	5	5	3	2	5	3	2	-	-	-	-	-	-	-	Ext-like, SP1-3 (Brassica & Solanum)
94	Yes	No	5	6	3	3	6	3	3	-	-	-	-	-	-	-	L,T-rich
95	Yes	No	4	6	3	2	6	3	2	-	-	-	-	-	-	-	SP1-2
96	Yes	No	5	8	5	3	8	5	3	-	-	-	-	-	-	-	P-rich & S,T
97	Yes	No	5	16	6	3	9	6	3	sp4+,yxy	5	100	16	100	9	100
98	Yes	No	3	5	3	1	5	3	1	pepk-embed1	3	100	5	100	5	100
100	Yes	No	4	9	6	2	8	6	2	pelpk1; pelpk2	4	100	9	100	8	100
101	Yes	No	3	3	2	2	3	2	2	pepk; pdpk	3	100	3	100	3	100
103	Yes	No	3	5	1	1	5	1	1	-	-	-	-	-	-	-	EPE motif (Glycine max-specific)
105	Yes	No	4	24	6	4	14	5	3	-	-	-	-	-	-	-	A,T-rich (mostly Poaceae)
106	Yes	No	3	4	3	2	4	3	2	-	-	-	-	-	-	-	H, low complexity
107	Yes	No	4	12	9	3	7	4	3	p2hek1; p2hek2	2	50	10	83.3333	5	71.4286
110	Yes	No	4	10	4	3	8	4	3	-	-	-	-	-	-	-	A-rich
118	Yes	No	3	3	2	1	3	2	1	sp4+,yxy	1	33.3333	1	33.3333	1	33.3333
5.3	No	No	2	13	3	1	4	3	1	-	-	-	-	-	-	-	AGP-Like, A,K-rich (Sapindales specific)
5.4	No	No	2	10	6	4	2	1	1	-	-	-	-	-	-	-	APAY motif
5.5	No	No	2	3	2	1	3	2	1	-	-	-	-	-	-	-	Pinus-specific
6.3	No	No	2	2	2	2	2	2	2	-	-	-	-	-	-	-	L,S-rich
6.4	No	No	2	3	1	1	3	1	1	-	-	-	-	-	-	-	S_rich, PEED motif (A.thaliana)
16.2	No	No	2	4	1	1	4	1	1	-	-	-	-	-	-	-	Ext-like (SP1) (moss P.patens)
24	No	No	2	6	1	1	5	1	1	mtp3	2	100	6	100	5	100
42	No	No	7	18	8	2	8	6	2	-	-	-	-	-	-	-	seed storage-like (Poaceae)
60	No	No	4	10	3	1	9	3	1	pdpk	1	25	1	10	1	11.1111	PDPN (Oryza)
69	No	No	2	17	6	2	5	4	2	-	-	-	-	-	-	-	PRP-like (mostly wheat)
75	No	No	2	6	3	3	3	1	1	-	-	-	-	-	-	-	PPGVL
78	No	No	2	13	7	1	4	3	1	-	-	-	-	-	-	-	APVHPP (Asterales)
82	No	No	2	19	6	1	15	5	1	gqq	2	100	19	100	15	100
84	No	No	2	2	2	1	2	2	1	-	-	-	-	-	-	-	PRP-like (Poaceae)
86	No	No	2	2	1	1	2	1	1	-	-	-	-	-	-	-	Ext-like (SP2) (fern Ceratopteris)
108	No	No	2	2	1	1	2	1	1	-	-	-	-	-	-	-	D,E-rich (Helianthis-specific)
121	No	No	2	13	4	2	5	2	2	-	-	-	-	-	-	-	G-rich; lots of stop codons
131	No	No	2	3	3	1	3	3	1	-	-	-	-	-	-	-	Pinus & Picea
132	No	No	2	2	1	1	2	1	1	-	-	-	-	-	-	-	P4S (Prunus)
133	No	No	2	3	2	2	2	2	2	-	-	-	-	-	-	-	KPS motif (1 Medic TRP)
135	No	No	2	3	2	1	3	2	1	-	-	-	-	-	-	-	G3YK (Solanum)
136	No	No	2	3	1	1	3	1	1	-	-	-	-	-	-	-	nodulin? (G.max)
137	No	No	2	8	1	1	7	1	1	-	-	-	-	-	-	-	GPAIV (Citrus clementina)
139	No	No	2	21	8	2	5	5	2	mtp3	2	100	21	100	5	100
142	No	No	2	2	2	1	2	2	1	-	-	-	-	-	-	-	G-rich, AGP-Like (Helianthis-specific)
147	No	No	2	10	2	2	5	2	2	-	-	-	-	-	-	-	C-rich
148	No	No	2	3	1	1	3	1	1	-	-	-	-	-	-	-	D,E-rich, PRP-like (P.patens)
151	No	No	2	147	51	20	2	2	2	-	-	-	-	-	-	-	RNA Pol. II Carboxy Terminal Domain
158	No	No	2	5	2	2	4	2	2	pelpk2	1	50	1	20	1	25	PEEP motif
159	No	No	2	4	2	2	2	2	2	tp3a	1	50	3	75	1	50	A,T-rich (B.napus)
162	No	No	2	2	2	2	2	2	2	-	-	-	-	-	-	-	AGGM motif
